# Supplementary material for: Genome Investigation and Functional Annotation of Lactiplantibacillus plantarum YW11 Revealing Streptin and Ruminococcin-A as Potent Nutritive Bacteriocins against Gut Symbiotic Pathogens
Source: MDPI journal article supplement (doi:10.3390/molecules28020491), 2023-01-04
Supplement: s1 [file s1]

**A.**

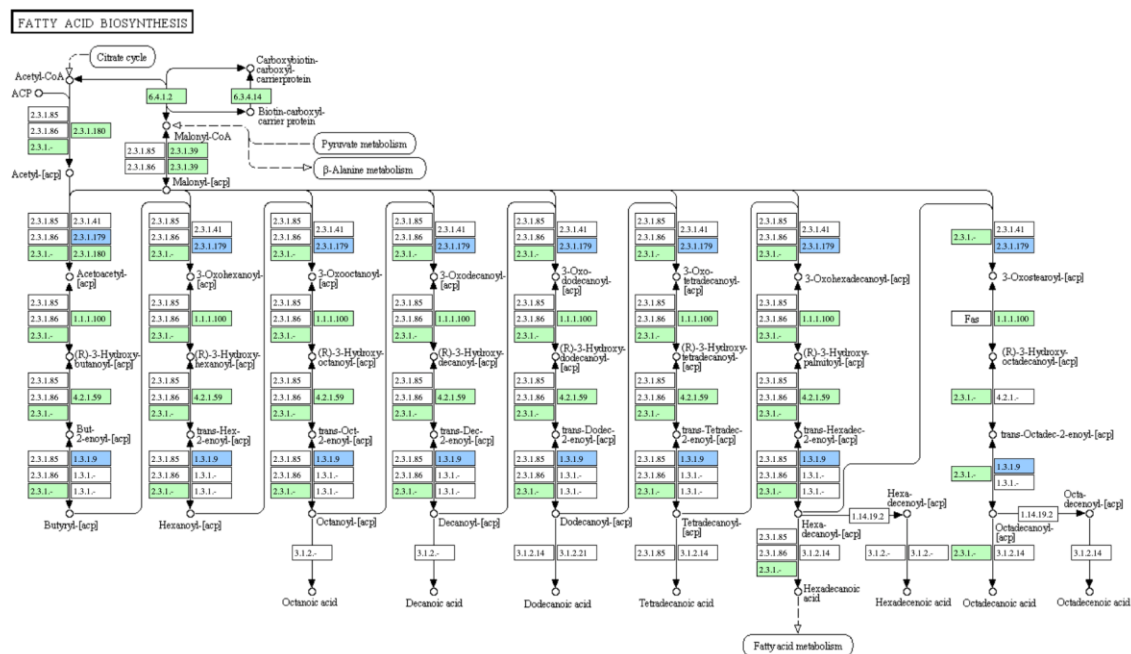

### B.

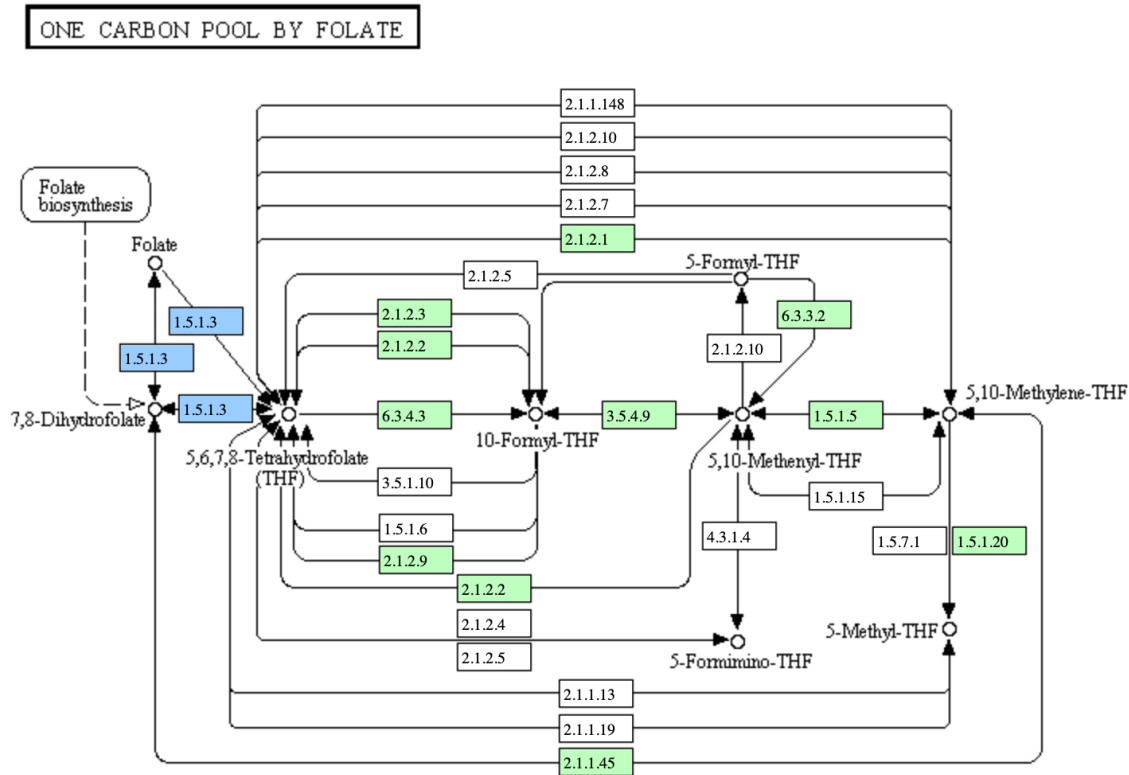

**C.**

## PEPTIDOGLYCAN BIOSYNTHESIS

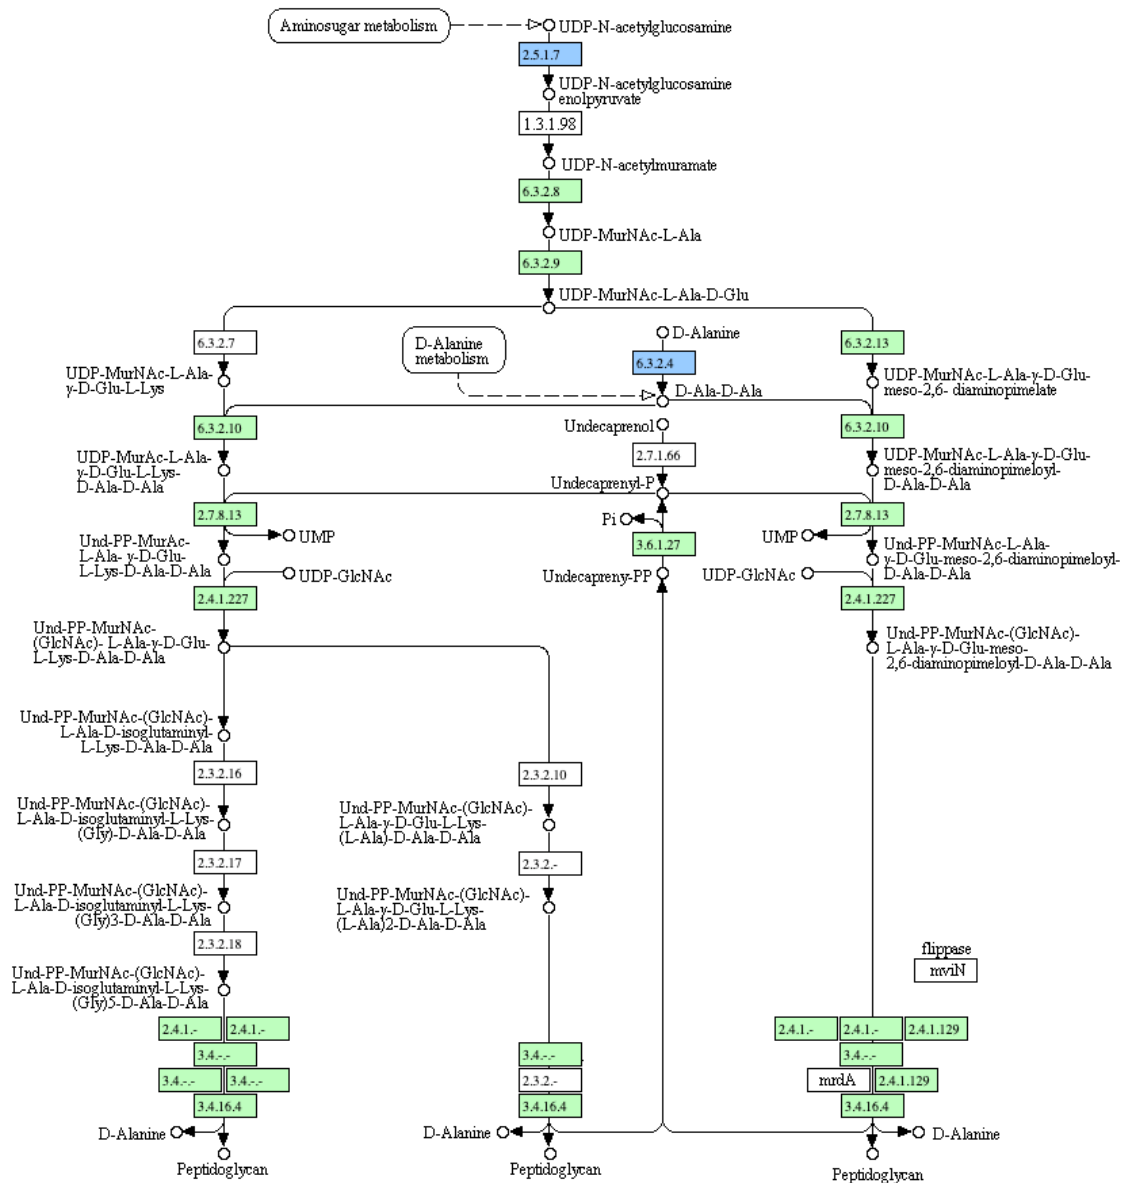

D.

PYRUVATE METABOLISM

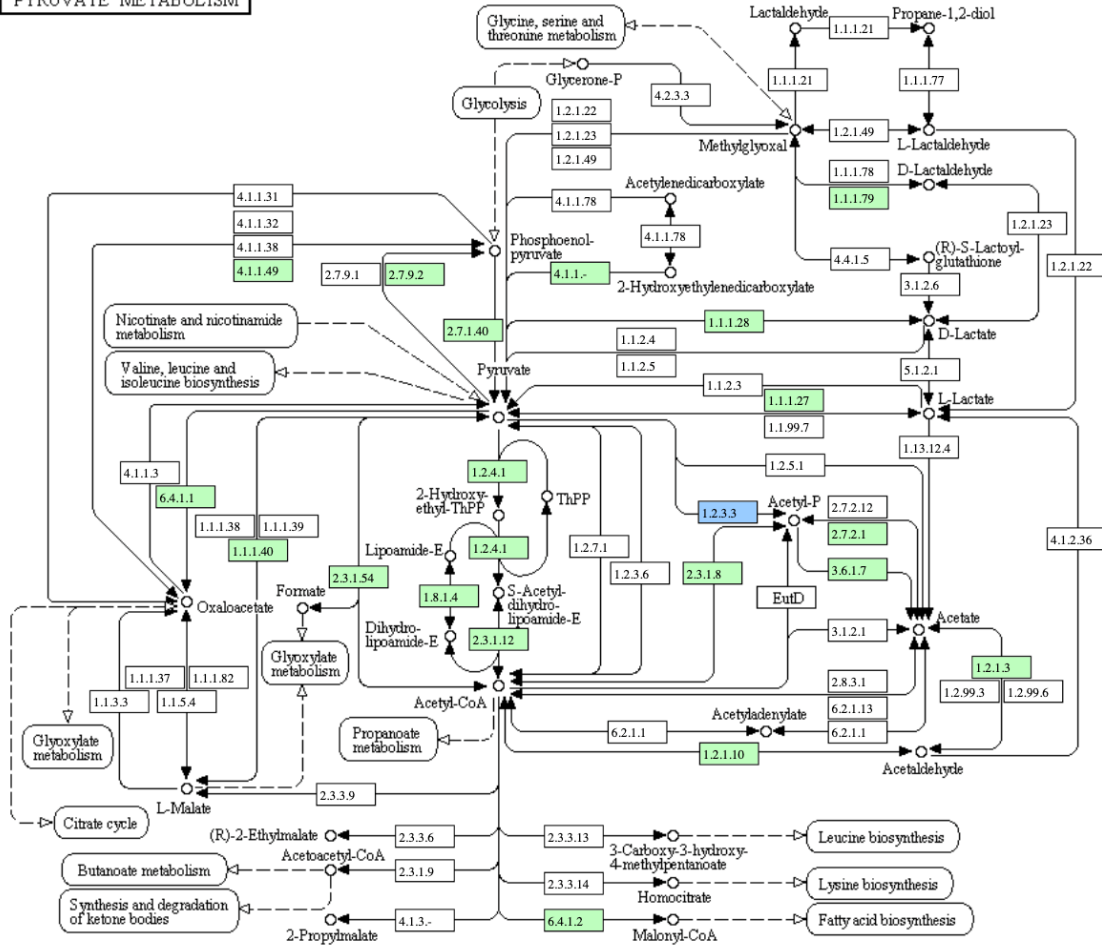

E.

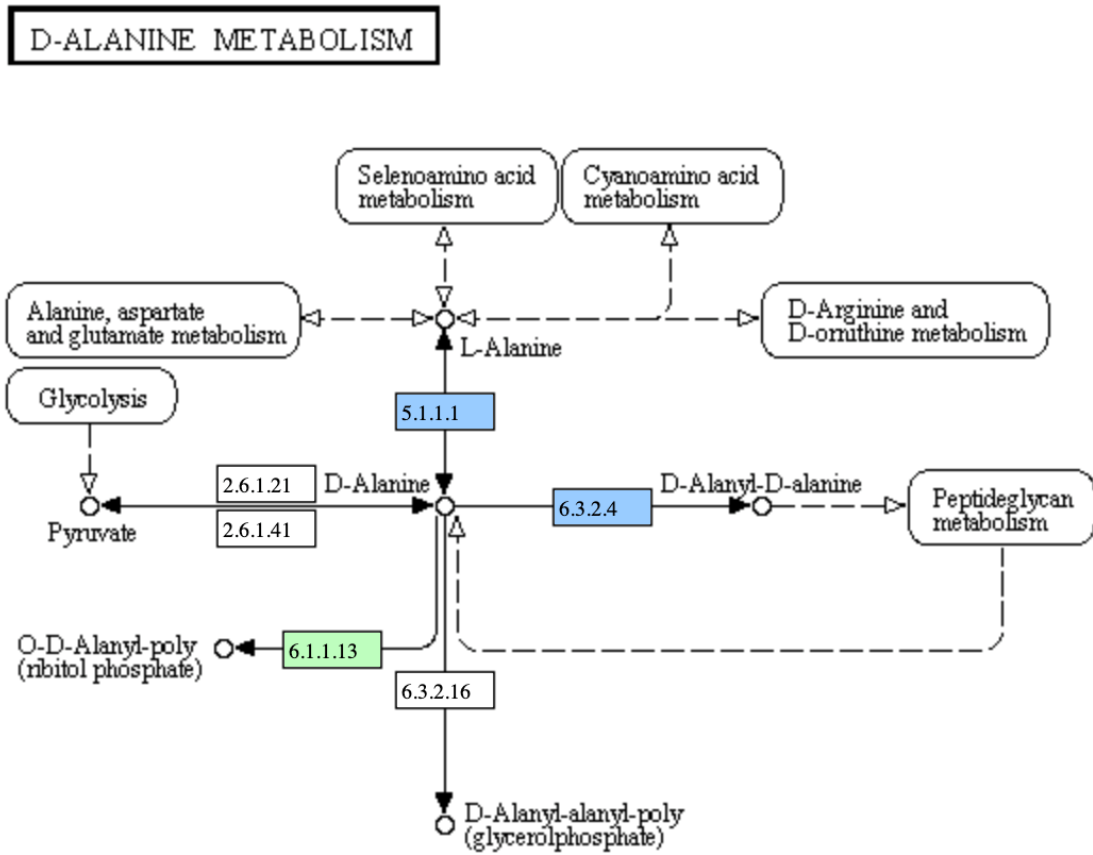

## F.

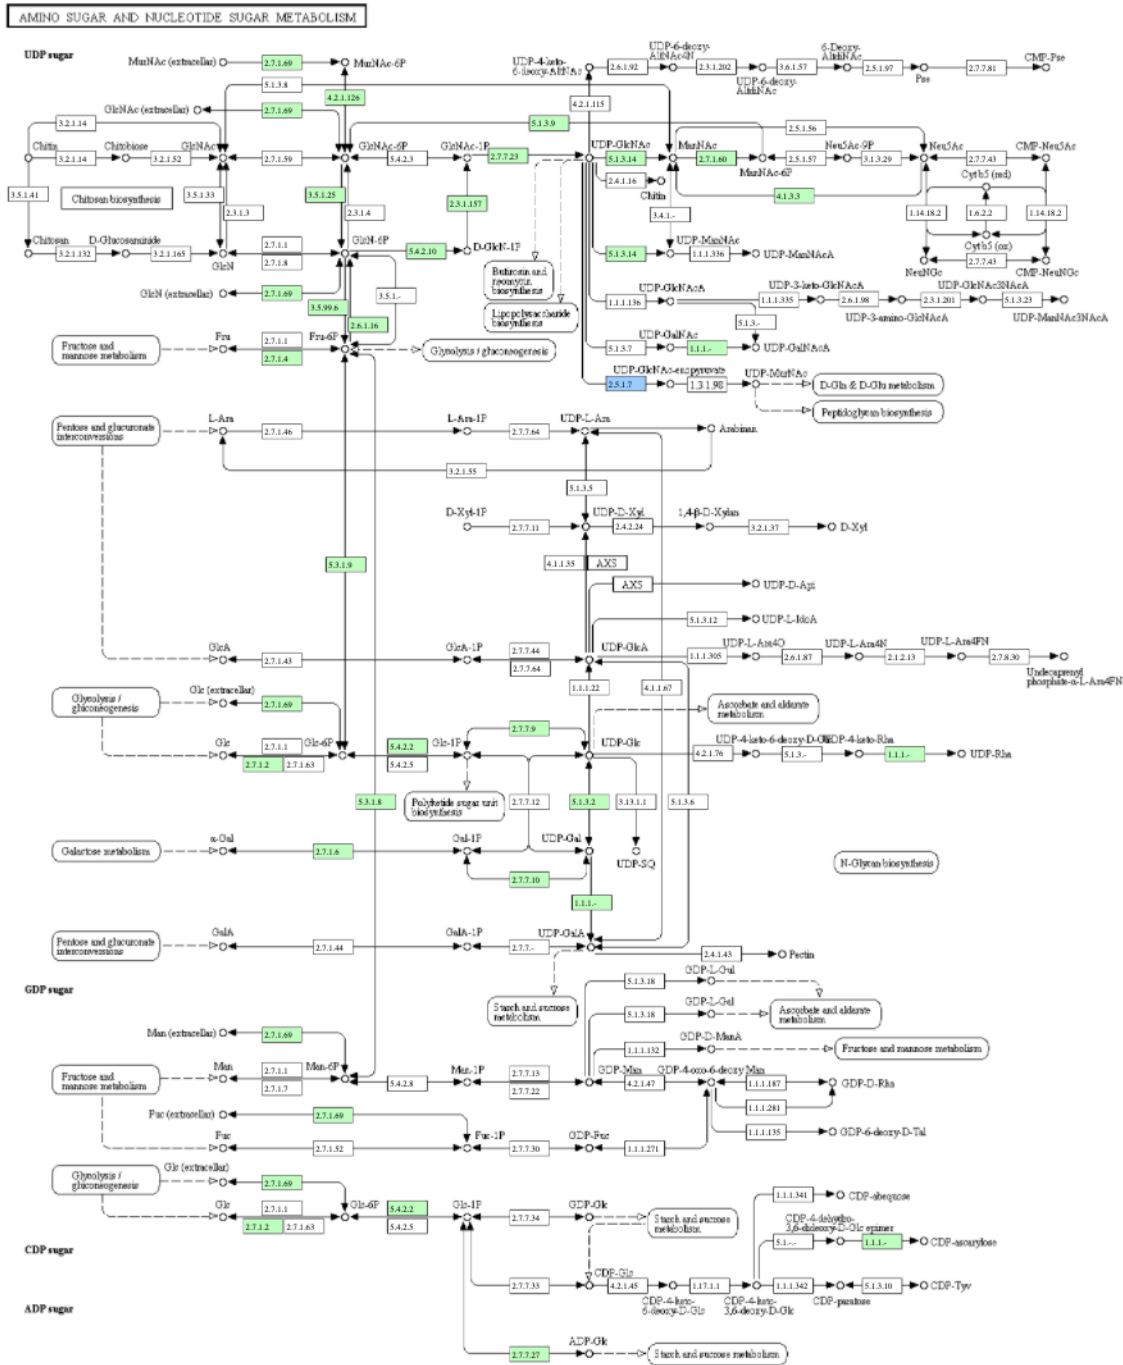

G.

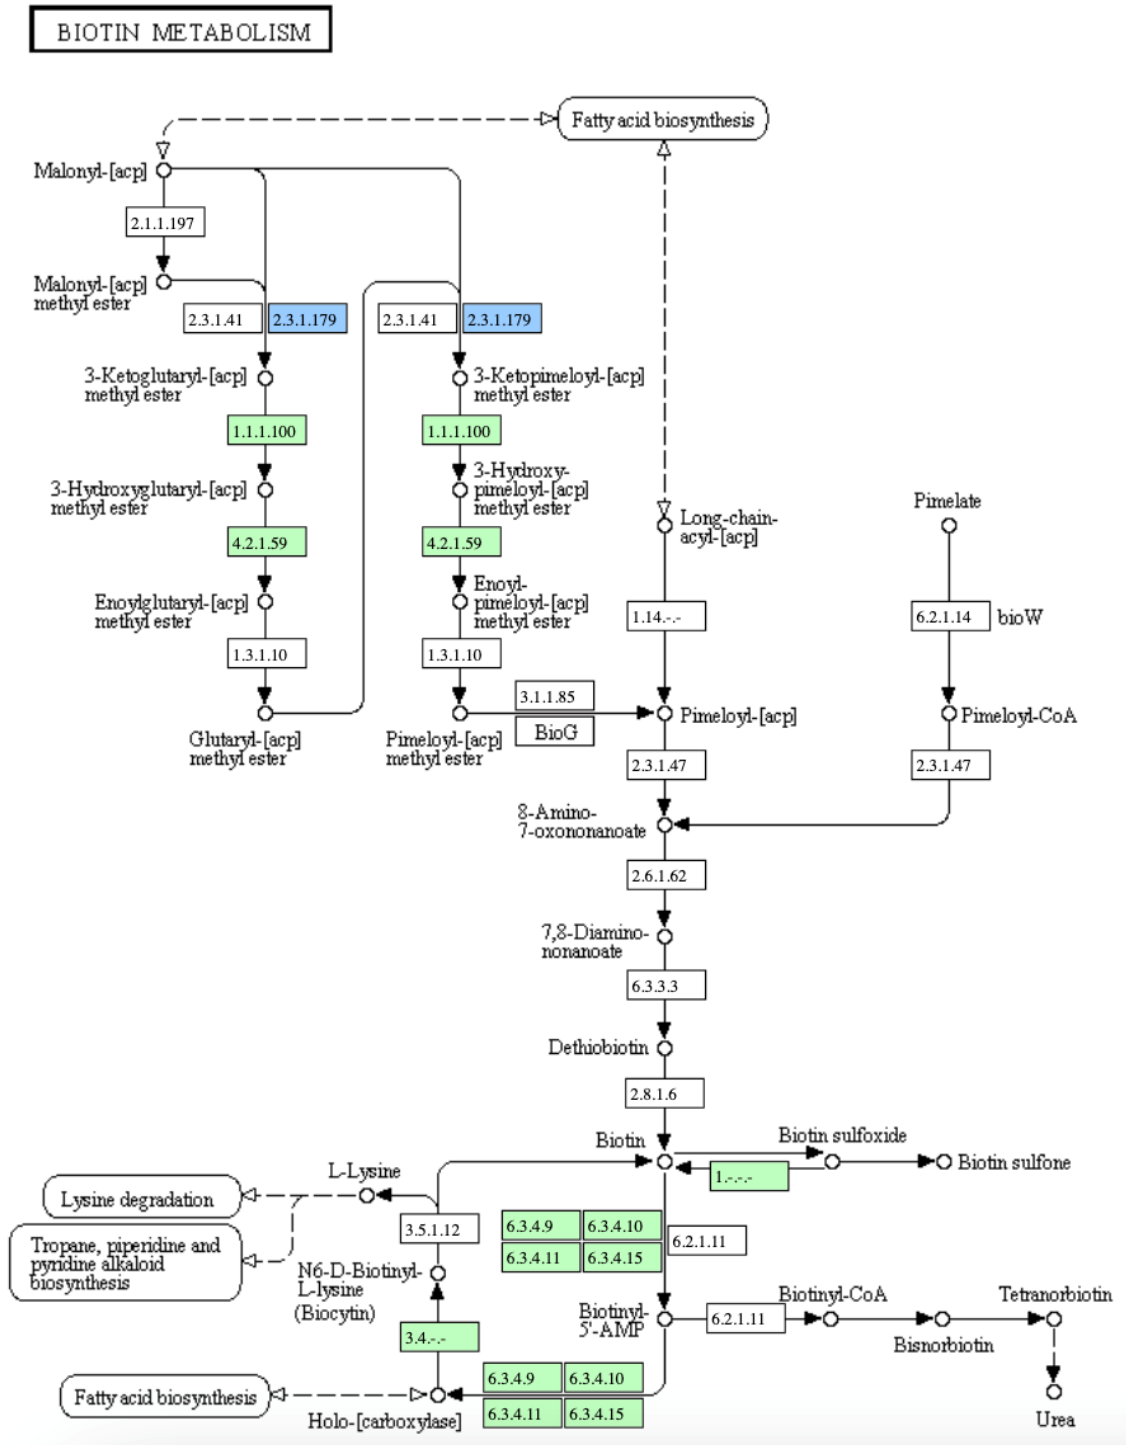

## H.

## PYRIMIDINE METABOLISM

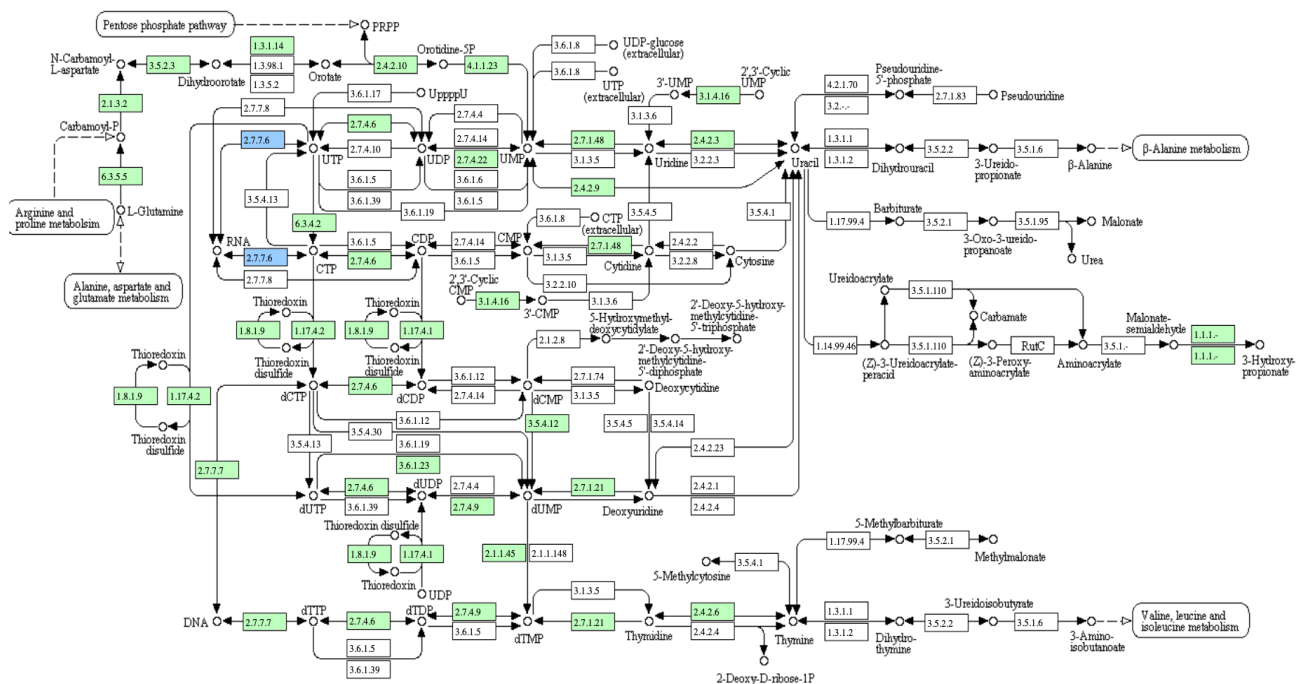

# I.

## FOLATE BIOSYNTHESIS

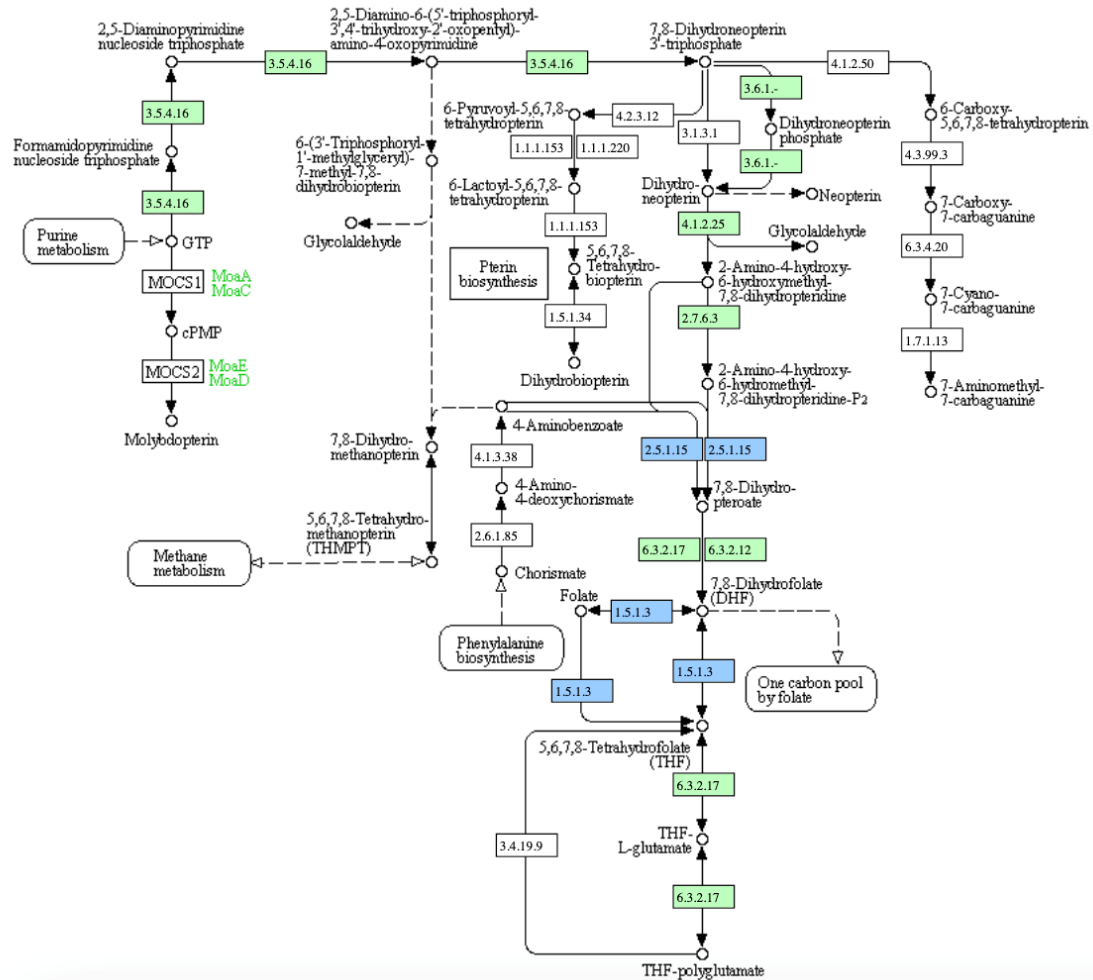



J.

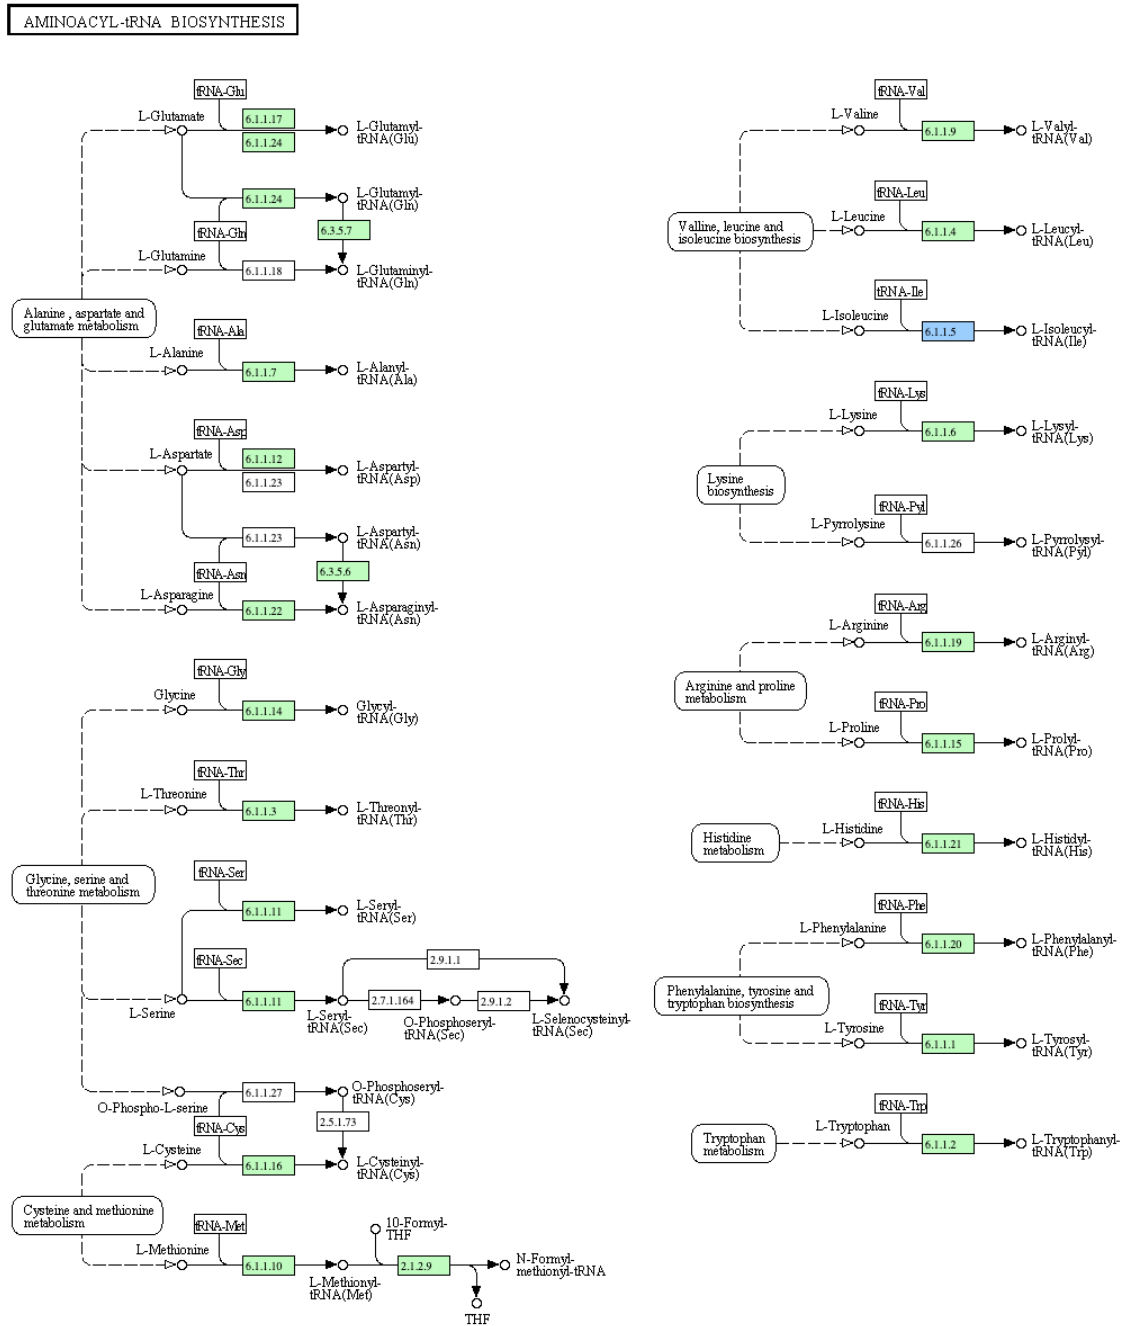

**Figure S1:** Pathways involved in the immune stress response and intestinal bowl diseases improvement. (A). Fatty acid biosynthesis (B). One carbon pool by Folate (C). Peptidoglycan Biosynthesis (D). Pyruvate metabolism (E). D-alanine metabolism (F). Amino sugar and nucleotide sugar metabolism (G). Biotin metabolism (H). Pyrimidine metabolism (I). Folate biosynthesis (J). Aminoacyl tRNA Biosynthesis.

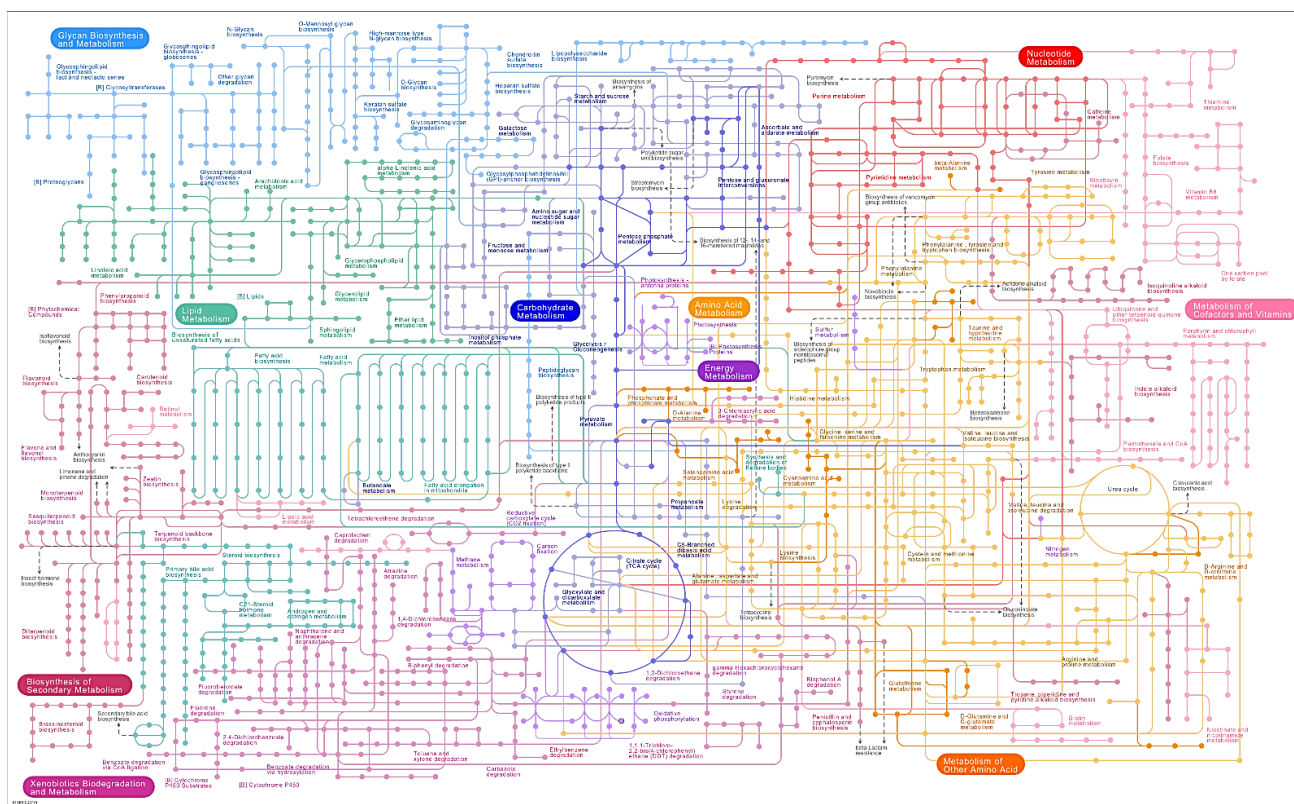

**Figure S2:** KEGG pathway for the synthesis of secondary metabolites and carbohydrates.

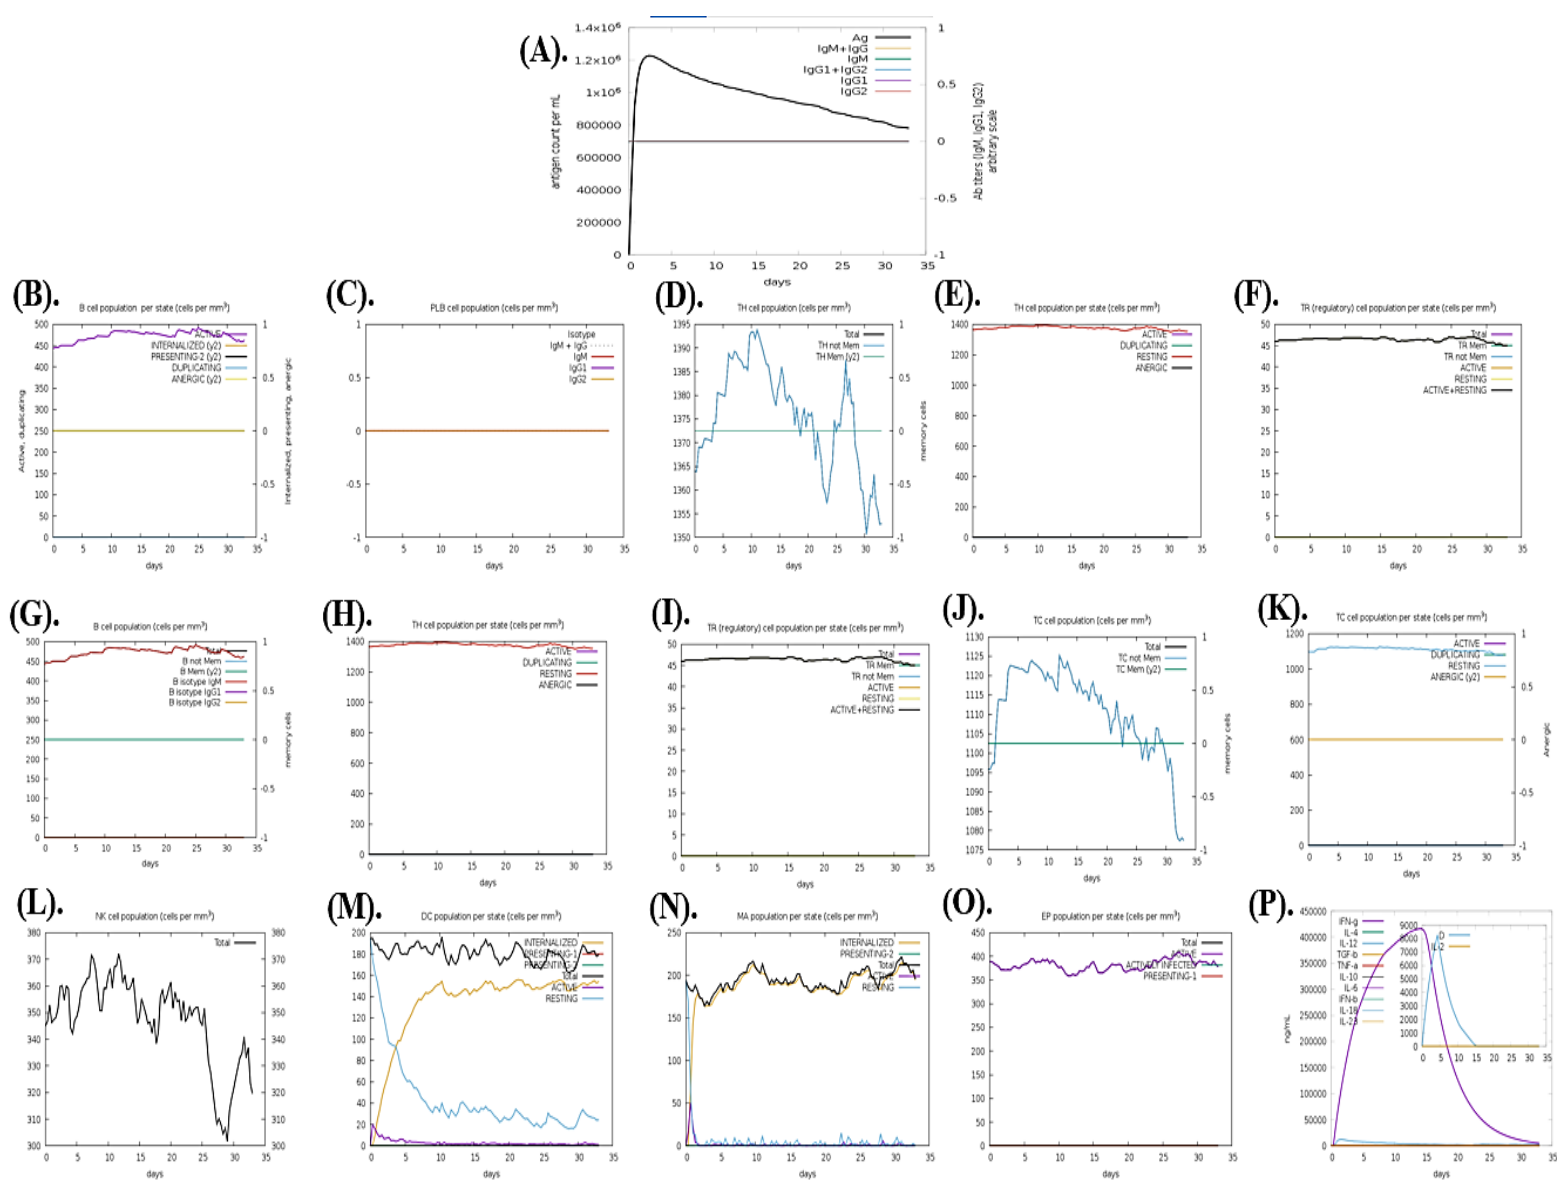

Figure S3. Immunomodulatory response after streptin dosage.

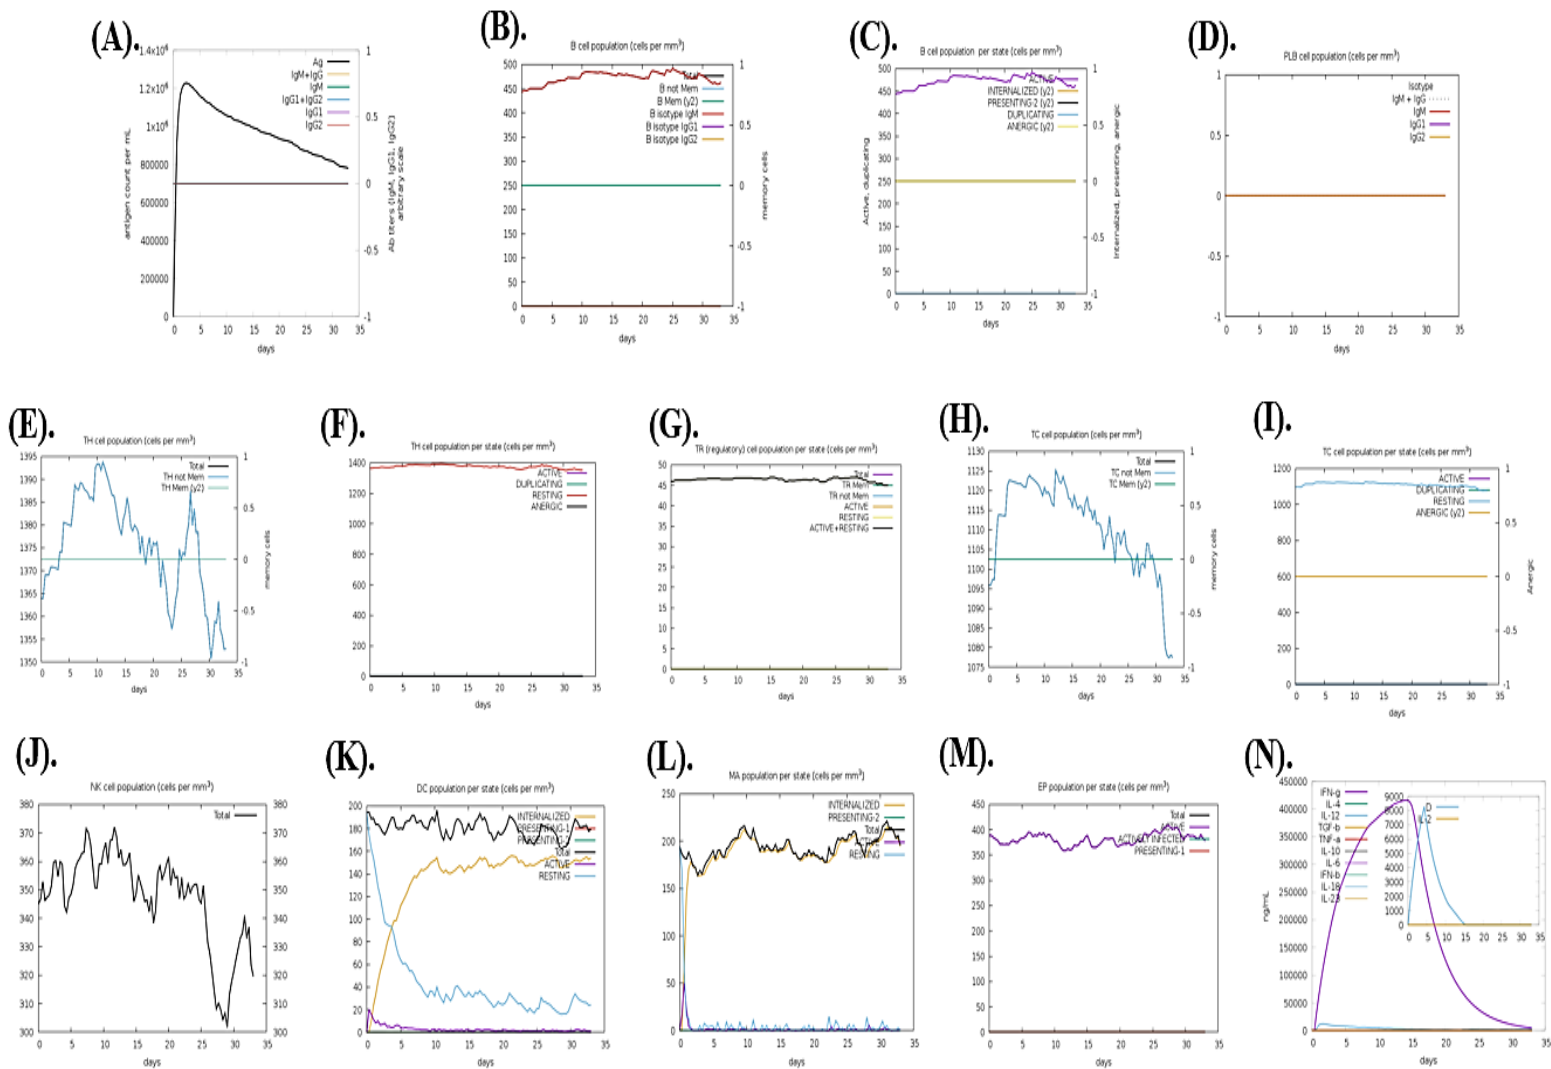

**Figure S4.** Immunomodulatory response after Ruminococcin-A dosage.
