# Supplementary material for: Genome Investigation and Functional Annotation of Lactiplantibacillus plantarum YW11 Revealing Streptin and Ruminococcin-A as Potent Nutritive Bacteriocins against Gut Symbiotic Pathogens
Source: Molecules. 2023 Jan 4;28(2):491. doi: 10.3390/molecules28020491 (PMC9862464; doi:10.3390/molecules28020491)
Supplement: Supplementary file 1 [file molecules-28-00491-s001.zip › Supplementary Tables.xlsx]

## Sheet: Table S1
Table S1: Genome wide annotation of YW-11 by RAST
Category	Subcategory	Subsystem	Role
Cofactors, Vitamins, Prosthetic Groups, Pigments	Biotin	Biotin biosynthesis	Substrate-specific component BioY of biotin ECF transporter
Cofactors, Vitamins, Prosthetic Groups, Pigments	Biotin	Biotin biosynthesis	Biotin operon repressor
Cofactors, Vitamins, Prosthetic Groups, Pigments	Cofactors, Vitamins, Prosthetic Groups, Pigments - no subcategory	Thiamin biosynthesis	Predicted hydroxymethylpyrimidine transporter CytX
Cofactors, Vitamins, Prosthetic Groups, Pigments	Cofactors, Vitamins, Prosthetic Groups, Pigments - no subcategory	Thiamin biosynthesis	Thiamin pyrophosphokinase (EC 2.7.6.2)
Cofactors, Vitamins, Prosthetic Groups, Pigments	Cofactors, Vitamins, Prosthetic Groups, Pigments - no subcategory	Thiamin biosynthesis	Substrate-specific component YkoE of thiamin-regulated ECF transporter for HydroxyMethylPyrimidine
Cofactors, Vitamins, Prosthetic Groups, Pigments	Cofactors, Vitamins, Prosthetic Groups, Pigments - no subcategory	Thiamin biosynthesis	Transmembrane component YkoC of energizing module of thiamin-regulated ECF transporter for HydroxyMethylPyrimidine
Cofactors, Vitamins, Prosthetic Groups, Pigments	Cofactors, Vitamins, Prosthetic Groups, Pigments - no subcategory	Thiamin biosynthesis	Thiamin-phosphate pyrophosphorylase (EC 2.5.1.3)
Cofactors, Vitamins, Prosthetic Groups, Pigments	Cofactors, Vitamins, Prosthetic Groups, Pigments - no subcategory	Thiamin biosynthesis	Hydroxyethylthiazole kinase (EC 2.7.1.50)
Cofactors, Vitamins, Prosthetic Groups, Pigments	Cofactors, Vitamins, Prosthetic Groups, Pigments - no subcategory	Thiamin biosynthesis	1-deoxy-D-xylulose 5-phosphate synthase (EC 2.2.1.7)
Cofactors, Vitamins, Prosthetic Groups, Pigments	Tetrapyrroles	Heme and Siroheme Biosynthesis	Glutamyl-tRNA synthetase (EC 6.1.1.17)
Cofactors, Vitamins, Prosthetic Groups, Pigments	Tetrapyrroles	Heme and Siroheme Biosynthesis	Ferrochelatase, protoheme ferro-lyase (EC 4.99.1.1)
Cofactors, Vitamins, Prosthetic Groups, Pigments	Riboflavin, FMN, FAD	riboflavin to FAD	FMN adenylyltransferase (EC 2.7.7.2)
Cofactors, Vitamins, Prosthetic Groups, Pigments	Riboflavin, FMN, FAD	riboflavin to FAD	Riboflavin synthase eubacterial/eukaryotic (EC 2.5.1.9)
Cofactors, Vitamins, Prosthetic Groups, Pigments	Riboflavin, FMN, FAD	riboflavin to FAD	Riboflavin kinase (EC 2.7.1.26)
Cofactors, Vitamins, Prosthetic Groups, Pigments	Riboflavin, FMN, FAD	riboflavin to FAD	3,4-dihydroxy-2-butanone 4-phosphate synthase (EC 4.1.99.12)
Cofactors, Vitamins, Prosthetic Groups, Pigments	Riboflavin, FMN, FAD	Flavodoxin	Flavodoxin
Cofactors, Vitamins, Prosthetic Groups, Pigments	Riboflavin, FMN, FAD	Riboflavin, FMN and FAD metabolism	FMN adenylyltransferase (EC 2.7.7.2)
Cofactors, Vitamins, Prosthetic Groups, Pigments	Riboflavin, FMN, FAD	Riboflavin, FMN and FAD metabolism	Substrate-specific component RibU of riboflavin ECF transporter
Cofactors, Vitamins, Prosthetic Groups, Pigments	Riboflavin, FMN, FAD	Riboflavin, FMN and FAD metabolism	6,7-dimethyl-8-ribityllumazine synthase (EC 2.5.1.78)
Cofactors, Vitamins, Prosthetic Groups, Pigments	Riboflavin, FMN, FAD	Riboflavin, FMN and FAD metabolism	5-Amino-6-(5'-phosphoribitylamino)uracil phosphatase
Cofactors, Vitamins, Prosthetic Groups, Pigments	Riboflavin, FMN, FAD	Riboflavin, FMN and FAD metabolism	5-amino-6-(5-phosphoribosylamino)uracil reductase (EC 1.1.1.193)
Cofactors, Vitamins, Prosthetic Groups, Pigments	Riboflavin, FMN, FAD	Riboflavin, FMN and FAD metabolism	Riboflavin kinase (EC 2.7.1.26)
Cofactors, Vitamins, Prosthetic Groups, Pigments	Riboflavin, FMN, FAD	Riboflavin, FMN and FAD metabolism	GTP cyclohydrolase II (EC 3.5.4.25)
Cofactors, Vitamins, Prosthetic Groups, Pigments	Riboflavin, FMN, FAD	Riboflavin, FMN and FAD metabolism	Riboflavin synthase eubacterial/eukaryotic (EC 2.5.1.9)
Cofactors, Vitamins, Prosthetic Groups, Pigments	Riboflavin, FMN, FAD	Riboflavin, FMN and FAD metabolism	Diaminohydroxyphosphoribosylaminopyrimidine deaminase (EC 3.5.4.26)
Cofactors, Vitamins, Prosthetic Groups, Pigments	Riboflavin, FMN, FAD	Riboflavin, FMN and FAD metabolism	3,4-dihydroxy-2-butanone 4-phosphate synthase (EC 4.1.99.12)
Cofactors, Vitamins, Prosthetic Groups, Pigments	Pyridoxine	Pyridoxin (Vitamin B6) Biosynthesis	D-3-phosphoglycerate dehydrogenase (EC 1.1.1.95)
Cofactors, Vitamins, Prosthetic Groups, Pigments	Pyridoxine	Pyridoxin (Vitamin B6) Biosynthesis	Pyridoxamine 5'-phosphate oxidase (EC 1.4.3.5)
Cofactors, Vitamins, Prosthetic Groups, Pigments	Pyridoxine	Pyridoxin (Vitamin B6) Biosynthesis	Pyridoxal kinase (EC 2.7.1.35)
Cofactors, Vitamins, Prosthetic Groups, Pigments	Pyridoxine	Pyridoxin (Vitamin B6) Biosynthesis	Phosphoserine aminotransferase (EC 2.6.1.52)
Cofactors, Vitamins, Prosthetic Groups, Pigments	Pyridoxine	Pyridoxin (Vitamin B6) Biosynthesis	NAD-dependent glyceraldehyde-3-phosphate dehydrogenase (EC 1.2.1.12)
Cofactors, Vitamins, Prosthetic Groups, Pigments	Pyridoxine	Pyridoxin (Vitamin B6) Biosynthesis	1-deoxy-D-xylulose 5-phosphate synthase (EC 2.2.1.7)
Cofactors, Vitamins, Prosthetic Groups, Pigments	Pyridoxine	Pyridoxin(Vitamin B6) Degradation Pathway	Hypothetical NagD-like phosphatase
Cofactors, Vitamins, Prosthetic Groups, Pigments	NAD and NADP	NAD and NADP cofactor biosynthesis global	NAD kinase (EC 2.7.1.23)
Cofactors, Vitamins, Prosthetic Groups, Pigments	NAD and NADP	NAD and NADP cofactor biosynthesis global	Transcriptional repressor for NAD biosynthesis in gram-positives
Cofactors, Vitamins, Prosthetic Groups, Pigments	NAD and NADP	NAD and NADP cofactor biosynthesis global	ADP-ribose pyrophosphatase (EC 3.6.1.13)
Cofactors, Vitamins, Prosthetic Groups, Pigments	NAD and NADP	NAD and NADP cofactor biosynthesis global	Niacin transporter NiaP
Cofactors, Vitamins, Prosthetic Groups, Pigments	NAD and NADP	NAD and NADP cofactor biosynthesis global	NAD synthetase (EC 6.3.1.5)
Cofactors, Vitamins, Prosthetic Groups, Pigments	NAD and NADP	NAD and NADP cofactor biosynthesis global	Ribosyl nicotinamide transporter, PnuC-like
Cofactors, Vitamins, Prosthetic Groups, Pigments	NAD and NADP	NAD and NADP cofactor biosynthesis global	Nicotinate-nucleotide adenylyltransferase (EC 2.7.7.18)
Cofactors, Vitamins, Prosthetic Groups, Pigments	NAD and NADP	NAD and NADP cofactor biosynthesis global	Nicotinamidase (EC 3.5.1.19)
Cofactors, Vitamins, Prosthetic Groups, Pigments	Folate and pterines	Folate biosynthesis cluster	GTP cyclohydrolase I (EC 3.5.4.16) type 1
Cofactors, Vitamins, Prosthetic Groups, Pigments	Folate and pterines	Folate biosynthesis cluster	Dihydropteroate synthase (EC 2.5.1.15)
Cofactors, Vitamins, Prosthetic Groups, Pigments	Folate and pterines	Folate biosynthesis cluster	Dihydroneopterin aldolase (EC 4.1.2.25)
Cofactors, Vitamins, Prosthetic Groups, Pigments	Folate and pterines	Folate biosynthesis cluster	2-amino-4-hydroxy-6-hydroxymethyldihydropteridine pyrophosphokinase (EC 2.7.6.3)
Cofactors, Vitamins, Prosthetic Groups, Pigments	Folate and pterines	Folate biosynthesis cluster	tRNA(Ile)-lysidine synthetase (EC 6.3.4.19)
Cofactors, Vitamins, Prosthetic Groups, Pigments	Folate and pterines	Folate biosynthesis cluster	Hypoxanthine-guanine phosphoribosyltransferase (EC 2.4.2.8)
Cofactors, Vitamins, Prosthetic Groups, Pigments	Folate and pterines	Molybdenum cofactor biosynthesis	GTP cyclohydrolase I (EC 3.5.4.16) type 1
Cofactors, Vitamins, Prosthetic Groups, Pigments	Folate and pterines	Molybdenum cofactor biosynthesis	Molybdenum transport ATP-binding protein ModC (TC 3.A.1.8.1)
Cofactors, Vitamins, Prosthetic Groups, Pigments	Folate and pterines	Molybdenum cofactor biosynthesis	GTP cyclohydrolase II (EC 3.5.4.25)
Cofactors, Vitamins, Prosthetic Groups, Pigments	Folate and pterines	Folate Biosynthesis	Folylpolyglutamate synthase (EC 6.3.2.17)
Cofactors, Vitamins, Prosthetic Groups, Pigments	Folate and pterines	Folate Biosynthesis	Substrate-specific component FolT of folate ECF transporter
Cofactors, Vitamins, Prosthetic Groups, Pigments	Folate and pterines	Folate Biosynthesis	Dihydropteroate synthase (EC 2.5.1.15)
Cofactors, Vitamins, Prosthetic Groups, Pigments	Folate and pterines	Folate Biosynthesis	5-formyltetrahydrofolate cyclo-ligase (EC 6.3.3.2)
Cofactors, Vitamins, Prosthetic Groups, Pigments	Folate and pterines	Folate Biosynthesis	Dihydrofolate reductase (EC 1.5.1.3)
Cofactors, Vitamins, Prosthetic Groups, Pigments	Folate and pterines	Folate Biosynthesis	Dihydrofolate synthase (EC 6.3.2.12)
Cofactors, Vitamins, Prosthetic Groups, Pigments	Folate and pterines	Folate Biosynthesis	GTP cyclohydrolase I (EC 3.5.4.16) type 1
Cofactors, Vitamins, Prosthetic Groups, Pigments	Folate and pterines	Folate Biosynthesis	Thymidylate synthase (EC 2.1.1.45)
Cofactors, Vitamins, Prosthetic Groups, Pigments	Folate and pterines	Folate Biosynthesis	2-amino-4-hydroxy-6-hydroxymethyldihydropteridine pyrophosphokinase (EC 2.7.6.3)
Cofactors, Vitamins, Prosthetic Groups, Pigments	Folate and pterines	Folate Biosynthesis	Dihydroneopterin aldolase (EC 4.1.2.25)
Cofactors, Vitamins, Prosthetic Groups, Pigments	Folate and pterines	5-FCL-like protein	Alcohol dehydrogenase (EC 1.1.1.1)
Cofactors, Vitamins, Prosthetic Groups, Pigments	Folate and pterines	5-FCL-like protein	Formate--tetrahydrofolate ligase (EC 6.3.4.3)
Cofactors, Vitamins, Prosthetic Groups, Pigments	Folate and pterines	5-FCL-like protein	5-formyltetrahydrofolate cyclo-ligase (EC 6.3.3.2)
Cofactors, Vitamins, Prosthetic Groups, Pigments	Folate and pterines	5-FCL-like protein	Dihydrofolate reductase (EC 1.5.1.3)
Cofactors, Vitamins, Prosthetic Groups, Pigments	Folate and pterines	5-FCL-like protein	Serine hydroxymethyltransferase (EC 2.1.2.1)
Cofactors, Vitamins, Prosthetic Groups, Pigments	Folate and pterines	5-FCL-like protein	Methylenetetrahydrofolate dehydrogenase (NADP+) (EC 1.5.1.5)
Cofactors, Vitamins, Prosthetic Groups, Pigments	Folate and pterines	5-FCL-like protein	Phosphoribosylglycinamide formyltransferase (EC 2.1.2.2)
Cofactors, Vitamins, Prosthetic Groups, Pigments	Folate and pterines	5-FCL-like protein	Phosphoribosylaminoimidazolecarboxamide formyltransferase (EC 2.1.2.3)
Cofactors, Vitamins, Prosthetic Groups, Pigments	Folate and pterines	5-FCL-like protein	Thiamin-phosphate pyrophosphorylase (EC 2.5.1.3)
Cofactors, Vitamins, Prosthetic Groups, Pigments	Folate and pterines	5-FCL-like protein	5,10-methylenetetrahydrofolate reductase (EC 1.5.1.20)
Cofactors, Vitamins, Prosthetic Groups, Pigments	Folate and pterines	5-FCL-like protein	Dihydrolipoamide acetyltransferase component of pyruvate dehydrogenase complex (EC 2.3.1.12)
Cofactors, Vitamins, Prosthetic Groups, Pigments	Folate and pterines	5-FCL-like protein	Hydroxyethylthiazole kinase (EC 2.7.1.50)
Cofactors, Vitamins, Prosthetic Groups, Pigments	Lipoic acid	Lipoic acid metabolism	Protein:protein lipoyl transferase
Cofactors, Vitamins, Prosthetic Groups, Pigments	Lipoic acid	Lipoic acid metabolism	Lipoate-protein ligase A
Cofactors, Vitamins, Prosthetic Groups, Pigments	Coenzyme A	Coenzyme A Biosynthesis	2-dehydropantoate 2-reductase (EC 1.1.1.169)
Cofactors, Vitamins, Prosthetic Groups, Pigments	Coenzyme A	Coenzyme A Biosynthesis	Phosphopantetheine adenylyltransferase (EC 2.7.7.3)
Cofactors, Vitamins, Prosthetic Groups, Pigments	Coenzyme A	Coenzyme A Biosynthesis	Phosphopantothenoylcysteine synthetase (EC 6.3.2.5)
Cofactors, Vitamins, Prosthetic Groups, Pigments	Coenzyme A	Coenzyme A Biosynthesis	Phosphopantothenoylcysteine decarboxylase (EC 4.1.1.36)
Cofactors, Vitamins, Prosthetic Groups, Pigments	Coenzyme A	Coenzyme A Biosynthesis	Pantothenate kinase (EC 2.7.1.33)
Cofactors, Vitamins, Prosthetic Groups, Pigments	Coenzyme A	Coenzyme A Biosynthesis	Dephospho-CoA kinase (EC 2.7.1.24)
Cell Wall and Capsule	Capsular and extracellular polysacchrides	Sialic Acid Metabolism	N-acetylneuraminate lyase (EC 4.1.3.3)
Cell Wall and Capsule	Capsular and extracellular polysacchrides	Sialic Acid Metabolism	Glucosamine-1-phosphate N-acetyltransferase (EC 2.3.1.157)
Cell Wall and Capsule	Capsular and extracellular polysacchrides	Sialic Acid Metabolism	Glucosamine-6-phosphate deaminase (EC 3.5.99.6)
Cell Wall and Capsule	Capsular and extracellular polysacchrides	Sialic Acid Metabolism	Glucosamine--fructose-6-phosphate aminotransferase [isomerizing] (EC 2.6.1.16)
Cell Wall and Capsule	Capsular and extracellular polysacchrides	Sialic Acid Metabolism	Predicted sialic acid transporter
Cell Wall and Capsule	Capsular and extracellular polysacchrides	Sialic Acid Metabolism	UDP-N-acetylglucosamine 2-epimerase (EC 5.1.3.14)
Cell Wall and Capsule	Capsular and extracellular polysacchrides	Sialic Acid Metabolism	N-acetylmannosamine kinase (EC 2.7.1.60)
Cell Wall and Capsule	Capsular and extracellular polysacchrides	Sialic Acid Metabolism	N-acetylmannosamine-6-phosphate 2-epimerase (EC 5.1.3.9)
Cell Wall and Capsule	Capsular and extracellular polysacchrides	Sialic Acid Metabolism	Phosphoglucosamine mutase (EC 5.4.2.10)
Cell Wall and Capsule	Capsular and extracellular polysacchrides	Sialic Acid Metabolism	N-acetylglucosamine-1-phosphate uridyltransferase (EC 2.7.7.23)
Cell Wall and Capsule	Capsular and extracellular polysacchrides	Sialic Acid Metabolism	N-acetylglucosamine-6-phosphate deacetylase (EC 3.5.1.25)
Cell Wall and Capsule	Capsular and extracellular polysacchrides	Sialic Acid Metabolism	Sialic acid utilization regulator, RpiR family
Cell Wall and Capsule	Cell Wall and Capsule - no subcategory	Murein Hydrolases	N-acetylmuramoyl-L-alanine amidase (EC 3.5.1.28)
Cell Wall and Capsule	Cell Wall and Capsule - no subcategory	Murein Hydrolases	D-alanyl-D-alanine carboxypeptidase (EC 3.4.16.4)
Cell Wall and Capsule	Cell Wall and Capsule - no subcategory	Murein Hydrolases	Muramoyltetrapeptide carboxypeptidase (EC 3.4.17.13)
Cell Wall and Capsule	Cell Wall and Capsule - no subcategory	UDP-N-acetylmuramate from Fructose-6-phosphate Biosynthesis	Glucosamine-1-phosphate N-acetyltransferase (EC 2.3.1.157)
Cell Wall and Capsule	Cell Wall and Capsule - no subcategory	UDP-N-acetylmuramate from Fructose-6-phosphate Biosynthesis	Glucosamine--fructose-6-phosphate aminotransferase [isomerizing] (EC 2.6.1.16)
Cell Wall and Capsule	Cell Wall and Capsule - no subcategory	UDP-N-acetylmuramate from Fructose-6-phosphate Biosynthesis	UDP-N-acetylglucosamine 1-carboxyvinyltransferase (EC 2.5.1.7)
Cell Wall and Capsule	Cell Wall and Capsule - no subcategory	UDP-N-acetylmuramate from Fructose-6-phosphate Biosynthesis	Phosphoglucosamine mutase (EC 5.4.2.10)
Cell Wall and Capsule	Cell Wall and Capsule - no subcategory	UDP-N-acetylmuramate from Fructose-6-phosphate Biosynthesis	N-acetylglucosamine-1-phosphate uridyltransferase (EC 2.7.7.23)
Cell Wall and Capsule	Cell Wall and Capsule - no subcategory	Recycling of Peptidoglycan Amino Acids	N-acetylmuramoyl-L-alanine amidase (EC 3.5.1.28)
Cell Wall and Capsule	Cell Wall and Capsule - no subcategory	Recycling of Peptidoglycan Amino Acids	Muramoyltetrapeptide carboxypeptidase (EC 3.4.17.13)
Cell Wall and Capsule	Gram-Positive cell wall components	Teichoic and lipoteichoic acids biosynthesis	Poly(glycerophosphate chain) D-alanine transfer protein DltD
Cell Wall and Capsule	Gram-Positive cell wall components	Teichoic and lipoteichoic acids biosynthesis	N-acetylmannosaminyltransferase (EC 2.4.1.187)
Cell Wall and Capsule	Gram-Positive cell wall components	Teichoic and lipoteichoic acids biosynthesis	Poly(glycerol-phosphate) alpha-glucosyltransferase (EC 2.4.1.52)
Cell Wall and Capsule	Gram-Positive cell wall components	Teichoic and lipoteichoic acids biosynthesis	Teichoic acid translocation permease protein TagG
Cell Wall and Capsule	Gram-Positive cell wall components	Teichoic and lipoteichoic acids biosynthesis	D-alanyl transfer protein DltB
Cell Wall and Capsule	Gram-Positive cell wall components	Teichoic and lipoteichoic acids biosynthesis	Teichoic acid export ATP-binding protein TagH (EC 3.6.3.40)
Cell Wall and Capsule	Gram-Positive cell wall components	Teichoic and lipoteichoic acids biosynthesis	Teichoic acid glycosylation protein
Cell Wall and Capsule	Gram-Positive cell wall components	Teichoic and lipoteichoic acids biosynthesis	CDP-glycerol: N-acetyl-beta-D-mannosaminyl-1,4-N-acetyl-D-glucosaminyldiphosphoundecaprenyl glycerophosphotransferase
Cell Wall and Capsule	Gram-Positive cell wall components	Teichoic and lipoteichoic acids biosynthesis	CDP-glycerol:poly(glycerophosphate) glycerophosphotransferase (EC 2.7.8.12)
Cell Wall and Capsule	Gram-Positive cell wall components	Teichoic and lipoteichoic acids biosynthesis	D-alanine--poly(phosphoribitol) ligase subunit 1 (EC 6.1.1.13)
Cell Wall and Capsule	Gram-Positive cell wall components	Teichoic and lipoteichoic acids biosynthesis	CDP-ribitol:poly(ribitol phosphate) ribitol phosphotransferase
Cell Wall and Capsule	Gram-Positive cell wall components	D-Alanyl Lipoteichoic Acid Biosynthesis	Poly(glycerophosphate chain) D-alanine transfer protein DltD
Cell Wall and Capsule	Gram-Positive cell wall components	D-Alanyl Lipoteichoic Acid Biosynthesis	D-alanyl transfer protein DltB
Cell Wall and Capsule	Gram-Positive cell wall components	D-Alanyl Lipoteichoic Acid Biosynthesis	D-alanine--poly(phosphoribitol) ligase subunit 1 (EC 6.1.1.13)
Cell Wall and Capsule	Gram-Positive cell wall components	Sortase	Sortase A, LPXTG specific
Virulence, Disease and Defense	Resistance to antibiotics and toxic compounds	Copper homeostasis	Negative transcriptional regulator-copper transport operon
Virulence, Disease and Defense	Resistance to antibiotics and toxic compounds	Copper homeostasis	Copper-translocating P-type ATPase (EC 3.6.3.4)
Virulence, Disease and Defense	Resistance to antibiotics and toxic compounds	Copper homeostasis	Copper chaperone
Virulence, Disease and Defense	Resistance to antibiotics and toxic compounds	Copper homeostasis	Blue copper oxidase CueO precursor
Virulence, Disease and Defense	Resistance to antibiotics and toxic compounds	Copper homeostasis	Multidrug resistance transporter, Bcr/CflA family
Virulence, Disease and Defense	Resistance to antibiotics and toxic compounds	Bile hydrolysis	Choloylglycine hydrolase (EC 3.5.1.24)
Virulence, Disease and Defense	Resistance to antibiotics and toxic compounds	Cobalt-zinc-cadmium resistance	Cobalt-zinc-cadmium resistance protein
Virulence, Disease and Defense	Resistance to antibiotics and toxic compounds	Cobalt-zinc-cadmium resistance	Probable cadmium-transporting ATPase (EC 3.6.3.3)
Virulence, Disease and Defense	Resistance to antibiotics and toxic compounds	Cobalt-zinc-cadmium resistance	Transcriptional regulator, MerR family
Virulence, Disease and Defense	Resistance to antibiotics and toxic compounds	Tetracycline resistance, ribosome protection type	Translation elongation factor G
Virulence, Disease and Defense	Resistance to antibiotics and toxic compounds	Tetracycline resistance, ribosome protection type	Ribosome protection-type tetracycline resistance related proteins, group 2
Virulence, Disease and Defense	Resistance to antibiotics and toxic compounds	Copper homeostasis: copper tolerance	Cytoplasmic copper homeostasis protein CutC
Virulence, Disease and Defense	Resistance to antibiotics and toxic compounds	Resistance to fluoroquinolones	DNA gyrase subunit B (EC 5.99.1.3)
Virulence, Disease and Defense	Resistance to antibiotics and toxic compounds	Resistance to fluoroquinolones	DNA gyrase subunit A (EC 5.99.1.3)
Virulence, Disease and Defense	Resistance to antibiotics and toxic compounds	Tetracycline resistance, ribosome protection type, too	Translation elongation factor G
Virulence, Disease and Defense	Resistance to antibiotics and toxic compounds	Tetracycline resistance, ribosome protection type, too	Ribosome protection-type tetracycline resistance related proteins, group 2
Virulence, Disease and Defense	Resistance to antibiotics and toxic compounds	Beta-lactamase	Beta-lactamase (EC 3.5.2.6)
Virulence, Disease and Defense	Resistance to antibiotics and toxic compounds	Multidrug Resistance Efflux Pumps	Transcription regulator of multidrug efflux pump operon, TetR (AcrR) family
Virulence, Disease and Defense	Resistance to antibiotics and toxic compounds	Multidrug Resistance Efflux Pumps	Multi antimicrobial extrusion protein (Na(+)/drug antiporter), MATE family of MDR efflux pumps
Virulence, Disease and Defense	Invasion and intracellular resistance	Mycobacterium virulence operon involved in protein synthesis (SSU ribosomal proteins)	SSU ribosomal protein S7p (S5e)
Virulence, Disease and Defense	Invasion and intracellular resistance	Mycobacterium virulence operon involved in protein synthesis (SSU ribosomal proteins)	Translation elongation factor G
Virulence, Disease and Defense	Invasion and intracellular resistance	Mycobacterium virulence operon involved in protein synthesis (SSU ribosomal proteins)	Translation elongation factor Tu
Virulence, Disease and Defense	Invasion and intracellular resistance	Mycobacterium virulence operon involved in protein synthesis (SSU ribosomal proteins)	SSU ribosomal protein S12p (S23e)
Virulence, Disease and Defense	Invasion and intracellular resistance	Mycobacterium virulence operon involved in DNA transcription	DNA-directed RNA polymerase beta' subunit (EC 2.7.7.6)
Virulence, Disease and Defense	Invasion and intracellular resistance	Mycobacterium virulence operon involved in DNA transcription	DNA-directed RNA polymerase beta subunit (EC 2.7.7.6)
Virulence, Disease and Defense	Invasion and intracellular resistance	Mycobacterium virulence operon involved in protein synthesis (LSU ribosomal proteins)	LSU ribosomal protein L35p
Virulence, Disease and Defense	Invasion and intracellular resistance	Mycobacterium virulence operon involved in protein synthesis (LSU ribosomal proteins)	Translation initiation factor 3
Virulence, Disease and Defense	Invasion and intracellular resistance	Mycobacterium virulence operon involved in protein synthesis (LSU ribosomal proteins)	LSU ribosomal protein L20p
Potassium metabolism	Potassium metabolism - no subcategory	Potassium homeostasis	Potassium efflux system KefA protein
Potassium metabolism	Potassium metabolism - no subcategory	Potassium homeostasis	Large-conductance mechanosensitive channel
Potassium metabolism	Potassium metabolism - no subcategory	Potassium homeostasis	Potassium voltage-gated channel subfamily KQT
Potassium metabolism	Potassium metabolism - no subcategory	Potassium homeostasis	Kup system potassium uptake protein
Miscellaneous	Plant-Prokaryote DOE project	Iron-sulfur cluster assembly	PaaD-like protein (DUF59) involved in Fe-S cluster assembly
Miscellaneous	Plant-Prokaryote DOE project	Iron-sulfur cluster assembly	Cysteine desulfurase (EC 2.8.1.7)
Miscellaneous	Plant-Prokaryote DOE project	Iron-sulfur cluster assembly	Iron-sulfur cluster assembly protein SufB
Miscellaneous	Plant-Prokaryote DOE project	Iron-sulfur cluster assembly	Putative iron-sulfur cluster assembly scaffold protein for SUF system, SufE2
Miscellaneous	Plant-Prokaryote DOE project	Iron-sulfur cluster assembly	Iron-sulfur cluster assembly protein SufD
Miscellaneous	Plant-Prokaryote DOE project	Iron-sulfur cluster assembly	Iron-sulfur cluster assembly ATPase protein SufC
Miscellaneous	Plant-Prokaryote DOE project	Niacin-Choline transport and metabolism	Nicotinamidase (EC 3.5.1.19)
Miscellaneous	Plant-Prokaryote DOE project	Niacin-Choline transport and metabolism	Niacin transporter NiaP
Miscellaneous	Miscellaneous - no subcategory	DedA family of inner membrane proteins	DedA protein
Miscellaneous	Miscellaneous - no subcategory	Muconate lactonizing enzyme family	L(+)-tartrate dehydratase beta subunit (EC 4.2.1.32)
Miscellaneous	Miscellaneous - no subcategory	Muconate lactonizing enzyme family	L(+)-tartrate dehydratase alpha subunit (EC 4.2.1.32)
Phages, Prophages, Transposable elements, Plasmids	Phages, Prophages	Phage packaging machinery	Phage terminase, small subunit
Phages, Prophages, Transposable elements, Plasmids	Phages, Prophages	Phage packaging machinery	Phage terminase small subunit
Phages, Prophages, Transposable elements, Plasmids	Phages, Prophages	Phage packaging machinery	Phage terminase, large subunit
Phages, Prophages, Transposable elements, Plasmids	Phages, Prophages	Phage packaging machinery	Phage portal protein
Phages, Prophages, Transposable elements, Plasmids	Phages, Prophages	Phage capsid proteins	Phage capsid and scaffold
Membrane Transport	Protein translocation across cytoplasmic membrane	EcsAB transporter affecting expression and secretion of secretory preproteins	ABC transporter, ATP-binding protein EcsA
Membrane Transport	Protein translocation across cytoplasmic membrane	EcsAB transporter affecting expression and secretion of secretory preproteins	Hypothetical protein SAV1839
Membrane Transport	Protein translocation across cytoplasmic membrane	EcsAB transporter affecting expression and secretion of secretory preproteins	Foldase protein PrsA precursor (EC 5.2.1.8)
Membrane Transport	Protein translocation across cytoplasmic membrane	EcsAB transporter affecting expression and secretion of secretory preproteins	ABC transporter, permease protein EscB
Membrane Transport	Cation transporters	Magnesium transport	Magnesium and cobalt transport protein CorA
Membrane Transport	Cation transporters	Transport of Nickel and Cobalt	Additional substrate-specific component NikN of nickel ECF transporter
Membrane Transport	Cation transporters	Transport of Nickel and Cobalt	Substrate-specific component NikM of nickel ECF transporter
Membrane Transport	Cation transporters	Transport of Nickel and Cobalt	ATPase component NikO of energizing module of nickel ECF transporter
Membrane Transport	Cation transporters	Transport of Nickel and Cobalt	Transmembrane component NikQ of energizing module of nickel ECF transporter
Membrane Transport	Cation transporters	Copper Transport System	Copper-translocating P-type ATPase (EC 3.6.3.4)
Membrane Transport	Membrane Transport - no subcategory	ECF class transporters	Duplicated ATPase component MtsB of energizing module of methionine-regulated ECF transporter
Membrane Transport	Membrane Transport - no subcategory	ECF class transporters	Substrate-specific component QueT (COG4708) of predicted queuosine-regulated ECF transporter
Membrane Transport	Membrane Transport - no subcategory	ECF class transporters	Substrate-specific component FolT of folate ECF transporter
Membrane Transport	Membrane Transport - no subcategory	ECF class transporters	Additional substrate-specific component NikN of nickel ECF transporter
Membrane Transport	Membrane Transport - no subcategory	ECF class transporters	Substrate-specific component NikM of nickel ECF transporter
Membrane Transport	Membrane Transport - no subcategory	ECF class transporters	ATPase component of general energizing module of ECF transporters
Membrane Transport	Membrane Transport - no subcategory	ECF class transporters	Transmembrane component MtsC of energizing module of methionine-regulated ECF transporter
Membrane Transport	Membrane Transport - no subcategory	ECF class transporters	Substrate-specific component STY3230 of queuosine-regulated ECF transporter
Membrane Transport	Membrane Transport - no subcategory	ECF class transporters	Duplicated ATPase component YkoD of energizing module of thiamin-regulated ECF transporter for HydroxyMethylPyrimidine
Membrane Transport	Membrane Transport - no subcategory	ECF class transporters	Substrate-specific component RibU of riboflavin ECF transporter
Membrane Transport	Membrane Transport - no subcategory	ECF class transporters	Substrate-specific component BioY of biotin ECF transporter
Membrane Transport	Membrane Transport - no subcategory	ECF class transporters	Transmembrane component YkoC of energizing module of thiamin-regulated ECF transporter for HydroxyMethylPyrimidine
Membrane Transport	Membrane Transport - no subcategory	ECF class transporters	Transmembrane component NikQ of energizing module of nickel ECF transporter
Membrane Transport	Membrane Transport - no subcategory	ECF class transporters	ATPase component NikO of energizing module of nickel ECF transporter
Membrane Transport	Membrane Transport - no subcategory	ECF class transporters	Substrate-specific component YkoE of thiamin-regulated ECF transporter for HydroxyMethylPyrimidine
Membrane Transport	Membrane Transport - no subcategory	ECF class transporters	Transmembrane component of general energizing module of ECF transporters
Membrane Transport	Membrane Transport - no subcategory	ECF class transporters	Substrate-specific component MtsA of methionine-regulated ECF transporter
Membrane Transport	Membrane Transport - no subcategory	ECF class transporters	Substrate-specific component PdxU of predicted pyridoxine ECF transporter
Iron acquisition and metabolism	Iron acquisition and metabolism - no subcategory	Heme, hemin uptake and utilization systems in GramPositives	Zn-dependent hydrolase YycJ/WalJ, required for cell wall metabolism and coordination of cell division with DNA replication
Iron acquisition and metabolism	Iron acquisition and metabolism - no subcategory	Heme, hemin uptake and utilization systems in GramPositives	Two-component response regulator SA14-24
Iron acquisition and metabolism	Iron acquisition and metabolism - no subcategory	Heme, hemin uptake and utilization systems in GramPositives	Sortase A, LPXTG specific
Iron acquisition and metabolism	Iron acquisition and metabolism - no subcategory	Heme, hemin uptake and utilization systems in GramPositives	Two-component sensor kinase SA14-24
Iron acquisition and metabolism	Iron acquisition and metabolism - no subcategory	Encapsulating protein for DyP-type peroxidase and ferritin-like protein oligomers	Predicted dye-decolorizing peroxidase (DyP), encapsulated subgroup
RNA Metabolism	RNA processing and modification	Ribonucleases in Bacillus	Ribonuclease J1 (endonuclease and 5' exonuclease)
RNA Metabolism	RNA processing and modification	Ribonucleases in Bacillus	Ribonuclease HII (EC 3.1.26.4)
RNA Metabolism	RNA processing and modification	Ribonucleases in Bacillus	Ribonuclease J2 (endoribonuclease in RNA processing)
RNA Metabolism	RNA processing and modification	Ribonucleases in Bacillus	5' exoribonuclease Bsu YhaM&subsystem_name=Ribonucleases_in_Bacillus'>3'->5' exoribonuclease Bsu YhaM
RNA Metabolism	RNA processing and modification	Ribonuclease H	Ribonuclease HI, Bacillus nonfunctional homolog
RNA Metabolism	RNA processing and modification	Ribonuclease H	Ribonuclease HI (EC 3.1.26.4)
RNA Metabolism	RNA processing and modification	Ribonuclease H	Ribonuclease HII (EC 3.1.26.4)
RNA Metabolism	RNA processing and modification	RNA processing and degradation, bacterial	3'-to-5' exoribonuclease RNase R
RNA Metabolism	RNA processing and modification	RNA processing and degradation, bacterial	FIG146085: 3'-to-5' oligoribonuclease A, Bacillus type
RNA Metabolism	RNA processing and modification	RNA processing and degradation, bacterial	Ribonuclease III (EC 3.1.26.3)
RNA Metabolism	RNA processing and modification	tRNA processing	Ribonuclease Z (EC 3.1.26.11)
RNA Metabolism	RNA processing and modification	tRNA processing	Ribonuclease P protein component (EC 3.1.26.5)
RNA Metabolism	RNA processing and modification	tRNA processing	tRNA dimethylallyltransferase (EC 2.5.1.75)
RNA Metabolism	RNA processing and modification	tRNA processing	tRNA(Ile)-lysidine synthetase (EC 6.3.4.19)
RNA Metabolism	RNA processing and modification	RNA methylation	tRNA (cytidine(34)-2'-O)-methyltransferase (EC 2.1.1.207)
RNA Metabolism	RNA processing and modification	RNA methylation	16S rRNA (cytosine(967)-C(5))-methyltransferase (EC 2.1.1.176)
RNA Metabolism	RNA processing and modification	RNA methylation	SSU rRNA (adenine(1518)-N(6)/adenine(1519)-N(6))-dimethyltransferase (EC 2.1.1.182)
RNA Metabolism	RNA processing and modification	RNA methylation	16S rRNA (guanine(966)-N(2))-methyltransferase (EC 2.1.1.171)
RNA Metabolism	Transcription	Transcription initiation, bacterial sigma factors	RNA polymerase sigma-54 factor RpoN
RNA Metabolism	Transcription	Transcription initiation, bacterial sigma factors	RNA polymerase sigma factor RpoD
RNA Metabolism	Transcription	RNA polymerase bacterial	DNA-directed RNA polymerase delta subunit (EC 2.7.7.6)
RNA Metabolism	Transcription	RNA polymerase bacterial	DNA-directed RNA polymerase alpha subunit (EC 2.7.7.6)
RNA Metabolism	Transcription	RNA polymerase bacterial	DNA-directed RNA polymerase beta' subunit (EC 2.7.7.6)
RNA Metabolism	Transcription	RNA polymerase bacterial	DNA-directed RNA polymerase omega subunit (EC 2.7.7.6)
RNA Metabolism	Transcription	RNA polymerase bacterial	DNA-directed RNA polymerase beta subunit (EC 2.7.7.6)
RNA Metabolism	Transcription	Transcription factors bacterial	Transcription termination protein NusB
RNA Metabolism	Transcription	Transcription factors bacterial	Transcription accessory protein (S1 RNA-binding domain)
RNA Metabolism	Transcription	Transcription factors bacterial	Transcription elongation factor GreA
RNA Metabolism	Transcription	Transcription factors bacterial	Transcription termination factor Rho
RNA Metabolism	Transcription	Transcription factors bacterial	Transcription antitermination protein NusG
RNA Metabolism	Transcription	Transcription factors bacterial	Transcription-repair coupling factor
RNA Metabolism	Transcription	Transcription factors bacterial	ribosomal protein L7Ae family protein
RNA Metabolism	Transcription	Transcription factors bacterial	COG2740: Predicted nucleic-acid-binding protein implicated in transcription termination
RNA Metabolism	Transcription	Transcription factors bacterial	Transcription termination protein NusA
RNA Metabolism	Transcription	Rrf2 family transcriptional regulators	Rrf2 family transcriptional regulator, group III
Nucleosides and Nucleotides	Pyrimidines	pyrimidine conversions	Nucleoside diphosphate kinase (EC 2.7.4.6)
Nucleosides and Nucleotides	Pyrimidines	pyrimidine conversions	Thymidylate kinase (EC 2.7.4.9)
Nucleosides and Nucleotides	Pyrimidines	pyrimidine conversions	Uridine phosphorylase (EC 2.4.2.3)
Nucleosides and Nucleotides	Pyrimidines	pyrimidine conversions	Thioredoxin reductase (EC 1.8.1.9)
Nucleosides and Nucleotides	Pyrimidines	pyrimidine conversions	Cytidylate kinase (EC 2.7.4.25)
Nucleosides and Nucleotides	Pyrimidines	pyrimidine conversions	Thymidine kinase (EC 2.7.1.21)
Nucleosides and Nucleotides	Pyrimidines	pyrimidine conversions	Thymidylate synthase (EC 2.1.1.45)
Nucleosides and Nucleotides	Pyrimidines	pyrimidine conversions	Uridine kinase (EC 2.7.1.48)
Nucleosides and Nucleotides	Pyrimidines	pyrimidine conversions	2',3'-cyclic-nucleotide 2'-phosphodiesterase (EC 3.1.4.16)
Nucleosides and Nucleotides	Pyrimidines	pyrimidine conversions	Uracil phosphoribosyltransferase (EC 2.4.2.9)
Nucleosides and Nucleotides	Pyrimidines	pyrimidine conversions	CTP synthase (EC 6.3.4.2)
Nucleosides and Nucleotides	Pyrimidines	De Novo Pyrimidine Synthesis	Uracil permease
Nucleosides and Nucleotides	Pyrimidines	De Novo Pyrimidine Synthesis	Orotidine 5'-phosphate decarboxylase (EC 4.1.1.23)
Nucleosides and Nucleotides	Pyrimidines	De Novo Pyrimidine Synthesis	Aspartate carbamoyltransferase (EC 2.1.3.2)
Nucleosides and Nucleotides	Pyrimidines	De Novo Pyrimidine Synthesis	Carbamoyl-phosphate synthase small chain (EC 6.3.5.5)
Nucleosides and Nucleotides	Pyrimidines	De Novo Pyrimidine Synthesis	Orotate phosphoribosyltransferase (EC 2.4.2.10)
Nucleosides and Nucleotides	Pyrimidines	De Novo Pyrimidine Synthesis	Carbamoyl-phosphate synthase large chain (EC 6.3.5.5)
Nucleosides and Nucleotides	Pyrimidines	De Novo Pyrimidine Synthesis	Dihydroorotase (EC 3.5.2.3)
Nucleosides and Nucleotides	Pyrimidines	De Novo Pyrimidine Synthesis	Uracil phosphoribosyltransferase (EC 2.4.2.9)
Nucleosides and Nucleotides	Pyrimidines	De Novo Pyrimidine Synthesis	Pyrimidine operon regulatory protein PyrR
Nucleosides and Nucleotides	Purines	De Novo Purine Biosynthesis	Phosphoribosylamine--glycine ligase (EC 6.3.4.13)
Nucleosides and Nucleotides	Purines	De Novo Purine Biosynthesis	IMP cyclohydrolase (EC 3.5.4.10)
Nucleosides and Nucleotides	Purines	De Novo Purine Biosynthesis	Amidophosphoribosyltransferase (EC 2.4.2.14)
Nucleosides and Nucleotides	Purines	De Novo Purine Biosynthesis	Ribose-phosphate pyrophosphokinase (EC 2.7.6.1)
Nucleosides and Nucleotides	Purines	De Novo Purine Biosynthesis	Phosphoribosylglycinamide formyltransferase (EC 2.1.2.2)
Nucleosides and Nucleotides	Purines	De Novo Purine Biosynthesis	Phosphoribosylaminoimidazole-succinocarboxamide synthase (EC 6.3.2.6)
Nucleosides and Nucleotides	Purines	De Novo Purine Biosynthesis	Adenylosuccinate lyase (EC 4.3.2.2)
Nucleosides and Nucleotides	Purines	De Novo Purine Biosynthesis	Phosphoribosylformylglycinamidine cyclo-ligase (EC 6.3.3.1)
Nucleosides and Nucleotides	Purines	De Novo Purine Biosynthesis	Phosphoribosylaminoimidazolecarboxamide formyltransferase (EC 2.1.2.3)
Nucleosides and Nucleotides	Purines	De Novo Purine Biosynthesis	Phosphoribosylformylglycinamidine synthase, PurS subunit (EC 6.3.5.3)
Nucleosides and Nucleotides	Purines	De Novo Purine Biosynthesis	Phosphoribosylaminoimidazole carboxylase ATPase subunit (EC 4.1.1.21)
Nucleosides and Nucleotides	Purines	De Novo Purine Biosynthesis	Phosphoribosylformylglycinamidine synthase, synthetase subunit (EC 6.3.5.3)
Nucleosides and Nucleotides	Purines	De Novo Purine Biosynthesis	Phosphoribosylformylglycinamidine synthase, glutamine amidotransferase subunit (EC 6.3.5.3)
Nucleosides and Nucleotides	Purines	Xanthine Metabolism in Bacteria	Xanthine phosphoribosyltransferase (EC 2.4.2.22)
Nucleosides and Nucleotides	Purines	Xanthine Metabolism in Bacteria	Xanthine permease
Nucleosides and Nucleotides	Purines	Purine Utilization	Xanthine/uracil/thiamine/ascorbate permease family protein
Nucleosides and Nucleotides	Purines	Purine Utilization	Xanthine permease
Nucleosides and Nucleotides	Purines	Purine Utilization	Cytosine/purine/uracil/thiamine/allantoin permease family protein
Nucleosides and Nucleotides	Purines	GMP synthase	GMP synthase [glutamine-hydrolyzing], ATP pyrophosphatase subunit (EC 6.3.5.2)
Nucleosides and Nucleotides	Purines	GMP synthase	GMP synthase [glutamine-hydrolyzing], amidotransferase subunit (EC 6.3.5.2)
Nucleosides and Nucleotides	Purines	Purine conversions	preQ1-regulated inosine-uridine nucleoside hydrolase (EC 3.2.2.1)
Nucleosides and Nucleotides	Purines	Purine conversions	Adenylosuccinate synthetase (EC 6.3.4.4)
Nucleosides and Nucleotides	Purines	Purine conversions	GMP synthase [glutamine-hydrolyzing], amidotransferase subunit (EC 6.3.5.2)
Nucleosides and Nucleotides	Purines	Purine conversions	Inosine-5'-monophosphate dehydrogenase (EC 1.1.1.205)
Nucleosides and Nucleotides	Purines	Purine conversions	GMP reductase (EC 1.7.1.7)
Nucleosides and Nucleotides	Purines	Purine conversions	Hypoxanthine-guanine phosphoribosyltransferase (EC 2.4.2.8)
Nucleosides and Nucleotides	Purines	Purine conversions	Adenylosuccinate lyase (EC 4.3.2.2)
Nucleosides and Nucleotides	Purines	Purine conversions	Polyphosphate kinase (EC 2.7.4.1)
Nucleosides and Nucleotides	Purines	Purine conversions	Adenine phosphoribosyltransferase (EC 2.4.2.7)
Nucleosides and Nucleotides	Purines	Purine conversions	Deoxyadenosine kinase (EC 2.7.1.76)
Nucleosides and Nucleotides	Purines	Purine conversions	2',3'-cyclic-nucleotide 2'-phosphodiesterase (EC 3.1.4.16)
Nucleosides and Nucleotides	Purines	Purine conversions	Nucleoside diphosphate kinase (EC 2.7.4.6)
Nucleosides and Nucleotides	Purines	Purine conversions	Adenylate kinase (EC 2.7.4.3)
Nucleosides and Nucleotides	Purines	Purine conversions	Inosine-uridine preferring nucleoside hydrolase (EC 3.2.2.1)
Nucleosides and Nucleotides	Purines	Purine conversions	Nucleotide pyrophosphatase (EC 3.6.1.9)
Nucleosides and Nucleotides	Purines	Purine conversions	Deoxyguanosine kinase (EC 2.7.1.113)
Nucleosides and Nucleotides	Purines	Purine conversions	Adenine deaminase (EC 3.5.4.2)
Nucleosides and Nucleotides	Purines	Purine conversions	GMP synthase [glutamine-hydrolyzing], ATP pyrophosphatase subunit (EC 6.3.5.2)
Nucleosides and Nucleotides	Purines	Purine conversions	Xanthine phosphoribosyltransferase (EC 2.4.2.22)
Nucleosides and Nucleotides	Purines	Purine conversions	5'-nucleotidase family protein in cluster with NagD-like phosphatase
Nucleosides and Nucleotides	Purines	Purine conversions	Guanylate kinase (EC 2.7.4.8)
Nucleosides and Nucleotides	Nucleosides and Nucleotides - no subcategory	Ribonucleotide reduction	Ribonucleotide reductase of class III (anaerobic), activating protein (EC 1.97.1.4)
Nucleosides and Nucleotides	Nucleosides and Nucleotides - no subcategory	Ribonucleotide reduction	Glutaredoxin-like protein NrdH, required for reduction of Ribonucleotide reductase class Ib
Nucleosides and Nucleotides	Nucleosides and Nucleotides - no subcategory	Ribonucleotide reduction	Ribonucleotide reductase of class Ib (aerobic), alpha subunit (EC 1.17.4.1)
Nucleosides and Nucleotides	Nucleosides and Nucleotides - no subcategory	Ribonucleotide reduction	Ribonucleotide reductase of class III (anaerobic), large subunit (EC 1.17.4.2)
Nucleosides and Nucleotides	Nucleosides and Nucleotides - no subcategory	Ribonucleotide reduction	Ribonucleotide reduction protein NrdI
Nucleosides and Nucleotides	Nucleosides and Nucleotides - no subcategory	Ribonucleotide reduction	Ribonucleotide reductase transcriptional regulator NrdR
Nucleosides and Nucleotides	Nucleosides and Nucleotides - no subcategory	Ribonucleotide reduction	Ribonucleotide reductase of class Ib (aerobic), beta subunit (EC 1.17.4.1)
Nucleosides and Nucleotides	Nucleosides and Nucleotides - no subcategory	Adenosyl nucleosidases	S-adenosylhomocysteine nucleosidase (EC 3.2.2.9)
Nucleosides and Nucleotides	Nucleosides and Nucleotides - no subcategory	Adenosyl nucleosidases	5'-methylthioadenosine nucleosidase (EC 3.2.2.16)
Nucleosides and Nucleotides	Detoxification	Nudix proteins (nucleoside triphosphate hydrolases)	Deoxyuridine 5'-triphosphate nucleotidohydrolase (EC 3.6.1.23)
Nucleosides and Nucleotides	Detoxification	Nudix proteins (nucleoside triphosphate hydrolases)	ADP-ribose pyrophosphatase (EC 3.6.1.13)
Nucleosides and Nucleotides	Detoxification	Housecleaning nucleoside triphosphate pyrophosphatases	Deoxyuridine 5'-triphosphate nucleotidohydrolase (EC 3.6.1.23)
Nucleosides and Nucleotides	Detoxification	Housecleaning nucleoside triphosphate pyrophosphatases	Dimeric dUTPase (EC 3.6.1.23)
Nucleosides and Nucleotides	Detoxification	Housecleaning nucleoside triphosphate pyrophosphatases	Nucleotidase YfbR, HD superfamily
Protein Metabolism	Protein folding	Protein chaperones	Heat shock protein GrpE
Protein Metabolism	Protein folding	Protein chaperones	Chaperone protein DnaK
Protein Metabolism	Protein folding	Protein chaperones	Chaperone protein DnaJ
Protein Metabolism	Protein folding	Peptidyl-prolyl cis-trans isomerase	Foldase protein PrsA precursor (EC 5.2.1.8)
Protein Metabolism	Protein biosynthesis	tRNA aminoacylation, Val	Valyl-tRNA synthetase (EC 6.1.1.9)
Protein Metabolism	Protein biosynthesis	tRNA aminoacylation, Met	Methionyl-tRNA synthetase (EC 6.1.1.10)
Protein Metabolism	Protein biosynthesis	rRNAs	5S rRNA
Protein Metabolism	Protein biosynthesis	rRNAs	SSU rRNA
Protein Metabolism	Protein biosynthesis	rRNAs	LSU rRNA
Protein Metabolism	Protein biosynthesis	tRNA aminoacylation, Ile	Isoleucyl-tRNA synthetase (EC 6.1.1.5)
Protein Metabolism	Protein biosynthesis	tRNA aminoacylation, Arg	Arginyl-tRNA synthetase (EC 6.1.1.19)
Protein Metabolism	Protein biosynthesis	Translation initiation factors bacterial	Translation initiation factor 1
Protein Metabolism	Protein biosynthesis	Translation initiation factors bacterial	Methionyl-tRNA formyltransferase (EC 2.1.2.9)
Protein Metabolism	Protein biosynthesis	Translation initiation factors bacterial	Translation initiation factor 3
Protein Metabolism	Protein biosynthesis	Translation initiation factors bacterial	Translation initiation factor 2
Protein Metabolism	Protein biosynthesis	Translation initiation factors bacterial	Ribosome-binding factor A
Protein Metabolism	Protein biosynthesis	Ribosome SSU bacterial	SSU ribosomal protein S11p (S14e)
Protein Metabolism	Protein biosynthesis	Ribosome SSU bacterial	SSU ribosomal protein S1p
Protein Metabolism	Protein biosynthesis	Ribosome SSU bacterial	SSU ribosomal protein S6p
Protein Metabolism	Protein biosynthesis	Ribosome SSU bacterial	SSU ribosomal protein S15p (S13e)
Protein Metabolism	Protein biosynthesis	Ribosome SSU bacterial	SSU ribosomal protein S14p (S29e)
Protein Metabolism	Protein biosynthesis	Ribosome SSU bacterial	SSU ribosomal protein S5p (S2e)
Protein Metabolism	Protein biosynthesis	Ribosome SSU bacterial	SSU ribosomal protein S18p
Protein Metabolism	Protein biosynthesis	Ribosome SSU bacterial	SSU ribosomal protein S17p (S11e)
Protein Metabolism	Protein biosynthesis	Ribosome SSU bacterial	SSU ribosomal protein S20p
Protein Metabolism	Protein biosynthesis	Ribosome SSU bacterial	SSU ribosomal protein S12p (S23e)
Protein Metabolism	Protein biosynthesis	Ribosome SSU bacterial	SSU ribosomal protein S9p (S16e)
Protein Metabolism	Protein biosynthesis	Ribosome SSU bacterial	SSU ribosomal protein S8p (S15Ae)
Protein Metabolism	Protein biosynthesis	Ribosome SSU bacterial	SSU ribosomal protein S4p (S9e)
Protein Metabolism	Protein biosynthesis	Ribosome SSU bacterial	SSU ribosomal protein S14p (S29e), zinc-independent
Protein Metabolism	Protein biosynthesis	Ribosome SSU bacterial	SSU ribosomal protein S19p (S15e)
Protein Metabolism	Protein biosynthesis	Ribosome SSU bacterial	SSU ribosomal protein S10p (S20e)
Protein Metabolism	Protein biosynthesis	Ribosome SSU bacterial	SSU ribosomal protein S16p
Protein Metabolism	Protein biosynthesis	Ribosome SSU bacterial	SSU ribosomal protein S3p (S3e)
Protein Metabolism	Protein biosynthesis	Ribosome SSU bacterial	SSU ribosomal protein S18p, zinc-independent
Protein Metabolism	Protein biosynthesis	Ribosome SSU bacterial	SSU ribosomal protein S7p (S5e)
Protein Metabolism	Protein biosynthesis	Ribosome SSU bacterial	SSU ribosomal protein S2p (SAe)
Protein Metabolism	Protein biosynthesis	Ribosome SSU bacterial	SSU ribosomal protein S21p
Protein Metabolism	Protein biosynthesis	Ribosome SSU bacterial	SSU ribosomal protein S13p (S18e)
Protein Metabolism	Protein biosynthesis	tRNA aminoacylation, Gly	Glycyl-tRNA synthetase alpha chain (EC 6.1.1.14)
Protein Metabolism	Protein biosynthesis	tRNA aminoacylation, Gly	Glycyl-tRNA synthetase beta chain (EC 6.1.1.14)
Protein Metabolism	Protein biosynthesis	tRNA aminoacylation, Ala	Alanyl-tRNA synthetase (EC 6.1.1.7)
Protein Metabolism	Protein biosynthesis	tRNA aminoacylation, Trp	Tryptophanyl-tRNA synthetase (EC 6.1.1.2)
Protein Metabolism	Protein biosynthesis	Programmed frameshift	programmed frameshift-containing
Protein Metabolism	Protein biosynthesis	Programmed frameshift	Peptide chain release factor 2
Protein Metabolism	Protein biosynthesis	tRNA aminoacylation, Cys	Cysteinyl-tRNA synthetase (EC 6.1.1.16)
Protein Metabolism	Protein biosynthesis	Translation termination factors bacterial	Ribosome recycling factor
Protein Metabolism	Protein biosynthesis	Translation termination factors bacterial	Peptidyl-tRNA hydrolase (EC 3.1.1.29)
Protein Metabolism	Protein biosynthesis	Translation termination factors bacterial	Peptide deformylase (EC 3.5.1.88)
Protein Metabolism	Protein biosynthesis	Translation termination factors bacterial	Peptide chain release factor 3
Protein Metabolism	Protein biosynthesis	Translation termination factors bacterial	tmRNA-binding protein SmpB
Protein Metabolism	Protein biosynthesis	Translation termination factors bacterial	Peptide chain release factor 1
Protein Metabolism	Protein biosynthesis	Translation termination factors bacterial	Methionine aminopeptidase (EC 3.4.11.18)
Protein Metabolism	Protein biosynthesis	Translation termination factors bacterial	Peptide chain release factor 2
Protein Metabolism	Protein biosynthesis	tRNA aminoacylation, His	Histidyl-tRNA synthetase (EC 6.1.1.21)
Protein Metabolism	Protein biosynthesis	tRNA aminoacylation, Asp and Asn	Aspartyl-tRNA(Asn) amidotransferase subunit C (EC 6.3.5.6)
Protein Metabolism	Protein biosynthesis	tRNA aminoacylation, Asp and Asn	Aspartyl-tRNA(Asn) amidotransferase subunit B (EC 6.3.5.6)
Protein Metabolism	Protein biosynthesis	tRNA aminoacylation, Asp and Asn	Aspartyl-tRNA synthetase (EC 6.1.1.12)
Protein Metabolism	Protein biosynthesis	tRNA aminoacylation, Asp and Asn	Asparaginyl-tRNA synthetase (EC 6.1.1.22)
Protein Metabolism	Protein biosynthesis	tRNA aminoacylation, Asp and Asn	Aspartyl-tRNA(Asn) amidotransferase subunit A (EC 6.3.5.6)
Protein Metabolism	Protein biosynthesis	Translation elongation factors bacterial	Translation elongation factor G
Protein Metabolism	Protein biosynthesis	Translation elongation factors bacterial	Translation elongation factor LepA
Protein Metabolism	Protein biosynthesis	Translation elongation factors bacterial	Translation elongation factor Tu
Protein Metabolism	Protein biosynthesis	Translation elongation factors bacterial	Translation elongation factor Ts
Protein Metabolism	Protein biosynthesis	Translation elongation factors bacterial	Translation elongation factor P
Protein Metabolism	Protein biosynthesis	tRNAs	tRNA-Phe-GAA
Protein Metabolism	Protein biosynthesis	tRNAs	tRNA-Leu-CAG
Protein Metabolism	Protein biosynthesis	tRNAs	tRNA-Arg-ACG
Protein Metabolism	Protein biosynthesis	tRNAs	tRNA-Trp-CCA
Protein Metabolism	Protein biosynthesis	tRNAs	tRNA-Leu-CAA
Protein Metabolism	Protein biosynthesis	tRNAs	tRNA-Gly-GCC
Protein Metabolism	Protein biosynthesis	tRNAs	tRNA-Ser-CGA
Protein Metabolism	Protein biosynthesis	tRNAs	tRNA-Ala-CGC
Protein Metabolism	Protein biosynthesis	tRNAs	tRNA-Arg-CCG
Protein Metabolism	Protein biosynthesis	tRNAs	tRNA-Ser-GGA
Protein Metabolism	Protein biosynthesis	tRNAs	tRNA-Pro-CGG
Protein Metabolism	Protein biosynthesis	tRNAs	tRNA-Gly-CCC
Protein Metabolism	Protein biosynthesis	tRNAs	tRNA-Cys-GCA
Protein Metabolism	Protein biosynthesis	tRNA aminoacylation, Lys	Lysyl-tRNA synthetase (class II) (EC 6.1.1.6)
Protein Metabolism	Protein biosynthesis	tRNA aminoacylation, Thr	Threonyl-tRNA synthetase (EC 6.1.1.3)
Protein Metabolism	Protein biosynthesis	tRNA aminoacylation, Pro	Prolyl-tRNA synthetase (EC 6.1.1.15), bacterial type
Protein Metabolism	Protein biosynthesis	tRNA aminoacylation, Pro	Cys-tRNA(Pro) deacylase YbaK
Protein Metabolism	Protein biosynthesis	Translation elongation factor G family	Translation elongation factor G
Protein Metabolism	Protein biosynthesis	Translation elongation factor G family	Ribosome protection-type tetracycline resistance related proteins, group 2
Protein Metabolism	Protein biosynthesis	tRNA aminoacylation, Glu and Gln	Glutamyl-tRNA(Gln) amidotransferase subunit A (EC 6.3.5.7)
Protein Metabolism	Protein biosynthesis	tRNA aminoacylation, Glu and Gln	Glutamyl-tRNA synthetase (EC 6.1.1.17)
Protein Metabolism	Protein biosynthesis	tRNA aminoacylation, Glu and Gln	Glutamyl-tRNA(Gln) amidotransferase subunit B (EC 6.3.5.7)
Protein Metabolism	Protein biosynthesis	tRNA aminoacylation, Glu and Gln	Glutamyl-tRNA(Gln) synthetase (EC 6.1.1.24)
Protein Metabolism	Protein biosynthesis	tRNA aminoacylation, Glu and Gln	Glutamyl-tRNA(Gln) amidotransferase subunit C (EC 6.3.5.7)
Protein Metabolism	Protein biosynthesis	tRNA aminoacylation, Ser	Seryl-tRNA synthetase (EC 6.1.1.11)
Protein Metabolism	Protein biosynthesis	tRNA aminoacylation, Tyr	Tyrosyl-tRNA synthetase (EC 6.1.1.1)
Protein Metabolism	Protein biosynthesis	tRNA aminoacylation, Leu	Leucyl-tRNA synthetase (EC 6.1.1.4)
Protein Metabolism	Protein biosynthesis	Glycyl-tRNA synthetase	Glycyl-tRNA synthetase alpha chain (EC 6.1.1.14)
Protein Metabolism	Protein biosynthesis	Glycyl-tRNA synthetase	Glycyl-tRNA synthetase beta chain (EC 6.1.1.14)
Protein Metabolism	Protein biosynthesis	tRNA aminoacylation, Phe	Phenylalanyl-tRNA synthetase alpha chain (EC 6.1.1.20)
Protein Metabolism	Protein biosynthesis	tRNA aminoacylation, Phe	Phenylalanyl-tRNA synthetase domain protein (Bsu YtpR)
Protein Metabolism	Protein biosynthesis	tRNA aminoacylation, Phe	Phenylalanyl-tRNA synthetase beta chain (EC 6.1.1.20)
Protein Metabolism	Protein processing and modification	Signal peptidase	Signal peptidase I (EC 3.4.21.89)
Protein Metabolism	Protein processing and modification	Signal peptidase	Lipoprotein signal peptidase (EC 3.4.23.36)
Protein Metabolism	Protein processing and modification	Protein deglycation	Ribulosamine/erythrulosamine 3-kinase potentially involved in protein deglycation
Protein Metabolism	Protein degradation	Protein degradation	Aminopeptidase YpdF (MP-, MA-, MS-, AP-, NP- specific)
Protein Metabolism	Protein degradation	Protein degradation	Aminopeptidase C (EC 3.4.22.40)
Protein Metabolism	Protein degradation	Metallocarboxypeptidases (EC 3.4.17.-)	D-alanyl-D-alanine carboxypeptidase (EC 3.4.16.4)
Protein Metabolism	Protein degradation	Metallocarboxypeptidases (EC 3.4.17.-)	Muramoyltetrapeptide carboxypeptidase (EC 3.4.17.13)
Protein Metabolism	Protein degradation	Dipeptidases (EC 3.4.13.-)	Alpha-aspartyl dipeptidase Peptidase E (EC 3.4.13.21)
Cell Division and Cell Cycle	Checkpoint control	Bacterial checkpoint-control-related cluster	Diadenylate cyclase spyDAC
Cell Division and Cell Cycle	Checkpoint control	Bacterial checkpoint-control-related cluster	Uncharacterized secreted protein associated with spyDAC
Cell Division and Cell Cycle	Checkpoint control	Bacterial checkpoint-control-related cluster	Phosphoglucosamine mutase (EC 5.4.2.10)
Cell Division and Cell Cycle	Checkpoint control	Bacterial checkpoint-control-related cluster	Bacterial checkpoint controller DisA with nucleotide-binding domain
Regulation and Cell signaling	Regulation and Cell signaling - no subcategory	LysR-family proteins in Escherichia coli	LysR family transcriptional regulator YeiE
Regulation and Cell signaling	Regulation and Cell signaling - no subcategory	HPr catabolite repression system	Phosphotransferase system, phosphocarrier protein HPr
Regulation and Cell signaling	Regulation and Cell signaling - no subcategory	HPr catabolite repression system	Catabolite control protein A
Regulation and Cell signaling	Regulation and Cell signaling - no subcategory	Sex pheromones in Enterococcus faecalis and other Firmicutes	Putative pheromone cAM373 precursor lipoprotein CamS
Regulation and Cell signaling	Regulation and Cell signaling - no subcategory	Sex pheromones in Enterococcus faecalis and other Firmicutes	Putative prenyltransferase, contains 1,4-dihydroxy-2-naphthoate octaprenyltransferase domain
Regulation and Cell signaling	Regulation and Cell signaling - no subcategory	Sex pheromones in Enterococcus faecalis and other Firmicutes	NADH dehydrogenase (EC 1.6.99.3) in cluster with putative pheromone precursor
Regulation and Cell signaling	Regulation and Cell signaling - no subcategory	Sex pheromones in Enterococcus faecalis and other Firmicutes	Lipoprotein signal peptidase (EC 3.4.23.36)
Regulation and Cell signaling	Regulation and Cell signaling - no subcategory	Sex pheromones in Enterococcus faecalis and other Firmicutes	Heptaprenyl diphosphate synthase component II (EC 2.5.1.30)
Regulation and Cell signaling	Regulation and Cell signaling - no subcategory	Sex pheromones in Enterococcus faecalis and other Firmicutes	Heptaprenyl diphosphate synthase component I (EC 2.5.1.30)
Regulation and Cell signaling	Regulation and Cell signaling - no subcategory	Stringent Response, (p)ppGpp metabolism	GTP pyrophosphokinase (EC 2.7.6.5), (p)ppGpp synthetase II
Regulation and Cell signaling	Regulation and Cell signaling - no subcategory	Stringent Response, (p)ppGpp metabolism	Guanosine-3',5'-bis(diphosphate) 3'-pyrophosphohydrolase (EC 3.1.7.2)
Regulation and Cell signaling	Programmed Cell Death and Toxin-antitoxin Systems	MazEF toxin-antitoxing (programmed cell death) system	Programmed cell death toxin YdcE
Regulation and Cell signaling	Programmed Cell Death and Toxin-antitoxin Systems	MazEF toxin-antitoxing (programmed cell death) system	Programmed cell death antitoxin MazE
Regulation and Cell signaling	Programmed Cell Death and Toxin-antitoxin Systems	MazEF toxin-antitoxing (programmed cell death) system	Programmed cell death toxin MazF
Regulation and Cell signaling	Programmed Cell Death and Toxin-antitoxin Systems	Murein hydrolase regulation and cell death	LrgA-associated membrane protein LrgB
Regulation and Cell signaling	Programmed Cell Death and Toxin-antitoxin Systems	Murein hydrolase regulation and cell death	Antiholin-like protein LrgA
Secondary Metabolism	Plant Hormones	Auxin biosynthesis	Tryptophan synthase alpha chain (EC 4.2.1.20)
Secondary Metabolism	Plant Hormones	Auxin biosynthesis	Anthranilate phosphoribosyltransferase (EC 2.4.2.18)
Secondary Metabolism	Plant Hormones	Auxin biosynthesis	Tryptophan synthase beta chain (EC 4.2.1.20)
Secondary Metabolism	Plant Hormones	Auxin biosynthesis	Phosphoribosylanthranilate isomerase (EC 5.3.1.24)
DNA Metabolism	DNA repair	DNA repair, bacterial MutL-MutS system	Recombination inhibitory protein MutS2
DNA Metabolism	DNA repair	DNA repair, bacterial MutL-MutS system	DNA mismatch repair protein MutS
DNA Metabolism	DNA repair	DNA repair, bacterial MutL-MutS system	DNA mismatch repair protein MutL
DNA Metabolism	DNA repair	DNA repair, UvrABC system	Excinuclease ABC subunit C
DNA Metabolism	DNA repair	DNA repair, UvrABC system	Excinuclease ABC subunit A paralog of unknown function
DNA Metabolism	DNA repair	DNA repair, UvrABC system	Excinuclease ABC subunit A
DNA Metabolism	DNA repair	DNA repair, UvrABC system	Excinuclease ABC subunit B
DNA Metabolism	DNA repair	DNA repair, bacterial DinG and relatives	DinG family ATP-dependent helicase CPE1197
DNA Metabolism	DNA repair	DNA repair, bacterial DinG and relatives	DinG family ATP-dependent helicase YoaA
DNA Metabolism	DNA repair	2-phosphoglycolate salvage	Phosphoglycolate phosphatase (EC 3.1.3.18)
DNA Metabolism	DNA repair	RecA and RecX	RecA protein
DNA Metabolism	DNA repair	RecA and RecX	Regulatory protein RecX
DNA Metabolism	DNA repair	DNA repair system including RecA, MutS and a hypothetical protein	DNA mismatch repair protein MutS
DNA Metabolism	DNA repair	DNA repair system including RecA, MutS and a hypothetical protein	RecA protein
DNA Metabolism	DNA repair	DNA repair system including RecA, MutS and a hypothetical protein	Regulatory protein RecX
DNA Metabolism	DNA repair	DNA repair, bacterial	Exodeoxyribonuclease VII large subunit (EC 3.1.11.6)
DNA Metabolism	DNA repair	DNA repair, bacterial	DNA repair protein RadA
DNA Metabolism	DNA repair	DNA repair, bacterial	Exonuclease SbcD
DNA Metabolism	DNA repair	DNA repair, bacterial	SOS-response repressor and protease LexA (EC 3.4.21.88)
DNA Metabolism	DNA repair	DNA repair, bacterial	DNA repair protein RecN
DNA Metabolism	DNA repair	DNA repair, bacterial	A/G-specific adenine glycosylase (EC 3.2.2.-)
DNA Metabolism	DNA repair	DNA repair, bacterial	DNA polymerase IV (EC 2.7.7.7)
DNA Metabolism	DNA repair	DNA repair, bacterial	Exonuclease SbcC
DNA Metabolism	DNA repair	DNA repair, bacterial	Single-stranded DNA-binding protein
DNA Metabolism	DNA repair	DNA repair, bacterial	Methylated-DNA--protein-cysteine methyltransferase (EC 2.1.1.63)
DNA Metabolism	DNA repair	DNA repair, bacterial	Endonuclease IV (EC 3.1.21.2)
DNA Metabolism	DNA repair	DNA repair, bacterial	RecA protein
DNA Metabolism	DNA repair	DNA repair, bacterial	Exodeoxyribonuclease III (EC 3.1.11.2)
DNA Metabolism	DNA repair	DNA repair, bacterial	Exodeoxyribonuclease VII small subunit (EC 3.1.11.6)
DNA Metabolism	DNA repair	DNA repair, bacterial RecFOR pathway	ATP-dependent DNA helicase RecQ
DNA Metabolism	DNA repair	DNA repair, bacterial RecFOR pathway	RecU Holliday junction resolvase
DNA Metabolism	DNA repair	DNA repair, bacterial RecFOR pathway	Single-stranded DNA-binding protein
DNA Metabolism	DNA repair	DNA repair, bacterial RecFOR pathway	Recombination protein RecR
DNA Metabolism	DNA repair	DNA repair, bacterial RecFOR pathway	RecA protein
DNA Metabolism	DNA repair	DNA repair, bacterial RecFOR pathway	DNA recombination and repair protein RecO
DNA Metabolism	DNA repair	DNA repair, bacterial RecFOR pathway	DNA recombination and repair protein RecF
DNA Metabolism	DNA repair	DNA repair, bacterial RecBCD pathway	RecD-like DNA helicase YrrC
DNA Metabolism	DNA Metabolism - no subcategory	Type I Restriction-Modification	Type I restriction-modification system, restriction subunit R (EC 3.1.21.3)
DNA Metabolism	DNA Metabolism - no subcategory	Type I Restriction-Modification	Type I restriction-modification system, DNA-methyltransferase subunit M (EC 2.1.1.72)
DNA Metabolism	DNA Metabolism - no subcategory	Restriction-Modification System	Type I restriction-modification system, restriction subunit R (EC 3.1.21.3)
DNA Metabolism	DNA Metabolism - no subcategory	Restriction-Modification System	Type I restriction-modification system, DNA-methyltransferase subunit M (EC 2.1.1.72)
DNA Metabolism	DNA Metabolism - no subcategory	DNA structural proteins, bacterial	Chromosome partition protein smc
DNA Metabolism	DNA Metabolism - no subcategory	DNA structural proteins, bacterial	DNA-binding protein HBsu
DNA Metabolism	DNA replication	DNA topoisomerases, Type I, ATP-independent	DNA topoisomerase I (EC 5.99.1.2)
DNA Metabolism	DNA replication	DNA replication strays	DNA polymerase III polC-type (EC 2.7.7.7)
DNA Metabolism	DNA replication	DNA topoisomerases, Type II, ATP-dependent	DNA gyrase subunit B (EC 5.99.1.3)
DNA Metabolism	DNA replication	DNA topoisomerases, Type II, ATP-dependent	DNA gyrase subunit A (EC 5.99.1.3)
DNA Metabolism	DNA uptake, competence	DNA processing cluster	Recombination protein RecR
DNA Metabolism	DNA uptake, competence	DNA processing cluster	FIG015094: hypothetical protein
DNA Metabolism	DNA uptake, competence	DNA processing cluster	DNA polymerase III subunits gamma and tau (EC 2.7.7.7)
Fatty Acids, Lipids, and Isoprenoids	Triacylglycerols	Triacylglycerol metabolism	Lysophospholipase L2 (EC 3.1.1.5)
Fatty Acids, Lipids, and Isoprenoids	Fatty acids	Fatty Acid Biosynthesis FASII	Acetyl-coenzyme A carboxyl transferase alpha chain (EC 6.4.1.2)
Fatty Acids, Lipids, and Isoprenoids	Fatty acids	Fatty Acid Biosynthesis FASII	Enoyl-[acyl-carrier-protein] reductase [NADH] (EC 1.3.1.9)
Fatty Acids, Lipids, and Isoprenoids	Fatty acids	Fatty Acid Biosynthesis FASII	Biotin carboxyl carrier protein of acetyl-CoA carboxylase
Fatty Acids, Lipids, and Isoprenoids	Fatty acids	Fatty Acid Biosynthesis FASII	Biotin carboxylase of acetyl-CoA carboxylase (EC 6.3.4.14)
Fatty Acids, Lipids, and Isoprenoids	Fatty acids	Fatty Acid Biosynthesis FASII	4'-phosphopantetheinyl transferase (EC 2.7.8.-)
Fatty Acids, Lipids, and Isoprenoids	Fatty acids	Fatty Acid Biosynthesis FASII	Acetyl-coenzyme A carboxyl transferase beta chain (EC 6.4.1.2)
Fatty Acids, Lipids, and Isoprenoids	Fatty acids	Fatty Acid Biosynthesis FASII	Acyl carrier protein
Fatty Acids, Lipids, and Isoprenoids	Fatty acids	Fatty Acid Biosynthesis FASII	Malonyl CoA-acyl carrier protein transacylase (EC 2.3.1.39)
Fatty Acids, Lipids, and Isoprenoids	Fatty acids	Fatty Acid Biosynthesis FASII	3-hydroxyacyl-[acyl-carrier-protein] dehydratase, FabZ form (EC 4.2.1.59)
Fatty Acids, Lipids, and Isoprenoids	Isoprenoids	Mevalonate Branch of Isoprenoid Biosynthesis	Diphosphomevalonate decarboxylase (EC 4.1.1.33)
Fatty Acids, Lipids, and Isoprenoids	Isoprenoids	Mevalonate Branch of Isoprenoid Biosynthesis	Phosphomevalonate kinase (EC 2.7.4.2)
Fatty Acids, Lipids, and Isoprenoids	Isoprenoids	Mevalonate Branch of Isoprenoid Biosynthesis	Mevalonate kinase (EC 2.7.1.36)
Fatty Acids, Lipids, and Isoprenoids	Isoprenoids	Mevalonate Branch of Isoprenoid Biosynthesis	Hydroxymethylglutaryl-CoA synthase (EC 2.3.3.10)
Fatty Acids, Lipids, and Isoprenoids	Isoprenoids	Mevalonate Branch of Isoprenoid Biosynthesis	Hydroxymethylglutaryl-CoA reductase (EC 1.1.1.34)
Fatty Acids, Lipids, and Isoprenoids	Isoprenoids	Isoprenoinds for Quinones	Undecaprenyl diphosphate synthase (EC 2.5.1.31)
Fatty Acids, Lipids, and Isoprenoids	Isoprenoids	Isoprenoinds for Quinones	Heptaprenyl diphosphate synthase component II (EC 2.5.1.30)
Fatty Acids, Lipids, and Isoprenoids	Isoprenoids	Isoprenoinds for Quinones	Heptaprenyl diphosphate synthase component I (EC 2.5.1.30)
Fatty Acids, Lipids, and Isoprenoids	Isoprenoids	Isoprenoinds for Quinones	(2E,6E)-farnesyl diphosphate synthase (EC 2.5.1.10)
Fatty Acids, Lipids, and Isoprenoids	Isoprenoids	Polyprenyl Diphosphate Biosynthesis	Undecaprenyl diphosphate synthase (EC 2.5.1.31)
Fatty Acids, Lipids, and Isoprenoids	Isoprenoids	Polyprenyl Diphosphate Biosynthesis	Heptaprenyl diphosphate synthase component II (EC 2.5.1.30)
Fatty Acids, Lipids, and Isoprenoids	Isoprenoids	Polyprenyl Diphosphate Biosynthesis	Heptaprenyl diphosphate synthase component I (EC 2.5.1.30)
Fatty Acids, Lipids, and Isoprenoids	Isoprenoids	Polyprenyl Diphosphate Biosynthesis	Dehydrosqualene synthase (EC 2.5.1.96)
Fatty Acids, Lipids, and Isoprenoids	Isoprenoids	Polyprenyl Diphosphate Biosynthesis	(2E,6E)-farnesyl diphosphate synthase (EC 2.5.1.10)
Fatty Acids, Lipids, and Isoprenoids	Isoprenoids	Isoprenoid Biosynthesis: Interconversions	Isopentenyl-diphosphate delta-isomerase, FMN-dependent (EC 5.3.3.2)
Fatty Acids, Lipids, and Isoprenoids	Isoprenoids	Isoprenoid Biosynthesis: Interconversions	(2E,6E)-farnesyl diphosphate synthase (EC 2.5.1.10)
Dormancy and Sporulation	Dormancy and Sporulation - no subcategory	Sporulation-associated proteins with broader functions	Peptidyl-tRNA hydrolase (EC 3.1.1.29)
Dormancy and Sporulation	Dormancy and Sporulation - no subcategory	Sporulation Cluster	RNA binding protein, contains ribosomal protein S1 domain
Dormancy and Sporulation	Dormancy and Sporulation - no subcategory	Sporulation Cluster	Ribosome-associated heat shock protein implicated in the recycling of the 50S subunit (S4 paralog)
Dormancy and Sporulation	Dormancy and Sporulation - no subcategory	Sporulation Cluster	FIG006789: Stage V sporulation protein
Dormancy and Sporulation	Dormancy and Sporulation - no subcategory	Sporulation Cluster	Cell division protein DivIC (FtsB), stabilizes FtsL against RasP cleavage
Dormancy and Sporulation	Dormancy and Sporulation - no subcategory	Sporulation Cluster	Transcription-repair coupling factor
Respiration	ATP synthases	F0F1-type ATP synthase	ATP synthase F0 sector subunit c (EC 3.6.3.14)
Respiration	ATP synthases	F0F1-type ATP synthase	ATP synthase delta chain (EC 3.6.3.14)
Respiration	ATP synthases	F0F1-type ATP synthase	ATP synthase beta chain (EC 3.6.3.14)
Respiration	ATP synthases	F0F1-type ATP synthase	ATP synthase gamma chain (EC 3.6.3.14)
Respiration	ATP synthases	F0F1-type ATP synthase	ATP synthase F0 sector subunit b (EC 3.6.3.14)
Respiration	ATP synthases	F0F1-type ATP synthase	ATP synthase F0 sector subunit a (EC 3.6.3.14)
Respiration	ATP synthases	F0F1-type ATP synthase	ATP synthase alpha chain (EC 3.6.3.14)
Respiration	ATP synthases	F0F1-type ATP synthase	ATP synthase epsilon chain (EC 3.6.3.14)
Respiration	Electron accepting reactions	Terminal cytochrome d ubiquinol oxidases	Cytochrome d ubiquinol oxidase subunit I (EC 1.10.3.-)
Respiration	Electron accepting reactions	Terminal cytochrome d ubiquinol oxidases	Cytochrome d ubiquinol oxidase subunit II (EC 1.10.3.-)
Respiration	Electron accepting reactions	Anaerobic respiratory reductases	Ferredoxin reductase
Respiration	Electron accepting reactions	Terminal cytochrome oxidases	Cytochrome d ubiquinol oxidase subunit I (EC 1.10.3.-)
Respiration	Electron accepting reactions	Terminal cytochrome oxidases	Cytochrome d ubiquinol oxidase subunit II (EC 1.10.3.-)
Respiration	Electron donating reactions	Respiratory dehydrogenases 1	NADH dehydrogenase (EC 1.6.99.3)
Respiration	Electron donating reactions	Succinate dehydrogenase	Fumarate reductase flavoprotein subunit (EC 1.3.99.1)
Respiration	Respiration - no subcategory	Quinone oxidoreductase family	Quinone oxidoreductase (EC 1.6.5.5)
Stress Response	Osmotic stress	Osmoregulation	Aquaporin Z
Stress Response	Osmotic stress	Osmoregulation	Propanediol diffusion facilitator
Stress Response	Osmotic stress	Osmoregulation	Glycerol uptake facilitator protein
Stress Response	Osmotic stress	Choline and Betaine Uptake and Betaine Biosynthesis	Choline ABC transport system, permease protein OpuBB
Stress Response	Osmotic stress	Choline and Betaine Uptake and Betaine Biosynthesis	Choline ABC transport system, choline-binding protein OpuBC
Stress Response	Osmotic stress	Choline and Betaine Uptake and Betaine Biosynthesis	Glycine betaine ABC transport system, glycine betaine-binding protein OpuAC
Stress Response	Osmotic stress	Choline and Betaine Uptake and Betaine Biosynthesis	Glycine betaine ABC transport system, ATP-binding protein OpuAA (EC 3.6.3.32)
Stress Response	Osmotic stress	Choline and Betaine Uptake and Betaine Biosynthesis	Choline ABC transport system, permease protein OpuBD
Stress Response	Osmotic stress	Choline and Betaine Uptake and Betaine Biosynthesis	Glycine betaine ABC transport system, permease protein OpuAB
Stress Response	Osmotic stress	Choline and Betaine Uptake and Betaine Biosynthesis	Choline ABC transport system, ATP-binding protein OpuBA
Stress Response	Oxidative stress	Glutathione: Biosynthesis and gamma-glutamyl cycle	Glutathione biosynthesis bifunctional protein gshF (EC 6.3.2.2)(EC 6.3.2.3)
Stress Response	Oxidative stress	Glutathione: Redox cycle	Glutaredoxin-like protein NrdH, required for reduction of Ribonucleotide reductase class Ib
Stress Response	Oxidative stress	Glutathione: Redox cycle	Glutathione peroxidase (EC 1.11.1.9)
Stress Response	Oxidative stress	Glutaredoxins	Glutaredoxin-like protein NrdH, required for reduction of Ribonucleotide reductase class Ib
Stress Response	Detoxification	Uptake of selenate and selenite	DedA protein
Metabolism of Aromatic Compounds	Peripheral pathways for catabolism of aromatic compounds	Quinate degradation	Shikimate/quinate 5-dehydrogenase I beta (EC 1.1.1.282)
Metabolism of Aromatic Compounds	Peripheral pathways for catabolism of aromatic compounds	Quinate degradation	3-dehydroquinate dehydratase I (EC 4.2.1.10)
Metabolism of Aromatic Compounds	Peripheral pathways for catabolism of aromatic compounds	Biphenyl Degradation	biphenyl-2,3-diol 1,2-dioxygenase III-related protein
Metabolism of Aromatic Compounds	Peripheral pathways for catabolism of aromatic compounds	Biphenyl Degradation	Acetaldehyde dehydrogenase (EC 1.2.1.10)
Amino Acids and Derivatives	Glutamine, glutamate, aspartate, asparagine; ammonia assimilation	Glutamine, Glutamate, Aspartate and Asparagine Biosynthesis	L-asparaginase (EC 3.5.1.1)
Amino Acids and Derivatives	Glutamine, glutamate, aspartate, asparagine; ammonia assimilation	Glutamine, Glutamate, Aspartate and Asparagine Biosynthesis	Aspartate--ammonia ligase (EC 6.3.1.1)
Amino Acids and Derivatives	Glutamine, glutamate, aspartate, asparagine; ammonia assimilation	Glutamine, Glutamate, Aspartate and Asparagine Biosynthesis	Aspartate aminotransferase (EC 2.6.1.1)
Amino Acids and Derivatives	Glutamine, glutamate, aspartate, asparagine; ammonia assimilation	Glutamine, Glutamate, Aspartate and Asparagine Biosynthesis	Glutamate racemase (EC 5.1.1.3)
Amino Acids and Derivatives	Glutamine, glutamate, aspartate, asparagine; ammonia assimilation	Glutamine, Glutamate, Aspartate and Asparagine Biosynthesis	Asparagine synthetase [glutamine-hydrolyzing] (EC 6.3.5.4)
Amino Acids and Derivatives	Glutamine, glutamate, aspartate, asparagine; ammonia assimilation	Glutamine, Glutamate, Aspartate and Asparagine Biosynthesis	Glutamine synthetase type I (EC 6.3.1.2)
Amino Acids and Derivatives	Glutamine, glutamate, aspartate, asparagine; ammonia assimilation	Glutamine, Glutamate, Aspartate and Asparagine Biosynthesis	NADP-specific glutamate dehydrogenase (EC 1.4.1.4)
Amino Acids and Derivatives	Glutamine, glutamate, aspartate, asparagine; ammonia assimilation	Glutamine, Glutamate, Aspartate and Asparagine Biosynthesis	Aspartate ammonia-lyase (EC 4.3.1.1)
Amino Acids and Derivatives	Glutamine, glutamate, aspartate, asparagine; ammonia assimilation	Glutamine, Glutamate, Aspartate and Asparagine Biosynthesis	Aspartate racemase (EC 5.1.1.13)
Amino Acids and Derivatives	Glutamine, glutamate, aspartate, asparagine; ammonia assimilation	Glutamate dehydrogenases	NADP-specific glutamate dehydrogenase (EC 1.4.1.4)
Amino Acids and Derivatives	Glutamine, glutamate, aspartate, asparagine; ammonia assimilation	Glutamine synthetases	Glutamine synthetase type I (EC 6.3.1.2)
Amino Acids and Derivatives	Histidine Metabolism	Histidine Biosynthesis	Phosphoribosylformimino-5-aminoimidazole carboxamide ribotide isomerase (EC 5.3.1.16)
Amino Acids and Derivatives	Histidine Metabolism	Histidine Biosynthesis	Phosphoribosyl-ATP pyrophosphatase (EC 3.6.1.31)
Amino Acids and Derivatives	Histidine Metabolism	Histidine Biosynthesis	Histidinol-phosphate aminotransferase (EC 2.6.1.9)
Amino Acids and Derivatives	Histidine Metabolism	Histidine Biosynthesis	Imidazoleglycerol-phosphate dehydratase (EC 4.2.1.19)
Amino Acids and Derivatives	Histidine Metabolism	Histidine Biosynthesis	ATP phosphoribosyltransferase regulatory subunit (EC 2.4.2.17)
Amino Acids and Derivatives	Histidine Metabolism	Histidine Biosynthesis	Phosphoribosyl-AMP cyclohydrolase (EC 3.5.4.19)
Amino Acids and Derivatives	Histidine Metabolism	Histidine Biosynthesis	Histidinol dehydrogenase (EC 1.1.1.23)
Amino Acids and Derivatives	Histidine Metabolism	Histidine Biosynthesis	Histidinol-phosphatase (EC 3.1.3.15)
Amino Acids and Derivatives	Arginine; urea cycle, polyamines	Arginine Deiminase Pathway	Arginine pathway regulatory protein ArgR, repressor of arg regulon
Amino Acids and Derivatives	Arginine; urea cycle, polyamines	Arginine Deiminase Pathway	Ornithine carbamoyltransferase (EC 2.1.3.3)
Amino Acids and Derivatives	Lysine, threonine, methionine, and cysteine	S-methylmethionine	Homocysteine S-methyltransferase (EC 2.1.1.10)
Amino Acids and Derivatives	Lysine, threonine, methionine, and cysteine	S-methylmethionine	S-methylmethionine permease
Amino Acids and Derivatives	Lysine, threonine, methionine, and cysteine	Methionine Degradation	Methionine ABC transporter substrate-binding protein
Amino Acids and Derivatives	Lysine, threonine, methionine, and cysteine	Methionine Degradation	Methionine ABC transporter ATP-binding protein
Amino Acids and Derivatives	Lysine, threonine, methionine, and cysteine	Methionine Degradation	S-adenosylmethionine synthetase (EC 2.5.1.6)
Amino Acids and Derivatives	Lysine, threonine, methionine, and cysteine	Methionine Degradation	Cystathionine gamma-lyase (EC 4.4.1.1)
Amino Acids and Derivatives	Lysine, threonine, methionine, and cysteine	Methionine Degradation	S-adenosylhomocysteine nucleosidase (EC 3.2.2.9)
Amino Acids and Derivatives	Lysine, threonine, methionine, and cysteine	Methionine Degradation	Methionine ABC transporter permease protein
Amino Acids and Derivatives	Lysine, threonine, methionine, and cysteine	Methionine Degradation	S-ribosylhomocysteine lyase (EC 4.4.1.21)
Amino Acids and Derivatives	Lysine, threonine, methionine, and cysteine	Methionine Degradation	Cystathionine beta-synthase (EC 4.2.1.22)
Amino Acids and Derivatives	Lysine, threonine, methionine, and cysteine	Methionine Biosynthesis	Methionine ABC transporter ATP-binding protein
Amino Acids and Derivatives	Lysine, threonine, methionine, and cysteine	Methionine Biosynthesis	Duplicated ATPase component MtsB of energizing module of methionine-regulated ECF transporter
Amino Acids and Derivatives	Lysine, threonine, methionine, and cysteine	Methionine Biosynthesis	S-adenosylmethionine synthetase (EC 2.5.1.6)
Amino Acids and Derivatives	Lysine, threonine, methionine, and cysteine	Methionine Biosynthesis	O-succinylhomoserine sulfhydrylase (EC 2.5.1.48)
Amino Acids and Derivatives	Lysine, threonine, methionine, and cysteine	Methionine Biosynthesis	Cystathionine gamma-lyase (EC 4.4.1.1)
Amino Acids and Derivatives	Lysine, threonine, methionine, and cysteine	Methionine Biosynthesis	Serine acetyltransferase (EC 2.3.1.30)
Amino Acids and Derivatives	Lysine, threonine, methionine, and cysteine	Methionine Biosynthesis	Homoserine kinase (EC 2.7.1.39)
Amino Acids and Derivatives	Lysine, threonine, methionine, and cysteine	Methionine Biosynthesis	Homoserine O-succinyltransferase (EC 2.3.1.46)
Amino Acids and Derivatives	Lysine, threonine, methionine, and cysteine	Methionine Biosynthesis	5-methyltetrahydropteroyltriglutamate--homocysteine methyltransferase (EC 2.1.1.14)
Amino Acids and Derivatives	Lysine, threonine, methionine, and cysteine	Methionine Biosynthesis	O-acetylhomoserine sulfhydrylase (EC 2.5.1.49)
Amino Acids and Derivatives	Lysine, threonine, methionine, and cysteine	Methionine Biosynthesis	S-ribosylhomocysteine lyase (EC 4.4.1.21)
Amino Acids and Derivatives	Lysine, threonine, methionine, and cysteine	Methionine Biosynthesis	Transmembrane component MtsC of energizing module of methionine-regulated ECF transporter
Amino Acids and Derivatives	Lysine, threonine, methionine, and cysteine	Methionine Biosynthesis	5,10-methylenetetrahydrofolate reductase (EC 1.5.1.20)
Amino Acids and Derivatives	Lysine, threonine, methionine, and cysteine	Methionine Biosynthesis	Cystathionine beta-synthase (EC 4.2.1.22)
Amino Acids and Derivatives	Lysine, threonine, methionine, and cysteine	Methionine Biosynthesis	Homocysteine S-methyltransferase (EC 2.1.1.10)
Amino Acids and Derivatives	Lysine, threonine, methionine, and cysteine	Methionine Biosynthesis	Homoserine dehydrogenase (EC 1.1.1.3)
Amino Acids and Derivatives	Lysine, threonine, methionine, and cysteine	Methionine Biosynthesis	Methionine ABC transporter substrate-binding protein
Amino Acids and Derivatives	Lysine, threonine, methionine, and cysteine	Methionine Biosynthesis	Cystathionine gamma-synthase (EC 2.5.1.48)
Amino Acids and Derivatives	Lysine, threonine, methionine, and cysteine	Methionine Biosynthesis	S-adenosylhomocysteine nucleosidase (EC 3.2.2.9)
Amino Acids and Derivatives	Lysine, threonine, methionine, and cysteine	Methionine Biosynthesis	Methionine ABC transporter permease protein
Amino Acids and Derivatives	Lysine, threonine, methionine, and cysteine	Methionine Biosynthesis	Substrate-specific component MtsA of methionine-regulated ECF transporter
Amino Acids and Derivatives	Lysine, threonine, methionine, and cysteine	Threonine and Homoserine Biosynthesis	Homoserine dehydrogenase (EC 1.1.1.3)
Amino Acids and Derivatives	Lysine, threonine, methionine, and cysteine	Threonine and Homoserine Biosynthesis	Aspartate-semialdehyde dehydrogenase (EC 1.2.1.11)
Amino Acids and Derivatives	Lysine, threonine, methionine, and cysteine	Threonine and Homoserine Biosynthesis	Aspartate aminotransferase (EC 2.6.1.1)
Amino Acids and Derivatives	Lysine, threonine, methionine, and cysteine	Threonine and Homoserine Biosynthesis	Threonine synthase (EC 4.2.3.1)
Amino Acids and Derivatives	Lysine, threonine, methionine, and cysteine	Threonine and Homoserine Biosynthesis	Homoserine kinase (EC 2.7.1.39)
Amino Acids and Derivatives	Lysine, threonine, methionine, and cysteine	Threonine and Homoserine Biosynthesis	Aspartokinase (EC 2.7.2.4)
Amino Acids and Derivatives	Lysine, threonine, methionine, and cysteine	Lysine Biosynthesis DAP Pathway, GJO scratch	Diaminopimelate decarboxylase (EC 4.1.1.20)
Amino Acids and Derivatives	Lysine, threonine, methionine, and cysteine	Lysine Biosynthesis DAP Pathway, GJO scratch	N-acetyl-L,L-diaminopimelate deacetylase (EC 3.5.1.47)
Amino Acids and Derivatives	Lysine, threonine, methionine, and cysteine	Lysine Biosynthesis DAP Pathway, GJO scratch	Diaminopimelate epimerase (EC 5.1.1.7)
Amino Acids and Derivatives	Lysine, threonine, methionine, and cysteine	Lysine Biosynthesis DAP Pathway, GJO scratch	Aspartate-semialdehyde dehydrogenase (EC 1.2.1.11)
Amino Acids and Derivatives	Lysine, threonine, methionine, and cysteine	Lysine Biosynthesis DAP Pathway, GJO scratch	2,3,4,5-tetrahydropyridine-2,6-dicarboxylate N-acetyltransferase (EC 2.3.1.89)
Amino Acids and Derivatives	Lysine, threonine, methionine, and cysteine	Lysine Biosynthesis DAP Pathway, GJO scratch	4-hydroxy-tetrahydrodipicolinate reductase (EC 1.17.1.8)
Amino Acids and Derivatives	Lysine, threonine, methionine, and cysteine	Lysine Biosynthesis DAP Pathway, GJO scratch	Aspartokinase (EC 2.7.2.4)
Amino Acids and Derivatives	Lysine, threonine, methionine, and cysteine	Lysine Biosynthesis DAP Pathway, GJO scratch	4-hydroxy-tetrahydrodipicolinate synthase (EC 4.3.3.7)
Amino Acids and Derivatives	Lysine, threonine, methionine, and cysteine	Lysine Biosynthesis DAP Pathway	Diaminopimelate decarboxylase (EC 4.1.1.20)
Amino Acids and Derivatives	Lysine, threonine, methionine, and cysteine	Lysine Biosynthesis DAP Pathway	N-acetyl-L,L-diaminopimelate deacetylase (EC 3.5.1.47)
Amino Acids and Derivatives	Lysine, threonine, methionine, and cysteine	Lysine Biosynthesis DAP Pathway	Diaminopimelate epimerase (EC 5.1.1.7)
Amino Acids and Derivatives	Lysine, threonine, methionine, and cysteine	Lysine Biosynthesis DAP Pathway	Aspartate-semialdehyde dehydrogenase (EC 1.2.1.11)
Amino Acids and Derivatives	Lysine, threonine, methionine, and cysteine	Lysine Biosynthesis DAP Pathway	2,3,4,5-tetrahydropyridine-2,6-dicarboxylate N-acetyltransferase (EC 2.3.1.89)
Amino Acids and Derivatives	Lysine, threonine, methionine, and cysteine	Lysine Biosynthesis DAP Pathway	4-hydroxy-tetrahydrodipicolinate reductase (EC 1.17.1.8)
Amino Acids and Derivatives	Lysine, threonine, methionine, and cysteine	Lysine Biosynthesis DAP Pathway	Aspartokinase (EC 2.7.2.4)
Amino Acids and Derivatives	Lysine, threonine, methionine, and cysteine	Lysine Biosynthesis DAP Pathway	4-hydroxy-tetrahydrodipicolinate synthase (EC 4.3.3.7)
Amino Acids and Derivatives	Aromatic amino acids and derivatives	Common Pathway For Synthesis of Aromatic Compounds (DAHP synthase to chorismate)	Shikimate kinase I (EC 2.7.1.71)
Amino Acids and Derivatives	Aromatic amino acids and derivatives	Common Pathway For Synthesis of Aromatic Compounds (DAHP synthase to chorismate)	2-keto-3-deoxy-D-arabino-heptulosonate-7-phosphate synthase I beta (EC 2.5.1.54)
Amino Acids and Derivatives	Aromatic amino acids and derivatives	Common Pathway For Synthesis of Aromatic Compounds (DAHP synthase to chorismate)	Shikimate/quinate 5-dehydrogenase I beta (EC 1.1.1.282)
Amino Acids and Derivatives	Aromatic amino acids and derivatives	Common Pathway For Synthesis of Aromatic Compounds (DAHP synthase to chorismate)	3-dehydroquinate synthase (EC 4.2.3.4)
Amino Acids and Derivatives	Aromatic amino acids and derivatives	Common Pathway For Synthesis of Aromatic Compounds (DAHP synthase to chorismate)	Chorismate synthase (EC 4.2.3.5)
Amino Acids and Derivatives	Aromatic amino acids and derivatives	Common Pathway For Synthesis of Aromatic Compounds (DAHP synthase to chorismate)	3-dehydroquinate dehydratase I (EC 4.2.1.10)
Amino Acids and Derivatives	Aromatic amino acids and derivatives	Chorismate: Intermediate for synthesis of Tryptophan, PAPA antibiotics, PABA, 3-hydroxyanthranilate and more.	Phosphoribosylformimino-5-aminoimidazole carboxamide ribotide isomerase (EC 5.3.1.16)
Amino Acids and Derivatives	Aromatic amino acids and derivatives	Chorismate: Intermediate for synthesis of Tryptophan, PAPA antibiotics, PABA, 3-hydroxyanthranilate and more.	Tryptophan synthase alpha chain (EC 4.2.1.20)
Amino Acids and Derivatives	Aromatic amino acids and derivatives	Chorismate: Intermediate for synthesis of Tryptophan, PAPA antibiotics, PABA, 3-hydroxyanthranilate and more.	Anthranilate phosphoribosyltransferase (EC 2.4.2.18)
Amino Acids and Derivatives	Aromatic amino acids and derivatives	Chorismate: Intermediate for synthesis of Tryptophan, PAPA antibiotics, PABA, 3-hydroxyanthranilate and more.	Tryptophan synthase beta chain (EC 4.2.1.20)
Amino Acids and Derivatives	Aromatic amino acids and derivatives	Chorismate: Intermediate for synthesis of Tryptophan, PAPA antibiotics, PABA, 3-hydroxyanthranilate and more.	Indole-3-glycerol phosphate synthase (EC 4.1.1.48)
Amino Acids and Derivatives	Aromatic amino acids and derivatives	Chorismate: Intermediate for synthesis of Tryptophan, PAPA antibiotics, PABA, 3-hydroxyanthranilate and more.	Isochorismatase (EC 3.3.2.1)
Amino Acids and Derivatives	Aromatic amino acids and derivatives	Chorismate: Intermediate for synthesis of Tryptophan, PAPA antibiotics, PABA, 3-hydroxyanthranilate and more.	Anthranilate synthase, aminase component (EC 4.1.3.27)
Amino Acids and Derivatives	Aromatic amino acids and derivatives	Chorismate: Intermediate for synthesis of Tryptophan, PAPA antibiotics, PABA, 3-hydroxyanthranilate and more.	Phosphoribosylanthranilate isomerase (EC 5.3.1.24)
Amino Acids and Derivatives	Aromatic amino acids and derivatives	Phenylalanine and Tyrosine Branches from Chorismate	Prephenate dehydrogenase (EC 1.3.1.12)
Amino Acids and Derivatives	Aromatic amino acids and derivatives	Tryptophan synthesis	Tryptophan synthase alpha chain (EC 4.2.1.20)
Amino Acids and Derivatives	Aromatic amino acids and derivatives	Tryptophan synthesis	Anthranilate phosphoribosyltransferase (EC 2.4.2.18)
Amino Acids and Derivatives	Aromatic amino acids and derivatives	Tryptophan synthesis	Tryptophan synthase beta chain (EC 4.2.1.20)
Amino Acids and Derivatives	Aromatic amino acids and derivatives	Tryptophan synthesis	Indole-3-glycerol phosphate synthase (EC 4.1.1.48)
Amino Acids and Derivatives	Aromatic amino acids and derivatives	Tryptophan synthesis	Anthranilate synthase, aminase component (EC 4.1.3.27)
Amino Acids and Derivatives	Aromatic amino acids and derivatives	Tryptophan synthesis	Phosphoribosylanthranilate isomerase (EC 5.3.1.24)
Amino Acids and Derivatives	Proline and 4-hydroxyproline	Proline Synthesis	Pyrroline-5-carboxylate reductase (EC 1.5.1.2)
Amino Acids and Derivatives	Proline and 4-hydroxyproline	Proline Synthesis	Gamma-glutamyl phosphate reductase (EC 1.2.1.41)
Amino Acids and Derivatives	Proline and 4-hydroxyproline	Proline Synthesis	NADP-specific glutamate dehydrogenase (EC 1.4.1.4)
Amino Acids and Derivatives	Proline and 4-hydroxyproline	Proline Synthesis	Glutamate 5-kinase (EC 2.7.2.11)
Amino Acids and Derivatives	Alanine, serine, and glycine	Glycine Biosynthesis	Serine hydroxymethyltransferase (EC 2.1.2.1)
Amino Acids and Derivatives	Alanine, serine, and glycine	Alanine biosynthesis	Branched-chain amino acid aminotransferase (EC 2.6.1.42)
Amino Acids and Derivatives	Alanine, serine, and glycine	Alanine biosynthesis	Cysteine desulfurase (EC 2.8.1.7)
Amino Acids and Derivatives	Alanine, serine, and glycine	Alanine biosynthesis	Alanine racemase (EC 5.1.1.1)
Amino Acids and Derivatives	Alanine, serine, and glycine	Serine Biosynthesis	D-3-phosphoglycerate dehydrogenase (EC 1.1.1.95)
Amino Acids and Derivatives	Alanine, serine, and glycine	Serine Biosynthesis	Serine hydroxymethyltransferase (EC 2.1.2.1)
Amino Acids and Derivatives	Alanine, serine, and glycine	Serine Biosynthesis	Phosphoserine aminotransferase (EC 2.6.1.52)
Amino Acids and Derivatives	Alanine, serine, and glycine	Glycine and Serine Utilization	D-serine/D-alanine/glycine transporter
Amino Acids and Derivatives	Alanine, serine, and glycine	Glycine and Serine Utilization	D-3-phosphoglycerate dehydrogenase (EC 1.1.1.95)
Amino Acids and Derivatives	Alanine, serine, and glycine	Glycine and Serine Utilization	L-serine dehydratase, alpha subunit (EC 4.3.1.17)
Amino Acids and Derivatives	Alanine, serine, and glycine	Glycine and Serine Utilization	L-serine dehydratase, beta subunit (EC 4.3.1.17)
Amino Acids and Derivatives	Alanine, serine, and glycine	Glycine and Serine Utilization	Cystathionine gamma-lyase (EC 4.4.1.1)
Amino Acids and Derivatives	Alanine, serine, and glycine	Glycine and Serine Utilization	Serine hydroxymethyltransferase (EC 2.1.2.1)
Amino Acids and Derivatives	Alanine, serine, and glycine	Glycine and Serine Utilization	Seryl-tRNA synthetase (EC 6.1.1.11)
Amino Acids and Derivatives	Alanine, serine, and glycine	Glycine and Serine Utilization	Serine transporter
Amino Acids and Derivatives	Alanine, serine, and glycine	Glycine and Serine Utilization	Phosphoserine aminotransferase (EC 2.6.1.52)
Amino Acids and Derivatives	Alanine, serine, and glycine	Glycine and Serine Utilization	Glycine cleavage system H protein
Amino Acids and Derivatives	Alanine, serine, and glycine	Glycine and Serine Utilization	Cystathionine beta-synthase (EC 4.2.1.22)
Amino Acids and Derivatives	Alanine, serine, and glycine	Glycine and Serine Utilization	Glycerate kinase (EC 2.7.1.31)
Sulfur Metabolism	Sulfur Metabolism - no subcategory	Thioredoxin-disulfide reductase	Thiol peroxidase, Tpx-type (EC 1.11.1.15)
Sulfur Metabolism	Sulfur Metabolism - no subcategory	Thioredoxin-disulfide reductase	Thioredoxin reductase (EC 1.8.1.9)
Phosphorus Metabolism	Phosphorus Metabolism - no subcategory	Polyphosphate	Polyphosphate kinase (EC 2.7.4.1)
Phosphorus Metabolism	Phosphorus Metabolism - no subcategory	Polyphosphate	Exopolyphosphatase (EC 3.6.1.11)
Phosphorus Metabolism	Phosphorus Metabolism - no subcategory	Phosphonate metabolism	Phosphonate ABC transporter permease protein phnE2 (TC 3.A.1.9.1)
Phosphorus Metabolism	Phosphorus Metabolism - no subcategory	Phosphonate metabolism	2-aminoethylphosphonate:pyruvate aminotransferase (EC 2.6.1.37)
Phosphorus Metabolism	Phosphorus Metabolism - no subcategory	Phosphonate metabolism	Phosphonoacetaldehyde hydrolase (EC 3.11.1.1)
Carbohydrates	Central carbohydrate metabolism	Pyruvate metabolism II: acetyl-CoA, acetogenesis from pyruvate	Acetaldehyde dehydrogenase (EC 1.2.1.10)
Carbohydrates	Central carbohydrate metabolism	Pyruvate metabolism II: acetyl-CoA, acetogenesis from pyruvate	Dihydrolipoamide dehydrogenase of pyruvate dehydrogenase complex (EC 1.8.1.4)
Carbohydrates	Central carbohydrate metabolism	Pyruvate metabolism II: acetyl-CoA, acetogenesis from pyruvate	Pyruvate dehydrogenase E1 component alpha subunit (EC 1.2.4.1)
Carbohydrates	Central carbohydrate metabolism	Pyruvate metabolism II: acetyl-CoA, acetogenesis from pyruvate	NAD-dependent protein deacetylase of SIR2 family
Carbohydrates	Central carbohydrate metabolism	Pyruvate metabolism II: acetyl-CoA, acetogenesis from pyruvate	Pyruvate oxidase (EC 1.2.3.3)
Carbohydrates	Central carbohydrate metabolism	Pyruvate metabolism II: acetyl-CoA, acetogenesis from pyruvate	Aldehyde dehydrogenase (EC 1.2.1.3)
Carbohydrates	Central carbohydrate metabolism	Pyruvate metabolism II: acetyl-CoA, acetogenesis from pyruvate	Pyruvate dehydrogenase E1 component beta subunit (EC 1.2.4.1)
Carbohydrates	Central carbohydrate metabolism	Pyruvate metabolism II: acetyl-CoA, acetogenesis from pyruvate	Dihydrolipoamide acetyltransferase component of pyruvate dehydrogenase complex (EC 2.3.1.12)
Carbohydrates	Central carbohydrate metabolism	Pyruvate metabolism II: acetyl-CoA, acetogenesis from pyruvate	Acetate kinase (EC 2.7.2.1)
Carbohydrates	Central carbohydrate metabolism	Pyruvate metabolism II: acetyl-CoA, acetogenesis from pyruvate	Phosphate acetyltransferase (EC 2.3.1.8)
Carbohydrates	Central carbohydrate metabolism	Pyruvate metabolism I: anaplerotic reactions, PEP	Malolactic regulator
Carbohydrates	Central carbohydrate metabolism	Pyruvate metabolism I: anaplerotic reactions, PEP	Phosphoenolpyruvate carboxykinase [ATP] (EC 4.1.1.49)
Carbohydrates	Central carbohydrate metabolism	Pyruvate metabolism I: anaplerotic reactions, PEP	Malolactic enzyme (EC 1.-.-.-)
Carbohydrates	Central carbohydrate metabolism	Pyruvate metabolism I: anaplerotic reactions, PEP	NADP-dependent malic enzyme (EC 1.1.1.40)
Carbohydrates	Central carbohydrate metabolism	Pyruvate metabolism I: anaplerotic reactions, PEP	Pyruvate kinase (EC 2.7.1.40)
Carbohydrates	Central carbohydrate metabolism	Pyruvate metabolism I: anaplerotic reactions, PEP	Phosphoenolpyruvate synthase (EC 2.7.9.2)
Carbohydrates	Central carbohydrate metabolism	Pyruvate metabolism I: anaplerotic reactions, PEP	Malate permease
Carbohydrates	Central carbohydrate metabolism	Pyruvate Alanine Serine Interconversions	D-serine/D-alanine/glycine transporter
Carbohydrates	Central carbohydrate metabolism	Pyruvate Alanine Serine Interconversions	L-serine dehydratase, alpha subunit (EC 4.3.1.17)
Carbohydrates	Central carbohydrate metabolism	Pyruvate Alanine Serine Interconversions	Branched-chain amino acid aminotransferase (EC 2.6.1.42)
Carbohydrates	Central carbohydrate metabolism	Pyruvate Alanine Serine Interconversions	L-serine dehydratase, beta subunit (EC 4.3.1.17)
Carbohydrates	Central carbohydrate metabolism	Pyruvate Alanine Serine Interconversions	Alanine racemase (EC 5.1.1.1)
Carbohydrates	Central carbohydrate metabolism	Pyruvate Alanine Serine Interconversions	Serine transporter
Carbohydrates	Central carbohydrate metabolism	Pentose phosphate pathway	Transketolase (EC 2.2.1.1)
Carbohydrates	Central carbohydrate metabolism	Pentose phosphate pathway	Ribose-phosphate pyrophosphokinase (EC 2.7.6.1)
Carbohydrates	Central carbohydrate metabolism	Pentose phosphate pathway	Ribose 5-phosphate isomerase A (EC 5.3.1.6)
Carbohydrates	Central carbohydrate metabolism	Pentose phosphate pathway	Ribulose-phosphate 3-epimerase (EC 5.1.3.1)
Carbohydrates	Central carbohydrate metabolism	Pentose phosphate pathway	Glucose-6-phosphate 1-dehydrogenase (EC 1.1.1.49)
Carbohydrates	Central carbohydrate metabolism	Pentose phosphate pathway	6-phosphogluconate dehydrogenase, decarboxylating (EC 1.1.1.44)
Carbohydrates	Central carbohydrate metabolism	Pentose phosphate pathway	6-phosphogluconolactonase (EC 3.1.1.31)
Carbohydrates	Central carbohydrate metabolism	Pentose phosphate pathway	Xylulose-5-phosphate phosphoketolase (EC 4.1.2.9)
Carbohydrates	Central carbohydrate metabolism	Pentose phosphate pathway	Fructose-6-phosphate phosphoketolase (EC 4.1.2.22)
Carbohydrates	Central carbohydrate metabolism	Pentose phosphate pathway	Transaldolase (EC 2.2.1.2)
Carbohydrates	Central carbohydrate metabolism	Dihydroxyacetone kinases	Phosphoenolpyruvate-dihydroxyacetone phosphotransferase (EC 2.7.1.121), subunit DhaM
Carbohydrates	Central carbohydrate metabolism	Dihydroxyacetone kinases	DHA-specific IIA component
Carbohydrates	Central carbohydrate metabolism	Dihydroxyacetone kinases	Phosphoenolpyruvate-dihydroxyacetone phosphotransferase (EC 2.7.1.121), ADP-binding subunit DhaL
Carbohydrates	Central carbohydrate metabolism	Dihydroxyacetone kinases	Phosphoenolpyruvate-dihydroxyacetone phosphotransferase (EC 2.7.1.121), dihydroxyacetone binding subunit DhaK
Carbohydrates	Central carbohydrate metabolism	Glycolate, glyoxylate interconversions	Glyoxylate reductase (EC 1.1.1.26)
Carbohydrates	Central carbohydrate metabolism	Glycolate, glyoxylate interconversions	Phosphoglycolate phosphatase (EC 3.1.3.18)
Carbohydrates	Central carbohydrate metabolism	Glycolate, glyoxylate interconversions	Hydroxypyruvate reductase (EC 1.1.1.81)
Carbohydrates	Central carbohydrate metabolism	Glycolate, glyoxylate interconversions	Glyoxylate reductase (EC 1.1.1.79)
Carbohydrates	Central carbohydrate metabolism	Dehydrogenase complexes	Pyruvate dehydrogenase E1 component beta subunit (EC 1.2.4.1)
Carbohydrates	Central carbohydrate metabolism	Dehydrogenase complexes	Dihydrolipoamide acetyltransferase component of pyruvate dehydrogenase complex (EC 2.3.1.12)
Carbohydrates	Central carbohydrate metabolism	Dehydrogenase complexes	Pyruvate dehydrogenase E1 component alpha subunit (EC 1.2.4.1)
Carbohydrates	Aminosugars	Chitin and N-acetylglucosamine utilization	Glucosamine-6-phosphate deaminase (EC 3.5.99.6)
Carbohydrates	Aminosugars	Chitin and N-acetylglucosamine utilization	Chitin binding protein
Carbohydrates	Aminosugars	Chitin and N-acetylglucosamine utilization	N-acetylglucosamine-6-phosphate deacetylase (EC 3.5.1.25)
Carbohydrates	Aminosugars	Chitin and N-acetylglucosamine utilization	Predicted transcriptional regulator of N-Acetylglucosamine utilization, GntR family
Carbohydrates	Di- and oligosaccharides	Sucrose utilization	Sucrose-6-phosphate hydrolase (EC 3.2.1.26)
Carbohydrates	Di- and oligosaccharides	Sucrose utilization	Sucrose operon repressor ScrR, LacI family
Carbohydrates	Di- and oligosaccharides	Sucrose utilization	Fructokinase (EC 2.7.1.4)
Carbohydrates	Di- and oligosaccharides	Sucrose utilization	Family 13 glycosyl hydrolase, row 724
Carbohydrates	Di- and oligosaccharides	Beta-Glucoside Metabolism	Outer surface protein of unknown function, cellobiose operon
Carbohydrates	Di- and oligosaccharides	Beta-Glucoside Metabolism	6-phospho-beta-glucosidase (EC 3.2.1.86)
Carbohydrates	Di- and oligosaccharides	Beta-Glucoside Metabolism	PTS system, cellobiose-specific IIC component (EC 2.7.1.69)
Carbohydrates	Di- and oligosaccharides	Beta-Glucoside Metabolism	Beta-glucoside bgl operon antiterminator, BglG family
Carbohydrates	Di- and oligosaccharides	Beta-Glucoside Metabolism	Cellobiose phosphotransferase system YdjC-like protein
Carbohydrates	Di- and oligosaccharides	Lactose and Galactose Uptake and Utilization	UDP-glucose 4-epimerase (EC 5.1.3.2)
Carbohydrates	Di- and oligosaccharides	Lactose and Galactose Uptake and Utilization	Galactose operon repressor, GalR-LacI family of transcriptional regulators
Carbohydrates	Di- and oligosaccharides	Lactose and Galactose Uptake and Utilization	Lactose and galactose permease, GPH translocator family
Carbohydrates	Di- and oligosaccharides	Lactose and Galactose Uptake and Utilization	Galactose-1-phosphate uridylyltransferase (EC 2.7.7.10)
Carbohydrates	Di- and oligosaccharides	Lactose and Galactose Uptake and Utilization	Galactokinase (EC 2.7.1.6)
Carbohydrates	Di- and oligosaccharides	Lactose and Galactose Uptake and Utilization	Aldose 1-epimerase (EC 5.1.3.3)
Carbohydrates	One-carbon Metabolism	Serine-glyoxylate cycle	Formate--tetrahydrofolate ligase (EC 6.3.4.3)
Carbohydrates	One-carbon Metabolism	Serine-glyoxylate cycle	Phosphoenolpyruvate carboxykinase [ATP] (EC 4.1.1.49)
Carbohydrates	One-carbon Metabolism	Serine-glyoxylate cycle	5-formyltetrahydrofolate cyclo-ligase (EC 6.3.3.2)
Carbohydrates	One-carbon Metabolism	Serine-glyoxylate cycle	Serine hydroxymethyltransferase (EC 2.1.2.1)
Carbohydrates	One-carbon Metabolism	Serine-glyoxylate cycle	Methylenetetrahydrofolate dehydrogenase (NADP+) (EC 1.5.1.5)
Carbohydrates	One-carbon Metabolism	Serine-glyoxylate cycle	5,10-methylenetetrahydrofolate reductase (EC 1.5.1.20)
Carbohydrates	One-carbon Metabolism	Serine-glyoxylate cycle	Methenyltetrahydrofolate cyclohydrolase (EC 3.5.4.9)
Carbohydrates	One-carbon Metabolism	Serine-glyoxylate cycle	Enolase (EC 4.2.1.11)
Carbohydrates	One-carbon Metabolism	Serine-glyoxylate cycle	Glycerate kinase (EC 2.7.1.31)
Carbohydrates	One-carbon Metabolism	One-carbon metabolism by tetrahydropterines	Formate--tetrahydrofolate ligase (EC 6.3.4.3)
Carbohydrates	One-carbon Metabolism	One-carbon metabolism by tetrahydropterines	5-formyltetrahydrofolate cyclo-ligase (EC 6.3.3.2)
Carbohydrates	One-carbon Metabolism	One-carbon metabolism by tetrahydropterines	Methylenetetrahydrofolate dehydrogenase (NADP+) (EC 1.5.1.5)
Carbohydrates	One-carbon Metabolism	One-carbon metabolism by tetrahydropterines	5,10-methylenetetrahydrofolate reductase (EC 1.5.1.20)
Carbohydrates	One-carbon Metabolism	One-carbon metabolism by tetrahydropterines	Methenyltetrahydrofolate cyclohydrolase (EC 3.5.4.9)
Carbohydrates	Organic acids	Glycerate metabolism	Hydroxypyruvate reductase (EC 1.1.1.81)
Carbohydrates	Organic acids	Glycerate metabolism	2-hydroxy-3-oxopropionate reductase (EC 1.1.1.60)
Carbohydrates	Organic acids	Glycerate metabolism	Pyruvate kinase (EC 2.7.1.40)
Carbohydrates	Organic acids	Glycerate metabolism	Glycerate kinase (EC 2.7.1.31)
Carbohydrates	Organic acids	Citrate Metabolism, Transport, and Regulation	Citrate lyase transcriptional regulator CitI
Carbohydrates	Organic acids	Citrate Metabolism, Transport, and Regulation	Apo-citrate lyase phosphoribosyl-dephospho-CoA transferase (EC 2.7.7.61)
Carbohydrates	Organic acids	Citrate Metabolism, Transport, and Regulation	[Citrate [pro-3S]-lyase] ligase (EC 6.2.1.22)
Carbohydrates	Organic acids	Citrate Metabolism, Transport, and Regulation	Citrate lyase beta chain (EC 4.1.3.6)
Carbohydrates	Organic acids	Citrate Metabolism, Transport, and Regulation	Citrate lyase alpha chain (EC 4.1.3.6)
Carbohydrates	Organic acids	Alpha-acetolactate operon	Alpha-acetolactate decarboxylase (EC 4.1.1.5)
Carbohydrates	Organic acids	Alpha-acetolactate operon	Acetolactate synthase, catabolic (EC 2.2.1.6)
Carbohydrates	Fermentation	Fermentations: Mixed acid	D-lactate dehydrogenase (EC 1.1.1.28)
Carbohydrates	Fermentation	Fermentations: Mixed acid	Alcohol dehydrogenase (EC 1.1.1.1)
Carbohydrates	Fermentation	Fermentations: Mixed acid	Acetaldehyde dehydrogenase (EC 1.2.1.10)
Carbohydrates	Fermentation	Fermentations: Mixed acid	Pyruvate formate-lyase activating enzyme (EC 1.97.1.4)
Carbohydrates	Fermentation	Fermentations: Mixed acid	L-lactate dehydrogenase (EC 1.1.1.27)
Carbohydrates	Fermentation	Fermentations: Mixed acid	Pyruvate formate-lyase (EC 2.3.1.54)
Carbohydrates	Fermentation	Fermentations: Mixed acid	Acetate kinase (EC 2.7.2.1)
Carbohydrates	Fermentation	Fermentations: Mixed acid	Phosphate acetyltransferase (EC 2.3.1.8)
Carbohydrates	Fermentation	Fermentations: Lactate	D-lactate dehydrogenase (EC 1.1.1.28)
Carbohydrates	Fermentation	Fermentations: Lactate	L-lactate dehydrogenase (EC 1.1.1.27)
Carbohydrates	Fermentation	Fermentations: Lactate	Acetaldehyde dehydrogenase (EC 1.2.1.10)
Carbohydrates	Fermentation	Fermentations: Lactate	Xylulose-5-phosphate phosphoketolase (EC 4.1.2.9)
Carbohydrates	Fermentation	Fermentations: Lactate	Fructose-6-phosphate phosphoketolase (EC 4.1.2.22)
Carbohydrates	Fermentation	Fermentations: Lactate	Phosphate acetyltransferase (EC 2.3.1.8)
Carbohydrates	Fermentation	Fermentations: Lactate	Acetate kinase (EC 2.7.2.1)
Carbohydrates	Fermentation	Acetoin, butanediol metabolism	Alpha-acetolactate decarboxylase (EC 4.1.1.5)
Carbohydrates	Fermentation	Acetoin, butanediol metabolism	Acetolactate synthase, catabolic (EC 2.2.1.6)
Carbohydrates	Sugar alcohols	Glycerol and Glycerol-3-phosphate Uptake and Utilization	Glycerol-3-phosphate ABC transporter, permease protein UgpE (TC 3.A.1.1.3)
Carbohydrates	Sugar alcohols	Glycerol and Glycerol-3-phosphate Uptake and Utilization	Glycerol-3-phosphate dehydrogenase [NAD(P)+] (EC 1.1.1.94)
Carbohydrates	Sugar alcohols	Glycerol and Glycerol-3-phosphate Uptake and Utilization	Glycerol-3-phosphate ABC transporter, permease protein UgpA (TC 3.A.1.1.3)
Carbohydrates	Sugar alcohols	Glycerol and Glycerol-3-phosphate Uptake and Utilization	Glycerol kinase (EC 2.7.1.30)
Carbohydrates	Sugar alcohols	Glycerol and Glycerol-3-phosphate Uptake and Utilization	Alpha-glycerophosphate oxidase (EC 1.1.3.21)
Carbohydrates	Sugar alcohols	Glycerol and Glycerol-3-phosphate Uptake and Utilization	GlpG protein (membrane protein of glp regulon)
Carbohydrates	Sugar alcohols	Glycerol and Glycerol-3-phosphate Uptake and Utilization	Glycerol-3-phosphate ABC transporter, periplasmic glycerol-3-phosphate-binding protein (TC 3.A.1.1.3)
Carbohydrates	Sugar alcohols	Glycerol and Glycerol-3-phosphate Uptake and Utilization	Glycerophosphoryl diester phosphodiesterase (EC 3.1.4.46)
Carbohydrates	Sugar alcohols	Glycerol and Glycerol-3-phosphate Uptake and Utilization	Glycerol uptake facilitator protein
Carbohydrates	Sugar alcohols	Glycerol and Glycerol-3-phosphate Uptake and Utilization	Glycerol-3-phosphate ABC transporter, ATP-binding protein UgpC (TC 3.A.1.1.3)
Carbohydrates	Carbohydrates - no subcategory	VC0266	Hypothetical protein VC0266 (sugar utilization related?)
Carbohydrates	Polysaccharides	Glycogen metabolism	Glucose-1-phosphate adenylyltransferase (EC 2.7.7.27)
Carbohydrates	Polysaccharides	Glycogen metabolism	1,4-alpha-glucan (glycogen) branching enzyme, GH-13-type (EC 2.4.1.18)
Carbohydrates	Polysaccharides	Glycogen metabolism	Glycogen biosynthesis protein GlgD, glucose-1-phosphate adenylyltransferase family
Carbohydrates	Polysaccharides	Glycogen metabolism	Glycogen phosphorylase (EC 2.4.1.1)
Carbohydrates	Polysaccharides	Glycogen metabolism	Glycogen synthase, ADP-glucose transglucosylase (EC 2.4.1.21)
Carbohydrates	Monosaccharides	Mannose Metabolism	Mannose-6-phosphate isomerase (EC 5.3.1.8)
Carbohydrates	Monosaccharides	Mannose Metabolism	Putative regulator of the mannose operon, ManO
Carbohydrates	Monosaccharides	D-ribose utilization	Putative ribose uptake protein RbsU, GRP transporter family (TC 2.A.7.5)
Carbohydrates	Monosaccharides	D-ribose utilization	Ribose operon repressor
Carbohydrates	Monosaccharides	D-ribose utilization	Ribokinase (EC 2.7.1.15)
Carbohydrates	Monosaccharides	D-ribose utilization	Ribose 5-phosphate isomerase A (EC 5.3.1.6)
Carbohydrates	Monosaccharides	D-gluconate and ketogluconates metabolism	Gluconate permease, Bsu4004 homolog
Carbohydrates	Monosaccharides	D-gluconate and ketogluconates metabolism	6-phosphogluconate dehydrogenase, decarboxylating (EC 1.1.1.44)
Carbohydrates	Monosaccharides	D-gluconate and ketogluconates metabolism	Gluconokinase (EC 2.7.1.12)
Carbohydrates	Monosaccharides	Fructose utilization	Phosphotransferase system, phosphocarrier protein HPr
Carbohydrates	Monosaccharides	Fructose utilization	Phosphoenolpyruvate-protein phosphotransferase of PTS system (EC 2.7.3.9)
Carbohydrates	Monosaccharides	Fructose utilization	Transcriptional repressor of the fructose operon, DeoR family
Carbohydrates	Monosaccharides	Fructose utilization	Transaldolase (EC 2.2.1.2)
Carbohydrates	Monosaccharides	Fructose utilization	1-phosphofructokinase (EC 2.7.1.56)
Carbohydrates	Monosaccharides	Fructose utilization	Fructokinase (EC 2.7.1.4)

## Sheet: Table S2
Table S2: Phage Site Prediction
CDS Position	BLAST Hit	E-Value	Sequence
Hit Against Virus and Prophage Database
complement(957960..959117)	PROPHAGE_Oceano_HTE831: integrase; PP_00965; phage(gi23097608)	1.64e-74	MATIKKYQDKDGNTRYQFQVYLGVDPLTGKKKNTRRRGFKTKKEAQIVLSRLELDIYNHGLPTKNDNTIFKDIYQLWFTQYKQTVKESTWVTTQRLFRLHILPIFSDYRIAKISIKDCQKAINQWFNAGLVKYHTLMNYVAKVLDYAINIDLIGENPAKRVIVPVNKNDRSRKNLENYFDKAELQHFFECLNDDDNTPQASVFFRLAAFTGMRKSEMLCLEWSDIDFSNHTIRVNKTQSRGDGARLLVQAPKTARSNRTVYLDPTTIKILQHWQVDQKEWLLRFGFNINQGNHYVFANENNEMFQPSKPRKWLEHTLTKYDLKHVTVHAFRHTYATLAFEAHASIKSVQDQLGHSSYRTTLDIYTAVTAKQKNEATEKLANYLNF
complement(959196..959849)	PHAGE_Faecal_FP_Taranis_NC_047914: hypothetical protein; PP_00966; phage(gi100084)	9.29e-09	VIVLIKIDLKKLAKSKGFTLTDISKATGISMNTLSVLGRNVSTGIQFDTLDKICRFLTCTPNDIIKVLPDDYIVQVPAQKSKNDAIYAIGVKETVIHKSIVENSMYNADAEENIFHVKLISYTDNEAIFFVGLPVGSGFLNTPTESEEKTTKWLVSLNERNRASISKQATGIYLENYWNKKIALPQKVSIVFNVPNQGSVYSFTLHEKDNHVLLEDH
959989..960168	PHAGE_Lactob_Sha1_NC_019489: prophage Lp3 protein 4-like protein; PP_00967; phage(gi418489838)	3.58e-30	MNSTDKSWLTYQQVMEELHIGSVNTVYKMINDGLKVTSIGRLKRIERKELDKYLASKTI
960665..961465	PHAGE_Lactoc_bIL310_NC_002669: hypothetical protein; PP_00969; phage(gi13095885)	1.36e-19	MKEFTTLDKAIELAQQGYAVYPLIENTKKPPKGVAGYQAATSDQNTIFAWFKKHPTYNLGLRLDLSDLLVVDIDMHEPTKNGRTSLAQLFKQGQTLPNDTYIERTANGGVHYFLKYAGAKVRKIDVWPGIDLLSDFTVIAPSEINGKPYTPLGGQTLADIKPAPRWLVDKLAGQKVNWPSEHACTTHQKKYTGRLLDEMVTGTTQGNRNAWLTKIAGRMFGVGAAPRTVYNMLSVINDSFVDPALPSKEVNVIFQSILKRESKGVH
961477..962859	PHAGE_Staphy_vB_SpsS_QT1_NC_048192: minor tail protein; PP_00970; phage(gi100055)	6.1e-79	MDLPAETREAANNVIKMQRDADWQNDFKKNSDDGIKTQSLYNIRLIMEHDEMLKGLVVFDEFSEQIVKNPQTDNSLFKKGFWNDSDDTLLRSYLEDHYNLLFSKENITDAVVTEARRKTVNPVKDRIETVEWDGQPRAERYFIDYLGAEDNHYTRTITKKWLTGLVARAYEPGVKFEIVPILEGSQGLGKSTAGKNLYPDKFNDSLKGMGKQKDDYQQLQGSWIIEVAELSAMKKTDIEGIKNFISAQSDTYRNSYGRYALPHPRKCVFIGTTNQTDYLKDATGERRFYPIKCGVNKAKLDVWHPDENYMLQVLAEAMYWFRNGEPLYLDQATMKEAKAYQMAAETVDPMRDAIEAFLAMEVPTDWENMSTGLKQSYVSDYGHHSKWLKDQVSNERKLL…
963447..963731	PHAGE_Lactob_Sha1_NC_019489: phage terminase-like protein large subunit; PP_00972; phage(gi418489802)	8.16e-05	MKIKLTDTEEKLDDQTITVASKPVKGDTLLLDNGRSVEIQSVYQDENLYADTPEYTAIVEYINGKPVSEMTDQDVVDWFNNPESGLLGDDDEEL
964049..964438	PHAGE_Staphy_Pvl108_NC_008689: phage endonuclease; PP_00973; phage(gi119443688)	1.82e-21	MAKPVKMCEHPGCRTLVAYDTRYCEKHRKATNKWRYHKRMYDSDESKYQQFYKSSAWRKLSRWFLESNPVCVQCYQDGVIRKADVVDHVIEIKDDWSRRLDESNLQPLCYRHHNRKTGLVREQRKQPTK
965502..965975	PHAGE_Strept_315.2_NC_004585: hypothetical protein; PP_00975; phage(gi28876231)	2.72e-16	MGRKVKPLASMKKHLTNDERDQRKDAEKALFDYPSLDLTPPDWLHDRALTEWQRVAPYLKANTPISELDRAMLASYCRAYATVQTCENDIRKNGLVQTNQKSGVRKPNPYVALQSQAMKDLKALANDLGMSLSSRARMELNKQKDETPEDTFEAMLS
965993..967675	PHAGE_Strept_315.2_NC_004585: hypothetical protein; PP_00976; phage(gi28876230)	5.63e-132	VLSGQVLAGQKIKWACERFKRDLSRSKEAIFPFYYDEDEAAQAVKFIELMPKTDGSRLTMQPFQKWIISELYGWREKTTGNRRYDRAFISMARKNGKTYLASGMAANGLLRERQPARNRQVLFVSNALKQAKLGYNMLSSGLRQVRKQSKYMRQRIKVQKQAITDLETDSQALALASDTSTLNGYAGTTVILDEWHEAKDRKVYNVLKSGQAQEDNSLLAVISTSGLNLNVPMHAEYDMLTDVLKGKTEADRYFVAIWELDDREEVYDQANWIKANPLFSEPHVKQRMTEKIQADVDLAIKQNNLIPILVKNFNMWLQASEDSYISADDWAAGKLAKVPDLHNRDAYIGIDLSKSNDLTAVSWLIPIGNGQFYCDSHSFVGTKYGLDSKIKRDGIDYRS…
967830..968930	PHAGE_Staphy_StB20_NC_019915: portal HK97 family; PP_00977; phage(gi431809767)	9.09e-60	MSFFVKSNTTSGTHDPVADALVSLSSNDPYTFVSAAVLRNSDIYAAINIIASDIASNPIMCDRAIFNTMINQNPNSQMDGYHFKYALAANLLLNGNSFAEILPNHTLKLIANNQLTVEQDDVSGALTYTYTPTGGNSRQIAPNNILHFKYFTKDGVSGISPLYALKDERQIQSAGNKLLTGFFTAGVHGTTVIKVHQSDLGPEAKDNIRTQFDEANTGDNAVNTIVTDDTMDISNLSLNTDVLKLVNSNDWTTRQIAKAFGLPPERLGVENDHSNQEQSGVQYLQGTLQHYFDSFTSELSFKFGHDFTFNTDKLLSLDPQTQQAQAVAGFTGGVMSRNEARAKIGLPPTDDGNIFLNLQKNGVTNS
968963..970453	PHAGE_Entero_vB_EfaS_AL2_NC_042127: minor tail protein; PP_00978; phage(gi100055)	1.48e-46	LRAQTPQSETPEDGPAENSADPQPKGSQTSKGKTISGYAIVWNSPSKDLGGFTEVVTPKALDGVDLSNVLMLNNHDYTQVLASAKAGTLTLETDDKGLHFTAQLPNTSFANDVYEEVQSGNVDSCSFGFDSDDNTDEWTKDDGGNITRTINQVKSLFDVSVVAVPAYDDTNVQVDTRSYEKFINQEKEPDNMAKQTIIDPNGNENKTGIPAFEQYVRTHGETRDGLKTDGVSAVIPKELITPVFQLKQSNYNLAQYATVKQVSSGSGTYPIATSRQSAVLATKEELAEIADVNANMFTEVPFDVKTRAGKIALSNEVVEDAEVDIVSEVKNQLQQLVDNTDNTQIMSLLTGTSFTKATATNIDDLKKIFNVTLDPALSKMWLVNQSGFNYLDTLKDSDG…
970593..970862	PHAGE_Lactob_Sha1_NC_019489: phage protein DNA packaging protein; PP_00979; phage(gi418489807)	3.65e-08	MAVTVDDIKLSLRIDVTEDDKMIKNYLDAAEDYVQTAVSGSKDVSMYKQYDFAVSLLTQFWYQNRVTDMTKTPYQVVSMIQQLRGLVTR
971044..971415	PHAGE_Lactob_PL_1_NC_022757: transcriptional regulator; PP_00980; phage(gi557308042)	9.78e-08	MRKDVKKICNLLKQYAKLKRDLTAFNQVSSPSFDGVSSHSSRNGAESRLINHVDLSYQLKEVEDALNAIDDPQYQFILHDYIIKKRFSRSEACGQLSVSVSKFNYMKNEALHAFAKFYSDLTV
complement(972780..973901)	PHAGE_Lactob_LBR48_NC_027990: putative integrase; PP_00984; phage(gi937456703)	3.7e-53	MSVTKLNNGKWQARVSYKDDDGNYKSVTHLEKRKTDAVEWETKTKNALLEGADLSRSTESLKHYFLDWIRIYKTDGVSRHTHELYMGNWRHVSAYFKDKPMSSIKRPDYQKFLNEFGRSHGIATSHKLHQQVHTAIKDAVADGILKRDFAYKAHVTGRPPKPVEEKYLTLSDYKKLRKYLIKTADYDHMTMLMMLFQLETGTRFEEAAGLTWDNLDLNNGIVHIKQQWDARRQTFRPTKGNGQADGDITIGPAYCRFMRSYRSTQKDYLELHEMKNPKNLVFWSKLGKIVGNGNANEELGRICNRLNINKVTTHAMRHTHASILILNHESLPYVQHRLRHQKLETTVNTYVHLIEEENGVSDKKATELMDEGF
complement(975753..976463)	PHAGE_Lactob_phig1e_NC_004305: hypothetical protein; PP_00987; phage(gi23455775)	2.84e-15	MGEKILGLVLTIVFGYITYRLYKNNSMKKGVRLGLTIFTSILTVSSLVGPYTESSNKATDSSTVSKADSQAFSKKASSNIEKVKEKESRSESKSSAAKVKSESKSQSASSSKSESQSESKLVESTKNKNEQKNFEKFQQDLGNTPSTTKGSITSANYDQTSETLKLTLSDEALDLQGAQLKEVVRAAWNAGNSLVDSDKPFPDDKQVVSIIIQDSAGNQLAHSSAFLHEFKYDADK
complement(976523..976936)	PHAGE_Bacill_BCJA1c_NC_006557: hypothetical protein; PP_00988; phage(gi56694873)	6.38e-11	MDRVKDIVKTIVNRYHTADPFVIAEKLNIQVEWCDFGTMPLGKNAYDNQEPIILLNNSIKHTPTQYFILGHELGHVIFHEGLIGYYTSVKHGHSKFEREADEFSVGLMGMLFIEENGHIPYSYRELSYQYGVPFDGD
complement(976948..977310)	PHAGE_Lister_A118_NC_003216: putative repressor protein; PP_00989; phage(gi16798819)	5.53e-19	MTIGKRIANLRKQKSLTQPMLADAMNVSQSTIASWESDRRSVSNDDLIKLSDYFGVTTDYLLGKNGTPKWANEKDTKDLQDFLDANEGSMTYGGEDLTEEEKQQVRVAMATIFWKRHKHD
977427..977666	PHAGE_Geobac_GBSV1_NC_008376: immunity repressor protein; PP_00990; phage(gi115334658)	1.16e-07	MKGAMILKLKYYREAMNLTQEELARHAKVSVAMVQSMENGRRKGSTDTILKLSDALNVTVDDLLRGNNMTISHKKEAAK
978218..978730	PHAGE_Lactob_LBR48_NC_027990: putative transcription regulator; PP_00993; phage(gi937456713)	1.16e-40	MKNKFAEQLSLALGRDKTLTQQQIADRTHVSPGQLSRLKSGSRSTDSQIRKSLANVINDFWLNYSGARENFGVLSFQNDRQLQGDMFSALMKQKKEQCQREGIEAEFEEAITVKPRDRTPAQQLVIERYPREYAEEISAEITDLAKKAEYAGIPMDKLQEVIDKVNQENG
979232..979762	PHAGE_Lactob_Sha1_NC_019489: phage protein; PP_00996; phage(gi418489843)	1.41e-72	MDAMLKEELRTVTERENEGFKIDSLEKADWALKKLKAIQAHDDEIGQVAKNNIDQAIAWRDRELDKNQANREYFEGLLTDYLRDQRLVDKKFKIDTPNGRVSTRKNPAGLAYDEKMVLNSLHNQGMSQYIKVKESIDKVDLKKAGRMVGDKFVMEDGEIIAGITEKPATEKVTFKY
979774..980739	PHAGE_Geobac_E2_NC_009552: hypothetical protein; PP_00997; phage(gi148747763)	2.15e-84	MSEAIAKAENQTNSLSLIMGTDQNKMASELQAISNFQTMVQKQLKNGQDFGVVPGTQKPTLLKPGAEKIQMLMGVTSEYNVIDKVENYKDGYFDYTVKCVLYKSGMQLTEGLGSANTKESKYVSRDGFSMKNTVLKMAKKRAQVDATLTIASLSNVFTQDVEDMQNFNQRENNETMTYDEAFNLKLNFGKNKGKSMGDVMNENRGYIEWLAENAQKPEFKTAAKLLLAGKQQPETDDKAHEDLDPTNIIASSKQTSEIANLAGELATQTKNGTPLSVTNEVIQQIVPDWKGTDDDWKNLTIAQAEDAKSQLQGLLAAFDKK
980820..981752	PHAGE_Lactob_iLp84_NC_028783: DnaD domain-containing protein; PP_00998; phage(gi971743106)	1.97e-77	MARPVKEGLDYFPLDVDFAVNDKTEAIMGEFGPKGVLFMIYLLSAVYQNGYYLQWNKLKQMQLANRIEGVSPELANQIVNRLIAYGTFSEELFNSAKVLTSQRIQETYEDATKRRKSQKPTKYWINVDINKDTSVVNVDINTQSKVNKSKSNKSKVNNYDDDAGVTREQVINDWTNLWGFPNGVARPEIDEWLVALKPELVAYAIQIAGEHDVQSRGALKYLRAVIKGWQQRKITTLAQAKQAIADHDKRLANANKPGGYSKPRRKEIMPKWAQSDASQADSKSNSSDDQQDDMSDEAFLAFMNSQEEAK
982033..982551	PHAGE_Lactob_phig1e_NC_004305: hypothetical protein; PP_00999; phage(gi23455787)	2.2e-52	MTETQVLVINADLPDIDHPLAMGPEPEMFKLTQHNYKSGEWPFPVRLVKPGTKVSSDAAYLASMKQDPKQGEREDVRAIRQAHKHGKHTLRELADSTAMELNRVKDLVHKYSLPLTNDYWRAEKYNNPDEVIAYQTLARLCKRIGAPEFSIRQASMSNGIVNGYYISRVPKV
982560..982928	PHAGE_Lister_A118_NC_003216: gp63; PP_01000; phage(gi16798850)	1.13e-35	VIKGELPSLNEYIKAERANRYAAAKLKKRYTALCSVYARASRNSGVEFSWPCKLKFTWYTKNNRKDADNIAFAKKFVLDGFMKAGLLGNDNRKHITGFQDEFAVDKRNPRVEIDEITEDENA
983102..983527	PHAGE_Lactob_Lpa804_NC_048134: capsid maturation protease; PP_01001; phage(gi100067)	9.87e-41	MATMIKFRAWNQIDSEYINEINAVMSLDGSHIWWDINDSGEMKYEDDPGNYKLEQFTGLKDVNGKEIYEGDIVKTWSDMSELTMEPIINEIVSEDSLGIPGMFLKPVEAHLFELCLHECWSNQFEVIGNVHENPELLEED
983824..984294	PHAGE_Lactob_PLE3_NC_031125: minor tail protein; PP_01002; phage(gi100056)	3.89e-21	MMESIFKDVDEERTIANAERVLKDYWKWRLRARRVNFNLQSPAMDGMPKSPSYGNHIEDKQVSKANDDFMANLVAKVIEAVTIDEETEKYSELLMLLYVKRYSKTKCTISLNISDKTFNKYLKQAQLMFAEIYPDGVEDLIVKKYEPEIIAHYDEE
985314..986372	PHAGE_Lactob_Lj965_NC_005355: hypothetical protein; PP_01004; phage(gi41179236)	5.32e-87	MKNDILEKKPFSDIDINDSFFDSLKEDYAGFDQWFQRKSDSGDYAYTVYQGKSVIGFMYLKDEAGIDETITPDISKYGTRLKVGTFKIDAHGTILGNRFISLILHQFVVGNYDACYVTMFDKISGLDKLFQKFGFSEFGKKNSTNETVLLREKSIKGNIYQDYPRITLAGDKYLLGIMPKFHTSLFPDAKLRTEKSFYTEDVSATNSITKVFLSNLQGLRNNDLKENDKLVIYRTSESGKVAEWNAVATSVATVVDYRNINSFDSYSDFEKFVTRYSIFSEQELYSFWNSKRYPYIIKFVYNVAFPHRIVRHDLIENCGIDREAYSGFIELSDKVFASILEEAKLNEGYVID
986431..986724	PHAGE_Lactob_Lj965_NC_005355: hypothetical protein; PP_01005; phage(gi41179237)	2.07e-23	LFKQKVTTIVVYATKPYGKVVGEFDVSNILEDAPQSIWKQTSKYAGVSKAFFDDYYYKSEKAIAIEISNFVTYSEPLTLKKFDHTIKSAPQSFMYLQ
986791..986991	PHAGE_Lactob_Sha1_NC_019489: HNH nuclease; PP_01006; phage(gi418489799)	5.29e-11	MPRMIHSKYGYEPPEWVQADARLDKWYKDKKRRAKQHGAFSLGKNKEVQHEQIRNSSAKTQFNRQT
987124..987423	PHAGE_Lactob_CL1_NC_028888: hypothetical protein; PP_01007; phage(gi971752632)	8.84e-13	MKLPAYVKISGINYTVVLKKRLEDSGDACWGLTDYPDATIYICKELSQQKQRQTLMHEMVHAMMHEAGLDNICNDEKIVNPLGNMLDNVLASNDLAKLY
987484..987993	PHAGE_Lactob_phig1e_NC_004305: putative terminase small subunit; PP_01008; phage(gi23455798)	2.72e-64	MKRKLTPKQRKFANEYIKSGNAADAARKAGYSKQTARTVGQQNLTKLDIKEYIDEQMAEIESSKIADAKEVMEFYTRVLRGEELETVVVGTADGAESIERPPTTKDKTAVAKEILKRYPGNDKLVEQQIRKLKADADIAEAKAKRSSKDNQQVVINFTDDLPDDGQQNT
988197..989495	PHAGE_Staphy_Ipla88_NC_011614: putative terminase large subunit; PP_01010; phage(gi215401206)	1.33e-136	MSTTQQFNLSLRQLIGSGYTDFWRDHHFYRVIKGSRGSKKSVTTAHNLIYRLVKYHWSNILVVRRNANTNKTSTFVECKKAINDFHLARYFKYNESLPEITYLPTGQKIIFRGLDDPLKLTSVNVLTGELCWLWVEEAYEIESFSKLQTVIESLRGNDPQVFYQVTLTFNPWNEHHWLKREFFDQKRDDAFVRTTTVRCNEFVSDEYKQRLYSLYQTNPRRAKTVVDGDWGVAEGLVFEDNIEQIEFNAMDKIQECGQTGFGLDYGFGNDPNAFVAVAVDVRNKQLWVYDEMYTYHQTTPHIAEWLKANGYERARIYADSANPERTAQLNDLEIVNADSVVKTPIEAGIDQLWQYQIHVHPKCKNLWRELNSYVFDSDRMGNTLSKPKDQDNHAIDALR…
989548..991152	PHAGE_Entero_phiFL2A_NC_013643: portal protein; PP_01011; phage(gi281416526)	1.4e-72	MPVGTYTAVSEQPLELMKIVYQFINHHQNHQVSRLQTLYDYYQANNAIKKQGDNNNPYHANNRVAAAFARYMTSIRVGYLIGNPIQLKLQDDTEVDDSQAQKFQNVLDNFITNTNADYVNQQLAKDLSITGRAYDLVYVKNGVTDLGLVRVDPEQAFVIYDDTVDHKPLVGVRYYQTGILDNQLTEHYEVYTDSQLFTFHSQGGLPQTNSPVANAVLDDTLPHFFNTVPLTEYRNNDERLGDWEPELDQLDALDKSVSMMADFQEDFNNANIVLTGKFSNMTEPKYLLDENGNKKIGQDGQPIIIEPAHPNVDPKNHMWYLEPFAASGGVGSTAKHIIQPDAKYLTKQYDAAGWSTYTNFLINEIHKYTNTPNVNDPNFASNASGVAMSYKLWGSDQER…
991155..992099	PHAGE_Entero_phiFL1A_NC_013646: phage head protein; PP_01012; phage(gi281416365)	5.37e-09	MDINKLAHALAKILDVKDPVFQQLISIIERSHHAQVKNLTYFLHKNVTWQDNADDADIKELTDAVLELKQSATPVEEQVLATLLNNLPYKTNLDVAQAQARVNVANMGLKVNKLVQAKQAEIVQQVTKLTGSGLGGYNKQLGRRALYRVAAQNEPENTSLDLIFKNANNLAIDLDNIIKFQMQNHVNPNSISKIVAKELGVAGKPNPNEDLWETAMQKRYMSTKADMERILVTESKATQTRECAKQYSNLGFTKLKIVTRDNPHVCRYCEGHDGTIVEIKDAVVGMNVPPFHPRCHCNVIPVQTDYKDVLNELD
992206..992853	PHAGE_Brocho_BL3_NC_015254: gp8; PP_01013; phage(gi327409398)	6.28e-05	MSEEPKNPETNPEGGQPSDEPVTFTDEQQAKIDELIGQQHAKWSKKLDQQQADFKKQLADTQKQAEERAKMTAEQKAEADRKQREAEMAKQNQKLATQIQEYKTKSMLLDKGISPDMLPLVMGVDEDSTSDNLGLLQKYVDSQVQAATEKLLTGKQSVTTGSNNTSPLETGTDNPWSKDGWNLTKQTEIYNTDKEQAQKLIASAQPISQSFYVGK
992870..993922	PHAGE_Entero_phiFL3A_NC_013648: coat protein; PP_01014; phage(gi281416261)	1.14e-58	MANITQLSDMKIPENWGNYLAEKSTQNNAFFTSGVVQNVPQIAALLGAGKVANMPLFKPLADDDPQVPDDTTDLLVNKITTDLAQARKLGFDQAWSATDLSAELSGADPLSAIGDQVSDYWSHVYEKLLLKTLTGVFSSVSMKGVNQLDATADKTDTTFSLKNFNKARFLLGDRYKDLAIVAVHSDVLRQLQDANLVDAKNNSTFVLNGNGNVPTSIQAPDAGDKIKGVQIVVDDSLPVSGGKYTSYLFAQGAVGYSELPVANAIETNRDPLKNHGVDYLVNRRRFVFAPQGLSWNESNFTSKHSGKAYPTMDDLADGTNWTKVYDQKLIPMAQFVTSADPIVPGSGLGH
993937..994302	PHAGE_Strept_9873_NC_047763: hypothetical protein; PP_01015; phage(gi100009)	3.85e-10	MIGTQDSYKKLENVITLLGITPTDSERKRLTLYIDHAEQAIVLYLGRAVRISGLPSGLDYIVEDLAVTKFNKFHNEGEKSHSEEGLSFQFNVNDLTPYYPDLQAWIDGQSNTTRGATAIGW
996152..996640	PHAGE_Staphy_phiJB_NC_028669: hypothetical protein; PP_01020; phage(gi966198897)	9.35e-05	MENLMIDGTTCTPKLNYAFANQVKKELSSDGRDGFDVLVDGLLDEDPDQIVNAYYYALAYFKRSQPSRDKVVEALEDTIFADDDKTNAAYSDIIQSLHADNFLARKLTSFVKGYNKILDIMQKKLESETEGSDQYNQDQLGMEQLQAQLDKLKKVLQPGTPQ
997008..1001282	PHAGE_Lactob_phiAT3_NC_005893: putative minor tail protein; PP_01022; phage(gi48697271)	9.95e-68	MDQISQGVANARQAMDEAVHAATDMGSKVSESGEKWHNYASKQKEAMDEAKANFNEYKDQVTNSSNSIREKISGLIDHLKEIPHDVVTTLKSKINDENIGIFSRKVRDVPKERSVLLRAKDKFTDMFKHLSERIKQIPKEHSLPLKVKDGFSKGFQKFNESAKKTRENGHRLRDIIEGTFVGNALYSAYDKVKDGIVAATGAGLKFDAEQQKMIATWTTLTGSAGKAKDMVQSINDLAVKTGQSVQIVDELEQGFYHLHSSKKEADDLTHAMLNMGDAVGLTGDQLMSVSQDMVHSLAQGKLTAGALNQLGMYFPMVEEKMAKFEEAHAKASGSAVANTKAVAQAQRDYVKEQTLSFEKIHYGSTITNSDLKQLAQQNIISTGEAQKFQGMLSNGQKVN…
1001435..1002013	PHAGE_Strept_5093_NC_012753: hypothetical protein; PP_01023; phage(gi238801908)	2.65e-31	MDGTIDFSDILGRRIFDNRTIEYQFKALNINYHDRKLLEQKCKRLLLIPMRQPIYDSHDLPFYWFGKANSVAVNDDHVNNVLEITVQFNVSPYALRKGQFEDIWDDFNLEAGYAQFTKYSVNGTKKISLYNDSDLKSRFKVICQNDMTINGKYKYTKDYQDNPNFRLEPGINDLTVNGNGDIEFKWESEVML
1002115..1003875	PHAGE_Strept_5093_NC_012753: endolysin; PP_01024; phage(gi238801909)	1.71e-59	VSGGIDTGTLAISLENTLFNRILPYRWFIRIEDLQTNETIFRGRFIKVSKVYSTTHTQTLSFESELAYLHDSTQVYREIHNTSVNDFLQIIIDEHNRQVDDFKKITLGTINVTNSTDNVYRYLDETKDTLDNITDNLVNRLGGFLRIERNPNGQLILDYVNRLGTDTKQTIELGVNLKSFTRDLNVNNLITRLIPLGAEQAQKDDQRDSNKPIPKIDISSVNNGSRYLDDPKLIDKFGIIEKANVWDDVHDAGILKTKGEQYLKAQVSAEIAWSVDIVNLALIDKRFQSFAVGNSYRIIDKFMDIDETISVSEKDVDLVNPQTVTIKIGNQNKSLTSQQINQSRIINQLKNFSEYITSFNTQNNPPDSPDKPQPDKPHDQPSNPSSYYDGAIVDVSEFQ…
1003880..1004872	PHAGE_Staphy_Ipla5_NC_018281: virion associated hydrolase; PP_01025; phage(gi399528912)	2.64e-46	LNNQDKYYRDRSHITGKLDLEKLPKAIREKQYGIDVREAMAQTAEAIAGVQSTAKKFNQDTKNQVNQLDEKYTREIRAIVLGDTTSVAVPTIQEPNSEAGNPLPNLYETARGQVLYDFVKQSSLTKANKIGVIGDSVAATAGGFPDILAHQYNIYVENLSVGGAKMSDYDNNAIVNQASRLKQCDVVIIQGTDDDWVHDISLGYAGDTDIKTYLGGLQETIKRVKNNNPNAKLIVVNCTRQCVGINREYRTEKSKNALGLTLIDYMEAQKKYLNQQNVPYVDLMKPTSIFEPDNPAFKKTMMHDGLHPTPEAHQYIVQEIAKDYSYYYDD
1004887..1005501	PHAGE_Lactob_phig1e_NC_004305: minor capsid protein; PP_01026; phage(gi23455814)	4.41e-16	MANQELVYDITKQPNLQSTQQAIYARVGDGGLKAVTVQLNSNNSPYDLTGKNVNFEGVKADGTRIIDTSGGIVLDPQGGIFRYVFPPQTFTARGQFRQAFFKVMLGDKVDTTIDVAVDVSPNLVEFGINSESYLSEYEQLISELKDKQQTFLTDLGQKFDLSKTQLQNISDRLDNIKIQLATKDVVSKTEFNAKLNNAVFIKEV
1005507..1006244	PHAGE_Staphy_187_NC_007047: ORF006; PP_01027; phage(gi66395221)	2.49e-17	MSIKELQDATGTVIHPMTETNAIVDADKLVNTTSTQNNIAGIKNFVDGISIKGVPLSNINFGKINSVPNDNIYEINQSGLYYYYSKTTNRPLMDISYLNGYIVASFKDINNGILLFIGGLTTMEKFQGEWRKAETNTAMDLWSGGAKVGDTLKLAADVNNFDRLRFKLTTPLGNDYVERSTNKSTFWLTQVGLSGDGGAIRAAELTLDRMDDQKAMKLSKALINNGSSKADNLSDVVLTKIEGLK
1006698..1006826	PHAGE_Lactob_Lc_Nu_NC_007501: hypothetical protein; PP_01029; phage(gi77999997)	3.86e-05	MFEFIKYYFEIGLYTKDNLATFKSAAMITAAEYDQLVSTVAA
1006910..1008394	PHAGE_Lactob_Sha1_NC_019489: prophage Lp2 protein 53-like protein; PP_01030; phage(gi418489820)	8.48e-66	LAEKEEPKTEKTLSFTDTSPQTVKIGDTTTSFTLICSNENVATDLTNATSITVKLGNASGYLKSVQIDPTKLVEPWTGKITVNFSADLMNSLPAGRCAIEVWVVDSTGTSIYPSDGSTGFTIANNIQSTTGGTITTITFDDFVEAMNKAASTIAKGDPGEGLDIKGQVTSVSALPTTANEGDGYLVNEELYVYTIGAWKDCGTIQGPQGIQGKTGTGISSTTIQYQISNSATTSPTGTWSNSIVATTITNPYLWMKATLNYTDGTTKDFYLVSQKGDKGDKGDTPDLSNYVTVTDLNNGLSTKVTDNKNGEISVNGTSILPANEDVIGRIDGSYTDMNDIPMGWLYLNGWANVSSLANWGLPQGLYYVHCFKSNYGVHVNIQIAYGTHNNMYVRTMSNT…
1008408..1008767	PHAGE_Lactob_3_521_NC_048753: terminase small subunit; PP_01031; phage(gi100071)	1.51e-16	MFIYIKYDADGFITAYQNIEADGFTKVFILDSWITQFAQHSDKFRYDTDKKVILNPGNLPDLSLNELNTKYSDVLKTSQQAVQSATTLAQQQTVSETSINQLQKSITELALSQSAKGTA
1009029..1010234	PHAGE_Lactob_Sha1_NC_019489: endolysin; PP_01032; phage(gi418489821)	0	LNKRKLKALILTVGAIFMAFLMVNVTSQASTSRDQGVDWSKYNGNSGIFGYSTDKFVLSQAGGFYGGTNIPQTTYNSQVKSAQQAGKRVHTYLWDGVGGNMTNAKAMMAYYLPRVRTPKGSIVALDYEDGASNSVTANTNVIKAQFKLIKAYGYTPMLYGGKDYLNAHVNVSSIVRAYGSCLWLAEYPDYLIRTKPDYNWFPSMDGVAIFQFTSMYRITGYVNGVPQGLDGNVDLTGITKSGYTTASKKQAQTNVKKAQKAQAAKKATFKVVKYSQRGVFYPNRTLAVRYTDSDKVSQVATYYKGESVTYNAVIIEHDYVWARYTRSNGLYGFIKLGVTNGPAYGKRDTGQLVSHTYYTVKSGDSWWTIAQRNGLSMTTLASQNGKTIYTTIYPGQRLV…
1010267..1010497	PHAGE_Lactob_Sha1_NC_019489: phage-related holin; PP_01033; phage(gi418489822)	3.11e-42	MDIQKDVAATKTKVENIEEKLNQVDDIGDKADKALAKSIEVEHEIGRITQIQNWVIGVLVSGVLVTLVIYIAEKFL
1010508..1010894	PHAGE_Staphy_DW2_NC_024391: holin; PP_01034; phage(gi658608090)	2.88e-05	MIKKISFKNVDGSLNGKLIAGIISLLIVLVQQIFAMFGIKFTGDWTSIVAVVNTVLTILGMLGVITDVQTVTSPTVDSDEKSQVEATANKVADEAQTPTSTVAAVNSSASSNTETTSESASQSGEKVV
1011779..1012789	PHAGE_Strept_phiARI0131_1_NC_031901: hypothetical protein; PP_01036; phage(gi100005)	4.29e-40	MTYSTDKPFTSLDAQLKMLKNRGMKIDNTDYARQVLLNNNYYSVINGYKDPFLRKDGAGEALKPEMFIHKTTFSDVYTLYGFDRDLRNIVLNYLLIFESRLKSIISYEFAQKFPDPYSYLNIVNYSNDIGDLSNVLKNLKNLSLKLNRGRNERYGKPSIIHYVQQHTHVPLWVLVNTLTFGEIQYLYDSLDQNLKEKVARDFSEYYKLHWKSSEKIDTGELKSLIIVANLFRNVCAHDERFYNYSLRTKIPKSLFSKYYMNNPMFDDLEKPVDLFALISLLALVLTRKQFKAMTYSINSLIEKSNYKLKSIGIGKVLDLMGFPEIQWREKIQVKSD
complement(1013273..1014133)	PHAGE_Bacill_BCP8_2_NC_027355: putative polysaccharide deacetylase; PP_01037; phage(gi849252969)	2.76e-06	MGGFIMHMRGINFVLGLGVALGLLTGCQAASPATKQASSQSSKTSAKSVHSSAKHQARPYQHWHTVKDVHLPILMYHSISSGNQLRVPAKEFQTEMTYLKAHGYRTLTANEAVYALKHRRIPQKKIVWITLDDSYKDNMTAAWPILKQTHQHATINFITGFTYKKNHLTLADAKRMQASGNIDFQSHTVRHLDLNNLTYQVQLTELSSSKKWLDHNLQQNTQVICYPAGRANQQTIKADKQAGYQYALSTAPGIATSTQNPYNLTRQRVVPGMSLTAFQTLLTSNN
1014341..1014733	PHAGE_Staphy_StB20_like_NC_028821: hypothetical protein; PP_01038; phage(gi971746471)	3.06e-06	MNKKRAIWLAAIIMMISVGTLLIVPTMTKNQGSELAMAVDNLNPFVKVQTVYGRTNQAIGHSTGQMGEDIYTYRMLTSDAQGKQRWLTFTADHRLKQRHYLKIETKGQNVNSWEAVATNQVPQNIQEVLA
1014939..1016687	PHAGE_Bacill_SPbeta_NC_001884: ABC transporter; PP_01039; phage(gi9630145)	6.68e-18	MKGSVQMLKIAKGRISYSAVIGAVLFMIVQVIATLNLPSLTSNIVNNGVATGDISYIWKIGFEMIGFSLLSVVAAFGNVFLAARPSQQLGKNLRSDIYKKVINFSNDEFDKVETSSLITRTTNDVVQIQNVAMMALRMMIMAPIMLIGASFLAYTKSHELTWIFVVSIPVLLIFIGLIMAFAIPLFRAMQTKTDRINLVFREGLTGVRVIRAFRQDKFEQDRFEDANQDYTHNAIKVNTIVALAYPVMTLIMSGTNVAIVWFGGQLISSQTMQVGNMIAFMTYAMQVLMSFMMLAMVFAFIPRAAASASRIQEVLSIEPKITDPDKAATLPVTTEHSLEFDHVNYRYQSAEQLALADIDFKAHSGQTVAIIGGTGSGKTTLVNLIPRFYDIESGAVKLD…
1016807..1018576	PHAGE_Bacill_SPbeta_NC_001884: ABC transporter; PP_01040; phage(gi9630145)	6.25e-31	MRYMSDRWVGLAVVMIFAIASVIFQIRTPKILGKATTELYKGIMKGAAQQKAGISQSGYPINFEKIGQIIMIVLIMYLASALFNFIQQYIMTRISQRTVYKLRRSFKGKMQKVPISYYDTHSNGDIMSRAVNDMDNIANTLQQNLTQAVTSTVTFVGTLWMMLTISWKLTLIALVTIPLSVVVVGVIAPKSQKFFGTQQKSLGLLNNQVEENYAGHVVIKSFNKEQDAIDDFEIQNNNYYQSAWKAQFISGIIMPLMMFLNNIGYVFVAIIGGIDVANGNVSLGNIQAFLQYTQQFSQPISQMANLLNTIQSTVASAERVFEVLDEEEMKQTKSNLPAEPDSDNLISLQHVQFGYADNDLLMKDYNLDVKRGQQVAIVGPTGAGKTTIINLLERFYDIK…
Hit Against Bacterial Database and Genbank File
957825..957836	attL	0	TGGAAATGTTTG
960212..960319	hypothetical; PP_00968	0	MIATVILWVIKFMIVLFVGNVVAKLIKNPRRYFGM
960337..960348	attL	0	AGCATACAAAAA
963003..963422	hypothetical; PP_00971	0	MKVIYPSLVEQAFDIYVKQYGPVVSNRVNELKSCIYRALIKEGALDQNGEPTQKAKDKGLVGSFTPNEDGEYEPETVRDLKLMYPIYAQFSDDHFMKSSQGWLADAYVIRNVSSQVLNNPLSDEEQRKNAYKMLEQLDD
complement(964494..964712)	hypothetical; PP_00974	0	VHQVSALCQLCSALDQLVYHVGPRVDHVKLVLEKLLYQHLYHVDHVDHVNMNIYNYSSNDSKPAYQVSTLGS
971498..971803	hypothetical; PP_00981	0	MSSFIKKWLFEVTLNIILLIVPAYLIVFSIFQDGPIVLCLSTPVPVFGIKLLTFNFMVLSVLDFVHWPSDYHESKTIRKVIFVIHITIAVIALIISVRLMA
complement(971949..972089)	hypothetical; PP_00982	0	LGIRQIGKAADSESVIYWFEPSIPNIRYQLLSLVVKNTVITAFLLL
complement(972016..972088)	tRNA	0	TGGGTATTCGCCAAATTGGTAAGGCAGCGGACTCTGAATCCGTAATTTACTGGTTCGAGCCCAGTATACCCAA
complement(972410..972766)	hypothetical; PP_00983	0	MIAVVLVPQGITKSFVNFSSKNCYILATFFVFGRIVEEHIVFEWFSSVKQKHQNAFISAFWCFVVSLYLSTYHPHGDRTRNSALRGRRLNQFDQRAQIHLLSYRMISGLSNIIKIFAT
972479..972551	tRNA	0	TGCCCGCTGGTCAAATTGGTTAAGACGTCGCCCTCTCAAGGCGGAGTTACGGGTTCGATCCCCGTGCGGGTGA
complement(974246..974316)	tRNA	0	GCGAGTGTAGTTTAGTGGTAAAACGACAGCCTTCCAAGCTGTAGTCGCGGGTCCGATTCCCGTCACTCGCT
complement(974374..974550)	hypothetical; PP_00985	0	MDKDMSKYELIDNITNDLTSFIDLYAVVYLTKDSYSRKECGRIIQGMEKDMVDRLKQK
complement(974708..974793)	tRNA	0	GCGAGCGTAGTTCAACGGTAGAACGGTGCTCCTTTGAATTGCTGACTAGATACTAACAGATGTAGGTTCGACTCCTGCCGCTCGCA
complement(974823..975521)	hypothetical; PP_00986	0	MFLLSLIALAYFSIRGGIHHFTKTGVNRPYKKYTLISVGLTILFLALTVWAAPSGTARSSASQSDTASSSKAKKSSAKDASKRKASISKANSIKEKESSESALSSSKKESESIAASKSESKEDSESIASSESESSKKQSEAESSSIAKASSESLVASSSSAKKASETSKTDNASYTQNGGWTTAASGMVFVSDSNKYYTSVKNPGNYQYMTQSAADNSGAKPAPRGNQYARP
complement(975641..975724)	tRNA	0	GCGAGTGTAGTTCAATGGTAGAACGGTTCCTTTAATTCAAGCATAACCTACTTTCCGATGCAGGTTCGATTCCTGCCACTCGCA
977732..977833	hypothetical; PP_00991	0	MFEALSDKALDAEFRAVTAEYNEQASQLMSVSY
977845..978150	hypothetical; PP_00992	0	MSDTILIRHEAPKGFQFISEEEYERFQAWKQAQRGIRTWKLKDLAKYKYGTKSTERASRYLTKHRHDLDIEQGGFIDYVNTHNGWQIPAAEMMDYLLDHPD
978831..978968	hypothetical; PP_00994	0	MKTMKFTFRIGNVLYKQITIEELNNVFGTFKEVERIGSTQSIAKA
979101..979214	hypothetical; PP_00995	0	MNGYDSWLVDQEEAAEGWRDDEPTEEELIESGVIAGY
983672..983683	attR	0	AGCATACAAAAA
984431..984503	tRNA	0	GTGGCCTTAGCTCAGTTGGTAGAGCGCCTGACTGTTAATCAGGTTGTCGCTGGTTCGAGTCCAGCAGGCTACG
984572..984643	tRNA	0	GCAGATATGATCTAATTGGCAAGATGGCGGTCTCCAAAACCGTCTATGTTGGTTCAAATCCAGCTATCTGTG
complement(984692..985237)	hypothetical; PP_01003	0	MPEGAKAPFQYLYTIPQRACSCMQSGGQFNCASYVGAVQFSALNSKQVSIDLLLIQIFTHYHCVPTCLMCLVGICTLHSNTIPCCLLKHLPYSATSTANVNKTMGVHVMKLIPNTTPALFSSLVTCLGQYDWCGPSRELISDSQLSPLIISPVGLEPTSHCGLPISPQRYSHSTADVKYED
988005..988121	hypothetical; PP_01009	0	MANSMTNATINHQAMYIKPMTAAIKMKSTNQFKPRHAI
994307..994630	hypothetical; PP_01016	0	MRYQDKVYLLTKLIDEDPDSLNHQVSYRSQVVPANVQQINLTFAPNGTVYNATVIRVYGRYQADAIGFDGEYVEGDNDTVHEIQKVSQHDKQTAFYIIHNEVILHGE
994722..995174	hypothetical; PP_01017	0	MPEAMEEANKEYQRAVALSKAFIKNAGAREQEAAQGLERTQVGHGKSGYVPTGTLQGSLEIKISDDGKSVSVKPMATVADQKRALAAIAGSGSKKPITSQDGVDYYGVYVEYGTYRMAAEPFMKPTGEKIAMRLDNEFERIMRLAVLGSD
995176..995562	hypothetical; PP_01018	0	MSPEEDLLLSVKQCLRALNVPVYDFGQQRPTKFPQVVVSLQNEQEQTDIKVLDYFLGTVAVDVYTDLANVGQAYALGRKVANAMQRLKLAEWPSKYDSSSMRKLSDNSLEGRPLTRLAYLFDIFVYGK
995574..996134	hypothetical; PP_01019	0	MAGLKLQTKSADKILYGIKFPWDDKATLIQMLGLQAASSTTNTRASSAVNLKQGVLHTSGSRSETFVVDSYWTIGDKIHDGIKKAVQQDVAIGIWRMDFNEATLDTGGKVKSVPAEFGMAKPNGLPETEAVNNLLHANITYNIDGNTQDGVLDVAELDPQLLADGLKMFDFAHNTDIGGTTSSLGH
996733..996969	hypothetical; PP_01021	0	MLNQQREQMHARLMPQATYGVELSQPLNEVVERSDEQITNEISKLTDYRTTEERQPDTPQMAMYRKLMEAKADREEAD
1006271..1006606	hypothetical; PP_01028	0	MLDATGHVTSYATVGGLTGATTYEGEIPDEFLTSTQPQAFKLIDNVLTKDPNYVAPVTDAVKHQPSDEQRFQAQLALQMATMQKKQAEFNAQVLLQLADTKKAPATQATPV
complement(1011480..1011629)	hypothetical; PP_01035	0	MIKWFAKSPYVVFIFLCIKVARFLMYSYDNTEPSNNLVSSFAEILSLMY
1020165..1020176	attR	0	TGGAAATGTTTG

## Sheet: Table S3
Table S3: Predicted Transporter Proteins and interpretation of their signal peptide.
TCDB		SignalPeptide 5.0
TCDB ID	Protein Name	aa	SP	TAT	LIPO	CS	OTHER
Q13U92	Putative membrane-anchored cell sub-family protein	M	S	0.454279	0.089933	0.012807	1.9e-05
		N	S	0.454302	0.089901	0.012719	4.7e-05
		K	S	0.454319	0.089877	0.012643	3.2e-05
		T	S	0.454333	0.089863	0.012582	1.4e-05
		Y	S	0.454343	0.089852	0.012527	7e-06
		R	S	0.454345	0.089841	0.012468	1.8e-05
		S	S	0.454336	0.089833	0.012409	3.3e-05
		V	S	0.454332	0.089835	0.012362	2.1e-05
		W	S	0.454323	0.089836	0.012316	2.5e-05
		N	S	0.45431	0.089839	0.012273	3.2e-05
		E	S	0.454289	0.089845	0.012231	4.3e-05
		S	S	0.454256	0.089853	0.012185	6.1e-05
		T	S	0.454106	0.089862	0.01213	0.000187
		G	S	0.453646	0.089865	0.012009	0.000568
		T	S	0.453281	0.089879	0.011908	0.000457
		W	S	0.453001	0.089895	0.011811	0.000366
		V	S	0.452218	0.089906	0.011591	0.000996
		A	S	0.45067	0.089878	0.011278	0.001897
		A	S	0.447405	0.089759	0.010516	0.004149
		S	S	0.445526	0.089662	0.010224	0.002308
		E	S	0.444581	0.089636	0.010071	0.001167
		H	S	0.443737	0.089622	0.009902	0.001064
		A	S	0.441639	0.089438	0.009385	0.002834
		S	S	0.440112	0.089339	0.009151	0.001904
		A	S	0.43113	0.088352	0.008342	0.010809
		R	S	0.429161	0.088323	0.008106	0.002322
		G	S	0.425973	0.088006	0.007617	0.004045
		K	S	0.424111	0.087906	0.007326	0.00233
		K	S	0.422996	0.087864	0.007091	0.001458
		S	S	0.421364	0.087656	0.006786	0.002208
		S	S	0.419593	0.087489	0.006483	0.002313
		A	S	0.41393	0.08677	0.005834	0.007101
		K	S	0.412164	0.086618	0.005527	0.002336
		T	S	0.410282	0.086361	0.0053	0.002454
		S	S	0.408888	0.086191	0.005082	0.001892
		S	S	0.407448	0.086002	0.004812	0.002011
		T	S	0.406157	0.085836	0.004577	0.001812
		K	S	0.404764	0.085712	0.00436	0.001862
		A	S	0.402108	0.085311	0.004008	0.003538
		V	S	0.401269	0.085299	0.00387	0.001152
		V	S	0.400265	0.085188	0.003744	0.00139
		G	S	0.398606	0.085049	0.003552	0.002161
		A	S	0.395566	0.084692	0.00328	0.003841
		L	S	0.394969	0.084662	0.003174	0.000928
		G	S	0.39333	0.084433	0.003008	0.002209
		L	S	0.392766	0.084514	0.002902	0.000778
		A	S	0.390539	0.084362	0.002665	0.002772
		A	S	0.389013	0.08432	0.002099	0.002292
		G	S	0.386935	0.084201	0.001747	0.002696
		L	S	0.386055	0.084236	0.001674	0.001066
		Y	S	0.385461	0.084326	0.001634	0.00068
		G	S	0.371393	0.083748	0.000945	0.015453
		A	S	0.366369	0.083304	0.000424	0.006092
		D	S	0.36476	0.083326	0.000392	0.001684
		A	C	0.148075	0.04505	0.000203	0.255499
		F	X	0.144321	0.04486	0.000199	0.004138
		A	X	0.01952	0.003341	8.5e-05	0.166987
		L	X	0.015509	0.002559	7.5e-05	0.004833
		G	X	0.009295	0.001167	6.4e-05	0.007637
		G	X	0.006982	0.000823	5.9e-05	0.002664
		G	X	0.005542	0.000624	5.8e-05	0.001644
		L	X	0.004475	0.000503	5.8e-05	0.001196
		T	X	0.003614	0.000413	5.9e-05	0.000959
		L	X	0.002852	0.000288	5.6e-05	0.000909
		C	X	0.002376	0.000219	5.6e-05	0.00056
		P	X	0.002114	0.000207	5.8e-05	0.000287
		T	X	0.001832	0.00019	5.8e-05	0.00032
		T	X	0.001665	0.000175	5.8e-05	0.000206
		E	X	0.001435	0.000157	5.9e-05	0.000289
		G	X	0.001267	0.000156	6.3e-05	0.000209
WP_060331514.1	autotransporter-associated beta structure protein	M	S	0.651775	0.183951	0.020811	2.3e-05
		G	S	0.651773	0.18394	0.020718	0.000107
		A	S	0.651787	0.183945	0.020638	8.6e-05
		G	S	0.651778	0.18395	0.02056	9.4e-05
		G	S	0.651729	0.183952	0.020478	0.000142
		S	S	0.651693	0.183966	0.020396	0.00013
		L	S	0.651651	0.183986	0.020324	0.000115
		A	S	0.651357	0.183994	0.020214	0.000403
		A	S	0.650988	0.184009	0.019889	0.0007
		T	S	0.650561	0.184021	0.019693	0.000631
		G	S	0.648616	0.183966	0.018534	0.003165
		A	S	0.646311	0.18385	0.017641	0.003347
		V	S	0.645174	0.183814	0.017293	0.001577
		N	S	0.643639	0.183788	0.016784	0.002103
		L	S	0.64071	0.183732	0.01616	0.003633
		A	S	0.634945	0.183593	0.014762	0.007325
		N	S	0.63121	0.18359	0.013953	0.004591
		A	S	0.60292	0.18232	0.01197	0.031535
		G	S	0.596052	0.182208	0.009481	0.009564
		A	S	0.57097	0.181101	0.00825	0.02745
		T	S	0.56621	0.180895	0.007996	0.005285
		L	S	0.562869	0.180687	0.007859	0.003726
		D	S	0.561067	0.180625	0.007737	0.002031
		L	S	0.55813	0.180497	0.007579	0.003259
		S	S	0.551296	0.180284	0.007222	0.007417
		A	S	0.515228	0.178467	0.005935	0.039158
		A	S	0.48785	0.175177	0.005084	0.03151
		T	S	0.48058	0.174506	0.00485	0.008167
		S	S	0.459631	0.172311	0.004357	0.023599
		A	S	0.423901	0.165461	0.003407	0.043503
		Q	S	0.409299	0.164458	0.003204	0.015857
		A	C	0.250207	0.114026	0.002536	0.210208
		I	X	0.24142	0.112512	0.002473	0.010513
		G	X	0.214543	0.106016	0.002145	0.033711
		A	X	0.191636	0.097391	0.001797	0.031932
		L	X	0.176495	0.094792	0.001672	0.017903
		A	X	0.102344	0.065046	0.00126	0.104358
		G	X	0.089138	0.058325	0.000839	0.020468
		S	X	0.070075	0.049407	0.000633	0.028203
		A	X	0.050481	0.038107	0.000397	0.031171
		G	X	0.039782	0.031095	0.000195	0.017933
		T	X	0.033257	0.025993	0.000147	0.011659
		S	X	0.028358	0.023088	0.000117	0.007827
		V	X	0.02555	0.020872	0.000109	0.005021
		N	X	0.022851	0.019137	0.000102	0.004437
		L	X	0.019481	0.016255	8.9e-05	0.006275
		G	X	0.017056	0.01471	8.1e-05	0.003989
		G	X	0.015411	0.013	7.3e-05	0.00338
		N	X	0.014347	0.012149	7.2e-05	0.001936
		S	X	0.012841	0.011114	6.7e-05	0.002575
		L	X	0.011916	0.010237	6.6e-05	0.001831
		T	X	0.010443	0.008956	6e-05	0.002797
		L	X	0.009233	0.007863	5.6e-05	0.00234
		N	X	0.008207	0.006952	5.3e-05	0.001972
		G	X	0.00704	0.00572	4.5e-05	0.002447
		T	X	0.006325	0.005167	4.3e-05	0.001304
		T	X	0.005872	0.004823	4.6e-05	0.000831
		N	X	0.005085	0.004027	4.6e-05	0.001641
		A	X	0.004032	0.003142	3.7e-05	0.002039
		T	X	0.003525	0.002785	3.8e-05	0.000905
		Y	X	0.002958	0.002406	3.9e-05	0.000997
		A	X	0.002132	0.001619	2.6e-05	0.001706
		G	X	0.001729	0.001384	2.4e-05	0.000669
		S	X	0.001371	0.00112	2.2e-05	0.000649
		I	X	0.001184	0.001002	2.3e-05	0.000325
		G	X	0.00101	0.000877	2.4e-05	0.000321
		G	X	0.000826	0.00067	2.3e-05	0.000424
		A	X	0.000645	0.000428	2.3e-05	0.000459
		G	X	0.000573	0.000315	2.5e-05	0.000218
		G	X	0.000534	0.000304	3.3e-05	7.7e-05
CAH35630.1	putative outer membrane protein	M	X	0.096385	0.042826	0.016857	2.5e-05
		N	X	0.096341	0.042777	0.016717	6e-05
		R	X	0.096299	0.042736	0.016595	4.3e-05
		I	X	0.096261	0.042709	0.016498	1.4e-05
		F	X	0.096223	0.042685	0.016407	7e-06
		K	X	0.096185	0.042664	0.016319	1e-05
		S	X	0.096147	0.042644	0.016233	1.2e-05
		I	X	0.096112	0.042629	0.016156	6e-06
		W	X	0.096066	0.042615	0.016076	2.4e-05
		C	X	0.096003	0.042603	0.015999	4.5e-05
		E	X	0.095952	0.042594	0.015935	3.1e-05
		Q	X	0.095916	0.042588	0.015871	2.1e-05
		T	X	0.095865	0.042584	0.015799	4.6e-05
		R	X	0.095741	0.04258	0.015657	0.000189
		T	X	0.095585	0.042577	0.015501	0.000237
		W	X	0.095463	0.042578	0.015401	0.00015
		V	X	0.095106	0.042576	0.015184	0.000507
		A	X	0.094259	0.042569	0.014823	0.001146
		A	X	0.092434	0.042502	0.013551	0.003091
		S	X	0.091298	0.042471	0.012911	0.001761
		E	X	0.090782	0.04247	0.012666	0.000723
		H	X	0.09007	0.042468	0.0124	0.000943
		A	X	0.089147	0.042427	0.011708	0.001624
		V	X	0.088347	0.042408	0.011454	0.001047
		A	X	0.086083	0.042005	0.010076	0.004009
		R	X	0.085085	0.041919	0.009765	0.001398
		G	X	0.083858	0.041718	0.009375	0.001796
		G	X	0.082486	0.041643	0.008588	0.002227
		R	X	0.081108	0.041589	0.008158	0.00185
		A	X	0.078614	0.041215	0.007318	0.003689
		S	X	0.076832	0.04108	0.006701	0.002539
		S	X	0.074815	0.040756	0.005636	0.003401
		V	X	0.073938	0.040682	0.005499	0.001099
		V	X	0.072725	0.040619	0.005318	0.001462
		A	X	0.070615	0.040349	0.004414	0.00329
		S	X	0.068754	0.040201	0.00381	0.002638
		A	X	0.066577	0.039684	0.003156	0.00337
		G	X	0.065303	0.039564	0.002707	0.001876
		G	X	0.063966	0.039334	0.002307	0.001995
		L	X	0.063192	0.039277	0.002219	0.000952
		E	X	0.062793	0.039227	0.002146	0.000551
		K	X	0.06238	0.039146	0.002037	0.000636
		V	X	0.062036	0.039061	0.001962	0.00054
		L	X	0.061583	0.038981	0.001884	0.000648
		K	X	0.061065	0.038784	0.001768	0.000871
		L	X	0.060762	0.038627	0.001703	0.000569
		S	X	0.060468	0.03856	0.001665	0.000443
		I	X	0.060202	0.038504	0.001637	0.000397
		L	X	0.059895	0.038475	0.001606	0.000413
		G	X	0.059117	0.038387	0.00152	0.000999
		A	X	0.058327	0.038252	0.001354	0.001139
		A	X	0.057726	0.0381	0.001197	0.000954
		S	X	0.057284	0.038003	0.001081	0.000695
		L	X	0.056843	0.037937	0.001024	0.000599
		I	X	0.05655	0.037925	0.000991	0.000372
		A	X	0.055365	0.037676	0.000733	0.001732
		M	X	0.054787	0.037593	0.000648	0.000774
		G	X	0.052064	0.036614	0.000434	0.003962
		V	X	0.051473	0.036471	0.000387	0.000811
		V	X	0.050797	0.036397	0.000346	0.000813
		G	X	0.050006	0.036293	0.000298	0.000964
		P	X	0.048836	0.036045	0.000234	0.001507
		F	X	0.047786	0.035984	0.000209	0.001154
		A	X	0.031048	0.029313	0.000144	0.023545
		E	X	0.029829	0.02905	0.000139	0.001502
		E	X	0.027157	0.027366	0.000121	0.004403
		A	X	0.023875	0.021346	9.9e-05	0.009388
		M	X	0.021756	0.019752	8.1e-05	0.003789
		A	X	0.0073	0.004073	6.4e-05	0.030413
		A	X	0.006761	0.003831	7.1e-05	0.000809
Q79FV6	PE-PGRS FAMILY PROTEIN	M	X	0.208615	0.206616	0.011028	3.3e-05
		S	X	0.20856	0.206618	0.01091	8.8e-05
		F	X	0.208518	0.206649	0.010817	6.2e-05
		V	X	0.208464	0.20667	0.010732	6.5e-05
		I	X	0.208417	0.206693	0.01065	4.9e-05
		A	X	0.208163	0.206699	0.010558	0.00028
		A	X	0.207885	0.20672	0.010459	0.000316
		P	X	0.207548	0.206749	0.010368	0.000372
		D	X	0.207402	0.206781	0.010293	0.000164
		L	X	0.207131	0.206812	0.010204	0.000302
		V	X	0.206583	0.206845	0.010096	0.0006
		A	X	0.203562	0.206859	0.009643	0.003435
		M	X	0.196172	0.206879	0.009133	0.007859
		A	X	0.169371	0.206538	0.007695	0.028551
		T	X	0.165017	0.206561	0.007227	0.004849
		E	X	0.162335	0.206594	0.006973	0.002939
		D	X	0.159762	0.206634	0.006718	0.002833
		L	X	0.156413	0.206657	0.006337	0.00376
		A	X	0.151454	0.206587	0.005862	0.005556
		G	X	0.147864	0.206537	0.00554	0.004023
		I	X	0.145179	0.206478	0.005376	0.002962
		G	X	0.142011	0.206382	0.005079	0.003613
		A	X	0.138203	0.206191	0.004757	0.004372
		S	X	0.135827	0.206096	0.004545	0.002736
		L	X	0.134014	0.205982	0.004373	0.002141
		T	X	0.131693	0.205893	0.004236	0.002581
		A	X	0.128054	0.205553	0.003605	0.004633
		A	X	0.12492	0.20493	0.003182	0.004203
		N	X	0.123457	0.204825	0.003103	0.001655
		A	X	0.102889	0.195779	0.002731	0.029962
		A	X	0.09915	0.194976	0.002504	0.005073
		A	X	0.073313	0.184973	0.002088	0.0363
		A	X	0.056118	0.166143	0.001628	0.03664
		V	X	0.054839	0.16511	0.001611	0.002435
		P	X	0.052775	0.163394	0.001534	0.003877
		T	X	0.050947	0.161598	0.001436	0.003754
		S	X	0.050178	0.161066	0.001403	0.001365
		G	X	0.048294	0.158409	0.001293	0.004688
		L	X	0.047162	0.157087	0.001248	0.002532
		L	X	0.045693	0.155684	0.001198	0.002949
		A	X	0.035175	0.137277	0.00098	0.02918
		A	X	0.029991	0.124378	0.000656	0.01846
		A	X	0.020909	0.089347	0.000446	0.044377
		G	X	0.016454	0.07278	0.000293	0.021264
		D	X	0.015614	0.070668	0.000285	0.002986
		E	X	0.015087	0.069603	0.000293	0.001603
		V	X	0.01432	0.066664	0.000291	0.003743
		S	X	0.013145	0.063437	0.000274	0.004484
		A	X	0.009771	0.040991	0.000184	0.026046
		A	X	0.008031	0.029953	0.000143	0.012961
		I	X	0.007287	0.027555	0.000144	0.0032
		A	X	0.004792	0.01586	7.1e-05	0.014389
		A	X	0.003943	0.012857	5.1e-05	0.003928
		L	X	0.003515	0.011656	4.8e-05	0.001657
		F	X	0.00312	0.010468	4.6e-05	0.001618
		S	X	0.002747	0.009317	4.2e-05	0.00157
		S	X	0.002475	0.00839	4.1e-05	0.001242
		H	X	0.002276	0.007859	4.5e-05	0.000775
		G	X	0.001802	0.005994	3.2e-05	0.002455
		Q	X	0.001634	0.005451	3.1e-05	0.000759
		Q	X	0.001508	0.005046	3.4e-05	0.000571
		Y	X	0.001397	0.004667	3.8e-05	0.000533
		Q	X	0.001259	0.004211	4.1e-05	0.000653
		A	X	0.001104	0.00359	4.3e-05	0.000846
		M	X	0.001025	0.003338	5.1e-05	0.000386
		S	X	0.000857	0.00272	5.1e-05	0.000886
		A	X	0.000734	0.002047	5.1e-05	0.000894
		Q	X	0.000635	0.001511	5.6e-05	0.000729
		A	X	0.000475	0.000705	4.1e-05	0.001142
		A	X	0.000445	0.00065	4.7e-05	0.000124
Q86IX4	Nsp1_C domain-containing protein	M	S	0.369357	0.213654	0.043016	0.000193
		S	S	0.369029	0.213628	0.042932	0.000417
		N	S	0.368735	0.213615	0.042863	0.000361
		N	S	0.36856	0.213603	0.042807	0.000224
		L	S	0.368413	0.213593	0.042755	0.000185
		F	S	0.368286	0.213585	0.042703	0.000163
		G	S	0.36787	0.213579	0.042634	0.000467
		T	S	0.36721	0.213574	0.042488	0.000794
		G	S	0.366185	0.213568	0.042302	0.001204
		S	S	0.365334	0.213552	0.042048	0.001116
		S	S	0.364557	0.213543	0.041744	0.001086
		T	S	0.36363	0.213525	0.041387	0.001295
		S	S	0.36214	0.213367	0.040462	0.002557
		S	S	0.359679	0.212979	0.03927	0.004021
		S	S	0.355233	0.212343	0.037754	0.006571
		L	S	0.349586	0.211698	0.036397	0.007614
		F	S	0.339448	0.210992	0.03535	0.011824
		G	S	0.306907	0.209078	0.030014	0.039685
		S	S	0.288499	0.207932	0.027743	0.021742
		T	S	0.283749	0.207682	0.027339	0.005321
		P	S	0.27456	0.207393	0.026541	0.010197
		S	S	0.258311	0.206276	0.024413	0.019396
		A	S	0.236663	0.204183	0.021377	0.026652
		G	S	0.204341	0.200325	0.018828	0.038577
		G	C	0.17761	0.194666	0.015894	0.035193
		L	X	0.165698	0.191491	0.014927	0.015946
		F	X	0.151858	0.18915	0.014356	0.016639
		G	X	0.134636	0.185261	0.012003	0.023357
		G	X	0.126621	0.181933	0.006517	0.016742
		G	X	0.119684	0.178622	0.003805	0.012861
		S	X	0.113366	0.175452	0.003191	0.00999
		S	X	0.107232	0.17192	0.002703	0.010028
		T	X	0.102066	0.168345	0.002423	0.00889
		T	X	0.099416	0.166918	0.00233	0.004038
		P	X	0.091257	0.162181	0.001979	0.013126
		A	X	0.074402	0.140076	0.001214	0.039622
		T	X	0.068474	0.135313	0.000972	0.010812
		G	X	0.054463	0.112395	0.000625	0.037164
		G	X	0.048755	0.103735	0.000468	0.014438
		G	X	0.045669	0.100591	0.000432	0.006184
		G	X	0.043027	0.097886	0.000415	0.005303
		L	X	0.040399	0.094902	0.000387	0.0056
		F	X	0.038165	0.091724	0.000374	0.005401
		G	X	0.034816	0.08552	0.000335	0.00958
		G	X	0.03133	0.077604	0.000266	0.011481
		A	X	0.026973	0.063949	0.000197	0.018107
		S	X	0.024567	0.058968	0.00018	0.007425
		T	X	0.022151	0.052409	0.000166	0.008995
		T	X	0.020891	0.049622	0.000164	0.004049
		P	X	0.018014	0.045233	0.000149	0.007299
		A	X	0.013816	0.027768	0.000106	0.021766
		T	X	0.012268	0.025158	0.000104	0.004165
		G	X	0.009831	0.018313	9.7e-05	0.009307
		G	X	0.008458	0.01526	9.4e-05	0.004444
		G	X	0.007547	0.013902	9.5e-05	0.002285
		L	X	0.006803	0.012854	9.6e-05	0.001818
		F	X	0.006189	0.011818	9.9e-05	0.00168
		G	X	0.00542	0.010292	9.9e-05	0.00234
		G	X	0.004656	0.008221	8.9e-05	0.002903
		A	X	0.0037	0.00578	7.3e-05	0.003489
		S	X	0.003172	0.004706	6.9e-05	0.001654
		T	X	0.002735	0.004062	6.3e-05	0.001128
		T	X	0.002579	0.003871	6.3e-05	0.000376
		P	X	0.002157	0.003391	6e-05	0.00095
		A	X	0.001628	0.002381	4.5e-05	0.001619
		T	X	0.001351	0.001958	4.5e-05	0.000729
		G	X	0.001057	0.001489	4.4e-05	0.000805
		G	X	0.000844	0.0011	4.6e-05	0.000634
		G	X	0.000696	0.000863	5e-05	0.000419
		L	X	0.00065	0.000802	5.6e-05	0.000145
WP_010035418.1	FG-GAP repeat protein	M	X	0.011778	0.002462	0.001293	1.9e-05
		P	X	0.011745	0.002397	0.001213	4.2e-05
		N	X	0.011718	0.00235	0.001156	1.3e-05
		W	X	0.011692	0.00231	0.001107	6e-06
		S	X	0.011667	0.002273	0.001059	7e-06
		K	X	0.011643	0.002238	0.001015	6e-06
		Q	X	0.011618	0.002206	0.000972	8e-06
		M	X	0.011594	0.002177	0.000933	6e-06
		F	X	0.011571	0.002149	0.000897	5e-06
		K	X	0.011546	0.002123	0.000862	9e-06
		S	X	0.011519	0.002099	0.000828	1.5e-05
		Q	X	0.011494	0.002077	0.000798	1.2e-05
		Q	X	0.011471	0.002056	0.000774	8e-06
		P	X	0.011443	0.002037	0.00075	1.6e-05
		T	X	0.011414	0.002017	0.000727	1.6e-05
		R	X	0.011377	0.002	0.000705	2.6e-05
		P	X	0.011285	0.001981	0.000672	9.4e-05
		V	X	0.011221	0.001964	0.000647	6.2e-05
		H	X	0.01115	0.001949	0.000625	6.5e-05
		L	X	0.010968	0.001934	0.000592	0.000189
		A	X	0.010844	0.00192	0.000568	0.000125
		P	X	0.010716	0.001907	0.000546	0.000128
		R	X	0.010504	0.001893	0.000513	0.000227
		L	X	0.010364	0.001878	0.000493	0.000146
		G	X	0.010033	0.001849	0.000449	0.000378
		V	X	0.009827	0.001826	0.000423	0.000228
		E	X	0.009424	0.001814	0.000392	0.000421
		A	X	0.005208	0.001532	0.000322	0.004547
		L	X	0.005006	0.00152	0.000302	0.000217
		E	X	0.004772	0.001436	0.000273	0.000334
		D	X	0.00462	0.001374	0.00025	0.000226
		R	X	0.004323	0.00134	0.000213	0.00036
		S	X	0.004018	0.001292	0.000182	0.000376
		V	X	0.003907	0.001264	0.00017	0.000144
		P	X	0.003478	0.00121	0.000138	0.000508
		A	X	0.002764	0.000868	9.1e-05	0.001098
		T	X	0.002614	0.000829	8.7e-05	0.000187
		V	X	0.002501	0.000771	8.5e-05	0.000169
		I	X	0.002419	0.000764	8.5e-05	8.8e-05
		T	X	0.002262	0.000748	8.2e-05	0.000175
		I	X	0.002155	0.000729	7.7e-05	0.000131
		Q	X	0.002035	0.000714	7.3e-05	0.000141
		E	X	0.001913	0.000706	6.9e-05	0.000135
		A	X	0.001675	0.000618	5.5e-05	0.000342
		A	X	0.001526	0.000596	4.6e-05	0.000181
		G	X	0.001154	0.000433	3.1e-05	0.000553
		S	X	0.000956	0.000361	2.3e-05	0.000281
		L	X	0.000903	0.000345	2.2e-05	7.1e-05
		D	X	0.000873	0.000338	2.2e-05	3.8e-05
		G	X	0.000815	0.000328	2.1e-05	7e-05
		F	X	0.000794	0.000322	2.2e-05	3.1e-05
		L	X	0.000759	0.000304	2.2e-05	5.7e-05
		S	X	0.000692	0.000276	1.9e-05	0.000104
		A	X	0.000531	0.000206	1.2e-05	0.000247
		T	X	0.000488	0.00018	1.1e-05	7.3e-05
		D	X	0.000468	0.000173	1.2e-05	3e-05
		G	X	0.000434	0.000163	1.1e-05	5e-05
		T	X	0.000422	0.000158	1.2e-05	2e-05
		I	X	0.000412	0.000157	1.3e-05	1.6e-05
		A	X	0.000346	0.000135	1e-05	0.000103
		L	X	0.000326	0.000131	1e-05	3.1e-05
		N	X	0.000308	0.000127	1e-05	2.9e-05
		D	X	0.000302	0.000126	1.1e-05	1.2e-05
		L	X	0.000293	0.000125	1.2e-05	1.9e-05
		A	X	0.000276	0.000121	1.2e-05	3.4e-05
		G	X	0.000252	0.000116	1.2e-05	4.1e-05
		Q	X	0.00022	0.00011	1.2e-05	5.4e-05
		A	X	0.000179	9.5e-05	1.2e-05	7.7e-05
		G	X	0.000162	9.2e-05	1.3e-05	3.6e-05
		T	X	0.000152	9.5e-05	1.6e-05	2.2e-05
WP_015293093.1	PE family protein	M	X	0.221734	0.262451	0.024218	3.7e-05
		S	X	0.221699	0.262468	0.024125	7.5e-05
		F	X	0.221663	0.262511	0.024049	7.2e-05
		L	X	0.221626	0.262542	0.023979	6.6e-05
		L	X	0.221588	0.262571	0.023911	6.5e-05
		V	X	0.221554	0.26261	0.023853	5.1e-05
		E	X	0.221512	0.262647	0.023792	6.2e-05
		P	X	0.221455	0.262684	0.023727	8.9e-05
		D	X	0.221408	0.262729	0.023659	7.9e-05
		L	X	0.221347	0.262772	0.023593	9.1e-05
		V	X	0.221256	0.262816	0.023499	0.000148
		T	X	0.220767	0.26284	0.023122	0.000848
		A	X	0.216617	0.262332	0.021218	0.006552
		A	X	0.212114	0.262052	0.019307	0.006722
		A	X	0.20667	0.261152	0.016419	0.009245
		A	X	0.202838	0.260514	0.014245	0.006677
		N	X	0.201506	0.260422	0.013654	0.002117
		L	X	0.199423	0.260114	0.01259	0.003499
		A	X	0.197363	0.259784	0.011396	0.003641
		G	X	0.196119	0.259677	0.010392	0.002419
		I	X	0.195445	0.259593	0.010161	0.001038
		R	X	0.194614	0.259527	0.009828	0.001272
		S	X	0.192751	0.259197	0.009282	0.002765
		A	X	0.190495	0.2584	0.008611	0.003747
		L	X	0.189133	0.257893	0.008332	0.002169
		S	X	0.184284	0.255245	0.007759	0.008082
		E	X	0.182926	0.255021	0.007499	0.001876
		A	X	0.174065	0.248343	0.006707	0.016328
		A	X	0.171292	0.247232	0.00619	0.004478
		A	X	0.147779	0.229799	0.005249	0.041886
		A	X	0.117593	0.201389	0.004324	0.059685
		A	X	0.104002	0.174595	0.003532	0.041397
		S	X	0.100307	0.168882	0.003215	0.0099
		T	X	0.098529	0.166451	0.00315	0.004357
		P	X	0.09675	0.165078	0.003055	0.003328
		T	X	0.09532	0.163782	0.002933	0.002939
		T	X	0.094109	0.163195	0.002889	0.001936
		A	X	0.090323	0.157581	0.002537	0.009855
		L	X	0.088002	0.156335	0.002392	0.003836
		A	X	0.069568	0.114978	0.001836	0.060496
		S	X	0.065505	0.111583	0.0015	0.007964
		A	X	0.051434	0.086999	0.001069	0.039205
		G	X	0.046334	0.082173	0.000817	0.010309
		A	X	0.02448	0.042102	0.000451	0.062484
		D	X	0.02323	0.040966	0.000442	0.002449
		E	X	0.02185	0.038835	0.000439	0.003557
		V	X	0.020396	0.036288	0.000422	0.00407
		S	X	0.018291	0.033355	0.000354	0.005183
		A	X	0.013581	0.022581	0.000188	0.015813
		A	X	0.011197	0.017844	0.000122	0.007297
		V	X	0.010036	0.016436	0.000117	0.002619
		S	X	0.008724	0.014872	0.000108	0.002935
		R	X	0.00738	0.01299	9.1e-05	0.003297
		L	X	0.006494	0.011385	8.4e-05	0.002551
		F	X	0.005696	0.01007	7.4e-05	0.002176
		G	X	0.004906	0.008403	5.9e-05	0.002541
		A	X	0.004322	0.007391	5.1e-05	0.001658
		Y	X	0.003999	0.006962	5.3e-05	0.000793
		G	X	0.003412	0.005719	4.1e-05	0.001924
		Q	X	0.003158	0.005454	4.2e-05	0.000563
		Q	X	0.002958	0.005186	4.6e-05	0.000508
		F	X	0.002737	0.004806	5.1e-05	0.00065
		Q	X	0.002499	0.00434	5.4e-05	0.000773
		A	X	0.002225	0.003591	5.1e-05	0.001118
		L	X	0.002104	0.003287	6.1e-05	0.000486
		N	X	0.001922	0.002802	6.4e-05	0.000753
		A	X	0.001732	0.00209	6.5e-05	0.001011
		R	X	0.001586	0.001536	6.8e-05	0.000808
		A	X	0.001362	0.000617	4.7e-05	0.001314
		A	X	0.001322	0.000578	5.4e-05	0.00012
B1Z6U1	Filamentous haemagglutinin family protein	M	S	0.788628	0.040152	0.00427	1.4e-05
		N	S	0.788745	0.040114	0.004212	3.3e-05
		H	S	0.788837	0.040086	0.004166	1.7e-05
		H	S	0.788915	0.040065	0.004126	6e-06
		L	S	0.788983	0.040046	0.004089	2e-06
		T	S	0.789041	0.040029	0.004052	3e-06
		A	S	0.789097	0.040012	0.004015	4e-06
		L	S	0.789153	0.039997	0.00398	5e-06
		S	S	0.789208	0.039984	0.003948	7e-06
		H	S	0.789261	0.039971	0.003916	1.5e-05
		S	S	0.78932	0.039961	0.003886	1.3e-05
		D	S	0.789379	0.039953	0.003856	1.6e-05
		S	S	0.789429	0.039943	0.003818	3.8e-05
		A	S	0.789408	0.039914	0.003731	0.000173
		A	S	0.789378	0.039867	0.003633	0.000242
		R	S	0.789381	0.039834	0.003538	0.000214
		P	S	0.789342	0.039793	0.003396	0.000313
		L	S	0.789265	0.039771	0.003317	0.000293
		W	S	0.789269	0.039749	0.003256	0.000188
		M	S	0.789287	0.039735	0.003182	0.000185
		R	S	0.789297	0.039729	0.003116	0.000189
		V	S	0.789357	0.039715	0.003065	0.000144
		T	S	0.789373	0.039702	0.002987	0.000211
		A	S	0.789219	0.039672	0.002805	0.0005
		I	S	0.789342	0.039691	0.002766	8.4e-05
		L	S	0.789439	0.039703	0.002734	7.5e-05
		M	S	0.78952	0.039727	0.00271	6.6e-05
		V	S	0.789555	0.039751	0.002665	0.000123
		A	S	0.789442	0.03978	0.002398	0.000481
		V	S	0.789397	0.039822	0.002289	0.000238
		T	S	0.789301	0.039868	0.0022	0.000263
		Y	S	0.789229	0.039919	0.002141	0.000199
		F	S	0.788927	0.039964	0.002047	0.000457
		A	S	0.788525	0.040006	0.001941	0.000558
		P	S	0.787808	0.04004	0.00181	0.000887
		A	S	0.785148	0.039997	0.001404	0.003164
		V	S	0.784676	0.040029	0.001365	0.000535
		F	S	0.782532	0.040031	0.001269	0.002275
		L	S	0.738163	0.039739	0.001187	0.04477
		A	S	0.542532	0.034451	0.000588	0.201625
		D	S	0.540605	0.034512	0.000515	0.002169
		E	S	0.538343	0.034489	0.000461	0.002455
		V	S	0.536016	0.034427	0.000412	0.002571
		A	S	0.532019	0.034226	0.000284	0.004464
		N	S	0.524313	0.03402	0.000211	0.008104
		A	C	0.023057	0.002813	8.5e-05	0.533074
		A	X	0.019619	0.002557	7.1e-05	0.003815
		P	X	0.016609	0.002265	6.2e-05	0.003344
		I	X	0.014504	0.002024	6e-05	0.00237
		V	X	0.013361	0.001856	6.2e-05	0.00133
		D	X	0.0126	0.001794	6.9e-05	0.000843
		P	X	0.010516	0.001571	6.5e-05	0.002363
		R	X	0.007616	0.001318	4.6e-05	0.003246
		A	X	0.006371	0.001133	4.5e-05	0.001466
		P	X	0.005435	0.001014	4.6e-05	0.001076
		I	X	0.00489	0.000925	4.8e-05	0.000652
		P	X	0.004345	0.000837	5e-05	0.000651
		F	X	0.003774	0.000753	5.1e-05	0.000681
		Q	X	0.003419	0.000677	5.3e-05	0.00045
		P	X	0.003058	0.000622	5.5e-05	0.000438
		T	X	0.002698	0.000562	5.7e-05	0.000446
		I	X	0.002418	0.000513	5.8e-05	0.000352
		T	X	0.002178	0.000466	5.9e-05	0.000317
		Q	X	0.001927	0.00042	6e-05	0.000332
		T	X	0.001708	0.00038	6e-05	0.000295
		S	X	0.001449	0.000339	5.8e-05	0.000343
		A	X	0.001142	0.00029	5.2e-05	0.000411
		G	X	0.000923	0.000249	4.9e-05	0.000299
		I	X	0.000803	0.000215	4.9e-05	0.000186
		P	X	0.000732	0.00021	5.4e-05	0.000107
B3FNS7	Trimeric autotransporter adhesin protein	M	X	0.08468	0.015879	0.017936	2.1e-05
		N	X	0.084636	0.015833	0.017832	4.4e-05
		K	X	0.084598	0.0158	0.017748	2.6e-05
		I	X	0.084564	0.015774	0.017679	1.1e-05
		F	X	0.08453	0.015752	0.017616	7e-06
		K	X	0.084496	0.015732	0.017555	9e-06
		I	X	0.084462	0.015715	0.0175	9e-06
		I	X	0.084429	0.015701	0.017449	7e-06
		W	X	0.084398	0.01569	0.017402	9e-06
		N	X	0.084366	0.015682	0.017358	1.3e-05
		K	X	0.084326	0.015676	0.017316	2.5e-05
		T	X	0.084289	0.015673	0.017276	2.4e-05
		T	X	0.084247	0.015671	0.017232	3.5e-05
		Q	X	0.084188	0.015671	0.017182	5.8e-05
		R	X	0.084075	0.01567	0.017103	0.000144
		L	X	0.084014	0.015676	0.017053	6.9e-05
		E	X	0.083937	0.01568	0.017001	8.9e-05
		V	X	0.083846	0.015684	0.016935	0.000118
		V	X	0.083676	0.015687	0.016813	0.000254
		S	X	0.083148	0.015686	0.016113	0.001195
		E	X	0.082748	0.015691	0.01564	0.000842
		L	X	0.082145	0.01569	0.014644	0.001574
		A	X	0.081306	0.015682	0.012269	0.003198
		K	X	0.080249	0.015677	0.011052	0.002257
		S	X	0.07858	0.015657	0.009475	0.003243
		Q	X	0.077864	0.015664	0.008976	0.001201
		G	X	0.075942	0.015637	0.007627	0.003281
		K	X	0.074708	0.015634	0.006823	0.002043
		A	X	0.072895	0.015575	0.005804	0.002882
		T	X	0.072404	0.015581	0.005564	0.00073
		V	X	0.071808	0.015575	0.005353	0.000814
		S	X	0.070974	0.01557	0.004996	0.001203
		T	X	0.070107	0.015556	0.004711	0.001179
		D	X	0.069643	0.015567	0.004566	0.000615
		K	X	0.069081	0.015571	0.004349	0.000794
		R	X	0.068223	0.015563	0.004104	0.001132
		A	X	0.066838	0.015508	0.00347	0.002097
		E	X	0.066396	0.01552	0.003365	0.00057
		V	X	0.065979	0.015515	0.003291	0.000526
		T	X	0.065502	0.015519	0.003056	0.000746
		S	X	0.064573	0.015493	0.002654	0.001403
		A	X	0.063262	0.015452	0.002281	0.001786
		V	X	0.062876	0.01548	0.002236	0.000471
		D	X	0.062598	0.015502	0.002213	0.000341
		F	X	0.062155	0.015518	0.002145	0.000568
		K	X	0.061733	0.015538	0.002074	0.000557
		K	X	0.061303	0.015562	0.002012	0.000557
		S	X	0.060924	0.015597	0.001959	0.000492
		T	X	0.060583	0.01564	0.001925	0.000433
		L	X	0.060189	0.015677	0.001886	0.000505
		F	X	0.059883	0.015721	0.001864	0.000398
		R	X	0.059462	0.015758	0.001827	0.000541
		A	X	0.058987	0.015793	0.001788	0.000605
		I	X	0.058862	0.015855	0.001795	0.000189
		S	X	0.058547	0.015892	0.001775	0.000428
		L	X	0.058391	0.015947	0.001773	0.000244
		A	X	0.057965	0.015951	0.001743	0.00059
		L	X	0.057847	0.015998	0.001744	0.000217
		G	X	0.057604	0.01599	0.001729	0.000403
		L	X	0.057518	0.016041	0.001712	0.000182
		S	X	0.057287	0.016067	0.001691	0.000347
		A	X	0.056821	0.016062	0.001561	0.000738
		I	X	0.056588	0.016105	0.001557	0.0003
		S	X	0.055636	0.016067	0.001518	0.001138
		L	X	0.055416	0.016109	0.0015	0.000295
		P	X	0.054466	0.016084	0.001445	0.001125
		A	X	0.053304	0.01593	0.001307	0.00155
		G	X	0.05115	0.015796	0.001154	0.002515
		A	X	0.021337	0.007622	0.000958	0.038391
		A	X	0.017225	0.0069	0.000829	0.005061
XP_021194905.1	papilin isoform X5	M	L	0.147502	0.055624	0.602488	2e-05
		T	L	0.147473	0.055583	0.602532	6.7e-05
		A	L	0.147447	0.055556	0.602582	5.2e-05
		F	L	0.147427	0.05554	0.602637	2.4e-05
		N	L	0.147407	0.055525	0.602686	1.6e-05
		F	L	0.147385	0.055511	0.602733	9e-06
		R	L	0.14736	0.055495	0.602774	1.6e-05
		S	L	0.147331	0.05548	0.602811	2.6e-05
		L	L	0.1473	0.055468	0.602839	4.1e-05
		L	L	0.147263	0.055458	0.602852	6.1e-05
		L	L	0.147213	0.055448	0.602825	0.000113
		A	L	0.147107	0.055433	0.60249	0.000478
		A	L	0.147031	0.055391	0.602332	0.000309
		I	L	0.14695	0.055296	0.60222	0.000311
		V	L	0.146849	0.055108	0.602046	0.000479
		L	L	0.146624	0.055024	0.601747	0.000612
		S	L	0.145917	0.054789	0.599176	0.003496
		N	C	0.145069	0.054365	0.015806	0.584928
		C	X	0.141824	0.053599	0.00864	0.011452
		I	X	0.140852	0.05351	0.007857	0.001804
		T	X	0.139484	0.053075	0.007041	0.002579
		W	X	0.138821	0.053057	0.006128	0.001554
		T	X	0.127182	0.050583	0.00454	0.015649
		A	X	0.122412	0.050012	0.001286	0.008548
		S	X	0.111135	0.048839	0.000557	0.01311
		R	X	0.09875	0.046806	0.000241	0.014678
		H	X	0.095922	0.046606	0.000187	0.003035
		H	X	0.093339	0.046086	0.000153	0.003097
		Y	X	0.089283	0.045078	0.000131	0.005051
		A	X	0.065415	0.030556	6.8e-05	0.038454
		H	X	0.063886	0.030292	6.7e-05	0.001773
		N	X	0.055106	0.024439	6.1e-05	0.014636
		V	X	0.053369	0.022765	6.3e-05	0.003415
		H	X	0.05213	0.022086	6.8e-05	0.001924
		Q	X	0.047967	0.019118	6.6e-05	0.007169
		H	X	0.046561	0.018548	7.7e-05	0.001998
		R	X	0.043867	0.016837	8.1e-05	0.004445
		T	X	0.042363	0.015769	9.3e-05	0.002605
		R	X	0.040705	0.014958	0.000104	0.002506
		H	X	0.039461	0.014395	0.000119	0.00184
		R	X	0.036695	0.012899	0.00012	0.004319
		R	X	0.033197	0.011456	0.000116	0.005023
		Q	X	0.030012	0.010136	0.000112	0.004577
		G	X	0.025653	0.008487	9e-05	0.006104
		A	X	0.022737	0.007438	7.9e-05	0.004031
		G	X	0.020478	0.006685	7.4e-05	0.003058
		L	X	0.019073	0.006218	7.5e-05	0.001907
		Y	X	0.018021	0.005861	7.9e-05	0.001442
		L	X	0.017079	0.00554	8.4e-05	0.001303
		P	X	0.015708	0.00496	8.2e-05	0.002004
		A	X	0.013293	0.004127	6.4e-05	0.003339
		S	X	0.012019	0.003832	6.2e-05	0.001617
		Y	X	0.010935	0.003535	6.1e-05	0.001419
		I	X	0.010242	0.003315	6.5e-05	0.000947
		I	X	0.009805	0.003229	7.2e-05	0.000554
		P	X	0.008834	0.00299	7.1e-05	0.001263
		G	X	0.007449	0.002529	5.6e-05	0.001936
		Q	X	0.006756	0.002322	5.7e-05	0.000946
		E	X	0.006122	0.002154	6.2e-05	0.000843
		G	X	0.005234	0.001791	5.6e-05	0.001321
		R	X	0.004241	0.001443	4.6e-05	0.001423
		S	X	0.003331	0.00104	3.1e-05	0.001391
		E	X	0.002743	0.00083	2.6e-05	0.000843
		N	X	0.002144	0.000619	2e-05	0.000851
		D	X	0.001782	0.000488	1.9e-05	0.00052
		G	X	0.00148	0.00037	1.8e-05	0.000448
		G	X	0.00133	0.000304	1.9e-05	0.000239
		W	X	0.001159	0.000248	2.2e-05	0.000256
		G	X	0.000997	0.000144	2.3e-05	0.00031
		E	X	0.000929	0.000148	3e-05	9.1e-05
Q86AS3	EGF-like domain-containing protein	M	S	0.863378	0.000565	0.025041	1.3e-05
		K	S	0.863435	0.000544	0.024976	4.3e-05
		L	S	0.863506	0.000529	0.024926	2.5e-05
		I	S	0.863571	0.000522	0.024888	1e-05
		I	S	0.863623	0.000516	0.024853	5e-06
		N	S	0.863669	0.00051	0.024817	9e-06
		N	S	0.863714	0.000505	0.024776	1.5e-05
		F	S	0.863754	0.000501	0.02472	3.5e-05
		L	S	0.863789	0.000496	0.024642	6.3e-05
		L	S	0.863823	0.000492	0.024547	8.1e-05
		L	S	0.863865	0.000489	0.024499	2.9e-05
		F	S	0.863904	0.000487	0.024455	2.5e-05
		L	S	0.863935	0.000485	0.024403	3.9e-05
		I	S	0.863948	0.000483	0.024327	7.7e-05
		F	S	0.863922	0.000482	0.024162	0.000199
		L	S	0.863784	0.000481	0.023819	0.000484
		S	S	0.86342	0.000482	0.021821	0.002355
		I	S	0.862882	0.000484	0.017823	0.004519
		S	S	0.860897	0.000487	0.014024	0.005744
		I	S	0.859649	0.000492	0.013094	0.002121
		Q	S	0.8583	0.000495	0.012168	0.002211
		F	S	0.854335	0.000498	0.011539	0.00452
		V	S	0.847035	0.000498	0.010879	0.007869
		K	S	0.834099	0.000493	0.002142	0.021553
		S	C	0.120869	8.8e-05	7.9e-05	0.715545
		I	X	0.105966	8.2e-05	4e-05	0.014818
		N	X	0.101658	7.9e-05	3e-05	0.004219
		P	X	0.088198	7.3e-05	2.4e-05	0.013394
		P	X	0.066269	6.4e-05	7e-06	0.021892
		Q	X	0.045283	5.5e-05	3e-06	0.020943
		D	X	0.035757	5.2e-05	2e-06	0.009486
		E	X	0.026916	4.4e-05	2e-06	0.008817
		F	X	0.02013	3.6e-05	2e-06	0.006772
		D	X	0.016382	3.2e-05	2e-06	0.003737
		C	X	0.01062	2.5e-05	2e-06	0.005761
		L	X	0.008505	2.3e-05	2e-06	0.002111
		I	X	0.007321	2.3e-05	3e-06	0.001183
		N	X	0.006289	2.3e-05	4e-06	0.001034
		I	X	0.005582	2.4e-05	6e-06	0.00071
		I	X	0.004937	2.5e-05	9e-06	0.000649
		N	X	0.004199	2.7e-05	1.2e-05	0.000747
		K	X	0.003424	2.7e-05	1.3e-05	0.000792
		F	X	0.003018	2.9e-05	1.6e-05	0.000415
		N	X	0.002652	3.1e-05	2e-05	0.000377
		Y	X	0.002286	3.4e-05	2.4e-05	0.000378
		K	X	0.001905	3.7e-05	2.7e-05	0.0004
		T	X	0.001691	3.9e-05	3.2e-05	0.000229
		F	X	0.00144	4.2e-05	3.7e-05	0.000268
		D	X	0.001257	4.6e-05	4.4e-05	0.000201
		S	X	0.001098	4.9e-05	4.9e-05	0.000186
		Y	X	0.000936	5e-05	5.3e-05	0.00019
		K	X	0.000765	5e-05	5.4e-05	0.000205
		D	X	0.000678	5.1e-05	5.7e-05	0.000111
		I	X	0.000589	5.2e-05	6.1e-05	0.000114
		T	X	0.000504	5.1e-05	6.3e-05	0.000116
		K	X	0.000433	4.9e-05	6.4e-05	0.000102
		I	X	0.00038	4.7e-05	6.2e-05	8.4e-05
		C	X	0.000326	4.5e-05	6.1e-05	8.3e-05
		S	X	0.000283	4.2e-05	5.8e-05	7.4e-05
		L	X	0.000247	4e-05	5.6e-05	6.2e-05
		T	X	0.000219	3.8e-05	5.2e-05	5.6e-05
		T	X	0.000197	3.7e-05	5.1e-05	4.3e-05
		W	X	0.000174	3.6e-05	4.9e-05	4.5e-05
		V	X	0.000156	3.6e-05	4.9e-05	3.5e-05
		T	X	0.000134	3.5e-05	4.5e-05	5.4e-05
		C	X	0.000104	3.1e-05	3.5e-05	7.1e-05
		D	X	9.3e-05	3.3e-05	3.5e-05	2.8e-05
		S	X	8.3e-05	3.3e-05	3.3e-05	3.2e-05
		T	X	7.4e-05	3.4e-05	3.3e-05	3.1e-05
		T	X	7e-05	4e-05	3.8e-05	2e-05
P46531.4	Neurogenic locus notch homolog protein	M	S	0.859271	0.007773	0.131183	1.1e-05
		P	S	0.859342	0.007757	0.131145	2.8e-05
		P	S	0.859408	0.007743	0.131112	1.7e-05
		L	S	0.859473	0.007727	0.13108	1e-05
		L	S	0.859535	0.007707	0.131044	1.2e-05
		A	S	0.859579	0.007683	0.13099	5e-05
		P	S	0.859626	0.007656	0.130915	7.3e-05
		L	S	0.859679	0.007631	0.130802	0.000102
		L	S	0.859685	0.007601	0.129949	0.000891
		C	S	0.859682	0.00756	0.128803	0.001205
		L	S	0.859641	0.007528	0.128067	0.000822
		A	S	0.859391	0.007484	0.126559	0.001808
		L	S	0.85914	0.007464	0.125993	0.000849
		L	S	0.858929	0.007456	0.125693	0.000515
		P	S	0.858164	0.007448	0.123739	0.002704
		A	S	0.856141	0.007434	0.079077	0.046657
		L	S	0.852757	0.007432	0.077351	0.00503
		A	C	0.230181	0.003346	0.069378	0.63439
		A	X	0.167142	0.001612	0.008164	0.126152
		R	X	0.145603	0.001447	0.006534	0.023154
		G	X	0.099248	0.000693	0.005422	0.048091
		P	X	0.086687	0.000643	0.004996	0.012943
		R	X	0.069614	0.000524	0.001137	0.020996
		C	X	0.045326	0.00025	0.000171	0.025477
		S	X	0.035551	0.000154	7.3e-05	0.009929
		Q	X	0.030587	0.000131	5.8e-05	0.004974
		P	X	0.017185	9.6e-05	2.8e-05	0.013449
		G	X	0.009462	5.6e-05	7e-06	0.007772
		E	X	0.007748	4.9e-05	4e-06	0.00171
		T	X	0.005809	4.1e-05	3e-06	0.001944
		C	X	0.004565	3.3e-05	2e-06	0.00125
		L	X	0.003843	2.9e-05	2e-06	0.000726
		N	X	0.003227	2.7e-05	2e-06	0.00062
		G	X	0.002709	2.5e-05	2e-06	0.000524
		G	X	0.002494	2.4e-05	3e-06	0.000219
		K	X	0.002146	2.4e-05	3e-06	0.000356
		C	X	0.001881	2.3e-05	5e-06	0.000274
		E	X	0.001652	2.5e-05	7e-06	0.000239
		A	X	0.001191	1.9e-05	4e-06	0.000506
		A	X	0.000981	1.8e-05	4e-06	0.000223
		N	X	0.000848	1.7e-05	5e-06	0.000142
		G	X	0.000661	1.4e-05	5e-06	0.000204
		T	X	0.000547	1.3e-05	6e-06	0.000123
		E	X	0.00044	1.2e-05	8e-06	0.000118
		A	X	0.000302	7e-06	2e-06	0.000171
		C	X	0.000247	6e-06	2e-06	6e-05
		V	X	0.000214	5e-06	3e-06	3.6e-05
		C	X	0.000177	5e-06	3e-06	4.1e-05
		G	X	0.000156	5e-06	4e-06	2.6e-05
		G	X	0.000135	5e-06	4e-06	2.9e-05
		A	X	0.000113	5e-06	5e-06	2.9e-05
		F	X	0.000102	5e-06	5e-06	1.8e-05
		V	X	9e-05	5e-06	7e-06	1.8e-05
		G	X	8.2e-05	5e-06	9e-06	1.5e-05
		P	X	7.3e-05	6e-06	1.2e-05	1.5e-05
		R	X	5.7e-05	5e-06	8e-06	3.9e-05
		C	X	4.3e-05	4e-06	4e-06	3.3e-05
		Q	X	3.6e-05	4e-06	3e-06	1.3e-05
		D	X	3.1e-05	4e-06	3e-06	9e-06
		P	X	2.7e-05	4e-06	4e-06	9e-06
		N	X	2.4e-05	4e-06	5e-06	7e-06
		P	X	2e-05	4e-06	6e-06	1.1e-05
		C	X	1.7e-05	4e-06	5e-06	1.2e-05
		L	X	1.5e-05	5e-06	6e-06	7e-06
		S	X	1.4e-05	5e-06	7e-06	1e-05
		T	X	1.3e-05	6e-06	8e-06	5e-06
		P	X	1.1e-05	6e-06	8e-06	1.5e-05
		C	X	9e-06	6e-06	6e-06	1.7e-05
		K	X	8e-06	7e-06	6e-06	1e-05
		N	X	9e-06	1.1e-05	1.2e-05	2e-06
A2VEC9.2	SCO-spondin protein	M	X	0.357162	0.007411	0.08178	6.6e-05
		L	X	0.357089	0.007373	0.081633	0.000134
		L	X	0.357031	0.007344	0.081511	9.8e-05
		P	X	0.356969	0.007318	0.081394	9.8e-05
		A	X	0.356925	0.007293	0.081282	7.6e-05
		L	X	0.356892	0.00727	0.08117	6.4e-05
		L	X	0.356802	0.007247	0.081029	0.000151
		F	X	0.356666	0.007224	0.080733	0.000355
		G	X	0.356147	0.007197	0.080054	0.001122
		M	X	0.355309	0.00717	0.078882	0.00193
		A	X	0.352255	0.007086	0.0753	0.006592
		W	X	0.350047	0.007054	0.073256	0.004126
		A	X	0.319211	0.006131	0.060908	0.043862
		L	X	0.308726	0.006074	0.055084	0.016105
		A	X	0.159624	0.003653	0.030063	0.176198
		D	X	0.152182	0.003576	0.023736	0.013525
		G	X	0.104719	0.003094	0.007873	0.063566
		R	X	0.097817	0.003038	0.005898	0.008736
		W	X	0.089315	0.002887	0.001909	0.012485
		C	X	0.048729	0.001344	0.000621	0.043314
		E	X	0.046758	0.001307	0.000558	0.001989
		W	X	0.04283	0.001218	0.00047	0.004062
		T	X	0.039782	0.001156	0.000421	0.003128
		E	X	0.038474	0.001141	0.00041	0.001315
		T	X	0.03458	0.001036	0.000377	0.004026
		I	X	0.033362	0.001024	0.000374	0.001231
		R	X	0.030054	0.000925	0.000324	0.003469
		V	X	0.026265	0.000729	0.000286	0.004039
		E	X	0.02376	0.000643	0.000258	0.002635
		E	X	0.020636	0.000547	0.000223	0.003278
		E	X	0.018424	0.0005	0.000191	0.002311
		V	X	0.016477	0.000462	0.000176	0.002024
		A	X	0.014524	0.000423	0.000158	0.002035
		P	X	0.01185	0.000352	0.000115	0.002826
		R	X	0.009128	0.000271	6.8e-05	0.002893
		Q	X	0.00742	0.000221	4.6e-05	0.001806
		E	X	0.006179	0.000184	4e-05	0.001305
		D	X	0.005212	0.00016	3.7e-05	0.001013
		L	X	0.004373	0.000139	3.3e-05	0.000884
		V	X	0.004034	0.000137	3.6e-05	0.000353
		P	X	0.003429	0.000124	2.8e-05	0.000656
		C	X	0.002685	0.000102	1.9e-05	0.000811
		A	X	0.002368	9.9e-05	2e-05	0.000342
		S	X	0.002011	9.1e-05	1.9e-05	0.000393
		L	X	0.00174	8.6e-05	1.9e-05	0.0003
		D	X	0.001613	8.7e-05	2.2e-05	0.000141
		H	X	0.001495	8.9e-05	2.8e-05	0.000136
		Y	X	0.001341	8.9e-05	3e-05	0.000187
		S	X	0.001213	8.9e-05	3.3e-05	0.000164
		R	X	0.001083	8.7e-05	3.5e-05	0.000167
		L	X	0.00095	8.4e-05	3.6e-05	0.000173
		G	X	0.000857	8.5e-05	3.7e-05	0.000127
		W	X	0.000784	8.7e-05	4e-05	0.000103
		R	X	0.000685	8.4e-05	3.9e-05	0.000146
		L	X	0.000622	8.5e-05	4.1e-05	9.5e-05
		D	X	0.000584	8.9e-05	4.5e-05	6.1e-05
		L	X	0.000558	9.5e-05	5.1e-05	4.7e-05
		P	X	0.000522	9.9e-05	5.6e-05	6.8e-05
		W	X	0.000481	0.000102	5.9e-05	8.4e-05
		S	X	0.000443	0.000104	6.3e-05	8.1e-05
		G	X	0.00041	0.000106	6.6e-05	8.1e-05
		R	X	0.000369	0.000104	6.4e-05	0.000108
		S	X	0.000339	0.000104	6.5e-05	7.9e-05
		G	X	0.000311	0.000103	6.5e-05	8.2e-05
		L	X	0.000287	0.000103	6.6e-05	7.6e-05
		T	X	0.000263	0.000102	6.8e-05	7.8e-05
		R	X	0.000237	9.7e-05	6.5e-05	0.0001
		S	X	0.000218	9.1e-05	6.4e-05	8.9e-05
		P	X	0.000199	8.4e-05	6e-05	0.0001
		A	X	0.000194	8.7e-05	6.8e-05	5.6e-05
P06620.1	Ice nucleation protein	M	X	0.070609	0.0657	0.008417	2e-05
		N	X	0.070574	0.065661	0.008319	4.5e-05
		L	X	0.070545	0.065635	0.008248	1.8e-05
		D	X	0.070518	0.065614	0.008186	8e-06
		K	X	0.070491	0.065596	0.008126	8e-06
		A	X	0.070464	0.06558	0.008067	9e-06
		L	X	0.070438	0.065569	0.008014	7e-06
		V	X	0.07041	0.06556	0.007962	9e-06
		L	X	0.070372	0.065554	0.007912	2e-05
		R	X	0.070289	0.065551	0.00786	6.7e-05
		T	X	0.069905	0.065547	0.007746	0.000435
		C	X	0.068559	0.065544	0.007544	0.001493
		A	X	0.067383	0.065536	0.007317	0.001355
		N	X	0.066915	0.065554	0.007219	0.000523
		N	X	0.066097	0.065566	0.007124	0.000868
		M	X	0.064743	0.065571	0.006898	0.001543
		A	X	0.059124	0.06555	0.005798	0.006702
		D	X	0.058069	0.065584	0.005528	0.001288
		H	X	0.054384	0.065579	0.003595	0.005608
		C	X	0.05135	0.065572	0.002683	0.003949
		G	X	0.048929	0.0656	0.001943	0.003145
		L	X	0.047531	0.065626	0.001731	0.001602
		I	X	0.046848	0.065671	0.001683	0.000715
		W	X	0.046254	0.065724	0.00164	0.000622
		P	X	0.043655	0.065757	0.001494	0.002752
		A	X	0.042272	0.065815	0.001129	0.001751
		S	X	0.04147	0.065888	0.001042	0.000878
		G	X	0.039633	0.065934	0.000435	0.002459
		T	X	0.039036	0.066032	0.000385	0.000649
		V	X	0.038809	0.066124	0.000375	0.000232
		E	X	0.038408	0.066214	0.000334	0.000448
		S	X	0.035885	0.066274	0.000224	0.002675
		R	X	0.035376	0.066377	0.000193	0.000561
		Y	X	0.035091	0.066487	0.000179	0.000317
		W	X	0.034609	0.066606	0.000144	0.000543
		Q	X	0.034221	0.066745	0.000122	0.000439
		S	X	0.033943	0.066906	0.000112	0.00032
		T	X	0.033754	0.067096	0.000108	0.000226
		R	X	0.03347	0.067295	9.8e-05	0.00033
		R	X	0.033094	0.067486	9.1e-05	0.000434
		H	X	0.032828	0.067705	8.1e-05	0.000318
		E	X	0.032664	0.067942	7.8e-05	0.000213
		N	X	0.032521	0.068213	7.5e-05	0.000196
		G	X	0.032348	0.068501	7e-05	0.000251
		L	X	0.032264	0.068848	7e-05	0.000141
		V	X	0.032201	0.069205	7.1e-05	0.000124
		G	X	0.032097	0.069595	7.1e-05	0.00018
		L	X	0.032029	0.070047	7.3e-05	0.000145
		L	X	0.031968	0.070552	7.6e-05	0.00014
		W	X	0.031876	0.0711	7.9e-05	0.000175
		G	X	0.031595	0.071609	7.7e-05	0.000423
		A	X	0.031528	0.072181	7.7e-05	0.00017
		G	X	0.031534	0.072596	7.4e-05	0.000109
		T	X	0.031561	0.072906	7.5e-05	8.1e-05
		S	X	0.031568	0.073138	7.3e-05	0.000106
		A	X	0.031382	0.073184	5.9e-05	0.000441
		F	X	0.03139	0.073298	5.9e-05	0.000118
		L	X	0.031304	0.073344	5.9e-05	0.000258
		S	X	0.031264	0.073372	5.5e-05	0.000227
		V	X	0.03124	0.073391	5.3e-05	0.000186
		H	X	0.031146	0.073388	5.4e-05	0.000227
		A	X	0.01051	0.026263	2.4e-05	0.068228
		D	X	0.010324	0.026109	2.9e-05	0.000425
		A	X	0.001124	0.002915	1.4e-05	0.032767
		R	X	0.000898	0.002183	1.2e-05	0.00098
		W	X	0.000696	0.001108	1e-05	0.00129
		I	X	0.00062	0.000878	1e-05	0.000311
		V	X	0.000536	0.000681	1.1e-05	0.000295
		C	X	0.000457	0.000495	1.4e-05	0.000292
		E	X	0.000433	0.000476	2.1e-05	6.3e-05
G0SBQ3.1	Nucleoporin NSP1	M	X	0.368062	0.1031	0.044386	0.000333
		S	X	0.367195	0.103051	0.044281	0.000941
		F	X	0.366405	0.103023	0.044155	0.000898
		T	X	0.365683	0.102997	0.044069	0.000785
		F	X	0.365159	0.102972	0.043982	0.000586
		G	X	0.364365	0.102944	0.043842	0.000913
		Q	X	0.364172	0.102923	0.043734	0.000287
		P	X	0.363604	0.102904	0.04365	0.000639
		S	X	0.363084	0.102885	0.043545	0.000614
		T	X	0.362286	0.10287	0.043444	0.000884
		S	X	0.360188	0.10284	0.043083	0.002449
		G	X	0.350921	0.102462	0.038674	0.013997
		A	X	0.339367	0.102028	0.034533	0.016081
		S	X	0.324788	0.101391	0.03264	0.017059
		G	X	0.302011	0.099817	0.017825	0.039122
		Q	X	0.287041	0.098959	0.015727	0.017899
		S	X	0.270019	0.097632	0.013623	0.020412
		N	X	0.260135	0.096931	0.012624	0.011565
		T	X	0.247127	0.0957	0.011489	0.015349
		S	X	0.236439	0.095025	0.010654	0.012184
		T	X	0.223202	0.093947	0.009699	0.015257
		A	X	0.209734	0.092639	0.00857	0.015896
		P	X	0.188678	0.091743	0.007787	0.02273
		A	X	0.159881	0.087375	0.005803	0.035138
		S	X	0.149037	0.086229	0.005389	0.012422
		G	X	0.127058	0.082662	0.003923	0.027007
		G	X	0.116608	0.081048	0.00334	0.012668
		L	X	0.109657	0.079906	0.003089	0.008358
		F	X	0.102938	0.078702	0.002831	0.008194
		G	X	0.092474	0.076132	0.002025	0.013864
		S	X	0.087053	0.074301	0.001631	0.007682
		T	X	0.083205	0.073359	0.001476	0.004969
		T	X	0.080279	0.072837	0.001355	0.003593
		G	X	0.07634	0.071788	0.000914	0.005459
		S	X	0.072584	0.070793	0.000801	0.004886
		S	X	0.069246	0.069988	0.000738	0.004221
		T	X	0.066888	0.069385	0.000717	0.002999
		P	X	0.062663	0.068546	0.00065	0.005148
		A	X	0.055532	0.06122	0.000403	0.014738
		F	X	0.052734	0.060435	0.000385	0.003616
		S	X	0.031571	0.038172	0.000211	0.043675
		F	X	0.028627	0.035763	0.000192	0.005393
		G	X	0.022813	0.028757	0.000115	0.01292
		N	X	0.020601	0.026451	0.0001	0.004543
		T	X	0.018256	0.02443	9.3e-05	0.004381
		S	X	0.016338	0.023047	8.9e-05	0.003318
		G	X	0.013916	0.020354	7.4e-05	0.005155
		T	X	0.012392	0.018016	7e-05	0.003886
		Q	X	0.011205	0.017107	7.1e-05	0.002115
		S	X	0.009411	0.014636	6.6e-05	0.004299
		G	X	0.008438	0.013213	6.4e-05	0.002425
		S	X	0.00748	0.011603	6.4e-05	0.002598
		L	X	0.006717	0.010526	6.6e-05	0.001868
		F	X	0.005907	0.009447	6.8e-05	0.001923
		G	X	0.004897	0.007921	6.5e-05	0.002581
		G	X	0.00399	0.006281	5.7e-05	0.002607
		A	X	0.003186	0.004602	4.6e-05	0.002543
		T	X	0.002784	0.004108	4.7e-05	0.000923
		T	X	0.002414	0.003733	4.8e-05	0.000773
		G	X	0.002003	0.002972	4.4e-05	0.001219
		Q	X	0.001679	0.002359	4.1e-05	0.000975
		K	X	0.001428	0.001964	4e-05	0.000674
		T	X	0.001271	0.001546	4e-05	0.000601
		S	X	0.001138	0.001326	4.2e-05	0.000378
		L	X	0.001017	0.001093	4.3e-05	0.000384
		F	X	0.000897	0.00088	4.3e-05	0.000368
		G	X	0.000773	0.000651	4.3e-05	0.000392
		N	X	0.000665	0.000544	4.5e-05	0.000248
		T	X	0.000588	0.00038	4.7e-05	0.000279
		S	X	0.000551	0.000361	5.2e-05	9.1e-05
B0FXJ3	Ice nucleation protein	M	X	0.035407	0.03062	0.004779	2e-05
		N	X	0.035367	0.030569	0.004677	4.5e-05
		L	X	0.035334	0.030533	0.004603	1.8e-05
		D	X	0.035303	0.030502	0.004538	7e-06
		K	X	0.035272	0.030475	0.004475	7e-06
		A	X	0.035241	0.03045	0.004415	9e-06
		L	X	0.035212	0.03043	0.004359	6e-06
		V	X	0.035182	0.030412	0.004304	7e-06
		L	X	0.035149	0.030398	0.004252	1e-05
		R	X	0.035103	0.030386	0.004199	2.7e-05
		T	X	0.034982	0.030373	0.004113	0.000138
		C	X	0.03467	0.030359	0.003998	0.000369
		A	X	0.034317	0.030334	0.003848	0.000454
		N	X	0.034141	0.030341	0.003783	0.000192
		N	X	0.033902	0.030342	0.00372	0.000254
		M	X	0.03333	0.030337	0.003556	0.000697
		A	X	0.031819	0.030294	0.002931	0.00213
		D	X	0.031456	0.030313	0.002799	0.000454
		H	X	0.030427	0.030292	0.001839	0.001981
		C	X	0.029491	0.030259	0.001354	0.001429
		G	X	0.028849	0.030262	0.001	0.000983
		L	X	0.028424	0.030277	0.000894	0.000511
		I	X	0.028177	0.030302	0.000864	0.000257
		W	X	0.02797	0.030336	0.000837	0.000213
		P	X	0.027171	0.030347	0.000739	0.0009
		A	X	0.026641	0.030384	0.000556	0.000707
		S	X	0.026338	0.030432	0.000513	0.00033
		G	X	0.025658	0.030439	0.000169	0.001047
		T	X	0.025377	0.030516	0.000144	0.000299
		V	X	0.025251	0.030582	0.000138	0.00012
		E	X	0.02506	0.030644	0.000122	0.000204
		S	X	0.023977	0.030664	6.5e-05	0.001187
		K	X	0.023814	0.030738	6.1e-05	0.000174
		Y	X	0.023706	0.030809	5.8e-05	0.000124
		W	X	0.023582	0.030894	5e-05	0.000143
		Q	X	0.023437	0.030986	4.3e-05	0.000171
		S	X	0.023308	0.03109	4e-05	0.000161
		T	X	0.023201	0.031217	4e-05	0.000131
		R	X	0.023082	0.031349	3.8e-05	0.000152
		R	X	0.022915	0.031444	3.5e-05	0.000243
		H	X	0.022816	0.031593	3.3e-05	0.000135
		E	X	0.022733	0.031742	3.3e-05	0.000132
		N	X	0.02266	0.031908	3.2e-05	0.000129
		G	X	0.022571	0.032015	3e-05	0.000228
		L	X	0.022534	0.032238	3.1e-05	9.2e-05
		V	X	0.022506	0.032458	3.2e-05	9e-05
		G	X	0.022461	0.032669	3.3e-05	0.000151
		L	X	0.022437	0.03294	3.5e-05	0.000109
		L	X	0.022417	0.033258	3.8e-05	8.4e-05
		W	X	0.022391	0.033615	4.1e-05	8.1e-05
		G	X	0.022296	0.033842	4e-05	0.000288
		A	X	0.022274	0.034183	4.1e-05	9.2e-05
		G	X	0.022283	0.034415	4e-05	9.8e-05
		T	X	0.022302	0.034613	4e-05	6.4e-05
		S	X	0.022312	0.034767	4e-05	8.3e-05
		A	X	0.022207	0.034761	3.4e-05	0.000328
		F	X	0.02222	0.034845	3.5e-05	7.4e-05
		L	X	0.022192	0.0349	3.5e-05	0.000126
		S	X	0.022188	0.034955	3.3e-05	9.7e-05
		V	X	0.022183	0.034989	3.2e-05	9.5e-05
		H	X	0.022135	0.034997	3.2e-05	0.000129
		A	X	0.008018	0.011224	1.7e-05	0.038206
		D	X	0.00789	0.011129	1.9e-05	0.000266
		A	X	0.000906	0.001855	1.2e-05	0.016479
		R	X	0.000778	0.001563	1.2e-05	0.00043
		W	X	0.000675	0.001153	1.2e-05	0.000524
		I	X	0.000595	0.001035	1.4e-05	0.000207
		V	X	0.000531	0.000893	1.7e-05	0.000217
		R	X	0.00045	0.000624	1.7e-05	0.000378
		E	X	0.000424	0.00059	2.3e-05	7.7e-05
WP_057332199.1	PE family protein	M	S	0.428561	0.166859	0.035873	7.5e-05
		V	S	0.428492	0.166866	0.035777	0.000133
		M	S	0.428419	0.166871	0.03568	0.000128
		S	S	0.42829	0.166865	0.035568	0.000208
		L	S	0.428218	0.166885	0.035487	0.000121
		M	S	0.42814	0.166897	0.035407	0.000121
		V	S	0.42804	0.16691	0.035328	0.000144
		A	S	0.427832	0.166924	0.035222	0.000277
		P	S	0.427532	0.166941	0.035072	0.000418
		E	S	0.427362	0.166968	0.034858	0.000347
		L	S	0.427126	0.166991	0.034677	0.000375
		V	S	0.426701	0.167011	0.034386	0.000672
		A	S	0.42359	0.166977	0.031398	0.006088
		A	S	0.40632	0.166753	0.027817	0.021009
		A	S	0.383742	0.166485	0.023566	0.027029
		A	S	0.333471	0.165322	0.017192	0.057772
		A	S	0.307026	0.16434	0.009423	0.035204
		D	S	0.304524	0.164337	0.009055	0.002922
		L	S	0.301779	0.164237	0.008692	0.003229
		T	S	0.299644	0.164196	0.008338	0.002577
		G	S	0.296867	0.164099	0.00761	0.003654
		I	S	0.295675	0.164081	0.007463	0.001409
		G	S	0.293266	0.163986	0.007014	0.003
		Q	S	0.291344	0.16392	0.006646	0.002397
		A	S	0.286394	0.163382	0.006008	0.006155
		I	S	0.285243	0.163326	0.005845	0.001404
		S	S	0.278808	0.162823	0.005269	0.007519
		A	S	0.262941	0.160326	0.004205	0.019431
		A	S	0.256078	0.158703	0.003413	0.00934
		N	S	0.252354	0.158406	0.003215	0.004233
		A	C	0.190436	0.129178	0.002423	0.09194
		A	X	0.18121	0.126934	0.001928	0.012331
		A	X	0.113022	0.103612	0.001334	0.092197
		A	X	0.069667	0.08523	0.000754	0.062549
		G	X	0.062907	0.081187	0.000604	0.011017
		P	X	0.057899	0.079035	0.000517	0.007272
		T	X	0.053975	0.077305	0.000444	0.005767
		T	X	0.051924	0.076433	0.000426	0.002992
		Q	X	0.049925	0.075494	0.000428	0.003012
		V	X	0.048164	0.074326	0.000435	0.003008
		L	X	0.045934	0.073355	0.000434	0.00331
		A	X	0.030446	0.051553	0.000337	0.037582
		A	X	0.025382	0.042744	0.000274	0.014114
		A	X	0.018183	0.029458	0.000192	0.020733
		G	X	0.014124	0.022921	0.000128	0.010778
		D	X	0.012645	0.021336	0.000125	0.003124
		E	X	0.011818	0.020505	0.000134	0.001708
		V	X	0.010866	0.018637	0.000142	0.002885
		S	X	0.009549	0.016271	0.000144	0.003781
		A	X	0.007407	0.012066	0.000105	0.006562
		A	X	0.006055	0.00902	8.7e-05	0.004553
		I	X	0.005374	0.008159	9e-05	0.001606
		A	X	0.003779	0.005258	5.1e-05	0.004656
		A	X	0.003035	0.004239	3.5e-05	0.001841
		L	X	0.002665	0.003819	3.3e-05	0.000826
		F	X	0.002375	0.003444	3.2e-05	0.000703
		G	X	0.002135	0.003174	3.3e-05	0.000555
		T	X	0.002015	0.003026	3.9e-05	0.00031
		H	X	0.001848	0.002855	5.1e-05	0.000399
		A	X	0.001093	0.002058	2.4e-05	0.001771
		Q	X	0.000967	0.00192	2.3e-05	0.000317
		E	X	0.000865	0.001808	2.6e-05	0.000251
		Y	X	0.00078	0.001646	3e-05	0.000288
		Q	X	0.000694	0.001449	3.5e-05	0.000333
		A	X	0.00061	0.00119	3.9e-05	0.000404
		L	X	0.000565	0.00107	4.9e-05	0.000213
		S	X	0.000463	0.000809	4.7e-05	0.000458
		A	X	0.000379	0.00054	4.4e-05	0.000453
		R	X	0.000314	0.000303	4e-05	0.000376
		V	X	0.0003	0.000273	4.8e-05	8.2e-05
L7VCL1	PE-PGRS family protein	M	X	0.147452	0.088755	0.010359	3.6e-05
		S	X	0.147392	0.08872	0.010245	9e-05
		W	X	0.147349	0.088709	0.010158	5.3e-05
		V	X	0.147316	0.088702	0.010084	2.9e-05
		I	X	0.14726	0.088698	0.010012	4.8e-05
		A	X	0.146973	0.088684	0.009928	0.000305
		A	X	0.146687	0.088676	0.009829	0.00032
		P	X	0.146329	0.088681	0.009724	0.000407
		E	X	0.146069	0.088687	0.009644	0.000285
		Y	X	0.145727	0.088693	0.009551	0.000379
		V	X	0.145316	0.088699	0.009435	0.000474
		A	X	0.143482	0.088692	0.008575	0.002655
		A	X	0.134811	0.088616	0.006657	0.010609
		A	X	0.120917	0.088336	0.00493	0.015864
		A	X	0.111364	0.088118	0.003389	0.011297
		N	X	0.109319	0.088091	0.003233	0.002255
		D	X	0.107753	0.088074	0.003117	0.001712
		L	X	0.106245	0.088073	0.002978	0.001679
		G	X	0.104319	0.088002	0.002727	0.002285
		S	X	0.102399	0.087934	0.002542	0.002219
		I	X	0.101255	0.087918	0.002458	0.00129
		G	X	0.099584	0.087831	0.002248	0.002014
		S	X	0.098456	0.087796	0.002128	0.001331
		T	X	0.097352	0.087724	0.002033	0.001313
		L	X	0.096635	0.087714	0.001949	0.000849
		A	X	0.093973	0.087503	0.001663	0.003189
		Q	X	0.092647	0.087463	0.001533	0.001535
		A	X	0.087232	0.086482	0.001219	0.006721
		N	X	0.086194	0.086462	0.001159	0.001211
		A	X	0.066611	0.081402	0.000932	0.024903
		A	X	0.064635	0.081075	0.000752	0.002708
		A	X	0.057383	0.07854	0.000454	0.010139
		L	X	0.055353	0.078074	0.000347	0.0027
		A	X	0.051898	0.076799	0.000228	0.004889
		P	X	0.050885	0.076494	0.000184	0.00141
		I	X	0.050377	0.076385	0.000172	0.000667
		T	X	0.050047	0.076346	0.000166	0.000415
		T	X	0.049546	0.076214	0.000159	0.000684
		V	X	0.049212	0.076121	0.000157	0.000476
		L	X	0.048918	0.076058	0.000158	0.000404
		P	X	0.047232	0.075251	0.000136	0.002562
		A	X	0.045824	0.073168	0.000106	0.003572
		G	X	0.044587	0.072772	8.9e-05	0.001693
		A	X	0.01235	0.032816	5.5e-05	0.072356
		D	X	0.011925	0.032304	6.7e-05	0.000986
		E	X	0.011362	0.031054	7.2e-05	0.00184
		V	X	0.010813	0.029224	7.6e-05	0.002414
		S	X	0.009969	0.028034	8e-05	0.002085
		A	X	0.005985	0.018167	4.8e-05	0.014011
		A	X	0.004866	0.015065	3.7e-05	0.004323
		I	X	0.00454	0.014561	4.1e-05	0.000864
		S	X	0.00419	0.013934	4e-05	0.001016
		F	X	0.004023	0.013741	4.4e-05	0.000399
		L	X	0.003817	0.013472	4.6e-05	0.000522
		F	X	0.003691	0.013324	5e-05	0.000324
		G	X	0.003471	0.012964	5.4e-05	0.000644
		A	X	0.003277	0.012521	6e-05	0.000708
		H	X	0.00319	0.01243	7.8e-05	0.000246
		A	X	0.002559	0.010534	5.7e-05	0.002715
		Q	X	0.002407	0.010277	6.3e-05	0.000488
		A	X	0.001612	0.00801	3.5e-05	0.003267
		Y	X	0.001506	0.007785	3.7e-05	0.000367
		Q	X	0.001293	0.007012	3.7e-05	0.001044
		A	X	0.001158	0.006238	3.8e-05	0.000962
		L	X	0.001086	0.005914	4.4e-05	0.000437
		S	X	0.000928	0.004792	4.4e-05	0.001358
		A	X	0.000808	0.003556	4.3e-05	0.001437
		Q	X	0.000728	0.002759	4.7e-05	0.000951
		A	X	0.000557	0.001388	3.7e-05	0.001685
		A	X	0.00053	0.001261	4.2e-05	0.000189
P10079	Fibropellin-1	M	S	0.905124	0.000166	0.093005	2e-06
		R	S	0.905167	0.00016	0.092955	1.9e-05
		T	S	0.905223	0.000156	0.092915	1.2e-05
		W	S	0.905275	0.000153	0.092878	8e-06
		L	S	0.905323	0.000151	0.092844	4e-06
		L	S	0.905367	0.000148	0.092811	3e-06
		A	S	0.905407	0.000147	0.092775	7e-06
		V	S	0.905448	0.000145	0.092742	5e-06
		L	S	0.905479	0.000143	0.092701	1.8e-05
		L	S	0.905487	0.000142	0.092649	5.1e-05
		L	S	0.90542	0.00014	0.092568	0.000151
		S	S	0.905086	0.000137	0.092132	0.000769
		V	S	0.904753	0.000134	0.091429	0.001033
		I	S	0.903774	0.000134	0.090713	0.001676
		A	S	0.898841	0.000124	0.086242	0.009372
		V	S	0.895855	0.000124	0.082471	0.006693
		T	S	0.890894	0.000123	0.070151	0.017175
		Y	S	0.882769	0.000124	0.066296	0.011821
		G	S	0.712621	0.000105	0.030171	0.206077
		Q	S	0.694599	0.000106	0.028594	0.019398
		G	S	0.529784	8.9e-05	0.021244	0.172
		E	S	0.517807	9.1e-05	0.000284	0.032795
		C	C	0.085685	3.4e-05	0.000104	0.432275
		D	X	0.07618	3.1e-05	6.7e-05	0.00947
		S	X	0.030312	1.6e-05	4.5e-05	0.045862
		D	X	0.027351	1.5e-05	4.1e-05	0.002936
		P	X	0.019235	1e-05	2.2e-05	0.008124
		C	X	0.013425	6e-06	1.2e-05	0.005814
		E	X	0.011378	6e-06	1.1e-05	0.002042
		N	X	0.00895	5e-06	7e-06	0.002432
		G	X	0.006183	3e-06	4e-06	0.002772
		S	X	0.004872	3e-06	4e-06	0.001312
		T	X	0.003959	3e-06	3e-06	0.000916
		C	X	0.002902	3e-06	2e-06	0.001062
		Q	X	0.00247	3e-06	2e-06	0.000435
		E	X	0.002036	3e-06	2e-06	0.000438
		G	X	0.001594	3e-06	2e-06	0.000447
		E	X	0.001159	3e-06	2e-06	0.000441
		G	X	0.000832	2e-06	2e-06	0.000333
		S	X	0.000558	2e-06	1e-06	0.000279
		Y	X	0.000423	2e-06	1e-06	0.000138
		I	X	0.000297	1e-06	1e-06	0.000129
		C	X	0.00021	1e-06	0	8.9e-05
		Q	X	0.000171	1e-06	0	4.1e-05
		C	X	0.000146	1e-06	0	2.7e-05
		P	X	0.000133	2e-06	0	1.4e-05
		M	X	0.000118	2e-06	1e-06	1.8e-05
		G	X	0.000105	2e-06	1e-06	1.6e-05
		Y	X	9.6e-05	3e-06	1e-06	1.3e-05
		D	X	8.6e-05	3e-06	2e-06	1.3e-05
		G	X	7.4e-05	3e-06	2e-06	1.7e-05
		Q	X	6.9e-05	4e-06	3e-06	1e-05
		N	X	6e-05	4e-06	3e-06	1.5e-05
		C	X	5.2e-05	5e-06	3e-06	1.5e-05
		D	X	4.9e-05	5e-06	4e-06	7e-06
		R	X	4.3e-05	6e-06	5e-06	1.4e-05
		F	X	3.7e-05	6e-06	6e-06	1.5e-05
		T	X	3.3e-05	6e-06	6e-06	1.2e-05
		G	X	2.8e-05	6e-06	6e-06	1.5e-05
		S	X	2.5e-05	6e-06	6e-06	1e-05
		N	X	2.1e-05	6e-06	5e-06	1.3e-05
		C	X	1.8e-05	6e-06	5e-06	1.3e-05
		G	X	1.6e-05	7e-06	5e-06	7e-06
		Y	X	1.5e-05	8e-06	6e-06	6e-06
		N	X	1.5e-05	9e-06	7e-06	7e-06
		V	X	1.4e-05	1.1e-05	8e-06	7e-06
		F	X	1.3e-05	1.4e-05	1e-05	1.2e-05
		D	X	1.1e-05	1.5e-05	1e-05	2.1e-05
		A	X	9e-06	1.6e-05	9e-06	2.4e-05
		N	X	1e-05	2e-05	1.7e-05	6e-06
Q03650	Cysteine-rich, acidic integral membrane protein	M	X	0.107907	0.005782	0.004413	0.000184
		G	X	0.107687	0.005707	0.004305	0.000308
		N	X	0.107459	0.005653	0.004228	0.000299
		E	X	0.107327	0.005612	0.004172	0.000167
		A	X	0.10714	0.005574	0.004119	0.000221
		G	X	0.106961	0.00554	0.004073	0.000207
		P	X	0.106769	0.005509	0.004028	0.000223
		I	X	0.106427	0.00548	0.00399	0.000372
		F	X	0.105903	0.005452	0.003954	0.000557
		E	X	0.105436	0.005427	0.003917	0.0005
		E	X	0.104355	0.0054	0.003849	0.001149
		S	X	0.103233	0.005374	0.003798	0.001175
		N	X	0.100872	0.005334	0.003552	0.002628
		A	X	0.09625	0.005295	0.0034	0.004795
		E	X	0.093624	0.005237	0.003187	0.002879
		V	X	0.090552	0.005165	0.002942	0.003376
		G	X	0.086367	0.005057	0.002398	0.004829
		T	X	0.082898	0.004979	0.002296	0.003643
		P	X	0.079924	0.004923	0.00221	0.003115
		P	X	0.07427	0.004661	0.001647	0.006486
		A	X	0.069388	0.00438	0.001347	0.00549
		D	X	0.066794	0.004273	0.001197	0.002859
		A	X	0.031263	0.002861	0.000497	0.037679
		V	X	0.02855	0.002735	0.000458	0.002887
		H	X	0.024561	0.002637	0.000382	0.004161
		D	X	0.020085	0.00246	0.000306	0.004735
		D	X	0.019224	0.002413	0.000287	0.000924
		F	X	0.018141	0.002369	0.000276	0.001142
		F	X	0.017153	0.002335	0.000262	0.001043
		F	X	0.016382	0.002308	0.000248	0.000823
		D	X	0.015432	0.002283	0.000232	0.001009
		Y	X	0.013656	0.002227	0.000216	0.001877
		K	X	0.011593	0.002151	0.000181	0.002209
		N	X	0.010659	0.002069	0.000162	0.001054
		A	X	0.009555	0.001901	0.00012	0.001331
		T	X	0.009041	0.001859	0.000109	0.000579
		G	X	0.007642	0.001615	7.7e-05	0.001693
		Y	X	0.00683	0.001541	6.1e-05	0.000915
		A	X	0.002427	0.000489	2.6e-05	0.005518
		D	X	0.002208	0.000471	1.4e-05	0.000252
		D	X	0.00173	0.000436	1.1e-05	0.000523
		C	X	0.001518	0.000399	9e-06	0.000258
		N	X	0.001439	0.000388	1e-05	9.6e-05
		I	X	0.001303	0.000377	1e-05	0.000156
		T	X	0.001147	0.000366	1e-05	0.000177
		G	X	0.000774	0.000314	9e-06	0.000441
		D	X	0.000611	0.000305	8e-06	0.000186
		C	X	0.000418	0.000273	8e-06	0.00024
		N	X	0.000365	0.000261	8e-06	7.7e-05
		E	X	0.000312	0.000249	8e-06	7.8e-05
		T	X	0.000277	0.000228	8e-06	7.2e-05
		D	X	0.000257	0.000224	8e-06	3.5e-05
		D	X	0.000215	0.000216	8e-06	6.5e-05
		C	X	0.000184	0.000192	8e-06	7.1e-05
		D	X	0.000176	0.000189	1e-05	2e-05
		I	X	0.000165	0.000188	1.1e-05	2.6e-05
		T	X	0.000152	0.000182	1.2e-05	3.4e-05
		G	X	0.000127	0.000146	1.3e-05	8.3e-05
		D	X	0.000113	0.00014	1.3e-05	4.1e-05
		C	X	9.3e-05	0.000117	1.3e-05	6.7e-05
		N	X	8.6e-05	0.00011	1.4e-05	3.5e-05
		E	X	7.9e-05	0.000103	1.5e-05	3.3e-05
		T	X	7.4e-05	8.9e-05	1.4e-05	4.6e-05
		D	X	7e-05	8.7e-05	1.5e-05	2.3e-05
		D	X	6.5e-05	8e-05	1.5e-05	3.3e-05
		C	X	6.1e-05	7e-05	1.5e-05	3.7e-05
		N	X	5.9e-05	6.8e-05	1.6e-05	1.9e-05
		I	X	5.8e-05	6.7e-05	1.7e-05	2.1e-05
		T	X	5.6e-05	6.2e-05	1.9e-05	3.2e-05
		G	X	5.8e-05	6.4e-05	2.4e-05	2.3e-05
G0SAK3	Nucleoporin NUP145	M	X	0.439585	0.016548	0.011312	0.001728
		S	X	0.434981	0.016486	0.011177	0.004705
		F	X	0.430735	0.016436	0.011039	0.004363
		G	X	0.426947	0.016391	0.010928	0.003873
		F	X	0.423591	0.016346	0.010795	0.003463
		G	X	0.418043	0.016301	0.010659	0.00566
		S	X	0.413657	0.01626	0.010537	0.004489
		G	X	0.408341	0.016211	0.010398	0.005446
		G	X	0.401322	0.016156	0.010211	0.00721
		F	X	0.391852	0.016103	0.010025	0.009658
		G	X	0.377315	0.016028	0.009718	0.014866
		Q	X	0.367276	0.015955	0.009424	0.010352
		N	X	0.359335	0.01588	0.009195	0.008201
		N	X	0.351546	0.015815	0.008956	0.008046
		N	X	0.339103	0.015718	0.008625	0.012826
		S	X	0.31878	0.015524	0.00802	0.021082
		S	X	0.300094	0.015302	0.0074	0.019483
		T	X	0.281536	0.014911	0.00672	0.019589
		F	X	0.2628	0.014561	0.006177	0.019584
		G	X	0.222278	0.013789	0.005099	0.042318
		G	X	0.190018	0.01331	0.004086	0.033714
		F	X	0.169734	0.012985	0.003418	0.021227
		G	X	0.135387	0.012354	0.002524	0.035824
		S	X	0.112134	0.011863	0.002034	0.024191
		T	X	0.102671	0.011687	0.001857	0.00978
		P	X	0.087407	0.011464	0.00158	0.015741
		T	X	0.076981	0.011218	0.001372	0.010866
		T	X	0.070966	0.011078	0.001262	0.006255
		N	X	0.063162	0.010836	0.001157	0.008149
		T	X	0.054203	0.010578	0.001052	0.009325
		G	X	0.047608	0.010257	0.000871	0.007108
		F	X	0.042717	0.010024	0.000781	0.005227
		G	X	0.034132	0.009552	0.000626	0.009232
		S	X	0.029052	0.009157	0.000565	0.005558
		T	X	0.02582	0.008884	0.000501	0.003587
		G	X	0.022864	0.008604	0.000418	0.00334
		T	X	0.021248	0.008415	0.000393	0.001845
		T	X	0.019674	0.008273	0.000353	0.001773
		A	X	0.01578	0.007417	0.000225	0.004905
		F	X	0.014324	0.007162	0.000191	0.001759
		G	X	0.007359	0.005272	0.000112	0.008963
		S	X	0.006023	0.004627	8.2e-05	0.00202
		T	X	0.005134	0.004189	6.4e-05	0.001347
		S	X	0.00413	0.003487	4.1e-05	0.001735
		N	X	0.00352	0.002939	2.9e-05	0.001171
		T	X	0.002919	0.002257	2.5e-05	0.001291
		T	X	0.00258	0.001968	2.2e-05	0.000633
		G	X	0.002097	0.001656	1.9e-05	0.000803
		G	X	0.001691	0.001365	1.7e-05	0.000705
		G	X	0.001497	0.001235	1.7e-05	0.00033
		L	X	0.00136	0.001089	1.8e-05	0.000291
		F	X	0.001228	0.000968	1.8e-05	0.000262
		G	X	0.001051	0.000793	1.7e-05	0.000366
		G	X	0.000956	0.000664	1.6e-05	0.000235
		G	X	0.000875	0.000614	1.6e-05	0.000141
		G	X	0.00079	0.000581	1.7e-05	0.000127
		G	X	0.000719	0.000559	1.8e-05	0.000104
		G	X	0.000643	0.00053	1.8e-05	0.000117
		F	X	0.000592	0.000514	1.9e-05	8.2e-05
		G	X	0.000506	0.000459	1.9e-05	0.000162
		S	X	0.000437	0.000417	1.9e-05	0.00013
		G	X	0.000369	0.000367	1.9e-05	0.000139
		N	X	0.000308	0.000336	1.9e-05	0.00011
		T	X	0.000266	0.000311	2e-05	8.4e-05
		F	X	0.000232	0.000298	2.2e-05	6.4e-05
		G	X	0.000206	0.000263	2.2e-05	9.3e-05
		S	X	0.000184	0.000247	2.5e-05	6.3e-05
		G	X	0.000162	0.000226	2.8e-05	7.3e-05
		F	X	0.000153	0.000218	3.3e-05	4.7e-05
		G	X	0.000148	0.000218	4e-05	3.6e-05
WP_084871275.1	carbohydrate-binding domain protein	M	S	0.922258	0.026111	0.004263	1.2e-05
		T	S	0.922386	0.026071	0.004222	2.8e-05
		Y	S	0.922508	0.026037	0.004187	1.9e-05
		K	S	0.922628	0.026013	0.004158	7e-06
		D	S	0.922727	0.025992	0.004131	4e-06
		T	S	0.922819	0.025974	0.004105	4e-06
		K	S	0.922909	0.025957	0.004079	4e-06
		Q	S	0.922997	0.025942	0.004055	3e-06
		T	S	0.923084	0.025928	0.004031	4e-06
		Q	S	0.923172	0.025915	0.004008	3e-06
		E	S	0.923259	0.025903	0.003984	6e-06
		R	S	0.923347	0.025892	0.00396	7e-06
		Y	S	0.923437	0.02588	0.003936	9e-06
		A	S	0.923527	0.025869	0.003911	1.1e-05
		I	S	0.923621	0.02586	0.003881	1.7e-05
		K	S	0.923715	0.025854	0.003856	1.4e-05
		K	S	0.923808	0.025845	0.003809	4.5e-05
		S	S	0.923908	0.025837	0.00377	3.5e-05
		S	S	0.924003	0.025828	0.003722	5e-05
		K	S	0.924105	0.025823	0.003672	5.2e-05
		W	S	0.924202	0.025816	0.003604	7.6e-05
		K	S	0.924309	0.025816	0.003554	5.4e-05
		T	S	0.924413	0.025817	0.003507	5.1e-05
		A	S	0.924509	0.025807	0.00344	8.8e-05
		G	S	0.924614	0.02577	0.003349	0.000141
		S	S	0.924741	0.025738	0.003284	0.000111
		V	S	0.924876	0.025732	0.003246	5.1e-05
		L	S	0.924998	0.025736	0.003216	3.4e-05
		V	S	0.925097	0.025725	0.003185	6.4e-05
		A	S	0.925175	0.025713	0.003099	0.000138
		S	S	0.925253	0.025725	0.003025	0.000105
		L	S	0.925322	0.025756	0.002989	4.8e-05
		I	S	0.925382	0.025793	0.002956	3.4e-05
		F	S	0.92541	0.025832	0.002915	5.3e-05
		G	S	0.92525	0.025866	0.0018	0.001305
		S	S	0.925161	0.025906	0.000552	0.001355
		S	S	0.924928	0.025942	0.000223	0.000572
		V	S	0.924754	0.025972	0.000178	0.000217
		V	S	0.924462	0.025994	0.000151	0.00031
		L	S	0.923583	0.026003	0.000111	0.000913
		N	S	0.921768	0.025973	8.6e-05	0.001875
		E	S	0.921312	0.025994	7.6e-05	0.000459
		N	S	0.920641	0.026007	5.9e-05	0.000686
		K	S	0.919477	0.026023	5.3e-05	0.001162
		A	S	0.909189	0.025526	2.9e-05	0.010809
		S	S	0.903936	0.025502	2.5e-05	0.005292
		A	C	0.025843	0.00312	1e-05	0.900658
		D	X	0.023983	0.003055	2.5e-05	0.001991
		E	X	0.020162	0.002725	2.8e-05	0.004169
		A	X	0.015793	0.002258	2.4e-05	0.004878
		N	X	0.013716	0.002108	2.8e-05	0.002242
		T	X	0.01091	0.00182	2.8e-05	0.003131
		E	X	0.009448	0.00165	3.2e-05	0.001649
		S	X	0.007743	0.001437	3.3e-05	0.00195
		T	X	0.006652	0.001246	3.6e-05	0.001302
		L	X	0.005579	0.001074	3.9e-05	0.001271
		S	X	0.004511	0.000914	3.7e-05	0.001262
		T	X	0.003767	0.000772	3.8e-05	0.00091
		V	X	0.003277	0.000685	4e-05	0.000594
		T	X	0.002904	0.000629	4.3e-05	0.000448
		T	X	0.002504	0.000563	4.3e-05	0.000494
		G	X	0.002163	0.000495	4.1e-05	0.000443
		E	X	0.001899	0.000434	4e-05	0.000353
		T	X	0.001726	0.000389	4.3e-05	0.000243
		T	X	0.001494	0.00034	4.2e-05	0.000321
		A	X	0.001225	0.000283	3.5e-05	0.000382
		D	X	0.001095	0.000265	3.7e-05	0.000175
		L	X	0.000954	0.000231	3.9e-05	0.000208
		I	X	0.000836	0.000201	4.1e-05	0.000183
		E	X	0.000748	0.000197	5e-05	0.000125
O00468	Agrin	M	L	0.11568	0.002802	0.877292	4e-06
		A	L	0.115663	0.002774	0.877341	3.1e-05
		G	L	0.115646	0.002742	0.877392	3.6e-05
		R	L	0.115632	0.002717	0.877463	2.1e-05
		S	L	0.115619	0.002693	0.877531	1.6e-05
		H	L	0.115608	0.002673	0.877595	7e-06
		P	L	0.115596	0.002657	0.877653	3e-06
		G	L	0.115584	0.002641	0.877703	3e-06
		P	L	0.11557	0.002624	0.877749	5e-06
		L	L	0.115556	0.002608	0.877796	6e-06
		R	L	0.115538	0.002588	0.877823	2.9e-05
		P	L	0.115521	0.002571	0.877872	1.4e-05
		L	L	0.1155	0.002551	0.877897	3.8e-05
		L	L	0.115481	0.002534	0.877942	1.9e-05
		P	L	0.115459	0.002517	0.877981	2.4e-05
		L	L	0.11544	0.002503	0.878016	2.3e-05
		L	L	0.115419	0.002493	0.878024	4.4e-05
		V	L	0.115392	0.002484	0.877953	0.000121
		V	L	0.115344	0.002475	0.877832	0.000185
		A	L	0.115184	0.002445	0.87696	0.001057
		A	C	0.114923	0.002387	0.046485	0.83082
		C	X	0.114756	0.002381	0.045339	0.001566
		V	X	0.114568	0.002288	0.044773	0.000895
		L	X	0.11446	0.002291	0.044522	0.000414
		P	X	0.113885	0.002289	0.043494	0.001661
		G	X	0.112973	0.002229	0.016473	0.028039
		A	X	0.111654	0.002188	0.014428	0.003408
		G	X	0.102914	0.002041	0.012903	0.010397
		G	X	0.068438	0.001571	0.009753	0.038082
		T	X	0.063479	0.001473	0.000772	0.01404
		C	X	0.059349	0.001421	0.000705	0.004222
		P	X	0.055823	0.001394	0.000635	0.003606
		E	X	0.053063	0.001366	0.00055	0.002865
		R	X	0.048565	0.001308	0.00042	0.004686
		A	X	0.032318	0.000803	0.000203	0.016984
		L	X	0.029107	0.00073	0.000185	0.003305
		E	X	0.02554	0.000656	0.000176	0.003658
		R	X	0.020563	0.000511	0.000155	0.005158
		R	X	0.015503	0.000372	9.2e-05	0.00528
		E	X	0.012218	0.000307	7.6e-05	0.003378
		E	X	0.010346	0.000269	6.1e-05	0.001935
		E	X	0.008104	0.00021	3.3e-05	0.002344
		A	X	0.00554	0.000129	1.4e-05	0.002686
		N	X	0.00452	0.000112	1.3e-05	0.001046
		V	X	0.003802	0.0001	1.5e-05	0.000738
		V	X	0.003325	9.3e-05	1.7e-05	0.000492
		L	X	0.002721	8.1e-05	1.6e-05	0.000631
		T	X	0.00218	7.1e-05	1.4e-05	0.000567
		G	X	0.001836	6.4e-05	1.2e-05	0.000363
		T	X	0.001528	6e-05	1e-05	0.000327
		V	X	0.001303	5.7e-05	1e-05	0.000238
		E	X	0.001099	5.4e-05	1e-05	0.000218
		E	X	0.000877	4.9e-05	9e-06	0.000242
		I	X	0.000769	4.6e-05	1e-05	0.000122
		L	X	0.000669	4.3e-05	1.1e-05	0.000116
		N	X	0.000553	3.9e-05	9e-06	0.000135
		V	X	0.000476	3.6e-05	8e-06	9.3e-05
		D	X	0.000434	3.6e-05	1e-05	5.1e-05
		P	X	0.00037	3.3e-05	1.1e-05	8.1e-05
		V	X	0.000319	3.1e-05	1.1e-05	6.8e-05
		Q	X	0.000279	2.9e-05	1.1e-05	5.4e-05
		H	X	0.000239	2.6e-05	1.1e-05	6e-05
		T	X	0.000199	2.2e-05	1e-05	5.9e-05
		Y	X	0.000175	2e-05	1.1e-05	3.7e-05
		S	X	0.000137	1.7e-05	8e-06	6.1e-05
		C	X	0.000118	1.7e-05	7e-06	3.2e-05
		K	X	0.000101	1.7e-05	7e-06	2.8e-05
		V	X	8.8e-05	1.8e-05	9e-06	2.4e-05
		R	X	7.2e-05	1.8e-05	7e-06	3.4e-05
		V	X	6.8e-05	2.2e-05	1.2e-05	1.1e-05
D3KYQ3	Macronuclear nucleoporin protein	M	X	0.459507	0.012971	0.009826	0.001276
		F	X	0.456313	0.012909	0.009725	0.003257
		G	X	0.453732	0.012853	0.009641	0.002635
		N	X	0.451019	0.012808	0.009563	0.002754
		T	X	0.449247	0.012769	0.009492	0.0018
		G	X	0.445458	0.01273	0.009412	0.00382
		G	X	0.437874	0.01269	0.009316	0.007632
		G	X	0.430721	0.012647	0.009177	0.007248
		G	X	0.418598	0.012578	0.008956	0.012325
		L	X	0.409076	0.012517	0.008795	0.009676
		F	X	0.397865	0.012459	0.008449	0.011546
		G	X	0.377089	0.012391	0.007743	0.021476
		N	X	0.360747	0.012327	0.006855	0.017224
		T	X	0.344524	0.012275	0.005952	0.017104
		Q	X	0.333266	0.012232	0.005114	0.012076
		T	X	0.314102	0.012159	0.003756	0.020527
		Q	X	0.302508	0.01211	0.003346	0.011987
		Q	X	0.288382	0.011988	0.002903	0.01463
		T	X	0.27569	0.011931	0.002665	0.012916
		G	X	0.255908	0.011849	0.001927	0.020526
		G	X	0.22071	0.011711	0.001469	0.035706
		G	X	0.196468	0.011648	0.001227	0.024466
		L	X	0.180004	0.011596	0.001068	0.016616
		F	X	0.163786	0.011539	0.000886	0.016416
		G	X	0.118523	0.011424	0.000552	0.045681
		Q	X	0.108679	0.011394	0.000498	0.009907
		P	X	0.095667	0.011352	0.00042	0.01313
		Q	X	0.08907	0.011317	0.000354	0.006707
		Q	X	0.082407	0.011286	0.000309	0.00675
		T	X	0.076611	0.011245	0.000283	0.005882
		Q	X	0.07154	0.011206	0.000264	0.005151
		F	X	0.06464	0.01114	0.000231	0.007023
		G	X	0.05334	0.011063	0.000188	0.011449
		Q	X	0.04581	0.011008	0.000162	0.007634
		T	X	0.037858	0.010952	0.000148	0.008042
		G	X	0.02861	0.010891	0.000118	0.009361
		A	X	0.015992	0.010778	9e-05	0.012775
		T	X	0.012053	0.010717	8e-05	0.004013
		G	X	0.007705	0.010646	6.5e-05	0.004437
		G	X	0.005994	0.010601	5.9e-05	0.001763
		G	X	0.005314	0.010565	5.8e-05	0.000717
		L	X	0.004814	0.01052	5.7e-05	0.000548
		F	X	0.00434	0.010468	5.6e-05	0.00053
		G	X	0.003587	0.010367	4.9e-05	0.000864
		G	X	0.002945	0.010259	3.4e-05	0.000771
		A	X	0.002447	0.009995	2.6e-05	0.000769
		T	X	0.002192	0.009837	2.4e-05	0.000413
		N	X	0.002038	0.009669	2.4e-05	0.000322
		T	X	0.001809	0.009423	2.4e-05	0.000478
		F	X	0.001682	0.009274	2.5e-05	0.000278
		G	X	0.001414	0.008792	2.3e-05	0.000758
		G	X	0.001255	0.008502	2.2e-05	0.000456
		G	X	0.001147	0.008308	2.2e-05	0.000306
		G	X	0.001053	0.00814	2.3e-05	0.000266
		G	X	0.000968	0.007984	2.4e-05	0.000246
		G	X	0.000896	0.007863	2.7e-05	0.000199
		G	X	0.000823	0.007712	2.9e-05	0.000232
		L	X	0.000761	0.007519	3.2e-05	0.000266
		F	X	0.000696	0.00727	3.5e-05	0.000326
		G	X	0.000607	0.006676	3.2e-05	0.00071
		G	X	0.000536	0.005637	2.3e-05	0.001142
		N	X	0.000482	0.00532	2.5e-05	0.000386
		N	X	0.000432	0.005058	2.8e-05	0.000326
		N	X	0.00037	0.00453	2.8e-05	0.000613
		Q	X	0.00031	0.003908	2.7e-05	0.000709
		Q	X	0.000261	0.003261	2.5e-05	0.000723
		T	X	0.000229	0.002648	2.5e-05	0.000668
		N	X	0.000212	0.002474	2.8e-05	0.000208
		P	X	0.000186	0.002068	3.3e-05	0.000459
		T	X	0.000176	0.001949	4.1e-05	0.000156
L7V457	PE-PGRS family protein	M	X	0.167987	0.13828	0.013083	1.7e-05
		S	X	0.167965	0.138271	0.01301	4.4e-05
		Y	X	0.167947	0.138278	0.01295	3.8e-05
		V	X	0.167929	0.138291	0.0129	2.7e-05
		L	X	0.167911	0.138306	0.012852	2.3e-05
		T	X	0.167887	0.13832	0.012804	3e-05
		I	X	0.16787	0.138344	0.012764	1.7e-05
		P	X	0.16785	0.138366	0.012726	2e-05
		D	X	0.167818	0.13839	0.012686	3.5e-05
		A	X	0.167747	0.138414	0.012635	8.5e-05
		L	X	0.167655	0.138444	0.012583	0.000111
		T	X	0.167384	0.138471	0.012506	0.000314
		S	X	0.166509	0.138492	0.011918	0.00144
		A	X	0.162911	0.138417	0.011121	0.004448
		A	X	0.159615	0.138357	0.009953	0.004536
		R	X	0.157283	0.138393	0.009303	0.003021
		D	X	0.155857	0.138401	0.008981	0.001771
		V	X	0.154213	0.138422	0.008467	0.002188
		R	X	0.151794	0.138432	0.007872	0.003051
		G	X	0.148981	0.138329	0.007006	0.003826
		I	X	0.14719	0.138313	0.006748	0.002132
		G	X	0.144586	0.138225	0.006388	0.003099
		A	X	0.141285	0.138027	0.00595	0.003983
		A	X	0.138668	0.137781	0.005228	0.003637
		L	X	0.137242	0.137677	0.005012	0.001823
		D	X	0.136081	0.137604	0.004801	0.001506
		A	X	0.134218	0.137291	0.004318	0.002723
		V	X	0.133565	0.137273	0.004232	0.000843
		N	X	0.132982	0.137201	0.004145	0.000815
		L	X	0.132255	0.137076	0.004013	0.001059
		T	X	0.131488	0.137021	0.003908	0.000997
		A	X	0.129956	0.13667	0.003567	0.002287
		A	X	0.127767	0.135783	0.003311	0.003396
		V	X	0.127346	0.135684	0.00328	0.000621
		P	X	0.126693	0.135566	0.003197	0.000912
		T	X	0.12567	0.135277	0.003085	0.001482
		A	X	0.124847	0.135083	0.002952	0.001205
		G	X	0.123819	0.134824	0.002807	0.001481
		V	X	0.123025	0.134314	0.002747	0.001405
		L	X	0.122104	0.134144	0.002693	0.001181
		A	X	0.068733	0.121972	0.002387	0.065893
		A	X	0.065719	0.118898	0.001493	0.007109
		G	X	0.059381	0.114931	0.001125	0.01071
		A	X	0.040002	0.085136	0.000761	0.049656
		D	X	0.039524	0.084617	0.000766	0.001092
		E	X	0.03875	0.082999	0.000755	0.002446
		V	X	0.037982	0.080785	0.000728	0.003068
		S	X	0.036733	0.07919	0.000684	0.002965
		A	X	0.029244	0.059823	0.000522	0.027163
		A	X	0.026567	0.049944	0.000418	0.012838
		V	X	0.025307	0.046718	0.00039	0.004615
		A	X	0.020079	0.034748	0.000238	0.017499
		A	X	0.017938	0.029567	0.000182	0.007499
		V	X	0.017218	0.028157	0.000178	0.002192
		F	X	0.016573	0.027186	0.000173	0.001686
		S	X	0.015043	0.023988	0.000134	0.004874
		A	X	0.01403	0.021498	9.5e-05	0.003648
		H	X	0.013404	0.020773	8.5e-05	0.001455
		A	X	0.003647	0.007138	3.2e-05	0.023814
		Q	X	0.003158	0.006585	3e-05	0.001081
		D	X	0.002922	0.006282	3.2e-05	0.000567
		Y	X	0.002678	0.005915	3.5e-05	0.000645
		Q	X	0.002384	0.005376	3.8e-05	0.00088
		A	X	0.00209	0.00467	4.2e-05	0.00106
		L	X	0.001911	0.004311	5e-05	0.000588
		S	X	0.001406	0.003366	4.7e-05	0.001566
		A	X	0.001183	0.002472	4.6e-05	0.001223
		E	X	0.001024	0.001842	5.1e-05	0.00087
		A	X	0.000777	0.00095	4e-05	0.001279
		T	X	0.000733	0.000862	4.8e-05	0.000167
A7SCE9	Predicted protein (Fragment)	C	X	0.269114	0.066704	0.243218	0.000248
		T	X	0.268439	0.066662	0.24317	0.000736
		R	X	0.267802	0.066626	0.243115	0.000683
		G	X	0.267193	0.0666	0.243063	0.000649
		S	X	0.266597	0.066572	0.242893	0.000755
		C	X	0.266346	0.06656	0.242806	0.000334
		N	X	0.26614	0.066546	0.242741	0.000264
		R	X	0.265555	0.066534	0.242683	0.000637
		G	X	0.264155	0.066522	0.242517	0.00155
		S	X	0.262413	0.06647	0.24146	0.002816
		C	X	0.26161	0.066436	0.241052	0.00123
		T	X	0.259747	0.066387	0.240719	0.002205
		R	X	0.257758	0.06631	0.239881	0.002854
		G	X	0.249146	0.065222	0.237291	0.012149
		S	X	0.239278	0.062694	0.224921	0.024552
		C	X	0.234695	0.058044	0.222214	0.011871
		T	X	0.22727	0.055551	0.220731	0.011114
		R	X	0.220252	0.054706	0.217753	0.01048
		G	X	0.200699	0.052978	0.20664	0.03147
		S	X	0.181702	0.047869	0.176589	0.052687
		C	X	0.173171	0.042907	0.172412	0.016813
		T	X	0.165571	0.040261	0.170066	0.011479
		R	X	0.15533	0.038595	0.166518	0.014402
		G	X	0.139605	0.036661	0.155626	0.026705
		S	X	0.120738	0.031804	0.130402	0.046741
		C	X	0.112232	0.027115	0.126566	0.015881
		T	X	0.107118	0.024736	0.123831	0.00918
		R	X	0.099542	0.023374	0.12114	0.010696
		G	X	0.089771	0.020667	0.106785	0.025613
		S	X	0.078286	0.017548	0.081572	0.038727
		C	X	0.072176	0.013743	0.074024	0.016935
		T	X	0.06896	0.012217	0.069535	0.008739
		R	X	0.064403	0.011494	0.066704	0.007701
		G	X	0.059051	0.009772	0.054984	0.018333
		S	X	0.054123	0.008231	0.033756	0.027368
		C	X	0.051069	0.006412	0.029928	0.008543
		T	X	0.049356	0.005838	0.027539	0.004507
		R	X	0.046914	0.005505	0.025694	0.004492
		G	X	0.044482	0.004566	0.02086	0.008086
		S	X	0.042523	0.003881	0.011365	0.01209
		C	X	0.041226	0.003006	0.010023	0.003498
		T	X	0.04044	0.002771	0.009184	0.001825
		R	X	0.039271	0.002626	0.008473	0.002004
		G	X	0.038289	0.002197	0.007171	0.002708
		S	X	0.037338	0.001909	0.004487	0.003944
		C	X	0.036702	0.001528	0.003984	0.001541
		T	X	0.03631	0.001436	0.003701	0.000771
		R	X	0.035765	0.001365	0.003423	0.000904
		G	X	0.035303	0.001202	0.003083	0.000986
		S	X	0.034709	0.001084	0.002307	0.001528
		C	X	0.034334	0.000943	0.002092	0.000761
		T	X	0.034114	0.000913	0.001985	0.000374
		R	X	0.033807	0.00089	0.001887	0.000451
		G	X	0.033512	0.000834	0.001773	0.000493
		S	X	0.033001	0.000785	0.00144	0.000943
		C	X	0.03274	0.000735	0.001333	0.000453
		T	X	0.032592	0.000729	0.001285	0.000225
		R	X	0.032338	0.000724	0.001245	0.00033
		G	X	0.032072	0.000709	0.001195	0.000365
		S	X	0.031402	0.000689	0.000985	0.000952
		C	X	0.031167	0.000674	0.000925	0.000348
		T	X	0.031019	0.000677	0.0009	0.000199
		R	X	0.030685	0.000679	0.000881	0.000387
		G	X	0.030311	0.000676	0.000851	0.00044
		S	X	0.028951	0.000663	0.000686	0.001588
		C	X	0.028615	0.000657	0.000649	0.00042
		T	X	0.028294	0.000659	0.000622	0.000373
		R	X	0.027629	0.000655	0.000602	0.000741
		G	X	0.026671	0.000652	0.00055	0.001052
		S	X	0.026027	0.000662	0.000532	0.000697
P37198	Nuclear pore glycoprotein	M	X	0.250718	0.114048	0.060177	0.000234
		S	X	0.250199	0.113975	0.060035	0.000645
		G	X	0.249745	0.113918	0.05984	0.000641
		F	X	0.249401	0.113857	0.059631	0.000559
		N	X	0.249257	0.113825	0.059502	0.000253
		F	X	0.249045	0.113788	0.059331	0.000368
		G	X	0.248619	0.11369	0.058808	0.000997
		G	X	0.247741	0.11357	0.057951	0.001809
		T	X	0.246386	0.113422	0.056955	0.002456
		G	X	0.243186	0.113183	0.05483	0.005521
		A	X	0.241672	0.112933	0.053698	0.002866
		P	X	0.240442	0.112832	0.053108	0.001895
		T	X	0.238603	0.112772	0.052391	0.002584
		G	X	0.235105	0.112594	0.050209	0.005809
		G	X	0.227097	0.112031	0.047366	0.011356
		F	X	0.219094	0.111383	0.044647	0.011324
		T	X	0.209296	0.110291	0.04115	0.014345
		F	X	0.204352	0.109962	0.039275	0.007113
		G	X	0.193838	0.108702	0.033367	0.017632
		T	X	0.186318	0.108039	0.030249	0.011265
		A	X	0.173309	0.105784	0.019514	0.025974
		K	X	0.166863	0.105078	0.016917	0.009707
		T	X	0.146509	0.100678	0.013089	0.028558
		A	X	0.134303	0.096377	0.008506	0.021077
		T	X	0.127559	0.093986	0.007417	0.01015
		T	X	0.120817	0.091444	0.006802	0.009822
		T	X	0.11818	0.090843	0.006545	0.00342
		P	X	0.111046	0.089048	0.005756	0.009647
		A	X	0.096161	0.080682	0.004125	0.02482
		T	X	0.092047	0.079851	0.003928	0.005066
		G	X	0.071587	0.070191	0.002913	0.031082
		F	X	0.067218	0.068882	0.002671	0.005862
		S	X	0.05702	0.062555	0.002186	0.016959
		F	X	0.052945	0.061017	0.001957	0.005787
		S	X	0.04293	0.055038	0.001383	0.016531
		T	X	0.038283	0.052169	0.001002	0.007852
		S	X	0.03341	0.049482	0.000747	0.00777
		G	X	0.028253	0.045533	0.000284	0.009546
		T	X	0.025806	0.044275	0.000205	0.003731
		G	X	0.023986	0.043495	0.000164	0.002601
		G	X	0.020806	0.041852	0.000129	0.004842
		F	X	0.019763	0.041375	0.000122	0.001515
		N	X	0.018732	0.040878	0.000114	0.001539
		F	X	0.017721	0.040378	0.000107	0.001536
		G	X	0.015647	0.037553	7.6e-05	0.004973
		A	X	0.014755	0.036389	7.3e-05	0.002093
		P	X	0.013926	0.035651	7.4e-05	0.001601
		F	X	0.012948	0.034067	7e-05	0.002617
		Q	X	0.01248	0.033551	7.6e-05	0.001017
		P	X	0.011152	0.032076	7.3e-05	0.002873
		A	X	0.009347	0.027176	5.3e-05	0.006837
		T	X	0.008555	0.0258	5.4e-05	0.002217
		S	X	0.007203	0.020644	5e-05	0.006595
		T	X	0.006564	0.018242	5.5e-05	0.003083
		P	X	0.005743	0.015774	5.7e-05	0.00334
		S	X	0.004912	0.014055	5.7e-05	0.002608
		T	X	0.004508	0.013365	6.3e-05	0.001131
		G	X	0.003926	0.011362	6.5e-05	0.002638
		L	X	0.00355	0.010561	7e-05	0.001225
		F	X	0.003218	0.009916	7.5e-05	0.001025
		S	X	0.002825	0.008198	7.6e-05	0.002179
		L	X	0.002476	0.007671	7.5e-05	0.00094
		A	X	0.001921	0.005091	5.8e-05	0.003256
		T	X	0.00165	0.004517	5.1e-05	0.000901
		Q	X	0.001485	0.004065	5e-05	0.000654
		T	X	0.001388	0.003809	5e-05	0.000385
		P	X	0.001244	0.003481	5.1e-05	0.000518
		A	X	0.000947	0.002556	4.8e-05	0.001312
		T	X	0.00078	0.002311	5.2e-05	0.000459
		Q	X	0.000697	0.00205	6.2e-05	0.000387
E1ZJE6	Putative uncharacterized protein	M	S	0.93185	0.027068	0.039648	4e-06
		A	S	0.93194	0.027032	0.039583	4.5e-05
		R	S	0.932052	0.027004	0.039526	3.2e-05
		P	S	0.93217	0.026987	0.039481	1.5e-05
		A	S	0.932268	0.02697	0.03944	1e-05
		V	S	0.932363	0.026956	0.039402	2e-06
		P	S	0.932441	0.026942	0.039362	4e-06
		G	S	0.932518	0.026929	0.039321	6e-06
		H	S	0.932597	0.026917	0.039279	7e-06
		R	S	0.932675	0.026905	0.039235	9e-06
		A	S	0.932752	0.026892	0.039178	2.7e-05
		K	S	0.932834	0.026881	0.039118	2.9e-05
		L	S	0.932913	0.026872	0.039062	2.5e-05
		L	S	0.932989	0.026864	0.038998	3.3e-05
		V	S	0.93306	0.026852	0.038863	0.000111
		C	S	0.933144	0.026847	0.038763	7.1e-05
		V	S	0.933212	0.026844	0.038659	7.8e-05
		A	S	0.933241	0.026804	0.03055	0.008062
		C	S	0.933504	0.026868	0.030291	0.000242
		T	S	0.933595	0.026877	0.029948	0.000321
		V	S	0.933678	0.026894	0.029791	0.000131
		L	S	0.93374	0.026912	0.029596	0.00017
		V	S	0.933776	0.02693	0.029298	0.000283
		W	S	0.93378	0.026951	0.028941	0.000357
		A	S	0.932644	0.026898	0.02422	0.005916
		S	S	0.932439	0.026939	0.015587	0.008849
		S	S	0.931919	0.026952	0.014348	0.001765
		G	S	0.931026	0.026964	0.001051	0.014195
		L	S	0.930573	0.026985	0.000808	0.000695
		T	S	0.929428	0.026984	0.000735	0.001223
		T	S	0.929205	0.026999	0.000686	0.000266
		P	S	0.928643	0.027009	0.000569	0.000673
		T	S	0.928151	0.027019	0.000506	0.000545
		S	S	0.926447	0.027025	0.000481	0.00171
		A	S	0.870426	0.026447	0.000249	0.056806
		Q	S	0.863116	0.026444	0.000233	0.007354
		A	C	0.125999	0.004862	0.000117	0.758867
		S	X	0.120451	0.004684	0.000146	0.005951
		E	X	0.115592	0.004509	0.000152	0.005084
		T	X	0.110427	0.004297	0.000157	0.005434
		E	X	0.105488	0.00418	0.000159	0.005136
		A	X	0.094669	0.003696	0.000133	0.011461
		Q	X	0.08862	0.003541	0.000127	0.0063
		A	X	0.070427	0.00259	8.4e-05	0.019356
		S	X	0.065075	0.002459	7.2e-05	0.005555
		A	X	0.051438	0.001845	3.5e-05	0.014394
		T	X	0.049196	0.001753	3.8e-05	0.002348
		P	X	0.04617	0.001649	3.6e-05	0.003167
		T	X	0.043799	0.001553	3.6e-05	0.002505
		N	X	0.042673	0.001528	4.5e-05	0.001179
		P	X	0.040646	0.001474	5.8e-05	0.002128
		Q	X	0.038061	0.001389	6.5e-05	0.002739
		A	X	0.035372	0.001283	6.3e-05	0.00288
		Q	X	0.033	0.001249	7.1e-05	0.002474
		A	X	0.02392	0.001012	5.9e-05	0.009468
		S	X	0.021788	0.000931	6.1e-05	0.002262
		K	X	0.019479	0.000849	6.2e-05	0.002445
		T	X	0.017713	0.000781	6.9e-05	0.001876
		E	X	0.01577	0.00072	7.5e-05	0.00206
		A	X	0.013002	0.00062	6e-05	0.002972
		Q	X	0.010904	0.00056	5.5e-05	0.002219
		A	X	0.003702	0.000386	3.1e-05	0.007499
		S	X	0.002697	0.000329	2.5e-05	0.001085
		T	X	0.002028	0.000282	2.3e-05	0.000731
		T	X	0.001703	0.000243	2.2e-05	0.000375
		P	X	0.00139	0.000216	2.2e-05	0.000352
		T	X	0.001132	0.000187	2.1e-05	0.000303
		T	X	0.000982	0.000162	2.1e-05	0.000189
		P	X	0.000784	0.000137	2.1e-05	0.000242
		Q	X	0.00069	0.000137	3.3e-05	0.000112
WP_010044366.1	hypothetical protein	M	X	0.085874	0.070873	0.006232	2.9e-05
		L	X	0.08585	0.070829	0.006151	3.5e-05
		P	X	0.085826	0.070796	0.00608	3.1e-05
		S	X	0.085807	0.070771	0.006022	1.4e-05
		W	X	0.085785	0.070742	0.005966	1.4e-05
		L	X	0.08576	0.070713	0.005908	2.3e-05
		R	X	0.08573	0.070687	0.005849	3.4e-05
		Q	X	0.085676	0.070661	0.005779	7.3e-05
		L	X	0.085625	0.070642	0.005721	6.3e-05
		F	X	0.08558	0.070625	0.005672	4.9e-05
		R	X	0.085537	0.070611	0.005623	5.3e-05
		N	X	0.085483	0.070603	0.005574	6.6e-05
		K	X	0.085401	0.070597	0.005529	9.4e-05
		F	X	0.085324	0.070594	0.005485	8.8e-05
		T	X	0.085164	0.070589	0.005422	0.000192
		G	X	0.084751	0.070576	0.005299	0.000512
		H	X	0.08427	0.070557	0.005122	0.000645
		G	X	0.083319	0.070438	0.004755	0.001402
		T	X	0.082805	0.070378	0.004515	0.000783
		V	X	0.08223	0.070298	0.004267	0.000869
		A	X	0.081455	0.07018	0.003941	0.001186
		P	X	0.080586	0.070054	0.003557	0.001348
		F	X	0.08004	0.06998	0.003384	0.00077
		Q	X	0.079819	0.069965	0.003305	0.0003
		N	X	0.079007	0.06989	0.003086	0.001089
		A	X	0.07766	0.069601	0.002519	0.002184
		L	X	0.077222	0.069558	0.002413	0.000564
		T	X	0.07457	0.068725	0.002184	0.003686
		L	X	0.073679	0.068555	0.002042	0.001179
		E	X	0.072483	0.068455	0.001903	0.001407
		A	X	0.054264	0.056881	0.001216	0.030456
		L	X	0.053305	0.05644	0.001138	0.001464
		E	X	0.052374	0.055881	0.00105	0.001554
		N	X	0.051314	0.054605	0.00096	0.002408
		R	X	0.049214	0.053077	0.000815	0.003754
		A	X	0.039897	0.031935	0.00053	0.030732
		M	X	0.038729	0.030915	0.000477	0.002227
[truncated: 803 more rows]

## Sheet: Table S4
Table S4: Interpreation of Carbohydrate Active Enzymes
Carbohydrate Active Enzyme	Protein Name	Family	Reference Accession No.
Glycoside Hydrolase Family
Glycoside Hydrolase Family 1	EPT60_04355	GH1	QAB20076.1
	EPT60_04360	GH1	QAB20077.1
	EPT60_02975	GH1	QAB19824.1
	EPT60_01495	GH1	QAB19559.1
	EPT60_01500	GH1	QAB19560.1
	EPT60_01515	GH1	QAB19563.1
	EPT60_02975	GH1	QAB19824.1
Glycoside Hydrolase Family 2	EPT60_00100	GH2	QAB19339.1
Glycoside Hydrolase Family 13	EPT60_02645	GH13	QAB19765.1
	EPT60_04445	GH13	QAB20094.1
	EPT60_14405 (TreC)	GH13	QAB21902.1
	EPT60_14685	GH13	QAB21955.1
	EPT60_14760	GH13	QAB21969.1
	EPT60_14795	GH13	QAB21975.1
	EPT60_14700	GH13	QAB21958.1
	EPT60_15425 (GlgB)	GH13	QAB22093.1
Glycoside Hydrolase Family 23	EPT60_15400	GH13	QAB22088.1
	EPT60_03340	GH23	QAB19892.1
	EPT60_03345	GH23	QAB19893.1
	EPT60_14225	GH23	QAB21866.1
Glycoside Hydrolase Family 25	EPT60_03075	GH25	QAB19841.1
	EPT60_04205	GH25	QAB20051.1
	EPT60_05820	GH25	QAB20347.1
	EPT60_05865	GH25	QAB20355.1
	EPT60_08700	GH25	QAB20869.1
	EPT60_10985	GH25	QAB21278.1
Glycoside Hydrolase Family 31	EPT60_01465	GH31	QAB19553.1
Glycoside Hydrolase Family 32	EPT60_14710	GH32	QAB21960.1
Glycoside Hydrolase Family 36	EPT60_01615	GH36	QAB19582.1
Glycoside Hydrolase Family 38	EPT60_02595	GH38	QAB19755.1
Glycoside Hydrolase Family 65	EPT60_14750	GH65	QAB21967.1
	EPT60_15385	GH65	QAB22085.1
Glycoside Hydrolase Family 73	EPT60_04880	GH73	QAB20180.1
Glycoside Hydrolase Family 78	EPT60_11070	GH73	QAB21295.1
	EPT60_01670	GH78	QAB19592.1
	EPT60_01680	GH78	QAB19594.1
Glycoside Hydrolase Family 85	EPT60_14745	GH85	QAB21966.1
Glycoside Hydrolase Family 170	EPT60_01520	GH170	QAB19564.1
Glycosyl Transferase Family
Glycosyl Transferase Family 2	EPT60_04335	GT2	QAB20072.1
	EPT60_04625	GT2	QAB20130.1
	EPT60_07310	GT2	QAB20599.1
	EPT60_07430	GT2	QAB20622.1
	EPT60_08450	GT2	QAB20820.1
	EPT60_08720	GT2	QAB20873.1
	EPT60_10045	GT2	QAB21126.1
	EPT60_15855 (fragment)	GT2	QAB22228.1
Glycosyl Transferase Family 4	EPT60_04070	GT4	QAB20025.1
	EPT60_04075	GT4	QAB20026.1
	EPT60_04855	GT4	QAB20175.1
	EPT60_07300	GT4	QAB20597.1
	EPT60_10510	GT4	QAB21205.1
	EPT60_10515	GT4	QAB21206.1
	EPT60_10545	GT4	QAB21211.1
	EPT60_10710	GT4	QAB21227.1
	EPT60_10715	GT4	QAB21228.1
	EPT60_14375	GT4	QAB21896.1
	EPT60_15900	GT4	QAB22235.1
Glycosyl Transferase Family 5	EPT60_15410 (GlgA)	GT5	QAB22090.1
Glycosyl Transferase Family 8	EPT60_15895 (fragment)	GT8	QAB22234.1
Glycosyl Transferase Family 14	EPT60_15865 (fragment)	GT14	QAB22230.1
	EPT60_15870 (fragment)	GT14	QAB22231.1
	EPT60_15515 (fragment)	GT14	QAB22169.1
Glycosyl Transferase Family 26	EPT60_13245	GT26	QAB21690.1
Glycosyl Transferase Family 28	EPT60_06895 (MurG)	GT28	QAB20525.1
Glycosyl Transferase Family 35	EPT60_15405 (GlgP)	GT35	QAB22089.1
Glycosyl Transferase Family 51	EPT60_08770	GT51	QAB20882.1
	EPT60_10110	GT51	QAB21139.1
Carbohydrate Esterase Family
Carbohydrate Esterase Family 9	EPT60_13255 (NagA)	CE9	QAB21692.1
Auxiliary Activity Family
Auxiliary Activity Family 10	EPT60_09000	AA10	QAB20927.1
Carbohydrate Binding Module Family
Carbohydrate Binding Module Family 32	EPT60_14745	CBM32	QAB21966.1
Carbohydrate Binding Module Family 34	EPT60_04445	CBM34	QAB20094.1
Carbohydrate Binding Module Family 48	EPT60_15425 (GlgB)	CBM48	QAB22093.1
Carbohydrate Binding Module Family 50	EPT60_01875	CBM50	QAB22116.1
	EPT60_03340	CBM50	QAB19892.1
	EPT60_03345	CBM50	QAB19893.1
	EPT60_04060	CBM50	QAB20023.1
	EPT60_04065	CBM50	QAB20024.1
	EPT60_05865	CBM50	QAB20355.1
	EPT60_07025	CBM50	QAB20550.1
	EPT60_08225	CBM50	QAB20775.1
	EPT60_14220	CBM50	QAB21865.1
	EPT60_14225	CBM50	QAB21866.1

## Sheet: Table S5
Table S5: Annotation of Carbohydrate Active Enzymes previously predicted by CAZy
Gene ID	EC#	HMMER	eCAMI	DIAMOND	Signalp	#ofTools
NZ_CP035032.1_3	N	GT14(10-187)	GT14	GT8	N	3
NZ_CP035032.1_72	N	GT2(8-147)	GT2	N	N	2
NZ_CP035032.1_76	N	GT14(7-118)	N	N	N	2
NZ_CP035032.1_80	N	GT8(6-270)	GT8	N	N	2
NZ_CP035032.1_81	N	GT4(223-378)	GT4	N	N	2
NZ_CP035032.1_84	N	GT14(10-187)	GT14	N	N	1
NZ_CP035032.1_5	N	N	GH36	N	N	1
NZ_CP035032.1_8	N	N	GH36	N	N	1
NZ_CP035032.1_61	N	N	GH36	N	N	1
NZ_CP035032.1_69	N	N	GH36	N	N	1
NZ_CP035032.1_79	N	N	GT2	N	N	1
NZ_CP035032.1_86	N	N	GH36	N	N	1
NZ_CP035032.1_89	N	N	GH36	N	N	1
HMMER
Query ID	Query Length	HMM Profile	HMM Length	E-Value	HMM Start	HMM End	Query Start	Query End	Coverage
NZ_CP035032.1_3	218	GT14.hmm	250	1.5e-23	61	240	10	187	0.716
NZ_CP035032.1_72	281	GT2.hmm	170	1.6e-27	1	146	8	147	0.852941
NZ_CP035032.1_76	158	GT14.hmm	250	1.4e-20	5	126	7	118	0.484
NZ_CP035032.1_80	341	GT8.hmm	257	2.4e-49	24	254	6	270	0.894942
NZ_CP035032.1_81	411	GT4.hmm	160	1.3e-27	6	155	223	378	0.93125
NZ_CP035032.1_84	218	GT14.hmm	250	1.5e-23	61	240	10	187	0.716
DIAMOND
Query ID	Subject ID	%Identical	Length	Query Start	Query End	Subject Start	Subject End	E-Value	Bit Score
NZ_CP035032.1_3	QAB22169.1|GT14	100	217	1	217	1	217	4e-119	431
NZ_CP035032.1_5	AGL62902.2|GH36	99	309	1	309	1	309	1.1e-175	619.4
NZ_CP035032.1_61	AGL62902.2|GH36	98.5	197	1	197	113	309	9.8e-109	396.4
NZ_CP035032.1_69	AGL62902.2|GH36	98.5	197	1	197	113	309	9.8e-109	396.4
NZ_CP035032.1_72	QAB24974.1|GT2	100	280	1	280	6	285	4.2e-137	491.1
NZ_CP035032.1_79	QBA78937.1|GT2	97.7	262	19	280	55	316	1.7e-143	512.3
NZ_CP035032.1_8	AGL62902.2|GH36	99.1	222	1	222	88	309	6.5e-125	450.3
NZ_CP035032.1_80	QAB24981.1|GT8	100	340	1	340	1	340	2e-189	665.2
NZ_CP035032.1_81	QAB22235.1|GT4	100	410	1	410	1	410	1.8e-229	798.5
NZ_CP035032.1_84	QAB22169.1|GT14	100	217	1	217	1	217	4e-119	431
NZ_CP035032.1_86	AGL62902.2|GH36	99	309	1	309	1	309	1.1e-175	619.4
NZ_CP035032.1_89	AGL62902.2|GH36	99.1	219	1	219	88	306	1.1e-122	443.4
CGC-Finder
CGC	Gene ID	Genome ID	Gene Type	Downstream Distance	Upstream Distance	Gene Start	Gene Stop	Direction	Database
CGC1	NZ_CP035032.1_6	NZ_CP035032.1	TC	8	2	3743	5134	+	gnl|TC-DB|O34474|2.A.66.1.25
	NZ_CP035032.1_3	NZ_CP035032.1	-	-	-	2158	3087	+
	NZ_CP035032.1_3	NZ_CP035032.1	-	-	-	1462	1917	+
	NZ_CP035032.1_3	NZ_CP035032.1	CAZyme	2	-	753	1406	+	GT14
CGC2	NZ_CP035032.1_87	NZ_CP035032.1	TC	-	2	74550	75941	+	gnl|TC-DB|O34474|2.A.66.1.25
	NZ_CP035032.1_84	NZ_CP035032.1	-	-	-	72965	73894	+
	NZ_CP035032.1_84	NZ_CP035032.1	-	-	-	72267	72722	+
	NZ_CP035032.1_84	NZ_CP035032.1	CAZyme	2	2	71558	72211	+	GT14
	NZ_CP035032.1_81	NZ_CP035032.1	-	-	-	71352	71528	-
	NZ_CP035032.1_81	NZ_CP035032.1	-	-	-	70347	71267	-
	NZ_CP035032.1_81	NZ_CP035032.1	CAZyme	2	0	69061	70293	+	GT4
	NZ_CP035032.1_80	NZ_CP035032.1	CAZyme	0	7	68017	69039	+	GT8

## Sheet: Table S6
Table S6: Collinearity Analysis of Similar Genomes of Lactobacillus plantrum
Contig	Gene	Length	Gene ID	Function	Hit
1	1	456	fig|6666666.904161.peg.1	Chromosomal replication initiator protein DnaA	bi
1	2	45	fig|6666666.904161.peg.2	LSU ribosomal protein L34p	-
1	3	115	fig|6666666.904161.peg.3	Ribonuclease P protein component (EC 3.1.26.5)	bi
1	4	278	fig|6666666.904161.peg.4	Inner membrane protein translocase and chaperone YidC, short form OxaI-like	bi
1	5	40	fig|6666666.904161.peg.5	hypothetical protein	bi
1	6	546	fig|6666666.904161.peg.6	Oligopeptide ABC transporter, substrate-binding protein OppA (TC 3.A.1.5.1)	bi
1	7	418	fig|6666666.904161.peg.7	Imidazolonepropionase related amidohydrolase	bi
1	8	323	fig|6666666.904161.peg.8	RNA-binding protein Jag	bi
1	9	464	fig|6666666.904161.peg.9	tRNA-5-carboxymethylaminomethyl-2-thiouridine(34) synthesis protein MnmE	bi
1	10	637	fig|6666666.904161.peg.10	tRNA-5-carboxymethylaminomethyl-2-thiouridine(34) synthesis protein MnmG	bi
1	11	245	fig|6666666.904161.peg.11	hypothetical protein	bi
1	12	350	fig|6666666.904161.peg.12	cell surface protein precursor	bi
1	13	114	fig|6666666.904161.peg.13	cell surface protein precursor	bi
1	14	513	fig|6666666.904161.peg.14	hypothetical protein	bi
1	15	196	fig|6666666.904161.peg.15	Signal peptidase I (EC 3.4.21.89)	bi
1	16	42	fig|6666666.904161.peg.16	hypothetical protein	bi
1	17	439	fig|6666666.904161.peg.17	Aminopeptidase C (EC 3.4.22.40)	bi
1	18	141	fig|6666666.904161.peg.18	Predicted transcriptional regulators	bi
1	19	289	fig|6666666.904161.peg.19	hypothetical protein	bi
1	20	161	fig|6666666.904161.peg.20	Protein export cytoplasm protein SecA ATPase RNA helicase (TC 3.A.5.1.1)	bi
1	21	267	fig|6666666.904161.peg.21	2-oxo-hept-3-ene-1,7-dioate hydratase	bi
1	22	121	fig|6666666.904161.peg.22	Phenolic acid decarboxylase (EC 4.1.1.-)	bi
1	23	310	fig|6666666.904161.peg.23	Mobile element protein	uni
1	24	76	fig|6666666.904161.peg.24	Phenolic acid decarboxylase (EC 4.1.1.-)	uni
1	25	182	fig|6666666.904161.peg.25	Negative regulator of phenolic acid metabolism PadR	bi
1	26	154	fig|6666666.904161.peg.26	nucleotide-binding protein, UspA family	bi
1	27	868	fig|6666666.904161.peg.27	Acetaldehyde dehydrogenase (EC 1.2.1.10) / Alcohol dehydrogenase (EC 1.1.1.1)	bi
1	28	290	fig|6666666.904161.peg.28	hypothetical protein	-
1	29	160	fig|6666666.904161.peg.29	Mobile element protein	-
1	30	889	fig|6666666.904161.peg.30	hypothetical protein	-
1	31	687	fig|6666666.904161.peg.31	hypothetical protein	-
1	32	72	fig|6666666.904161.peg.32	hypothetical protein	-
1	33	380	fig|6666666.904161.peg.33	Ribose operon repressor	bi
1	34	307	fig|6666666.904161.peg.34	Ribokinase (EC 2.7.1.15)	bi
1	35	132	fig|6666666.904161.peg.35	D-ribose pyranase (EC 5.4.99.62)	bi
1	36	295	fig|6666666.904161.peg.36	Putative ribose uptake protein RbsU, GRP transporter family (TC 2.A.7.5)	bi
1	37	268	fig|6666666.904161.peg.37	Sorbitol-6-phosphate 2-dehydrogenase (EC 1.1.1.140)	uni
1	38	622	fig|6666666.904161.peg.38	hypothetical protein	-
1	39	169	fig|6666666.904161.peg.39	Glucitol operon activator protein	-
1	40	184	fig|6666666.904161.peg.40	PTS system, glucitol/sorbitol-specific IIC component	-
1	41	340	fig|6666666.904161.peg.41	PTS system, glucitol/sorbitol-specific IIB component (EC 2.7.1.198) / PTS system, glucitol/sorbitol-specific IIC component 2	-
1	42	126	fig|6666666.904161.peg.42	PTS system, glucitol/sorbitol-specific IIA component (EC 2.7.1.198)	uni
1	43	604	fig|6666666.904161.peg.43	Pyruvate oxidase (EC 1.2.3.3)	bi
1	44	142	fig|6666666.904161.peg.44	Rrf2 family transcriptional regulator, group III	bi
1	45	583	fig|6666666.904161.peg.45	Pyruvate oxidase (EC 1.2.3.3)	bi
1	46	244	fig|6666666.904161.peg.46	Putative oxidase STM1620	bi
1	47	119	fig|6666666.904161.peg.47	Putative oxidase STM1620	uni
1	48	78	fig|6666666.904161.peg.48	hypothetical protein	bi
1	49	705	fig|6666666.904161.peg.49	ClpE-like protein	bi
1	50	199	fig|6666666.904161.peg.50	hypothetical protein	bi
1	51	421	fig|6666666.904161.peg.51	Histidine kinase of the competence regulon ComD	bi
1	52	248	fig|6666666.904161.peg.52	response regulator	bi
1	53	146	fig|6666666.904161.peg.53	negative regulator of proteolysis	bi
1	54	485	fig|6666666.904161.peg.54	Catalase KatE (EC 1.11.1.6)	bi
1	55	82	fig|6666666.904161.peg.55	hypothetical protein	bi
1	56	45	fig|6666666.904161.peg.56	hypothetical protein	bi
1	57	183	fig|6666666.904161.peg.57	Substrate-specific component FolT of folate ECF transporter	bi
1	58	177	fig|6666666.904161.peg.58	Transposase	uni
1	59	296	fig|6666666.904161.peg.59	Putative transposase InsK for insertion sequence element IS150	uni
1	60	124	fig|6666666.904161.peg.60	hypothetical protein	bi
1	61	310	fig|6666666.904161.peg.61	Mobile element protein	uni
1	62	402	fig|6666666.904161.peg.62	Ferredoxin reductase	bi
1	63	229	fig|6666666.904161.peg.63	N-acetylmannosamine-6-phosphate 2-epimerase (EC 5.1.3.9)	bi
1	64	293	fig|6666666.904161.peg.64	N-acetylneuraminate lyase (EC 4.1.3.3)	bi
1	65	288	fig|6666666.904161.peg.65	N-acetylmannosamine kinase (EC 2.7.1.60)	bi
1	66	244	fig|6666666.904161.peg.66	hypothetical protein	bi
1	67	399	fig|6666666.904161.peg.67	Na+/H+ antiporter NapA	bi
1	68	503	fig|6666666.904161.peg.68	Predicted sialic acid transporter	bi
1	69	279	fig|6666666.904161.peg.69	lipase/esterase (putative)	bi
1	70	178	fig|6666666.904161.peg.70	lipase/esterase (putative)	bi
1	71	76	fig|6666666.904161.peg.71	lipase/esterase (putative)	uni
1	72	136	fig|6666666.904161.peg.72	FIG00746338: hypothetical protein	bi
1	73	274	fig|6666666.904161.peg.73	Sialic acid utilization regulator, RpiR family	bi
1	74	797	fig|6666666.904161.peg.74	Xylulose-5-phosphate phosphoketolase (EC 4.1.2.9) @ Fructose-6-phosphate phosphoketolase (EC 4.1.2.22)	bi
1	75	256	fig|6666666.904161.peg.75	Predicted transcriptional regulators	bi
1	76	157	fig|6666666.904161.peg.76	PTS system, galactitol-specific IIA component (EC 2.7.1.69)	bi
1	77	99	fig|6666666.904161.peg.77	PTS system, galactitol-specific IIB component (EC 2.7.1.200)	bi
1	78	424	fig|6666666.904161.peg.78	PTS system, galactitol-specific IIC component	bi
1	79	370	fig|6666666.904161.peg.79	Galactitol-1-phosphate 5-dehydrogenase (EC 1.1.1.251)	bi
1	80	208	fig|6666666.904161.peg.80	predicted phosphatases	bi
1	81	684	fig|6666666.904161.peg.81	hypothetical protein	bi
1	82	153	fig|6666666.904161.peg.82	Ascorbate-specific PTS system, EIIA component (EC 2.7.1.-)	bi
1	83	99	fig|6666666.904161.peg.83	PTS system, IIB component	bi
1	84	457	fig|6666666.904161.peg.84	PTS system, IIC component, UlaA-type	bi
1	85	218	fig|6666666.904161.peg.85	Transaldolase (EC 2.2.1.2)	bi
1	86	666	fig|6666666.904161.peg.86	Transketolase (EC 2.2.1.1)	bi
1	87	272	fig|6666666.904161.peg.87	Phosphatase YidA	bi
1	88	65	fig|6666666.904161.peg.88	Choloylglycine hydrolase (EC 3.5.1.24)	bi
1	89	392	fig|6666666.904161.peg.89	Transposase	-
1	90	216	fig|6666666.904161.peg.90	Choloylglycine hydrolase (EC 3.5.1.24)	uni
1	91	310	fig|6666666.904161.peg.91	Mobile element protein	uni
1	92	767	fig|6666666.904161.peg.92	Alpha-glucosidase (EC 3.2.1.20)	bi
1	93	474	fig|6666666.904161.peg.93	Uncharacterized MFS-type transporter	bi
1	94	326	fig|6666666.904161.peg.94	Transcriptional regulator, LacI family	bi
1	95	735	fig|6666666.904161.peg.95	Alpha,alpha-trehalose phosphorylase (2.4.1.64)	bi
1	96	284	fig|6666666.904161.peg.96	Beta-glucoside bgl operon antiterminator, BglG family	bi
1	97	666	fig|6666666.904161.peg.97	PTS system, beta-glucoside-specific IIB component / PTS system, beta-glucoside-specific IIC component / PTS system, beta-glucoside-specific IIA component	bi
1	98	488	fig|6666666.904161.peg.98	6-phospho-beta-glucosidase (EC 3.2.1.86)	bi
1	99	483	fig|6666666.904161.peg.99	6-phospho-beta-glucosidase (EC 3.2.1.86)	bi
1	100	282	fig|6666666.904161.peg.100	Beta-glucoside bgl operon antiterminator, BglG family	bi
1	101	625	fig|6666666.904161.peg.101	PTS system, beta-glucoside-specific IIB component / PTS system, beta-glucoside-specific IIC component / PTS system, beta-glucoside-specific IIA component	bi
1	102	487	fig|6666666.904161.peg.102	6-phospho-beta-glucosidase (EC 3.2.1.86)	bi
1	103	363	fig|6666666.904161.peg.103	Outer surface protein of unknown function, cellobiose operon	bi
1	104	303	fig|6666666.904161.peg.104	hypothetical protein	bi
1	105	317	fig|6666666.904161.peg.105	N-acetylmuramic acid 6-phosphate etherase (EC 4.2.1.126)	bi
1	106	446	fig|6666666.904161.peg.106	PTS system, cellobiose-specific IIC component	bi
1	107	244	fig|6666666.904161.peg.107	Predicted transcriptional regulator of N-Acetylglucosamine utilization, GntR family	bi
1	108	264	fig|6666666.904161.peg.108	Tributyrin esterase	bi
1	109	124	fig|6666666.904161.peg.109	integral membrane protein (putative)	bi
1	110	402	fig|6666666.904161.peg.110	Inner membrane transport protein YdiM	uni
1	111	293	fig|6666666.904161.peg.111	Transcriptional regulator, LysR family	bi
1	112	297	fig|6666666.904161.peg.112	Shikimate/quinate 5-dehydrogenase I beta (EC 1.1.1.282)	bi
1	113	411	fig|6666666.904161.peg.113	Inner membrane transport protein YdiM	uni
1	114	253	fig|6666666.904161.peg.114	3-dehydroquinate dehydratase I (EC 4.2.1.10)	bi
1	115	319	fig|6666666.904161.peg.115	FAD:protein FMN transferase (EC 2.7.1.180)	bi
1	116	764	fig|6666666.904161.peg.116	redox proteins related to the succinate dehydrogenases and fumarate reductases	bi
1	117	123	fig|6666666.904161.peg.117	Pyridoxamine 5'-phosphate oxidase (EC 1.4.3.5)	bi
1	118	341	fig|6666666.904161.peg.118	Oxidoreductase	bi
1	119	332	fig|6666666.904161.peg.119	Galactose operon repressor, GalR-LacI family of transcriptional regulators	bi
1	120	343	fig|6666666.904161.peg.120	Aldose 1-epimerase (EC 5.1.3.3)	bi
1	121	653	fig|6666666.904161.peg.121	Lactose and galactose permease, GPH translocator family	bi
1	122	739	fig|6666666.904161.peg.122	alpha-galactosidase (EC 3.2.1.22)	bi
1	123	320	fig|6666666.904161.peg.123	beta-galactosidase small subunit (EC 3.2.1.23)	bi
1	124	627	fig|6666666.904161.peg.124	beta-galactosidase large subunit (EC 3.2.1.23)	bi
1	125	388	fig|6666666.904161.peg.125	Galactokinase (EC 2.7.1.6)	bi
1	126	335	fig|6666666.904161.peg.126	UDP-glucose 4-epimerase (EC 5.1.3.2)	bi
1	127	488	fig|6666666.904161.peg.127	Galactose-1-phosphate uridylyltransferase (EC 2.7.7.10)	bi
1	128	334	fig|6666666.904161.peg.128	Galactose operon repressor, GalR-LacI family of transcriptional regulators	bi
1	129	45	fig|6666666.904161.peg.129	hypothetical protein	-
1	130	149	fig|6666666.904161.peg.130	Predicted transcriptional regulators	bi
1	131	54	fig|6666666.904161.peg.131	cell filamentation protein Fic	uni
1	132	57	fig|6666666.904161.peg.132	cell filamentation protein Fic	uni
1	133	82	fig|6666666.904161.peg.133	cell filamentation protein Fic	bi
1	134	329	fig|6666666.904161.peg.134	Transcriptional regulator of rhamnose utilization, AraC family	bi
1	135	426	fig|6666666.904161.peg.135	Predicted L-rhamnose permease RhaY	bi
1	136	526	fig|6666666.904161.peg.136	alpha-L-rhamnosidase (EC 3.2.1.40)	bi
1	137	427	fig|6666666.904161.peg.137	Predicted L-rhamnose permease RhaY	bi
1	138	651	fig|6666666.904161.peg.138	alpha-L-rhamnosidase (EC 3.2.1.40)	bi
1	139	464	fig|6666666.904161.peg.139	Na(+)-dependent branched-chain amino acid transporter	bi
1	140	56	fig|6666666.904161.peg.140	hypothetical protein	bi
1	141	579	fig|6666666.904161.peg.141	hypothetical protein	bi
1	142	217	fig|6666666.904161.peg.142	Aquaporin Z	bi
1	143	398	fig|6666666.904161.peg.143	hypothetical protein	bi
1	144	446	fig|6666666.904161.peg.144	hypothetical protein	bi
1	145	100	fig|6666666.904161.peg.145	hypothetical protein	bi
1	146	196	fig|6666666.904161.peg.146	hypothetical protein	bi
1	147	93	fig|6666666.904161.peg.147	FIG00751289: hypothetical protein	bi
1	148	191	fig|6666666.904161.peg.148	extracellular protein	bi
1	149	231	fig|6666666.904161.peg.149	extracellular protein	bi
1	150	338	fig|6666666.904161.peg.150	hypothetical protein	bi
1	151	717	fig|6666666.904161.peg.151	hypothetical protein	bi
1	152	451	fig|6666666.904161.peg.152	NADH peroxidase Npx (EC 1.11.1.1)	bi
1	153	158	fig|6666666.904161.peg.153	FIG00743617: hypothetical protein	bi
1	154	45	fig|6666666.904161.peg.154	hypothetical protein	bi
1	155	75	fig|6666666.904161.peg.155	hypothetical protein	bi
1	156	639	fig|6666666.904161.peg.156	Neutral endopeptidase O (EC 3.4.24.-)	bi
1	157	222	fig|6666666.904161.peg.157	Transcriptional regulator, Crp/Fnr family	bi
1	158	73	fig|6666666.904161.peg.158	Copper chaperone	bi
1	159	185	fig|6666666.904161.peg.159	DNA protection during starvation protein	bi
1	160	68	fig|6666666.904161.peg.160	hypothetical protein	bi
1	161	90	fig|6666666.904161.peg.161	hypothetical protein	bi
1	162	107	fig|6666666.904161.peg.162	Thioredoxin	bi
1	163	251	fig|6666666.904161.peg.163	Glycerol uptake facilitator protein	bi
1	164	635	fig|6666666.904161.peg.164	Probable cadmium-transporting ATPase (EC 3.6.3.3)	bi
1	165	324	fig|6666666.904161.peg.165	FIG00745430: hypothetical protein	bi
1	166	232	fig|6666666.904161.peg.166	hypothetical protein	bi
1	167	238	fig|6666666.904161.peg.167	Demethylmenaquinone methyltransferase (EC 2.1.1.163)	bi
1	168	318	fig|6666666.904161.peg.168	Predicted dye-decolorizing peroxidase (DyP), encapsulated subgroup	bi
1	169	193	fig|6666666.904161.peg.169	hypothetical protein	bi
1	170	71	fig|6666666.904161.peg.170	2-amino-3-carboxymuconate-6-semialdehyde decarboxylase (EC 4.1.1.45)	bi
1	171	117	fig|6666666.904161.peg.171	FIG00742340: hypothetical protein	bi
1	172	124	fig|6666666.904161.peg.172	hypothetical protein	bi
1	173	112	fig|6666666.904161.peg.173	FIG00743398: hypothetical protein	bi
1	174	352	fig|6666666.904161.peg.174	hypothetical protein	bi
1	175	470	fig|6666666.904161.peg.175	Glutamate decarboxylase (EC 4.1.1.15)	bi
1	176	66	fig|6666666.904161.peg.176	hypothetical protein	bi
1	177	554	fig|6666666.904161.peg.177	Phosphoenolpyruvate carboxykinase [ATP] (EC 4.1.1.49)	bi
1	178	213	fig|6666666.904161.peg.178	transcription regulator (putative)	bi
1	179	168	fig|6666666.904161.peg.179	Putative transcriptional regulator, MarR family	bi
1	180	246	fig|6666666.904161.peg.180	hypothetical protein	bi
1	181	270	fig|6666666.904161.peg.181	hypothetical protein	uni
1	182	123	fig|6666666.904161.peg.182	cell surface protein precursor	uni
1	183	124	fig|6666666.904161.peg.183	Mobile element protein	-
1	184	144	fig|6666666.904161.peg.184	Mobile element protein	-
1	185	200	fig|6666666.904161.peg.185	cell surface protein precursor	uni
1	186	1136	fig|6666666.904161.peg.186	hypothetical protein	bi
1	187	76	fig|6666666.904161.peg.187	extracellular protein	bi
1	188	102	fig|6666666.904161.peg.188	extracellular protein	uni
1	189	78	fig|6666666.904161.peg.189	cell surface protein precursor	bi
1	190	209	fig|6666666.904161.peg.190	cell surface protein precursor	uni
1	191	1136	fig|6666666.904161.peg.191	hypothetical protein	uni
1	192	323	fig|6666666.904161.peg.192	Extracellular protein	bi
1	193	108	fig|6666666.904161.peg.193	hypothetical protein	bi
1	194	191	fig|6666666.904161.peg.194	transcription regulator (putative)	bi
1	195	173	fig|6666666.904161.peg.195	O-acetyl-ADP-ribose deacetylase	bi
1	196	276	fig|6666666.904161.peg.196	Undecaprenyl-diphosphatase (EC 3.6.1.27)	bi
1	197	114	fig|6666666.904161.peg.197	hypothetical protein	bi
1	198	154	fig|6666666.904161.peg.198	Integral membrane protein	bi
1	199	251	fig|6666666.904161.peg.199	hypothetical protein	bi
1	200	287	fig|6666666.904161.peg.200	oxidoreductase of aldo/keto reductase family, subgroup 1	bi
1	201	311	fig|6666666.904161.peg.201	hypothetical protein	bi
1	202	517	fig|6666666.904161.peg.202	2',3'-cyclic-nucleotide 2'-phosphodiesterase (EC 3.1.4.16)	bi
1	203	871	fig|6666666.904161.peg.203	Cation-transporting ATPase, E1-E2 family	bi
1	204	158	fig|6666666.904161.peg.204	Nucleoside deoxyribosyltransferase (EC 2.4.2.6)	bi
1	205	157	fig|6666666.904161.peg.205	FIG00751277: hypothetical protein	bi
1	206	323	fig|6666666.904161.peg.206	Hydrolase, alpha/beta fold family	bi
1	207	408	fig|6666666.904161.peg.207	Uncharacterized MFS-type transporter	bi
1	208	458	fig|6666666.904161.peg.208	Cytosine/purine/uracil/thiamine/allantoin permease family protein	bi
1	209	129	fig|6666666.904161.peg.209	FIG00751229: hypothetical protein	bi
1	210	98	fig|6666666.904161.peg.210	hypothetical protein	bi
1	211	61	fig|6666666.904161.peg.211	hypothetical protein	bi
1	212	482	fig|6666666.904161.peg.212	Uncharacterized MFS-type transporter	bi
1	213	139	fig|6666666.904161.peg.213	FIG00748315: hypothetical protein	bi
1	214	91	fig|6666666.904161.peg.214	FIG00742662: hypothetical protein	bi
1	215	143	fig|6666666.904161.peg.215	Negative transcriptional regulator-copper transport operon	bi
1	216	680	fig|6666666.904161.peg.216	Lead, cadmium, zinc and mercury transporting ATPase (EC 3.6.3.3) (EC 3.6.3.5); Copper-translocating P-type ATPase (EC 3.6.3.4)	bi
1	217	329	fig|6666666.904161.peg.217	Choloylglycine hydrolase (EC 3.5.1.24)	bi
1	218	226	fig|6666666.904161.peg.218	hypothetical protein	bi
1	219	233	fig|6666666.904161.peg.219	hypothetical protein	bi
1	220	306	fig|6666666.904161.peg.220	Transport protein	bi
1	221	153	fig|6666666.904161.peg.221	acetyltransferase (putative)	bi
1	222	213	fig|6666666.904161.peg.222	Putative oxidoreductase	bi
1	223	48	fig|6666666.904161.peg.223	hypothetical protein	bi
1	224	113	fig|6666666.904161.peg.224	FIG00746147: hypothetical protein	bi
1	225	148	fig|6666666.904161.peg.225	small heat shock protein	bi
1	226	169	fig|6666666.904161.peg.226	FIG00754604: hypothetical protein	bi
1	227	122	fig|6666666.904161.peg.227	hypothetical protein	bi
1	228	367	fig|6666666.904161.peg.228	A/G-specific adenine glycosylase (EC 3.2.2.-)	bi
1	229	108	fig|6666666.904161.peg.229	hypothetical protein	bi
1	230	125	fig|6666666.904161.peg.230	DUF488 family protein SAV0238	bi
1	231	135	fig|6666666.904161.peg.231	negative regulator of proteolysis	bi
1	232	140	fig|6666666.904161.peg.232	Predicted transcriptional regulators	bi
1	233	287	fig|6666666.904161.peg.233	Complete genome	-
1	234	167	fig|6666666.904161.peg.234	Low temperature requirement C protein	bi
1	235	156	fig|6666666.904161.peg.235	FIG00742549: hypothetical protein	uni
1	236	134	fig|6666666.904161.peg.236	FIG00742549: hypothetical protein	bi
1	237	461	fig|6666666.904161.peg.237	D-serine/D-alanine/glycine transporter	bi
1	238	475	fig|6666666.904161.peg.238	Predicted tyrosine transporter, NhaC family	bi
1	239	102	fig|6666666.904161.peg.239	FIG00747402: hypothetical protein	bi
1	240	367	fig|6666666.904161.peg.240	Glucosamine--fructose-6-phosphate aminotransferase [isomerizing] (EC 2.6.1.16)	bi
1	241	564	fig|6666666.904161.peg.241	Adenine deaminase (EC 3.5.4.2)	bi
1	242	302	fig|6666666.904161.peg.242	hypothetical protein	bi
1	243	102	fig|6666666.904161.peg.243	FIG00746607: hypothetical protein	uni
1	244	223	fig|6666666.904161.peg.244	FIG00750730: hypothetical protein	bi
1	245	60	fig|6666666.904161.peg.245	hypothetical protein	bi
1	246	615	fig|6666666.904161.peg.246	Lead, cadmium, zinc and mercury transporting ATPase (EC 3.6.3.3) (EC 3.6.3.5); Copper-translocating P-type ATPase (EC 3.6.3.4)	bi
1	247	556	fig|6666666.904161.peg.247	Betaine/carnitine/choline transporter (BCCT) family	bi
1	248	41	fig|6666666.904161.peg.248	FIG00752350: hypothetical protein	uni
1	249	214	fig|6666666.904161.peg.249	FIG00744455: hypothetical protein	bi
1	250	143	fig|6666666.904161.peg.250	hypothetical protein	bi
1	251	82	fig|6666666.904161.peg.251	hypothetical protein	bi
1	252	175	fig|6666666.904161.peg.252	HIT family protein	bi
1	253	307	fig|6666666.904161.peg.253	Putative oxidoreductase SCO7655	bi
1	254	104	fig|6666666.904161.peg.254	PaaD-like protein (DUF59) involved in Fe-S cluster assembly	bi
1	255	274	fig|6666666.904161.peg.255	Pyruvate formate-lyase activating enzyme (EC 1.97.1.4)	bi
1	256	753	fig|6666666.904161.peg.256	Pyruvate formate-lyase (EC 2.3.1.54)	bi
1	257	330	fig|6666666.904161.peg.257	Beta-lactamase class C-like and penicillin binding proteins (PBPs) superfamily	bi
1	258	172	fig|6666666.904161.peg.258	hypothetical protein	bi
1	259	49	fig|6666666.904161.peg.259	hypothetical protein	bi
1	260	87	fig|6666666.904161.peg.260	hypothetical protein	bi
1	261	59	fig|6666666.904161.peg.261	hypothetical protein	bi
1	262	472	fig|6666666.904161.peg.262	Uncharacterized MFS-type transporter	bi
1	263	308	fig|6666666.904161.peg.263	Zinc ABC transporter, substrate-binding protein ZnuA	bi
1	264	178	fig|6666666.904161.peg.264	hypothetical protein	bi
1	265	51	fig|6666666.904161.peg.265	hypothetical protein	bi
1	266	123	fig|6666666.904161.peg.266	Dihydroneopterin aldolase (EC 4.1.2.25)	bi
1	267	171	fig|6666666.904161.peg.267	2-amino-4-hydroxy-6-hydroxymethyldihydropteridine pyrophosphokinase (EC 2.7.6.3)	bi
1	268	190	fig|6666666.904161.peg.268	GTP cyclohydrolase I (EC 3.5.4.16) type 1	bi
1	269	455	fig|6666666.904161.peg.269	Dihydrofolate synthase (EC 6.3.2.12) @ Folylpolyglutamate synthase (EC 6.3.2.17)	bi
1	270	196	fig|6666666.904161.peg.270	Nucleoside 5-triphosphatase RdgB (dHAPTP, dITP, XTP-specific) (EC 3.6.1.66)	bi
1	271	383	fig|6666666.904161.peg.271	Dihydropteroate synthase (EC 2.5.1.15)	bi
1	272	183	fig|6666666.904161.peg.272	DNA-3-methyladenine glycosylase (EC 3.2.2.20)	bi
1	273	57	fig|6666666.904161.peg.273	hypothetical protein	bi
1	274	296	fig|6666666.904161.peg.274	Cobalt/zinc/cadmium resistance protein CzcD	bi
1	275	115	fig|6666666.904161.peg.275	Transcriptional regulator, ArsR family	bi
1	276	213	fig|6666666.904161.peg.276	FIG01964566: Predicted membrane protein, hemolysin III homolog	bi
1	277	103	fig|6666666.904161.peg.277	Quaternary ammonium compound-resistance protein SugE	bi
1	278	127	fig|6666666.904161.peg.278	hypothetical protein	bi
1	279	373	fig|6666666.904161.peg.279	Methionine synthase II (cobalamin-independent)	bi
1	280	41	fig|6666666.904161.peg.280	hypothetical protein	bi
1	281	349	fig|6666666.904161.peg.281	UPF0118 membrane protein YdbI	bi
1	282	315	fig|6666666.904161.peg.282	hypothetical protein	bi
1	283	681	fig|6666666.904161.peg.283	Kup system potassium uptake protein	bi
1	284	475	fig|6666666.904161.peg.284	Uncharacterized amino acid permease, GabP family	bi
1	285	42	fig|6666666.904161.peg.285	hypothetical protein	-
1	286	161	fig|6666666.904161.peg.286	hypothetical protein	bi
1	287	50	fig|6666666.904161.peg.287	hypothetical protein	bi
1	288	483	fig|6666666.904161.peg.288	Cardiolipin synthase, bacterial type ClsA	bi
1	289	262	fig|6666666.904161.peg.289	protein tyrosine/serine phosphatase	bi
1	290	326	fig|6666666.904161.peg.290	GMP reductase (EC 1.7.1.7)	bi
1	291	430	fig|6666666.904161.peg.291	Adenylosuccinate synthetase (EC 6.3.4.4)	bi
1	292	433	fig|6666666.904161.peg.292	Adenylosuccinate lyase (EC 4.3.2.2) @ SAICAR lyase (EC 4.3.2.2)	bi
1	293	110	fig|6666666.904161.peg.293	FIG00752856: hypothetical protein	bi
1	294	445	fig|6666666.904161.peg.294	similar to glutathione reductase	bi
1	295	371	fig|6666666.904161.peg.295	Glycerate kinase (EC 2.7.1.31)	bi
1	296	314	fig|6666666.904161.peg.296	Hydrolase, alpha/beta fold family	bi
1	297	294	fig|6666666.904161.peg.297	Dehydrosqualene synthase (EC 2.5.1.96)	bi
1	298	499	fig|6666666.904161.peg.298	Dehydrosqualene desaturase (EC 1.3.8.2)	bi
1	299	43	fig|6666666.904161.peg.299	hypothetical protein	bi
1	300	233	fig|6666666.904161.peg.300	Putative membrane protease YugP	bi
1	301	56	fig|6666666.904161.peg.301	hypothetical protein	bi
1	302	292	fig|6666666.904161.peg.302	DegV family protein	bi
1	303	243	fig|6666666.904161.peg.303	LrgA-associated membrane protein LrgB	bi
1	304	140	fig|6666666.904161.peg.304	Antiholin-like protein LrgA	bi
1	305	48	fig|6666666.904161.peg.305	hypothetical protein	bi
1	306	184	fig|6666666.904161.peg.306	hypothetical protein	bi
1	307	138	fig|6666666.904161.peg.307	3',5'-cyclic-nucleotide phosphodiesterase (EC 3.1.4.17)	bi
1	308	115	fig|6666666.904161.peg.308	3',5'-cyclic-nucleotide phosphodiesterase (EC 3.1.4.17)	uni
1	309	76	fig|6666666.904161.peg.309	FIG00745707: hypothetical protein	bi
1	310	119	fig|6666666.904161.peg.310	bacteriocin immunity protein	bi
1	311	161	fig|6666666.904161.peg.311	Peroxide stress regulator PerR, FUR family	bi
1	312	200	fig|6666666.904161.peg.312	hypothetical protein	bi
1	313	419	fig|6666666.904161.peg.313	Siderophore/Surfactin synthetase related protein	bi
1	314	147	fig|6666666.904161.peg.314	chromate reductase	bi
1	315	86	fig|6666666.904161.peg.315	FIG00744682: hypothetical protein	bi
1	316	223	fig|6666666.904161.peg.316	Endonuclease III (EC 4.2.99.18)	bi
1	317	665	fig|6666666.904161.peg.317	PTS system, trehalose-specific IIB component (EC 2.7.1.201) / PTS system, trehalose-specific IIC component	bi
1	318	294	fig|6666666.904161.peg.318	hypothetical protein	bi
1	319	153	fig|6666666.904161.peg.319	Predicted transcriptional regulator	bi
1	320	124	fig|6666666.904161.peg.320	Mobile element protein	-
1	321	144	fig|6666666.904161.peg.321	Mobile element protein	-
1	322	635	fig|6666666.904161.peg.322	Transcription antiterminator, BglG family	bi
1	323	154	fig|6666666.904161.peg.323	PTS IIA-like nitrogen-regulatory protein PtsN	bi
1	324	107	fig|6666666.904161.peg.324	PTS system, IIB component	bi
1	325	367	fig|6666666.904161.peg.325	PTS system, IIC component	bi
1	326	877	fig|6666666.904161.peg.326	glycosyl hydrolase, family 38	bi
1	327	288	fig|6666666.904161.peg.327	Fructokinase (EC 2.7.1.4)	bi
1	328	275	fig|6666666.904161.peg.328	Hydrolase, HAD superfamily	bi
1	329	284	fig|6666666.904161.peg.329	Oxidoreductase	bi
1	330	148	fig|6666666.904161.peg.330	hypothetical protein	bi
1	331	482	fig|6666666.904161.peg.331	RNA methyltransferase, TrmA family	bi
1	332	217	fig|6666666.904161.peg.332	Probable iron export ATP-binding protein FetA	bi
1	333	252	fig|6666666.904161.peg.333	Probable iron export permease protein FetB	bi
1	334	362	fig|6666666.904161.peg.334	hypothetical protein	bi
1	335	50	fig|6666666.904161.peg.335	hypothetical protein	-
1	336	334	fig|6666666.904161.peg.336	Transcriptional regulator	bi
1	337	556	fig|6666666.904161.peg.337	Family 13 glycosyl hydrolase, row 724	bi
1	338	642	fig|6666666.904161.peg.338	PTS system, sucrose-specific IIB component (EC 2.7.1.211) / PTS system, sucrose-specific IIC component / PTS system, sucrose-specific IIA component (EC 2.7.1.211)	bi
1	339	312	fig|6666666.904161.peg.339	FIG00743812: hypothetical protein	bi
1	340	213	fig|6666666.904161.peg.340	integral membrane protein (putative)	bi
1	341	106	fig|6666666.904161.peg.341	Transcriptional regulator, PadR family	bi
1	342	192	fig|6666666.904161.peg.342	FIG00743918: hypothetical protein	bi
1	343	272	fig|6666666.904161.peg.343	hypothetical protein	bi
1	344	254	fig|6666666.904161.peg.344	ABC transporter, ATP-binding protein (cluster 3, basic aa/glutamine/opines)	bi
1	345	236	fig|6666666.904161.peg.345	ABC transporter, permease protein (cluster 3, basic aa/glutamine/opines)	bi
1	346	268	fig|6666666.904161.peg.346	ABC transporter, substrate-binding protein (cluster 3, basic aa/glutamine/opines)	bi
1	347	409	fig|6666666.904161.peg.347	Aspartate aminotransferase (AspB-4) (EC 2.6.1.1)	bi
1	348	299	fig|6666666.904161.peg.348	Transcriptional regulator, LysR family	bi
1	349	278	fig|6666666.904161.peg.349	cell surface hydrolase (putative)	bi
1	350	532	fig|6666666.904161.peg.350	hypothetical protein	uni
1	351	168	fig|6666666.904161.peg.351	Mobile element protein	-
1	352	437	fig|6666666.904161.peg.352	hypothetical protein	bi
1	353	428	fig|6666666.904161.peg.353	Pyrimidine nucleoside transporter	bi
1	354	245	fig|6666666.904161.peg.354	16S rRNA (guanine(527)-N(7))-methyltransferase (EC 2.1.1.170)	bi
1	355	284	fig|6666666.904161.peg.355	Chromosome (plasmid) partitioning protein ParB-2	bi
1	356	256	fig|6666666.904161.peg.356	Chromosome (plasmid) partitioning protein ParA	bi
1	357	297	fig|6666666.904161.peg.357	Chromosome (plasmid) partitioning protein ParB	bi
1	358	64	fig|6666666.904161.peg.358	Uncharacterized protein CAC3725	bi
1	359	367	fig|6666666.904161.peg.359	GTP-binding and nucleic acid-binding protein YchF	bi
1	360	242	fig|6666666.904161.peg.360	hypothetical protein	bi
1	361	384	fig|6666666.904161.peg.361	Inosine-5'-monophosphate dehydrogenase (EC 1.1.1.205) / CBS domain	bi
1	362	310	fig|6666666.904161.peg.362	Foldase protein PrsA precursor (EC 5.2.1.8)	bi
1	363	230	fig|6666666.904161.peg.363	putative membrane protein	bi
1	364	230	fig|6666666.904161.peg.364	Two-component transcriptional response regulator, OmpR family	bi
1	365	387	fig|6666666.904161.peg.365	Two-component system sensor histidine kinase	bi
1	366	445	fig|6666666.904161.peg.366	D-alanyl-D-alanine carboxypeptidase (EC 3.4.16.4)	bi
1	367	38	fig|6666666.904161.peg.367	hypothetical protein	bi
1	368	166	fig|6666666.904161.peg.368	phosphinothricin N-acetyltransferase( EC:2.3.1.- )	bi
1	369	255	fig|6666666.904161.peg.369	branched-chain amino acid transport protein	bi
1	370	117	fig|6666666.904161.peg.370	FIG00742167: hypothetical protein	bi
1	371	241	fig|6666666.904161.peg.371	hypothetical protein	bi
1	372	40	fig|6666666.904161.peg.372	hypothetical protein	bi
1	373	43	fig|6666666.904161.peg.373	hypothetical protein	bi
1	374	76	fig|6666666.904161.peg.374	hypothetical protein	bi
1	375	124	fig|6666666.904161.peg.375	Mobile element protein	-
1	376	144	fig|6666666.904161.peg.376	Mobile element protein	-
1	377	145	fig|6666666.904161.peg.377	FIG00752687: hypothetical protein	bi
1	378	185	fig|6666666.904161.peg.378	hypothetical protein	bi
1	379	121	fig|6666666.904161.peg.379	putative membrane protein	bi
1	380	129	fig|6666666.904161.peg.380	serine/threonine protein kinase( EC:2.7.1.- )	uni
1	381	233	fig|6666666.904161.peg.381	serine/threonine protein kinase( EC:2.7.1.- )	bi
1	382	305	fig|6666666.904161.peg.382	putative membrane protein	bi
1	383	398	fig|6666666.904161.peg.383	Cyclopropane-fatty-acyl-phospholipid synthase (EC 2.1.1.79)	bi
1	384	346	fig|6666666.904161.peg.384	hypothetical protein	bi
1	385	385	fig|6666666.904161.peg.385	Putative ROK-family transcriptional regulator	bi
1	386	358	fig|6666666.904161.peg.386	UPF0118 membrane protein YdbI	bi
1	387	231	fig|6666666.904161.peg.387	Phosphoglycerate mutase (EC 5.4.2.11)	bi
1	388	83	fig|6666666.904161.peg.388	hypothetical protein	bi
1	389	39	fig|6666666.904161.peg.389	hypothetical protein	-
1	390	297	fig|6666666.904161.peg.390	Efflux ABC transporter, ATP-binding protein	uni
1	391	253	fig|6666666.904161.peg.391	hypothetical protein	uni
1	392	255	fig|6666666.904161.peg.392	hypothetical protein	uni
1	393	122	fig|6666666.904161.peg.393	Transcriptional regulator, XRE family	uni
1	394	364	fig|6666666.904161.peg.394	(R)-2-hydroxyacid dehydrogenase, similar to L-sulfolactate dehydrogenase (EC 1.1.1.272)	bi
1	395	49	fig|6666666.904161.peg.395	FIG00746089: hypothetical protein	bi
1	396	189	fig|6666666.904161.peg.396	hypothetical protein	bi
1	397	238	fig|6666666.904161.peg.397	Methionine ABC transporter ATP-binding protein	bi
1	398	427	fig|6666666.904161.peg.398	hypothetical protein	bi
1	399	87	fig|6666666.904161.peg.399	Transcriptional regulator, HxlR family	bi
1	400	196	fig|6666666.904161.peg.400	D-lactate dehydratase (EC 4.2.1.130)	bi
1	401	92	fig|6666666.904161.peg.401	hypothetical protein	bi
1	402	422	fig|6666666.904161.peg.402	hypothetical protein	bi
1	403	123	fig|6666666.904161.peg.403	hypothetical protein	bi
1	404	44	fig|6666666.904161.peg.404	transcriptional regulator, MerR family	bi
1	405	166	fig|6666666.904161.peg.405	hypothetical protein	bi
1	406	453	fig|6666666.904161.peg.406	PTS system, cellobiose-specific IIC component	bi
1	407	478	fig|6666666.904161.peg.407	6-phospho-beta-glucosidase (EC 3.2.1.86)	bi
1	408	242	fig|6666666.904161.peg.408	Transcriptional regulator	bi
1	409	156	fig|6666666.904161.peg.409	DNA protection during starvation protein	bi
1	410	1207	fig|6666666.904161.peg.410	hypothetical protein	bi
1	411	43	fig|6666666.904161.peg.411	hypothetical protein	bi
1	412	494	fig|6666666.904161.peg.412	Fumarate reductase flavoprotein subunit (EC 1.3.99.1)	bi
1	413	303	fig|6666666.904161.peg.413	Predicted transcriptional regulators	bi
1	414	275	fig|6666666.904161.peg.414	NADH pyrophosphatase (EC 3.6.1.22), decaps 5'-NAD modified RNA	bi
1	415	534	fig|6666666.904161.peg.415	Na(+)/H(+) antiporter	bi
1	416	596	fig|6666666.904161.peg.416	Translation elongation factor LepA	bi
1	417	221	fig|6666666.904161.peg.417	transctiptional regulator, TetR family	bi
1	418	38	fig|6666666.904161.peg.418	hypothetical protein	-
1	419	441	fig|6666666.904161.peg.419	hypothetical protein	uni
1	420	124	fig|6666666.904161.peg.420	Mobile element protein	-
1	421	144	fig|6666666.904161.peg.421	Mobile element protein	-
1	422	189	fig|6666666.904161.peg.422	hypothetical protein	uni
1	423	346	fig|6666666.904161.peg.423	NAD-dependent, hopanoid-associated epimerase/dehydratase family acting on nucleotide-sugars	bi
1	424	189	fig|6666666.904161.peg.424	Transcriptional regulator, AcrR family	bi
1	425	177	fig|6666666.904161.peg.425	Transposase	uni
1	426	296	fig|6666666.904161.peg.426	Putative transposase InsK for insertion sequence element IS150	uni
1	427	243	fig|6666666.904161.peg.427	Oxidoreductase, short-chain dehydrogenase/reductase family	bi
1	428	122	fig|6666666.904161.peg.428	Transcriptional regulator, HxlR family	bi
1	429	95	fig|6666666.904161.peg.429	hypothetical protein	bi
1	430	861	fig|6666666.904161.peg.430	hypothetical protein	bi
1	431	471	fig|6666666.904161.peg.431	Succinate-semialdehyde dehydrogenase [NAD] (EC 1.2.1.24); Succinate-semialdehyde dehydrogenase [NADP+] (EC 1.2.1.79)	bi
1	432	305	fig|6666666.904161.peg.432	FIG00744500: hypothetical protein	bi
1	433	189	fig|6666666.904161.peg.433	Transcription regulator of multidrug efflux pump operon, TetR (AcrR) family	bi
1	434	417	fig|6666666.904161.peg.434	hypothetical protein	bi
1	435	249	fig|6666666.904161.peg.435	hypothetical protein	bi
1	436	634	fig|6666666.904161.peg.436	Asparagine synthetase [glutamine-hydrolyzing] (EC 6.3.5.4)	bi
1	437	210	fig|6666666.904161.peg.437	D-alanyl-D-alanine carboxypeptidase (EC 3.4.16.4)	bi
1	438	402	fig|6666666.904161.peg.438	Uncharacterized MFS-type transporter YtbD	bi
1	439	121	fig|6666666.904161.peg.439	Transcriptional regulator, HxlR family	bi
1	440	218	fig|6666666.904161.peg.440	hydrolase, haloacid dehalogenase-like family	bi
1	441	275	fig|6666666.904161.peg.441	hypothetical protein	bi
1	442	924	fig|6666666.904161.peg.442	hypothetical protein	bi
1	443	124	fig|6666666.904161.peg.443	cell surface protein precursor	bi
1	444	203	fig|6666666.904161.peg.444	hypothetical protein	bi
1	445	347	fig|6666666.904161.peg.445	cell surface protein precursor	bi
1	446	211	fig|6666666.904161.peg.446	hypothetical protein	bi
1	447	132	fig|6666666.904161.peg.447	hypothetical protein	bi
1	448	323	fig|6666666.904161.peg.448	Putative oxidoreductase	bi
1	449	144	fig|6666666.904161.peg.449	Mobile element protein	-
1	450	124	fig|6666666.904161.peg.450	Mobile element protein	-
1	451	235	fig|6666666.904161.peg.451	hypothetical protein	bi
1	452	355	fig|6666666.904161.peg.452	cell surface protein precursor	bi
1	453	142	fig|6666666.904161.peg.453	hypothetical protein	bi
1	454	496	fig|6666666.904161.peg.454	hypothetical protein	bi
1	455	443	fig|6666666.904161.peg.455	hypothetical protein	bi
1	456	85	fig|6666666.904161.peg.456	FIG00752248: hypothetical protein	bi
1	457	45	fig|6666666.904161.peg.457	hypothetical protein	bi
1	458	254	fig|6666666.904161.peg.458	Predicted transcriptional regulators	bi
1	459	1406	fig|6666666.904161.peg.459	hypothetical protein	bi
1	460	125	fig|6666666.904161.peg.460	Copper-transporting ATPase	bi
1	461	90	fig|6666666.904161.peg.461	Copper-exporting ATPase (EC 3.6.3.4)	bi
1	462	642	fig|6666666.904161.peg.462	Lead, cadmium, zinc and mercury transporting ATPase (EC 3.6.3.3) (EC 3.6.3.5); Copper-translocating P-type ATPase (EC 3.6.3.4)	bi
1	463	374	fig|6666666.904161.peg.463	Alcohol dehydrogenase (EC 1.1.1.1)	bi
1	464	391	fig|6666666.904161.peg.464	1,3-propanediol dehydrogenase (EC 1.1.1.202)	bi
1	465	132	fig|6666666.904161.peg.465	Aggregation promoting factor	bi
1	466	495	fig|6666666.904161.peg.466	Inner membrane transporter YjeM	bi
1	467	274	fig|6666666.904161.peg.467	Transcriptional regulator, Xre family	bi
1	468	142	fig|6666666.904161.peg.468	FIG00752978: hypothetical protein	bi
1	469	46	fig|6666666.904161.peg.469	hypothetical protein	bi
1	470	297	fig|6666666.904161.peg.470	Oxidoreductase, short-chain dehydrogenase/reductase family	bi
1	471	400	fig|6666666.904161.peg.471	N-acyl-L-amino acid amidohydrolase (EC 3.5.1.14)	bi
1	472	96	fig|6666666.904161.peg.472	hypothetical protein	bi
1	473	575	fig|6666666.904161.peg.473	Heterodimeric efflux ABC transporter, multidrug resistance => LmrC subunit of LmrCD	bi
1	474	594	fig|6666666.904161.peg.474	Heterodimeric efflux ABC transporter, multidrug resistance => LmrD subunit of LmrCD	bi
1	475	397	fig|6666666.904161.peg.475	ABC transporter, permease protein	bi
1	476	507	fig|6666666.904161.peg.476	hypothetical protein	bi
1	477	142	fig|6666666.904161.peg.477	hypothetical protein	bi
1	478	379	fig|6666666.904161.peg.478	GGDEF domain protein	bi
1	479	215	fig|6666666.904161.peg.479	DNA-3-methyladenine glycosylase (EC 3.2.2.20)	bi
1	480	175	fig|6666666.904161.peg.480	FIG00742345: hypothetical protein	bi
1	481	298	fig|6666666.904161.peg.481	Zinc ABC transporter, substrate-binding protein ZnuA	bi
1	482	116	fig|6666666.904161.peg.482	hypothetical protein	bi
1	483	198	fig|6666666.904161.peg.483	hypothetical protein	bi
1	484	221	fig|6666666.904161.peg.484	extracellular protein	bi
1	485	205	fig|6666666.904161.peg.485	FIG00752425: hypothetical protein	bi
1	486	148	fig|6666666.904161.peg.486	Transcriptional regulator, MerR family	bi
1	487	340	fig|6666666.904161.peg.487	hypothetical protein	bi
1	488	461	fig|6666666.904161.peg.488	6-phospho-beta-glucosidase (EC 3.2.1.86)	bi
1	489	491	fig|6666666.904161.peg.489	PTS system, cellobiose-specific IIC component	bi
1	490	109	fig|6666666.904161.peg.490	PTS system, cellobiose-specific IIB component (EC 2.7.1.205)	bi
1	491	149	fig|6666666.904161.peg.491	phosphoenolpyruvate-dependent sugar phosphotransferase system EIIABC, glucose specific	bi
1	492	274	fig|6666666.904161.peg.492	Predicted transcriptional regulators	bi
1	493	105	fig|6666666.904161.peg.493	FIG00747568: hypothetical protein	bi
1	494	279	fig|6666666.904161.peg.494	Diadenosine tetraphosphatase and related serine/threonine protein phosphatases	bi
1	495	121	fig|6666666.904161.peg.495	hypothetical protein	bi
1	496	1113	fig|6666666.904161.peg.496	hypothetical protein	bi
1	497	667	fig|6666666.904161.peg.497	Macrolide export ATP-binding/permease protein	bi
1	498	189	fig|6666666.904161.peg.498	Transport protein	bi
1	499	105	fig|6666666.904161.peg.499	Transcriptional regulator, ArsR family	bi
1	500	227	fig|6666666.904161.peg.500	hypothetical protein	bi
1	501	91	fig|6666666.904161.peg.501	FIG00752992: hypothetical protein	bi
1	502	144	fig|6666666.904161.peg.502	Universal stress protein family	bi
1	503	531	fig|6666666.904161.peg.503	Manganese transport protein MntH	bi
1	504	272	fig|6666666.904161.peg.504	Transcriptional regulator, Xre family	bi
1	505	41	fig|6666666.904161.peg.505	hypothetical protein	bi
1	506	162	fig|6666666.904161.peg.506	Teichoic acid glycosylation protein	bi
1	507	267	fig|6666666.904161.peg.507	hypothetical protein	bi
1	508	307	fig|6666666.904161.peg.508	Mobile element protein	bi
1	509	73	fig|6666666.904161.peg.509	FIG00743269: hypothetical protein	bi
1	510	31	fig|6666666.904161.peg.510	hypothetical protein	bi
1	511	398	fig|6666666.904161.peg.511	Branched-chain amino acid ABC transporter, substrate-binding protein LivJ (TC 3.A.1.4.1)	bi
1	512	286	fig|6666666.904161.peg.512	Branched-chain amino acid ABC transporter, permease protein LivH (TC 3.A.1.4.1)	bi
1	513	321	fig|6666666.904161.peg.513	Branched-chain amino acid ABC transporter, permease protein LivM (TC 3.A.1.4.1)	bi
1	514	260	fig|6666666.904161.peg.514	Branched-chain amino acid ABC transporter, ATP-binding protein LivG (TC 3.A.1.4.1)	bi
1	515	235	fig|6666666.904161.peg.515	Branched-chain amino acid ABC transporter, ATP-binding protein LivF (TC 3.A.1.4.1)	bi
1	516	75	fig|6666666.904161.peg.516	CBS domain protein	uni
1	517	132	fig|6666666.904161.peg.517	CBS domain protein	bi
1	518	252	fig|6666666.904161.peg.518	hypothetical protein	bi
1	519	348	fig|6666666.904161.peg.519	FIG00749210: hypothetical protein	bi
1	520	126	fig|6666666.904161.peg.520	hypothetical protein	bi
1	521	503	fig|6666666.904161.peg.521	hypothetical protein	bi
1	522	322	fig|6666666.904161.peg.522	ABC transporter, substrate-binding protein (cluster 15, trp?)	bi
1	523	334	fig|6666666.904161.peg.523	ABC transporter, permease protein (cluster 15, trp?)	bi
1	524	229	fig|6666666.904161.peg.524	ABC transporter, ATP-binding protein (cluster 15, trp?)	bi
1	525	606	fig|6666666.904161.peg.525	PTS system, N-acetylglucosamine-specific IIC component / PTS system, N-acetylglucosamine-specific IIB component (EC 2.7.1.193)	bi
1	526	218	fig|6666666.904161.peg.526	Nitroreductase	bi
1	527	270	fig|6666666.904161.peg.527	HMP-PP hydrolase (pyridoxal phosphatase) Cof, detected in genetic screen for thiamin metabolic genes (PMID:15292217)	uni
1	528	314	fig|6666666.904161.peg.528	hypothetical protein	uni
1	529	176	fig|6666666.904161.peg.529	Transcriptional regulator, MarR family	bi
1	530	359	fig|6666666.904161.peg.530	Efflux ABC transporter, permease/ATP-binding protein	uni
1	531	244	fig|6666666.904161.peg.531	Efflux ABC transporter, permease/ATP-binding protein	bi
1	532	173	fig|6666666.904161.peg.532	hypothetical protein	bi
1	533	735	fig|6666666.904161.peg.533	hypothetical protein	bi
1	534	296	fig|6666666.904161.peg.534	N-acetylmannosamine kinase (EC 2.7.1.60)	bi
1	535	101	fig|6666666.904161.peg.535	hypothetical protein	bi
1	536	207	fig|6666666.904161.peg.536	hypothetical protein	bi
1	537	308	fig|6666666.904161.peg.537	metal-dependent hydrolase (putative)	bi
1	538	234	fig|6666666.904161.peg.538	Acyltransferase	bi
1	539	302	fig|6666666.904161.peg.539	hypothetical protein	bi
1	540	618	fig|6666666.904161.peg.540	hypothetical protein	bi
1	541	470	fig|6666666.904161.peg.541	Esterase/lipase	bi
1	542	365	fig|6666666.904161.peg.542	hypothetical protein	bi
1	543	43	fig|6666666.904161.peg.543	Lysophospholipase L2 (EC 3.1.1.5)	bi
1	544	203	fig|6666666.904161.peg.544	hypothetical protein	uni
1	545	86	fig|6666666.904161.peg.545	FIG00747736: hypothetical protein	bi
1	546	50	fig|6666666.904161.peg.546	hypothetical protein	bi
1	547	325	fig|6666666.904161.peg.547	FIG028593: membrane protein	bi
1	548	483	fig|6666666.904161.peg.548	hypothetical protein	bi
1	549	491	fig|6666666.904161.peg.549	UbiD family decarboxylase, Lactobacillus brevis type	bi
1	550	460	fig|6666666.904161.peg.550	putative sodium:sulfate symporter	bi
1	551	301	fig|6666666.904161.peg.551	hypothetical protein	bi
1	552	54	fig|6666666.904161.peg.552	hypothetical protein	bi
1	553	420	fig|6666666.904161.peg.553	hypothetical protein	bi
1	554	65	fig|6666666.904161.peg.554	hypothetical protein	bi
1	555	335	fig|6666666.904161.peg.555	tRNA-dihydrouridine synthase 2	bi
1	556	334	fig|6666666.904161.peg.556	FAD:protein FMN transferase (EC 2.7.1.180)	bi
1	557	137	fig|6666666.904161.peg.557	Peptide deformylase (EC 3.5.1.88)	bi
1	558	158	fig|6666666.904161.peg.558	hypothetical protein	bi
1	559	741	fig|6666666.904161.peg.559	Ribonucleotide reductase of class III (anaerobic), large subunit (EC 1.17.4.2)	bi
1	560	183	fig|6666666.904161.peg.560	Ribonucleotide reductase of class III (anaerobic), activating protein (EC 1.97.1.4)	bi
1	561	227	fig|6666666.904161.peg.561	hypothetical protein	bi
1	562	182	fig|6666666.904161.peg.562	protein containing diguanylate cyclase/phosphodiesterase domain 1 (GGDEF)	uni
1	563	310	fig|6666666.904161.peg.563	Mobile element protein	uni
1	564	202	fig|6666666.904161.peg.564	protein containing diguanylate cyclase/phosphodiesterase domain 1 (GGDEF)	bi
1	565	178	fig|6666666.904161.peg.565	beta-glucosides PTS, EIIABC( EC:2.7.1.69 )	bi
1	566	81	fig|6666666.904161.peg.566	hypothetical protein	bi
1	567	835	fig|6666666.904161.peg.567	Cell surface protein	bi
1	568	240	fig|6666666.904161.peg.568	hypothetical protein	bi
1	569	277	fig|6666666.904161.peg.569	lipase/esterase (putative)	bi
1	570	432	fig|6666666.904161.peg.570	Alkaline phosphodiesterase I (EC 3.1.4.1) / Nucleotide pyrophosphatase (EC 3.6.1.9)	bi
1	571	417	fig|6666666.904161.peg.571	Uncharacterized MFS-type transporter YxiO	bi
1	572	304	fig|6666666.904161.peg.572	Predicted transcriptional regulators	bi
1	573	405	fig|6666666.904161.peg.573	hypothetical protein	bi
1	574	836	fig|6666666.904161.peg.574	Excinuclease ABC subunit A paralog of unknown function	bi
1	575	642	fig|6666666.904161.peg.575	Integral membrane protein	bi
1	576	265	fig|6666666.904161.peg.576	hydrolase, HAD superfamily, Cof family	bi
1	577	541	fig|6666666.904161.peg.577	Bis-ABC ATPase YbiT	bi
1	578	402	fig|6666666.904161.peg.578	hypothetical protein	bi
1	579	176	fig|6666666.904161.peg.579	GCN5-related N-acetyltransferase	bi
1	580	39	fig|6666666.904161.peg.580	hypothetical protein	-
1	581	182	fig|6666666.904161.peg.581	acetyltransferase (putative)	bi
1	582	314	fig|6666666.904161.peg.582	DNA-entry nuclease (Competence-specific nuclease) (EC 3.1.30.-)	bi
1	583	110	fig|6666666.904161.peg.583	regulatory protein, ArsR	bi
1	584	185	fig|6666666.904161.peg.584	FIG00743766: hypothetical protein	bi
1	585	1220	fig|6666666.904161.peg.585	hypothetical protein	bi
1	586	115	fig|6666666.904161.peg.586	hypothetical protein	bi
1	587	76	fig|6666666.904161.peg.587	hypothetical protein	bi
1	588	175	fig|6666666.904161.peg.588	hypothetical protein	-
1	589	465	fig|6666666.904161.peg.589	Uncharacterized MFS-type transporter	bi
1	590	584	fig|6666666.904161.peg.590	Efflux ABC transporter, permease/ATP-binding protein MdlA	bi
1	591	596	fig|6666666.904161.peg.591	Efflux ABC transporter, permease/ATP-binding protein MdlB	bi
1	592	43	fig|6666666.904161.peg.592	hypothetical protein	bi
1	593	343	fig|6666666.904161.peg.593	hypothetical protein	bi
1	594	289	fig|6666666.904161.peg.594	hypothetical protein	bi
1	595	391	fig|6666666.904161.peg.595	Aspartate aminotransferase (EC 2.6.1.1)	bi
1	596	198	fig|6666666.904161.peg.596	hypothetical protein	bi
1	597	392	fig|6666666.904161.peg.597	Transposase	-
1	598	73	fig|6666666.904161.peg.598	hypothetical protein	-
1	599	144	fig|6666666.904161.peg.599	Mobile element protein	-
1	600	118	fig|6666666.904161.peg.600	hypothetical protein	bi
1	601	228	fig|6666666.904161.peg.601	Putative FMN hydrolase (EC 3.1.3.-); 5-Amino-6-(5'-phosphoribitylamino)uracil phosphatase	bi
1	602	190	fig|6666666.904161.peg.602	COG0110: Acetyltransferase (isoleucine patch superfamily)	bi
1	603	148	fig|6666666.904161.peg.603	Universal stress protein family	bi
1	604	74	fig|6666666.904161.peg.604	Programmed cell death antitoxin MazE	bi
1	605	284	fig|6666666.904161.peg.605	Short-chain dehydrogenase/oxidoreductase	bi
1	606	347	fig|6666666.904161.peg.606	Alcohol dehydrogenase (EC 1.1.1.1)	bi
1	607	199	fig|6666666.904161.peg.607	hypothetical protein	bi
1	608	293	fig|6666666.904161.peg.608	Predicted transcriptional regulators	bi
1	609	124	fig|6666666.904161.peg.609	FIG00750815: hypothetical protein	bi
1	610	213	fig|6666666.904161.peg.610	Phosphoglycerate mutase (Putative) (EC 5.4.2.1)	bi
1	611	102	fig|6666666.904161.peg.611	hypothetical protein	bi
1	612	84	fig|6666666.904161.peg.612	integral membrane protein (putative)	bi
1	613	166	fig|6666666.904161.peg.613	acetyltransferase (putative)	bi
1	614	156	fig|6666666.904161.peg.614	hypothetical protein	bi
1	615	79	fig|6666666.904161.peg.615	hypothetical protein	-
1	616	206	fig|6666666.904161.peg.616	Signal peptidase I (EC 3.4.21.89)	bi
1	617	207	fig|6666666.904161.peg.617	Galactoside O-acetyltransferase (EC 2.3.1.18)	bi
1	618	217	fig|6666666.904161.peg.618	Endonuclease III (EC 4.2.99.18)	bi
1	619	51	fig|6666666.904161.peg.619	hypothetical protein	bi
1	620	234	fig|6666666.904161.peg.620	ABC transporter, ATP-binding protein	bi
1	621	864	fig|6666666.904161.peg.621	hypothetical protein	bi
1	622	421	fig|6666666.904161.peg.622	Uncharacterized deacetylase	bi
1	623	145	fig|6666666.904161.peg.623	Transcriptional regulator	bi
1	624	133	fig|6666666.904161.peg.624	Transcriptional regulator	bi
1	625	107	fig|6666666.904161.peg.625	4-carboxymuconolactone decarboxylase (EC 4.1.1.44)	bi
1	626	248	fig|6666666.904161.peg.626	Oxidoreductase, short-chain dehydrogenase/reductase family	bi
1	627	406	fig|6666666.904161.peg.627	ABC transporter membrane-spanning permease - Na+ export	bi
1	628	300	fig|6666666.904161.peg.628	Efflux ABC transporter, ATP-binding protein	bi
1	629	67	fig|6666666.904161.peg.629	FIG00752350: hypothetical protein	uni
1	630	167	fig|6666666.904161.peg.630	Methylated-DNA--protein-cysteine methyltransferase (EC 2.1.1.63)	bi
1	631	353	fig|6666666.904161.peg.631	Aggregation promoting factor	bi
1	632	314	fig|6666666.904161.peg.632	Aggregation promoting factor	bi
1	633	515	fig|6666666.904161.peg.633	hypothetical protein	bi
1	634	503	fig|6666666.904161.peg.634	hypothetical protein	bi
1	635	276	fig|6666666.904161.peg.635	LysR family transcriptional regulator YeiE	bi
1	636	337	fig|6666666.904161.peg.636	Putative membrane protein YeiH	bi
1	637	186	fig|6666666.904161.peg.637	hypothetical protein	bi
1	638	167	fig|6666666.904161.peg.638	hypothetical protein	bi
1	639	495	fig|6666666.904161.peg.639	Uncharacterized MFS-type transporter	bi
1	640	221	fig|6666666.904161.peg.640	HAD superfamily hydrolase	bi
1	641	396	fig|6666666.904161.peg.641	Uncharacterized MFS-type transporter	bi
1	642	42	fig|6666666.904161.peg.642	hypothetical protein	bi
1	643	467	fig|6666666.904161.peg.643	Aspartate ammonia-lyase (EC 4.3.1.1)	bi
1	644	309	fig|6666666.904161.peg.644	Auxin efflux carrier family protein	bi
1	645	226	fig|6666666.904161.peg.645	sugar specific permease (putative)	bi
1	646	389	fig|6666666.904161.peg.646	Na+/H+ antiporter NapA	bi
1	647	180	fig|6666666.904161.peg.647	Dihydrofolate reductase (EC 1.5.1.3)	bi
1	648	327	fig|6666666.904161.peg.648	preQ1-regulated inosine-uridine nucleoside hydrolase (EC 3.2.2.1)	bi
1	649	184	fig|6666666.904161.peg.649	Substrate-specific component STY3230 of queuosine-regulated ECF transporter	bi
1	650	227	fig|6666666.904161.peg.650	ABC transporter, ATP-binding protein	bi
1	651	356	fig|6666666.904161.peg.651	ABC transporter, permease protein (putative)	bi
1	652	168	fig|6666666.904161.peg.652	hypothetical protein	bi
1	653	433	fig|6666666.904161.peg.653	Proton/glutamate symporter @ Sodium/glutamate symporter	bi
1	654	272	fig|6666666.904161.peg.654	Transcriptional regulator, MerR family	bi
1	655	226	fig|6666666.904161.peg.655	Uncharacterized DUF554 membrane protein	bi
1	656	58	fig|6666666.904161.peg.656	hypothetical protein	bi
1	657	168	fig|6666666.904161.peg.657	FIG00743012: hypothetical protein	bi
1	658	257	fig|6666666.904161.peg.658	hypothetical protein	bi
1	659	434	fig|6666666.904161.peg.659	Phage lysin, glycosyl hydrolase, family 25	bi
1	660	222	fig|6666666.904161.peg.660	FIG00751540: hypothetical protein	bi
1	661	419	fig|6666666.904161.peg.661	Tyrosyl-tRNA synthetase (EC 6.1.1.1)	bi
1	662	169	fig|6666666.904161.peg.662	hypothetical protein	bi
1	663	300	fig|6666666.904161.peg.663	Predicted transcriptional regulators	bi
1	664	288	fig|6666666.904161.peg.664	Oxidoreductase, aldo/keto reductase family	bi
1	665	289	fig|6666666.904161.peg.665	Oxidoreductase, aldo/keto reductase family	bi
1	666	152	fig|6666666.904161.peg.666	hypothetical protein	bi
1	667	479	fig|6666666.904161.peg.667	Inner membrane permease YcaM	bi
1	668	250	fig|6666666.904161.peg.668	hypothetical protein	bi
1	669	74	fig|6666666.904161.peg.669	FIG00752707: hypothetical protein	bi
1	670	617	fig|6666666.904161.peg.670	hypothetical protein	bi
1	671	378	fig|6666666.904161.peg.671	hypothetical protein	uni
1	672	1040	fig|6666666.904161.peg.672	hypothetical protein	bi
1	673	149	fig|6666666.904161.peg.673	Flavodoxin	bi
1	674	716	fig|6666666.904161.peg.674	hypothetical protein	bi
1	675	191	fig|6666666.904161.peg.675	oxidoreductase( EC:1.- )	bi
1	676	317	fig|6666666.904161.peg.676	D-3-phosphoglycerate dehydrogenase (EC 1.1.1.95)	bi
1	677	309	fig|6666666.904161.peg.677	Permease of the drug/metabolite transporter (DMT) superfamily	bi
1	678	340	fig|6666666.904161.peg.678	2-dehydropantoate 2-reductase (EC 1.1.1.169)	bi
1	679	278	fig|6666666.904161.peg.679	HMP-PP hydrolase (pyridoxal phosphatase) Cof, detected in genetic screen for thiamin metabolic genes (PMID:15292217)	bi
1	680	163	fig|6666666.904161.peg.680	FIG00742813: hypothetical protein	bi
1	681	225	fig|6666666.904161.peg.681	hypothetical protein	bi
1	682	245	fig|6666666.904161.peg.682	glycosyltransferase	bi
1	683	236	fig|6666666.904161.peg.683	hypothetical protein	bi
1	684	106	fig|6666666.904161.peg.684	PTS system, cellobiose-specific IIB component (EC 2.7.1.205)	bi
1	685	116	fig|6666666.904161.peg.685	PTS system, cellobiose-specific IIA component (EC 2.7.1.205)	bi
1	686	480	fig|6666666.904161.peg.686	6-phospho-beta-glucosidase (EC 3.2.1.86)	bi
1	687	481	fig|6666666.904161.peg.687	6-phospho-beta-glucosidase (EC 3.2.1.86)	bi
1	688	437	fig|6666666.904161.peg.688	D-serine ammonia-lyase (EC 4.3.1.18)	bi
1	689	248	fig|6666666.904161.peg.689	Efflux ABC transporter, ATP-binding protein	bi
1	690	400	fig|6666666.904161.peg.690	Efflux ABC transporter, permease protein	bi
1	691	224	fig|6666666.904161.peg.691	Transcriptional regulator, AcrR family	bi
1	692	478	fig|6666666.904161.peg.692	Nicotinate phosphoribosyltransferase (EC 6.3.4.21)	bi
1	693	170	fig|6666666.904161.peg.693	Transcriptional repressor for NAD biosynthesis in gram-positives	bi
1	694	394	fig|6666666.904161.peg.694	Acetyltransferase	bi
1	695	364	fig|6666666.904161.peg.695	Outer surface protein of unknown function, cellobiose operon	bi
1	696	74	fig|6666666.904161.peg.696	hypothetical protein	bi
1	697	249	fig|6666666.904161.peg.697	Oxidoreductase, short-chain dehydrogenase/reductase family	bi
1	698	123	fig|6666666.904161.peg.698	Diadenosine tetraphosphate (Ap4A) hydrolase and other HIT family hydrolases	bi
1	699	189	fig|6666666.904161.peg.699	ADP-ribose pyrophosphatase (EC 3.6.1.13)	bi
1	700	201	fig|6666666.904161.peg.700	Galactoside O-acetyltransferase (EC 2.3.1.18)	bi
1	701	212	fig|6666666.904161.peg.701	Uncharacterized low-complexity protein	bi
1	702	266	fig|6666666.904161.peg.702	Hydrolase, HAD superfamily	bi
1	703	498	fig|6666666.904161.peg.703	Threonine synthase (EC 4.2.3.1)	bi
1	704	575	fig|6666666.904161.peg.704	Neopullulanase (EC 3.2.1.135)	bi
1	705	33	fig|6666666.904161.peg.705	hypothetical protein	bi
1	706	106	fig|6666666.904161.peg.706	hypothetical protein	bi
1	707	213	fig|6666666.904161.peg.707	FIG00751124: hypothetical protein	bi
1	708	167	fig|6666666.904161.peg.708	FIG00743515: hypothetical protein	bi
1	709	399	fig|6666666.904161.peg.709	Aspartate aminotransferase (EC 2.6.1.1)	bi
1	710	61	fig|6666666.904161.peg.710	hypothetical protein	bi
1	711	109	fig|6666666.904161.peg.711	FIG00745266: hypothetical protein	bi
1	712	158	fig|6666666.904161.peg.712	hypothetical protein	bi
1	713	139	fig|6666666.904161.peg.713	FIG00744528: hypothetical protein	bi
1	714	79	fig|6666666.904161.peg.714	FIG00751618: hypothetical protein	bi
1	715	157	fig|6666666.904161.peg.715	Universal stress protein family	bi
1	716	270	fig|6666666.904161.peg.716	ABC transporter, permease protein	bi
1	717	293	fig|6666666.904161.peg.717	Efflux ABC transporter, ATP-binding protein	bi
1	718	124	fig|6666666.904161.peg.718	Transcriptional regulator, GntR family	bi
1	719	92	fig|6666666.904161.peg.719	integral membrane protein (putative)	bi
1	720	594	fig|6666666.904161.peg.720	ABC-type antimicrobial peptide transport system, permease component	bi
1	721	253	fig|6666666.904161.peg.721	ABC transporter-like sensor ATP-binding protein	bi
1	722	325	fig|6666666.904161.peg.722	L-asparaginase (EC 3.5.1.1)	bi
1	723	270	fig|6666666.904161.peg.723	cell surface hydrolase, membrane-bound (putative)	bi
1	724	212	fig|6666666.904161.peg.724	Carbonic anhydrase, alpha class (EC 4.2.1.1)	bi
1	725	264	fig|6666666.904161.peg.725	Protein tyrosine phosphatase (EC 3.1.3.48)	bi
1	726	337	fig|6666666.904161.peg.726	Lipoate-protein ligase A	bi
1	727	203	fig|6666666.904161.peg.727	FMN reductase-like protein EF_1226	bi
1	728	432	fig|6666666.904161.peg.728	FMN reductase-like protein EF_1227	bi
1	729	161	fig|6666666.904161.peg.729	N5-carboxyaminoimidazole ribonucleotide mutase (EC 5.4.99.18)	bi
1	730	377	fig|6666666.904161.peg.730	N5-carboxyaminoimidazole ribonucleotide synthase (EC 6.3.4.18)	bi
1	731	244	fig|6666666.904161.peg.731	Phosphoribosylaminoimidazole-succinocarboxamide synthase (EC 6.3.2.6)	bi
1	732	85	fig|6666666.904161.peg.732	Phosphoribosylformylglycinamidine synthase, PurS subunit (EC 6.3.5.3)	bi
1	733	227	fig|6666666.904161.peg.733	Phosphoribosylformylglycinamidine synthase, glutamine amidotransferase subunit (EC 6.3.5.3)	bi
1	734	740	fig|6666666.904161.peg.734	Phosphoribosylformylglycinamidine synthase, synthetase subunit (EC 6.3.5.3)	bi
1	735	485	fig|6666666.904161.peg.735	Amidophosphoribosyltransferase (EC 2.4.2.14)	bi
1	736	342	fig|6666666.904161.peg.736	Phosphoribosylformylglycinamidine cyclo-ligase (EC 6.3.3.1)	bi
1	737	193	fig|6666666.904161.peg.737	Phosphoribosylglycinamide formyltransferase (EC 2.1.2.2)	bi
1	738	511	fig|6666666.904161.peg.738	IMP cyclohydrolase (EC 3.5.4.10) / Phosphoribosylaminoimidazolecarboxamide formyltransferase (EC 2.1.2.3)	bi
1	739	414	fig|6666666.904161.peg.739	Phosphoribosylamine--glycine ligase (EC 6.3.4.13)	bi
1	740	223	fig|6666666.904161.peg.740	FIG00745869: hypothetical protein	bi
1	741	443	fig|6666666.904161.peg.741	Putative glycosyltransferase	bi
1	742	173	fig|6666666.904161.peg.742	hypothetical protein	bi
1	743	275	fig|6666666.904161.peg.743	protein containing diguanylate cyclase/phosphodiesterase domain 2 (EAL)	bi
1	744	301	fig|6666666.904161.peg.744	FIG00742424: hypothetical protein	bi
1	745	428	fig|6666666.904161.peg.745	Xanthine/uracil/thiamine/ascorbate permease family protein	bi
1	746	47	fig|6666666.904161.peg.746	hypothetical protein	bi
1	747	447	fig|6666666.904161.peg.747	Xanthine permease	bi
1	748	530	fig|6666666.904161.peg.748	purine transport regulator	bi
1	749	181	fig|6666666.904161.peg.749	Pyrimidine operon regulatory protein PyrR	bi
1	750	312	fig|6666666.904161.peg.750	Aspartate carbamoyltransferase (EC 2.1.3.2)	bi
1	751	431	fig|6666666.904161.peg.751	Dihydroorotase (EC 3.5.2.3)	bi
1	752	365	fig|6666666.904161.peg.752	Carbamoyl-phosphate synthase small chain (EC 6.3.5.5)	bi
1	753	1059	fig|6666666.904161.peg.753	Carbamoyl-phosphate synthase large chain (EC 6.3.5.5)	bi
1	754	306	fig|6666666.904161.peg.754	Dihydroorotate dehydrogenase (NAD(+)), catalytic subunit (EC 1.3.1.14)	bi
1	755	238	fig|6666666.904161.peg.755	Orotidine 5'-phosphate decarboxylase (EC 4.1.1.23)	bi
1	756	213	fig|6666666.904161.peg.756	Orotate phosphoribosyltransferase (EC 2.4.2.10)	bi
1	757	321	fig|6666666.904161.peg.757	Integral membrane protein	bi
1	758	1201	fig|6666666.904161.peg.758	ATP-dependent helicase/nuclease AddAB, subunit B	bi
1	759	1250	fig|6666666.904161.peg.759	ATP-dependent helicase/nuclease AddAB, subunit A	bi
1	760	175	fig|6666666.904161.peg.760	Histone acetyltransferase HPA2 and related acetyltransferases	bi
1	761	214	fig|6666666.904161.peg.761	oxidoreductase ylbE	bi
1	762	299	fig|6666666.904161.peg.762	hypothetical protein	bi
1	763	258	fig|6666666.904161.peg.763	Uncharacterized UPF0721 integral membrane protein	bi
1	764	45	fig|6666666.904161.peg.764	hypothetical protein	bi
1	765	290	fig|6666666.904161.peg.765	4-hydroxy-tetrahydrodipicolinate synthase (EC 4.3.3.7)	bi
1	766	391	fig|6666666.904161.peg.766	Aspartate aminotransferase (EC 2.6.1.1)	bi
1	767	455	fig|6666666.904161.peg.767	Transcriptional regulator, GntR family domain / Aspartate aminotransferase (EC 2.6.1.1)	bi
1	768	39	fig|6666666.904161.peg.768	hypothetical protein	bi
1	769	495	fig|6666666.904161.peg.769	Glucose-6-phosphate 1-dehydrogenase (EC 1.1.1.49)	bi
1	770	116	fig|6666666.904161.peg.770	hypothetical protein	bi
1	771	240	fig|6666666.904161.peg.771	Zinc-type alcohol dehydrogenase-like protein	uni
1	772	67	fig|6666666.904161.peg.772	Bifunctional protein: zinc-containing alcohol dehydrogenase; quinone oxidoreductase ( NADPH:quinone reductase) (EC 1.1.1.-); Similar to arginate lyase	bi
1	773	126	fig|6666666.904161.peg.773	Predicted transcriptional regulators	bi
1	774	388	fig|6666666.904161.peg.774	Uncharacterized MFS-type transporter	bi
1	775	531	fig|6666666.904161.peg.775	Na+/H+ antiporter	bi
1	776	162	fig|6666666.904161.peg.776	Ribonucleotide reduction protein NrdI	bi
1	777	456	fig|6666666.904161.peg.777	Hemolysins and related proteins containing CBS domains	bi
1	778	114	fig|6666666.904161.peg.778	FIG00751386: hypothetical protein	bi
1	779	140	fig|6666666.904161.peg.779	low molecular weight heat stress protein	bi
1	780	121	fig|6666666.904161.peg.780	FIG00745507: hypothetical protein	bi
1	781	175	fig|6666666.904161.peg.781	hypothetical protein	bi
1	782	250	fig|6666666.904161.peg.782	Accessory gene regulator A (response regulator)	bi
1	783	219	fig|6666666.904161.peg.783	HD domain protein	bi
1	784	260	fig|6666666.904161.peg.784	putative membrane protein	bi
1	785	168	fig|6666666.904161.peg.785	Cys-tRNA(Pro) deacylase YbaK	bi
1	786	242	fig|6666666.904161.peg.786	Transcriptional regulator, GntR family	bi
1	787	283	fig|6666666.904161.peg.787	acetylesterase	bi
1	788	789	fig|6666666.904161.peg.788	Xylulose-5-phosphate phosphoketolase (EC 4.1.2.9) @ Fructose-6-phosphate phosphoketolase (EC 4.1.2.22)	bi
1	789	392	fig|6666666.904161.peg.789	hypothetical protein	bi
1	790	66	fig|6666666.904161.peg.790	FIG00751916: hypothetical protein	bi
1	791	107	fig|6666666.904161.peg.791	hypothetical protein	bi
1	792	301	fig|6666666.904161.peg.792	Similar to ribosomal large subunit pseudouridine synthase D, Bacillus subtilis YhcT type	bi
1	793	154	fig|6666666.904161.peg.793	Universal stress protein family	bi
1	794	786	fig|6666666.904161.peg.794	hypothetical protein	bi
1	795	338	fig|6666666.904161.peg.795	Lipoate-protein ligase A	bi
1	796	127	fig|6666666.904161.peg.796	hypothetical protein	bi
1	797	150	fig|6666666.904161.peg.797	hypothetical protein	bi
1	798	39	fig|6666666.904161.peg.798	hypothetical protein	bi
1	799	169	fig|6666666.904161.peg.799	hypothetical protein	bi
1	800	221	fig|6666666.904161.peg.800	FIG00754199: hypothetical protein	bi
1	801	100	fig|6666666.904161.peg.801	hypothetical protein	bi
1	802	374	fig|6666666.904161.peg.802	Cystathionine gamma-synthase (EC 2.5.1.48)	bi
1	803	107	fig|6666666.904161.peg.803	FIG009688: Thioredoxin	bi
1	804	262	fig|6666666.904161.peg.804	FIG00751788: hypothetical protein	bi
1	805	62	fig|6666666.904161.peg.805	hypothetical protein	bi
1	806	586	fig|6666666.904161.peg.806	Pyruvate oxidase (EC 1.2.3.3)	bi
1	807	95	fig|6666666.904161.peg.807	acetyltransferase (putative)	bi
1	808	119	fig|6666666.904161.peg.808	FIG00746004: hypothetical protein	bi
1	809	284	fig|6666666.904161.peg.809	hypothetical protein	bi
1	810	139	fig|6666666.904161.peg.810	Transcriptional regulator, Xre family	bi
1	811	600	fig|6666666.904161.peg.811	Oligoendopeptidase F-like protein	bi
1	812	308	fig|6666666.904161.peg.812	hypothetical protein	bi
1	813	42	fig|6666666.904161.peg.813	hypothetical protein	uni
1	814	94	fig|6666666.904161.peg.814	hypothetical protein	bi
1	815	130	fig|6666666.904161.peg.815	Transcriptional regulator, GntR family	bi
1	816	237	fig|6666666.904161.peg.816	Efflux ABC transporter, ATP-binding protein	bi
1	817	258	fig|6666666.904161.peg.817	Uncharacterized ABC transporter, permease component	bi
1	818	185	fig|6666666.904161.peg.818	Nicotinamidase (EC 3.5.1.19)	bi
1	819	41	fig|6666666.904161.peg.819	hypothetical protein	bi
1	820	584	fig|6666666.904161.peg.820	1-deoxy-D-xylulose 5-phosphate synthase (EC 2.2.1.7)	bi
1	821	43	fig|6666666.904161.peg.821	hypothetical protein	bi
1	822	668	fig|6666666.904161.peg.822	Na+/H+ antiporter	bi
1	823	340	fig|6666666.904161.peg.823	Uncharacterized oxidoreductase YhhX	bi
1	824	38	fig|6666666.904161.peg.824	hypothetical protein	bi
1	825	326	fig|6666666.904161.peg.825	NAD-dependent oxidoreductase	bi
1	826	288	fig|6666666.904161.peg.826	Sialic acid utilization regulator, RpiR family	bi
1	827	313	fig|6666666.904161.peg.827	Transcriptional regulator, LacI family	bi
1	828	257	fig|6666666.904161.peg.828	Hydrolase (HAD superfamily) in cluster with DUF1447	bi
1	829	295	fig|6666666.904161.peg.829	Caulimovirus viroplasmin / Ribonuclease HI (EC 3.1.26.4)	bi
1	830	319	fig|6666666.904161.peg.830	Inosine-uridine preferring nucleoside hydrolase (EC 3.2.2.1)	bi
1	831	46	fig|6666666.904161.peg.831	nitroreductase family protein	uni
1	832	148	fig|6666666.904161.peg.832	nitroreductase family protein	bi
1	833	295	fig|6666666.904161.peg.833	hypothetical protein	bi
1	834	571	fig|6666666.904161.peg.834	Soluble lytic murein transglycosylase (EC 4.2.2.n1)	bi
1	835	254	fig|6666666.904161.peg.835	hypothetical protein	bi
1	836	332	fig|6666666.904161.peg.836	Thioredoxin reductase (EC 1.8.1.9)	bi
1	837	598	fig|6666666.904161.peg.837	membrane-anchoring domain / Glycerophosphoryl diester phosphodiesterase (EC 3.1.4.46)	bi
1	838	718	fig|6666666.904161.peg.838	Lipoteichoic acid synthase LtaS Type IIb	bi
1	839	146	fig|6666666.904161.peg.839	acetyltransferase (putative)	bi
1	840	448	fig|6666666.904161.peg.840	hypothetical protein	bi
1	841	221	fig|6666666.904161.peg.841	hypothetical protein	bi
1	842	42	fig|6666666.904161.peg.842	hypothetical protein	-
1	843	38	fig|6666666.904161.peg.843	hypothetical protein	bi
1	844	895	fig|6666666.904161.peg.844	hypothetical protein	bi
1	845	210	fig|6666666.904161.peg.845	Integral membrane protein	bi
1	846	73	fig|6666666.904161.peg.846	hypothetical protein	bi
1	847	318	fig|6666666.904161.peg.847	Choloylglycine hydrolase (EC 3.5.1.24)	bi
1	848	354	fig|6666666.904161.peg.848	Aspartate-semialdehyde dehydrogenase (EC 1.2.1.11)	bi
1	849	172	fig|6666666.904161.peg.849	hypothetical protein	-
1	850	275	fig|6666666.904161.peg.850	short-chain dehydrogenase/oxidoreductase	uni
1	851	170	fig|6666666.904161.peg.851	Transcriptional regulator	bi
1	852	116	fig|6666666.904161.peg.852	FIG00750094: hypothetical protein	bi
1	853	303	fig|6666666.904161.peg.853	Magnesium and cobalt transport protein CorA	bi
1	854	388	fig|6666666.904161.peg.854	hypothetical protein	bi
1	855	277	fig|6666666.904161.peg.855	Histidinol-phosphatase (EC 3.1.3.15)	bi
1	856	384	fig|6666666.904161.peg.856	ATP phosphoribosyltransferase regulatory subunit (EC 2.4.2.17)	bi
1	857	219	fig|6666666.904161.peg.857	ATP phosphoribosyltransferase (EC 2.4.2.17) => HisGs	bi
1	858	429	fig|6666666.904161.peg.858	Histidinol dehydrogenase (EC 1.1.1.23)	bi
1	859	195	fig|6666666.904161.peg.859	Imidazoleglycerol-phosphate dehydratase (EC 4.2.1.19)	bi
1	860	209	fig|6666666.904161.peg.860	Imidazole glycerol phosphate synthase amidotransferase subunit HisH	bi
1	861	240	fig|6666666.904161.peg.861	Phosphoribosylformimino-5-aminoimidazole carboxamide ribotide isomerase (EC 5.3.1.16)	bi
1	862	253	fig|6666666.904161.peg.862	Imidazole glycerol phosphate synthase cyclase subunit	bi
1	863	109	fig|6666666.904161.peg.863	Phosphoribosyl-AMP cyclohydrolase (EC 3.5.4.19)	bi
1	864	107	fig|6666666.904161.peg.864	Phosphoribosyl-ATP pyrophosphatase (EC 3.6.1.31)	bi
1	865	357	fig|6666666.904161.peg.865	Histidinol-phosphate aminotransferase (EC 2.6.1.9)	bi
1	866	185	fig|6666666.904161.peg.866	Acetyltransferase	bi
1	867	258	fig|6666666.904161.peg.867	Uncharacterized membrane protein YceF	bi
1	868	287	fig|6666666.904161.peg.868	2-hydroxy-3-oxopropionate reductase (EC 1.1.1.60)	bi
1	869	46	fig|6666666.904161.peg.869	hypothetical protein	bi
1	870	452	fig|6666666.904161.peg.870	NADH peroxidase Npx (EC 1.11.1.1)	bi
1	871	261	fig|6666666.904161.peg.871	ABC transporter, ATP-binding protein (cluster 15, trp?)	bi
1	872	303	fig|6666666.904161.peg.872	ABC transporter, permease protein (cluster 15, trp?)	bi
1	873	336	fig|6666666.904161.peg.873	ABC transporter, substrate-binding protein (cluster 15, trp?)	bi
1	874	45	fig|6666666.904161.peg.874	hypothetical protein	bi
1	875	292	fig|6666666.904161.peg.875	Homoserine O-succinyltransferase (EC 2.3.1.46)	bi
1	876	429	fig|6666666.904161.peg.876	O-acetylhomoserine sulfhydrylase (EC 2.5.1.49) @ O-succinylhomoserine sulfhydrylase (EC 2.5.1.48)	bi
1	877	412	fig|6666666.904161.peg.877	Homoserine dehydrogenase (EC 1.1.1.3)	bi
1	878	299	fig|6666666.904161.peg.878	DegV family protein	bi
1	879	325	fig|6666666.904161.peg.879	2-dehydropantoate 2-reductase (EC 1.1.1.169)	bi
1	880	663	fig|6666666.904161.peg.880	PTS system, N-acetylglucosamine-specific IIC component / PTS system, N-acetylglucosamine-specific IIB component (EC 2.7.1.193)	bi
1	881	114	fig|6666666.904161.peg.881	hypothetical protein	bi
1	882	150	fig|6666666.904161.peg.882	biphenyl-2,3-diol 1,2-dioxygenase III-related protein	bi
1	883	196	fig|6666666.904161.peg.883	Acetyltransferase (GNAT family) SAS0976	bi
1	884	518	fig|6666666.904161.peg.884	Bis-ABC ATPase SPy1206	bi
1	885	124	fig|6666666.904161.peg.885	Mobile element protein	-
1	886	144	fig|6666666.904161.peg.886	Mobile element protein	-
1	887	397	fig|6666666.904161.peg.887	hypothetical protein	bi
1	888	77	fig|6666666.904161.peg.888	hypothetical protein	bi
1	889	74	fig|6666666.904161.peg.889	FIG00754301: hypothetical protein	bi
1	890	155	fig|6666666.904161.peg.890	Transcriptional regulator, AsnC family	bi
1	891	298	fig|6666666.904161.peg.891	extracellular protein, gamma-D-glutamate-meso-diaminopimelate muropeptidase (putative)	bi
1	892	288	fig|6666666.904161.peg.892	hypothetical protein	bi
1	893	40	fig|6666666.904161.peg.893	hypothetical protein	bi
1	894	37	fig|6666666.904161.peg.894	hypothetical protein	bi
1	895	55	fig|6666666.904161.peg.895	hypothetical protein	bi
1	896	248	fig|6666666.904161.peg.896	hypothetical protein	bi
1	897	396	fig|6666666.904161.peg.897	Niacin transporter NiaP	bi
1	898	106	fig|6666666.904161.peg.898	hypothetical protein	bi
1	899	187	fig|6666666.904161.peg.899	Substrate-specific component PdxU of predicted pyridoxine ECF transporter	bi
1	900	46	fig|6666666.904161.peg.900	hypothetical protein	bi
1	901	296	fig|6666666.904161.peg.901	Putative transposase InsK for insertion sequence element IS150	uni
1	902	177	fig|6666666.904161.peg.902	Transposase	uni
1	903	313	fig|6666666.904161.peg.903	Permease of the drug/metabolite transporter (DMT) superfamily	bi
1	904	90	fig|6666666.904161.peg.904	ACT domain protein CAC_0478	bi
1	905	448	fig|6666666.904161.peg.905	FIG00519347: Ribonucleotide reductase-like protein	bi
1	906	243	fig|6666666.904161.peg.906	Uncharacterized transcriptional response regulator YclJ	bi
1	907	508	fig|6666666.904161.peg.907	Sensor histidine kinase YclK	bi
1	908	394	fig|6666666.904161.peg.908	hypothetical protein	bi
1	909	286	fig|6666666.904161.peg.909	Glucose:proton symporter GlcU	bi
1	910	310	fig|6666666.904161.peg.910	Mobile element protein	uni
1	911	451	fig|6666666.904161.peg.911	Glucose-6-phosphate isomerase (EC 5.3.1.9)	bi
1	912	64	fig|6666666.904161.peg.912	hypothetical protein	bi
1	913	665	fig|6666666.904161.peg.913	Macrolide export ATP-binding/permease protein	bi
1	914	404	fig|6666666.904161.peg.914	Poly(glycerol-phosphate) alpha-glucosyltransferase (EC 2.4.1.52)	bi
1	915	118	fig|6666666.904161.peg.915	Poly(glycerol-phosphate) alpha-glucosyltransferase (EC 2.4.1.52)	uni
1	916	588	fig|6666666.904161.peg.916	FIG00749522: hypothetical protein	bi
1	917	44	fig|6666666.904161.peg.917	hypothetical protein	bi
1	918	48	fig|6666666.904161.peg.918	hypothetical protein	bi
1	919	44	fig|6666666.904161.peg.919	hypothetical protein	bi
1	920	44	fig|6666666.904161.peg.920	hypothetical protein	uni
1	921	44	fig|6666666.904161.peg.921	hypothetical protein	bi
1	922	1047	fig|6666666.904161.peg.922	hypothetical protein	bi
1	923	659	fig|6666666.904161.peg.923	hypothetical protein	bi
1	924	162	fig|6666666.904161.peg.924	Transcriptional regulator	bi
1	925	91	fig|6666666.904161.peg.925	FIG00746198: hypothetical protein	bi
1	926	77	fig|6666666.904161.peg.926	hypothetical protein	bi
1	927	386	fig|6666666.904161.peg.927	hypothetical protein	bi
1	928	215	fig|6666666.904161.peg.928	hypothetical protein	-
1	929	60	fig|6666666.904161.peg.929	hypothetical protein	-
1	930	48	fig|6666666.904161.peg.930	hypothetical protein	bi
1	931	73	fig|6666666.904161.peg.931	hypothetical protein	bi
1	932	267	fig|6666666.904161.peg.932	prophage Lp4 protein 7, DNA replication	bi
1	933	465	fig|6666666.904161.peg.933	hypothetical protein	bi
1	934	140	fig|6666666.904161.peg.934	hypothetical protein	bi
1	935	95	fig|6666666.904161.peg.935	hypothetical protein	bi
1	936	115	fig|6666666.904161.peg.936	hypothetical protein	bi
1	937	130	fig|6666666.904161.peg.937	hypothetical protein	bi
1	938	49	fig|6666666.904161.peg.938	hypothetical protein	-
1	939	158	fig|6666666.904161.peg.939	Phage terminase small subunit	bi
1	940	568	fig|6666666.904161.peg.940	hypothetical protein	bi
1	941	367	fig|6666666.904161.peg.941	Phage portal protein	bi
1	942	509	fig|6666666.904161.peg.942	hypothetical protein	bi
1	943	90	fig|6666666.904161.peg.943	prophage Lp3 protein 19, head-to-tail joining	bi
1	944	127	fig|6666666.904161.peg.944	prophage Lp3 protein 20	bi
1	945	102	fig|6666666.904161.peg.945	hypothetical protein	-
1	946	69	fig|6666666.904161.peg.946	prophage Lp3 protein 24	bi
1	947	374	fig|6666666.904161.peg.947	hypothetical protein	bi
1	948	59	fig|6666666.904161.peg.948	hypothetical protein	bi
1	949	240	fig|6666666.904161.peg.949	hypothetical protein	bi
1	950	237	fig|6666666.904161.peg.950	hypothetical protein	-
1	951	138	fig|6666666.904161.peg.951	hypothetical protein	bi
1	952	61	fig|6666666.904161.peg.952	prophage Lp1 protein 8	bi
1	953	65	fig|6666666.904161.peg.953	hypothetical protein	-
1	954	57	fig|6666666.904161.peg.954	hypothetical protein	bi
1	955	102	fig|6666666.904161.peg.955	hypothetical protein	bi
1	956	171	fig|6666666.904161.peg.956	hypothetical protein	bi
1	957	43	fig|6666666.904161.peg.957	FIG00754769: hypothetical protein	bi
1	958	38	fig|6666666.904161.peg.958	hypothetical protein	-
1	959	177	fig|6666666.904161.peg.959	hypothetical protein	-
1	960	322	fig|6666666.904161.peg.960	hypothetical protein	-
1	961	311	fig|6666666.904161.peg.961	hypothetical protein	bi
1	962	96	fig|6666666.904161.peg.962	hypothetical protein	bi
1	963	173	fig|6666666.904161.peg.963	prophage Lp1 protein 23	bi
1	964	127	fig|6666666.904161.peg.964	prophage Lp2 protein 24	bi
1	965	66	fig|6666666.904161.peg.965	hypothetical protein	-
1	966	139	fig|6666666.904161.peg.966	hypothetical protein	-
1	967	156	fig|6666666.904161.peg.967	hypothetical protein	bi
1	968	182	fig|6666666.904161.peg.968	hypothetical protein	-
1	969	353	fig|6666666.904161.peg.969	hypothetical protein	-
1	970	122	fig|6666666.904161.peg.970	hypothetical protein	-
1	971	67	fig|6666666.904161.peg.971	hypothetical protein	bi
1	972	100	fig|6666666.904161.peg.972	hypothetical protein	-
1	973	170	fig|6666666.904161.peg.973	Phage terminase, small subunit	bi
1	974	433	fig|6666666.904161.peg.974	Phage terminase, large subunit	-
1	975	556	fig|6666666.904161.peg.975	hypothetical protein	bi
1	976	315	fig|6666666.904161.peg.976	hypothetical protein	-
1	977	216	fig|6666666.904161.peg.977	Phage capsid and scaffold	-
1	978	351	fig|6666666.904161.peg.978	prophage Lp2 protein 40	-
1	979	122	fig|6666666.904161.peg.979	prophage Lp1 protein 43	-
1	980	108	fig|6666666.904161.peg.980	prophage Lp2 protein 42	-
1	981	185	fig|6666666.904161.peg.981	prophage Lp1 protein 45	-
1	982	129	fig|6666666.904161.peg.982	prophage Lp1 protein 46	-
1	983	187	fig|6666666.904161.peg.983	prophage Lp1 protein 47	-
1	984	163	fig|6666666.904161.peg.984	prophage Lp1 protein 48	-
1	985	79	fig|6666666.904161.peg.985	hypothetical protein	-
1	986	1438	fig|6666666.904161.peg.986	hypothetical protein	bi
1	987	244	fig|6666666.904161.peg.987	prophage Lp1 protein 51	-
1	988	621	fig|6666666.904161.peg.988	hypothetical protein	uni
1	989	331	fig|6666666.904161.peg.989	hypothetical protein	-
1	990	205	fig|6666666.904161.peg.990	prophage Lp1 protein 54	-
1	991	246	fig|6666666.904161.peg.991	hypothetical protein	-
1	992	121	fig|6666666.904161.peg.992	hypothetical protein	-
1	993	43	fig|6666666.904161.peg.993	hypothetical protein	-
1	994	495	fig|6666666.904161.peg.994	hypothetical protein	bi
1	995	120	fig|6666666.904161.peg.995	hypothetical protein	-
1	996	58	fig|6666666.904161.peg.996	hypothetical protein	-
1	997	402	fig|6666666.904161.peg.997	Lysin	bi
1	998	88	fig|6666666.904161.peg.998	FIG00906256: hypothetical protein	bi
1	999	129	fig|6666666.904161.peg.999	prophage Lp2 protein 58	bi
1	1000	337	fig|6666666.904161.peg.1000	hypothetical protein	-
1	1001	53	fig|6666666.904161.peg.1001	hypothetical protein	bi
1	1002	282	fig|6666666.904161.peg.1002	Polysaccharide deacetylase, Carbohydrate Esterase Family 4	bi
1	1003	131	fig|6666666.904161.peg.1003	FIG00753207: hypothetical protein	bi
1	1004	577	fig|6666666.904161.peg.1004	Efflux ABC transporter, permease/ATP-binding protein EF2593	bi
1	1005	630	fig|6666666.904161.peg.1005	Efflux ABC transporter, permease/ATP-binding protein EF2592	bi
1	1006	324	fig|6666666.904161.peg.1006	hypothetical protein	bi
1	1007	110	fig|6666666.904161.peg.1007	FIG00742955: hypothetical protein	bi
1	1008	343	fig|6666666.904161.peg.1008	Branched-chain amino acid aminotransferase (EC 2.6.1.42)	bi
1	1009	62	fig|6666666.904161.peg.1009	hypothetical protein	bi
1	1010	340	fig|6666666.904161.peg.1010	Beta-lactamase class C-like and penicillin binding proteins (PBPs) superfamily	bi
1	1011	322	fig|6666666.904161.peg.1011	Mannose-6-phosphate isomerase (EC 5.3.1.8)	bi
1	1012	241	fig|6666666.904161.peg.1012	Putative amidotransferase similar to cobyric acid synthase	bi
1	1013	449	fig|6666666.904161.peg.1013	proposed amino acid ligase found clustered with an amidotransferase	bi
1	1014	193	fig|6666666.904161.peg.1014	Thymidine kinase (EC 2.7.1.21)	bi
1	1015	361	fig|6666666.904161.peg.1015	Peptide chain release factor 1	bi
1	1016	289	fig|6666666.904161.peg.1016	Peptide chain release factor N(5)-glutamine methyltransferase (EC 2.1.1.297)	bi
1	1017	340	fig|6666666.904161.peg.1017	Threonylcarbamoyl-AMP synthase (EC 2.7.7.87) / SUA5 domain with internal deletion	bi
1	1018	413	fig|6666666.904161.peg.1018	Serine hydroxymethyltransferase (EC 2.1.2.1)	bi
1	1019	210	fig|6666666.904161.peg.1019	Uracil phosphoribosyltransferase (EC 2.4.2.9)	bi
1	1020	41	fig|6666666.904161.peg.1020	hypothetical protein	bi
1	1021	58	fig|6666666.904161.peg.1021	FIG00752350: hypothetical protein	bi
1	1022	392	fig|6666666.904161.peg.1022	Transposase	-
1	1023	427	fig|6666666.904161.peg.1023	Uracil permease @ Uracil:proton symporter UraA	bi
1	1024	238	fig|6666666.904161.peg.1024	ATP synthase F0 sector subunit a (EC 3.6.3.14)	bi
1	1025	71	fig|6666666.904161.peg.1025	ATP synthase F0 sector subunit c (EC 3.6.3.14)	bi
1	1026	172	fig|6666666.904161.peg.1026	ATP synthase F0 sector subunit b (EC 3.6.3.14)	bi
1	1027	182	fig|6666666.904161.peg.1027	ATP synthase delta chain (EC 3.6.3.14)	bi
1	1028	507	fig|6666666.904161.peg.1028	ATP synthase alpha chain (EC 3.6.3.14)	bi
1	1029	315	fig|6666666.904161.peg.1029	ATP synthase gamma chain (EC 3.6.3.14)	bi
1	1030	468	fig|6666666.904161.peg.1030	ATP synthase beta chain (EC 3.6.3.14)	bi
1	1031	143	fig|6666666.904161.peg.1031	ATP synthase epsilon chain (EC 3.6.3.14)	bi
1	1032	439	fig|6666666.904161.peg.1032	UDP-N-acetylglucosamine 1-carboxyvinyltransferase (EC 2.5.1.7)	bi
1	1033	185	fig|6666666.904161.peg.1033	Ribosomal-protein-L7p-serine acetyltransferase	bi
1	1034	334	fig|6666666.904161.peg.1034	Rod shape-determining protein MreB	bi
1	1035	86	fig|6666666.904161.peg.1035	Membrane protein insertion efficiency factor YidD	bi
1	1036	76	fig|6666666.904161.peg.1036	FIG00742815: hypothetical protein	bi
1	1037	402	fig|6666666.904161.peg.1037	Rod shape-determining protein RodA	bi
1	1038	99	fig|6666666.904161.peg.1038	glycine cleavage system, H protein	bi
1	1039	344	fig|6666666.904161.peg.1039	Methionine ABC transporter ATP-binding protein	bi
1	1040	231	fig|6666666.904161.peg.1040	Methionine ABC transporter permease protein	bi
1	1041	275	fig|6666666.904161.peg.1041	Methionine ABC transporter substrate-binding protein	bi
1	1042	306	fig|6666666.904161.peg.1042	L-lactate dehydrogenase (EC 1.1.1.27)	bi
1	1043	325	fig|6666666.904161.peg.1043	hypothetical protein	bi
1	1044	343	fig|6666666.904161.peg.1044	Zinc-type alcohol dehydrogenase-like protein	bi
1	1045	371	fig|6666666.904161.peg.1045	D-alanine--D-alanine ligase (EC 6.3.2.4)	bi
1	1046	520	fig|6666666.904161.peg.1046	hypothetical protein	bi
1	1047	292	fig|6666666.904161.peg.1047	Transcriptional regulator, xre family	bi
1	1048	377	fig|6666666.904161.peg.1048	Beta-lactamase (EC 3.5.2.6)	bi
1	1049	161	fig|6666666.904161.peg.1049	Universal stress protein family	bi
1	1050	95	fig|6666666.904161.peg.1050	FIG00742610: hypothetical protein	bi
1	1051	427	fig|6666666.904161.peg.1051	Replication-associated recombination protein RarA	bi
1	1052	752	fig|6666666.904161.peg.1052	hypothetical protein	bi
1	1053	93	fig|6666666.904161.peg.1053	Transcriptional regulator, ArsR family	bi
1	1054	156	fig|6666666.904161.peg.1054	hypothetical protein	bi
1	1055	47	fig|6666666.904161.peg.1055	hypothetical protein	uni
1	1056	155	fig|6666666.904161.peg.1056	FIG00743012: hypothetical protein	bi
1	1057	209	fig|6666666.904161.peg.1057	DUF1054 superfamily protein	bi
1	1058	203	fig|6666666.904161.peg.1058	SSU ribosomal protein S4p (S9e) @ SSU ribosomal protein S4p (S9e), zinc-independent	bi
1	1059	154	fig|6666666.904161.peg.1059	Free methionine-(R)-sulfoxide reductase, contains GAF domain	bi
1	1060	574	fig|6666666.904161.peg.1060	Septation ring formation regulator EzrA	bi
1	1061	44	fig|6666666.904161.peg.1061	hypothetical protein	-
1	1062	385	fig|6666666.904161.peg.1062	Cysteine desulfurase (EC 2.8.1.7), associated with tRNA 4-thiouridine synthase	bi
1	1063	406	fig|6666666.904161.peg.1063	tRNA 4-thiouridine synthase (EC 2.8.1.4)	bi
1	1064	413	fig|6666666.904161.peg.1064	Glutathione biosynthesis bifunctional protein gshF (EC 6.3.2.2)(EC 6.3.2.3)	bi
1	1065	203	fig|6666666.904161.peg.1065	Thiol peroxidase, Tpx-type (EC 1.11.1.15)	bi
1	1066	890	fig|6666666.904161.peg.1066	Valyl-tRNA synthetase (EC 6.1.1.9)	bi
1	1067	445	fig|6666666.904161.peg.1067	Dihydrofolate synthase (EC 6.3.2.12) @ Folylpolyglutamate synthase (EC 6.3.2.17)	bi
1	1068	212	fig|6666666.904161.peg.1068	UPF0758 family protein	bi
1	1069	335	fig|6666666.904161.peg.1069	Rod shape-determining protein MreB	bi
1	1070	282	fig|6666666.904161.peg.1070	Rod shape-determining protein MreC	bi
1	1071	173	fig|6666666.904161.peg.1071	Rod shape-determining protein MreD	bi
1	1072	223	fig|6666666.904161.peg.1072	hypothetical protein	bi
1	1073	269	fig|6666666.904161.peg.1073	Septum site-determining protein MinD	bi
1	1074	214	fig|6666666.904161.peg.1074	ABC transporter, permease protein (cluster 3, basic aa/glutamine/opines)	bi
1	1075	214	fig|6666666.904161.peg.1075	ABC transporter, ATP-binding protein (cluster 3, basic aa/glutamine/opines)	bi
1	1076	280	fig|6666666.904161.peg.1076	ABC transporter, substrate-binding protein (cluster 3, basic aa/glutamine/opines)	bi
1	1077	451	fig|6666666.904161.peg.1077	Aspartokinase (EC 2.7.2.4)	bi
1	1078	42	fig|6666666.904161.peg.1078	hypothetical protein	bi
1	1079	422	fig|6666666.904161.peg.1079	FIG001621: Zinc protease	bi
1	1080	434	fig|6666666.904161.peg.1080	Uncharacterized zinc protease YmfH	bi
1	1081	291	fig|6666666.904161.peg.1081	hypothetical protein	bi
1	1082	195	fig|6666666.904161.peg.1082	CDP-diacylglycerol--glycerol-3-phosphate 3-phosphatidyltransferase (EC 2.7.8.5)	bi
1	1083	421	fig|6666666.904161.peg.1083	ADP-ribose pyrophosphatase of COG1058 family (EC 3.6.1.13) / Nicotinamide-nucleotide amidase (EC 3.5.1.42)	bi
1	1084	381	fig|6666666.904161.peg.1084	RecA protein	bi
1	1085	520	fig|6666666.904161.peg.1085	Ribonuclease Y	bi
1	1086	269	fig|6666666.904161.peg.1086	2',3'-cyclic-nucleotide 2'-phosphodiesterase, Bsub YmdB	bi
1	1087	897	fig|6666666.904161.peg.1087	DNA mismatch repair protein MutS	bi
1	1088	679	fig|6666666.904161.peg.1088	DNA mismatch repair protein MutL	bi
1	1089	39	fig|6666666.904161.peg.1089	hypothetical protein	-
1	1090	578	fig|6666666.904161.peg.1090	Transposase, IS4 family	bi
1	1091	133	fig|6666666.904161.peg.1091	FIG00748966: hypothetical protein	bi
1	1092	1023	fig|6666666.904161.peg.1092	hypothetical protein	bi
1	1093	174	fig|6666666.904161.peg.1093	FIG00742804: hypothetical protein	bi
1	1094	38	fig|6666666.904161.peg.1094	hypothetical protein	bi
1	1095	204	fig|6666666.904161.peg.1095	Holliday junction ATP-dependent DNA helicase RuvA (EC 3.6.4.12)	bi
1	1096	337	fig|6666666.904161.peg.1096	Holliday junction ATP-dependent DNA helicase RuvB (EC 3.6.4.12)	bi
1	1097	345	fig|6666666.904161.peg.1097	S-adenosylmethionine:tRNA ribosyltransferase-isomerase (EC 2.4.99.17)	bi
1	1098	381	fig|6666666.904161.peg.1098	Queuine tRNA-ribosyltransferase (EC 2.4.2.29)	bi
1	1099	128	fig|6666666.904161.peg.1099	Protein translocase subunit YajC	bi
1	1100	378	fig|6666666.904161.peg.1100	DNA polymerase IV (EC 2.7.7.7)	bi
1	1101	319	fig|6666666.904161.peg.1101	3'-to-5' oligoribonuclease A, Bacillus type	bi
1	1102	448	fig|6666666.904161.peg.1102	DEAD-box ATP-dependent RNA helicase CshB (EC 3.6.4.13)	bi
1	1103	881	fig|6666666.904161.peg.1103	Alanyl-tRNA synthetase (EC 6.1.1.7)	bi
1	1104	90	fig|6666666.904161.peg.1104	UPF0297 protein YrzL	bi
1	1105	145	fig|6666666.904161.peg.1105	Putative pre-16S rRNA nuclease YqgF	bi
1	1106	99	fig|6666666.904161.peg.1106	UPF0473 protein YrzB	bi
1	1107	86	fig|6666666.904161.peg.1107	Glycerate kinase (EC 2.7.1.31)	bi
1	1108	788	fig|6666666.904161.peg.1108	Recombination inhibitory protein MutS2	bi
1	1109	104	fig|6666666.904161.peg.1109	Thioredoxin	bi
1	1110	228	fig|6666666.904161.peg.1110	FIG008111: hypothetical protein	bi
1	1111	274	fig|6666666.904161.peg.1111	Glutamate racemase (EC 5.1.1.3)	bi
1	1112	203	fig|6666666.904161.peg.1112	Nucleoside 5-triphosphatase RdgB (dHAPTP, dITP, XTP-specific) (EC 3.6.1.66)	bi
1	1113	173	fig|6666666.904161.peg.1113	FIG009886: phosphoesterase	bi
1	1114	164	fig|6666666.904161.peg.1114	CBS domain protein	bi
1	1115	237	fig|6666666.904161.peg.1115	2,3,4,5-tetrahydropyridine-2,6-dicarboxylate N-acetyltransferase (EC 2.3.1.89)	bi
1	1116	385	fig|6666666.904161.peg.1116	N-acetyl-L,L-diaminopimelate deacetylase (EC 3.5.1.47)	bi
1	1117	298	fig|6666666.904161.peg.1117	Potassium efflux system KefA protein / Small-conductance mechanosensitive channel	bi
1	1118	139	fig|6666666.904161.peg.1118	General stress protein	bi
1	1119	171	fig|6666666.904161.peg.1119	hypothetical protein	bi
1	1120	125	fig|6666666.904161.peg.1120	transcriptional regulator	bi
1	1121	370	fig|6666666.904161.peg.1121	Xaa-Pro dipeptidase (EC 3.4.13.9)	bi
1	1122	55	fig|6666666.904161.peg.1122	hypothetical protein	bi
1	1123	337	fig|6666666.904161.peg.1123	Catabolite control protein A	bi
1	1124	291	fig|6666666.904161.peg.1124	hypothetical protein	bi
1	1125	107	fig|6666666.904161.peg.1125	FIG00753157: hypothetical protein	bi
1	1126	243	fig|6666666.904161.peg.1126	Probable transcriptional regulatory protein YebC	bi
1	1127	307	fig|6666666.904161.peg.1127	Ribokinase (EC 2.7.1.15)	bi
1	1128	325	fig|6666666.904161.peg.1128	Late competence protein ComGA, access of DNA to ComEA	bi
1	1129	323	fig|6666666.904161.peg.1129	hypothetical protein	bi
1	1130	119	fig|6666666.904161.peg.1130	hypothetical protein	bi
1	1131	157	fig|6666666.904161.peg.1131	hypothetical protein	bi
1	1132	62	fig|6666666.904161.peg.1132	hypothetical protein	bi
1	1133	163	fig|6666666.904161.peg.1133	hypothetical protein	bi
1	1134	365	fig|6666666.904161.peg.1134	Adenine-specific methyltransferase (EC 2.1.1.72)	bi
1	1135	398	fig|6666666.904161.peg.1135	Acetate kinase (EC 2.7.2.1)	bi
1	1136	462	fig|6666666.904161.peg.1136	D-serine/D-alanine/glycine transporter	bi
1	1137	203	fig|6666666.904161.peg.1137	Phosphoesterase	bi
1	1138	464	fig|6666666.904161.peg.1138	5'-nucleotidase family protein in cluster with NagD-like phosphatase	bi
1	1139	210	fig|6666666.904161.peg.1139	Hypothetical DUF1027 domain protein	bi
1	1140	264	fig|6666666.904161.peg.1140	Hypothetical NagD-like phosphatase	bi
1	1141	214	fig|6666666.904161.peg.1141	Integral membrane protein	bi
1	1142	219	fig|6666666.904161.peg.1142	DedA protein	bi
1	1143	195	fig|6666666.904161.peg.1143	Peptidyl-prolyl cis-trans isomerase (EC 5.2.1.8)	bi
1	1144	136	fig|6666666.904161.peg.1144	General stress protein 13	bi
1	1145	177	fig|6666666.904161.peg.1145	Transposase	bi
1	1146	296	fig|6666666.904161.peg.1146	Putative transposase InsK for insertion sequence element IS150	bi
1	1147	125	fig|6666666.904161.peg.1147	FIG00745743: hypothetical protein	bi
1	1148	167	fig|6666666.904161.peg.1148	hypothetical protein	bi
1	1149	248	fig|6666666.904161.peg.1149	hypothetical protein	bi
1	1150	133	fig|6666666.904161.peg.1150	Regulatory protein Spx	bi
1	1151	244	fig|6666666.904161.peg.1151	ClpCP protease substrate adapter protein MecA	bi
1	1152	53	fig|6666666.904161.peg.1152	Competence protein CoiA	bi
1	1153	322	fig|6666666.904161.peg.1153	Competence protein CoiA	uni
1	1154	604	fig|6666666.904161.peg.1154	Oligoendopeptidase F	bi
1	1155	212	fig|6666666.904161.peg.1155	hypothetical protein	bi
1	1156	221	fig|6666666.904161.peg.1156	GTP pyrophosphokinase (EC 2.7.6.5)	bi
1	1157	268	fig|6666666.904161.peg.1157	NAD kinase (EC 2.7.1.23)	bi
1	1158	301	fig|6666666.904161.peg.1158	Similar to ribosomal large subunit pseudouridine synthase D, Bacillus subtilis YjbO type	bi
1	1159	213	fig|6666666.904161.peg.1159	Cytoplasmic copper homeostasis protein CutC	bi
1	1160	340	fig|6666666.904161.peg.1160	6-phosphogluconolactonase (EC 3.1.1.31)	bi
1	1161	120	fig|6666666.904161.peg.1161	hypothetical protein	bi
1	1162	385	fig|6666666.904161.peg.1162	UPF0118 membrane protein YubA	bi
1	1163	90	fig|6666666.904161.peg.1163	SSU ribosomal protein S14p (S29e) @ SSU ribosomal protein S14p (S29e), zinc-independent	bi
1	1164	285	fig|6666666.904161.peg.1164	23S rRNA (guanine(748)-N(1))-methyltransferase (EC 2.1.1.188)	bi
1	1165	450	fig|6666666.904161.peg.1165	Na(+)-dependent branched-chain amino acid transporter	bi
1	1166	216	fig|6666666.904161.peg.1166	Rrf2-linked NADH-flavin reductase	bi
1	1167	171	fig|6666666.904161.peg.1167	tRNA (cytidine(34)-2'-O)-methyltransferase (EC 2.1.1.207)	bi
1	1168	796	fig|6666666.904161.peg.1168	DNA translocase FtsK	bi
1	1169	177	fig|6666666.904161.peg.1169	Transposase	uni
1	1170	296	fig|6666666.904161.peg.1170	Putative transposase InsK for insertion sequence element IS150	uni
1	1171	40	fig|6666666.904161.peg.1171	hypothetical protein	bi
1	1172	320	fig|6666666.904161.peg.1172	Magnesium and cobalt transport protein CorA	bi
1	1173	123	fig|6666666.904161.peg.1173	FIG00744627: hypothetical protein	bi
1	1174	148	fig|6666666.904161.peg.1174	Transcriptional regulator MraZ	bi
1	1175	320	fig|6666666.904161.peg.1175	16S rRNA (cytosine(1402)-N(4))-methyltransferase (EC 2.1.1.199)	bi
1	1176	129	fig|6666666.904161.peg.1176	Cell division protein FtsL	bi
1	1177	714	fig|6666666.904161.peg.1177	Cell division protein FtsI [Peptidoglycan synthetase] (EC 2.4.1.129)	bi
1	1178	322	fig|6666666.904161.peg.1178	Phospho-N-acetylmuramoyl-pentapeptide-transferase (EC 2.7.8.13)	bi
1	1179	460	fig|6666666.904161.peg.1179	UDP-N-acetylmuramoyl-L-alanine--D-glutamate ligase (EC 6.3.2.9)	bi
1	1180	364	fig|6666666.904161.peg.1180	UDP-N-acetylglucosamine--N-acetylmuramyl-(pentapeptide) pyrophosphoryl-undecaprenol N-acetylglucosamine transferase (EC 2.4.1.227)	bi
1	1181	292	fig|6666666.904161.peg.1181	Cell division protein FtsQ	bi
1	1182	449	fig|6666666.904161.peg.1182	Cell division protein FtsA	bi
1	1183	428	fig|6666666.904161.peg.1183	Cell division protein FtsZ	bi
1	1184	141	fig|6666666.904161.peg.1184	SepF, FtsZ-interacting protein related to cell division	bi
1	1185	85	fig|6666666.904161.peg.1185	Cell division integral membrane protein, YggT and half-length relatives	bi
1	1186	262	fig|6666666.904161.peg.1186	Putative RNA-binding protein YlmH	bi
1	1187	233	fig|6666666.904161.peg.1187	Cell division initiation protein DivIVA	bi
1	1188	933	fig|6666666.904161.peg.1188	Isoleucyl-tRNA synthetase (EC 6.1.1.5)	bi
1	1189	333	fig|6666666.904161.peg.1189	Diaminopimelate epimerase (EC 5.1.1.7)	bi
1	1190	185	fig|6666666.904161.peg.1190	ADP-ribose pyrophosphatase (EC 3.6.1.13)	bi
1	1191	84	fig|6666666.904161.peg.1191	FIG01269953: hypothetical protein	bi
1	1192	231	fig|6666666.904161.peg.1192	5'-methylthioadenosine nucleosidase (EC 3.2.2.16) @ S-adenosylhomocysteine nucleosidase (EC 3.2.2.9)	bi
1	1193	395	fig|6666666.904161.peg.1193	Cysteine desulfurase (EC 2.8.1.7)	bi
1	1194	114	fig|6666666.904161.peg.1194	FIG00743560: hypothetical protein	bi
1	1195	378	fig|6666666.904161.peg.1195	tRNA-specific 2-thiouridylase MnmA (EC 2.8.1.13)	bi
1	1196	451	fig|6666666.904161.peg.1196	KtrAB potassium uptake system, integral membrane component KtrB	bi
1	1197	221	fig|6666666.904161.peg.1197	KtrAB potassium uptake system, peripheral membrane component KtrA	bi
1	1198	244	fig|6666666.904161.peg.1198	hypothetical protein	bi
1	1199	345	fig|6666666.904161.peg.1199	hypothetical protein	bi
1	1200	483	fig|6666666.904161.peg.1200	hypothetical protein	bi
1	1201	222	fig|6666666.904161.peg.1201	Phosphoglycerate mutase family 5	bi
1	1202	225	fig|6666666.904161.peg.1202	FIG00742458: hypothetical protein	bi
1	1203	850	fig|6666666.904161.peg.1203	RecD-like DNA helicase YrrC	bi
1	1204	322	fig|6666666.904161.peg.1204	Ribose-phosphate pyrophosphokinase (EC 2.7.6.1)	bi
1	1205	497	fig|6666666.904161.peg.1205	hypothetical protein	bi
1	1206	68	fig|6666666.904161.peg.1206	FIG00743162: hypothetical protein	bi
1	1207	320	fig|6666666.904161.peg.1207	Transcription regulator [contains diacylglycerol kinase catalytic domain]	bi
1	1208	559	fig|6666666.904161.peg.1208	Ribonuclease J1 (endonuclease and 5' exonuclease)	bi
1	1209	73	fig|6666666.904161.peg.1209	Protein of unknown function DUF1447	bi
1	1210	169	fig|6666666.904161.peg.1210	hypothetical protein	bi
1	1211	187	fig|6666666.904161.peg.1211	Peptide deformylase (EC 3.5.1.88)	bi
1	1212	371	fig|6666666.904161.peg.1212	Pyruvate dehydrogenase E1 component alpha subunit (EC 1.2.4.1)	bi
1	1213	326	fig|6666666.904161.peg.1213	Pyruvate dehydrogenase E1 component beta subunit (EC 1.2.4.1)	bi
1	1214	439	fig|6666666.904161.peg.1214	Dihydrolipoamide acetyltransferase component of pyruvate dehydrogenase complex (EC 2.3.1.12)	bi
1	1215	471	fig|6666666.904161.peg.1215	Dihydrolipoamide dehydrogenase of pyruvate dehydrogenase complex (EC 1.8.1.4)	bi
1	1216	311	fig|6666666.904161.peg.1216	L-lactate dehydrogenase (EC 1.1.1.27)	bi
1	1217	96	fig|6666666.904161.peg.1217	FIG006438: hypothetical protein	bi
1	1218	258	fig|6666666.904161.peg.1218	Inositol-1-monophosphatase (EC 3.1.3.25)	bi
1	1219	613	fig|6666666.904161.peg.1219	GTP-binding protein TypA/BipA	bi
1	1220	401	fig|6666666.904161.peg.1220	Extracellular protein	bi
1	1221	200	fig|6666666.904161.peg.1221	putative membrane protein	bi
1	1222	39	fig|6666666.904161.peg.1222	FIG00749737: hypothetical protein	-
1	1223	168	fig|6666666.904161.peg.1223	Mobile element protein	-
1	1224	367	fig|6666666.904161.peg.1224	Glycosyltransferase	bi
1	1225	529	fig|6666666.904161.peg.1225	Integral membrane protein	bi
1	1226	52	fig|6666666.904161.peg.1226	hypothetical protein	-
1	1227	389	fig|6666666.904161.peg.1227	FtsW-like protein YlaO	bi
1	1228	1144	fig|6666666.904161.peg.1228	Pyruvate carboxylase (EC 6.4.1.1)	bi
1	1229	101	fig|6666666.904161.peg.1229	hypothetical Cytosolic Protein	bi
1	1230	188	fig|6666666.904161.peg.1230	16S rRNA (guanine(966)-N(2))-methyltransferase (EC 2.1.1.171)	bi
1	1231	164	fig|6666666.904161.peg.1231	Phosphopantetheine adenylyltransferase (EC 2.7.7.3)	bi
1	1232	349	fig|6666666.904161.peg.1232	Lon-like protease with PDZ domain	bi
1	1233	242	fig|6666666.904161.peg.1233	Late competence protein ComEA, DNA receptor	bi
1	1234	162	fig|6666666.904161.peg.1234	dCMP deaminase (EC 3.5.4.12) @ Late competence protein ComEB	bi
1	1235	739	fig|6666666.904161.peg.1235	DNA internalization-related competence protein ComEC/Rec2	bi
1	1236	354	fig|6666666.904161.peg.1236	DNA polymerase III delta subunit (EC 2.7.7.7)	bi
1	1237	85	fig|6666666.904161.peg.1237	SSU ribosomal protein S20p	bi
1	1238	90	fig|6666666.904161.peg.1238	SSU ribosomal protein S15p (S13e)	bi
1	1239	237	fig|6666666.904161.peg.1239	Multidrug-efflux transporter, major facilitator superfamily (MFS)	bi
1	1240	291	fig|6666666.904161.peg.1240	4-hydroxy-tetrahydrodipicolinate synthase (EC 4.3.3.7)	bi
1	1241	575	fig|6666666.904161.peg.1241	Ribonuclease J2 (endoribonuclease in RNA processing)	bi
1	1242	305	fig|6666666.904161.peg.1242	FIG00742723: hypothetical protein	bi
1	1243	396	fig|6666666.904161.peg.1243	Translation elongation factor Tu	bi
1	1244	441	fig|6666666.904161.peg.1244	Cell division trigger factor (EC 5.2.1.8)	bi
1	1245	422	fig|6666666.904161.peg.1245	ATP-dependent Clp protease ATP-binding subunit ClpX	bi
1	1246	198	fig|6666666.904161.peg.1246	GTP-binding protein EngB	bi
1	1247	99	fig|6666666.904161.peg.1247	FIG00743467: hypothetical protein	bi
1	1248	136	fig|6666666.904161.peg.1248	hypothetical protein	bi
1	1249	57	fig|6666666.904161.peg.1249	hypothetical protein	bi
1	1250	492	fig|6666666.904161.peg.1250	ABC transporter, substrate-binding protein (cluster 3, basic aa/glutamine/opines) / ABC transporter, permease protein (cluster 3, basic aa/glutamine/opines)	bi
1	1251	247	fig|6666666.904161.peg.1251	ABC transporter, ATP-binding protein (cluster 3, basic aa/glutamine/opines)	bi
1	1252	605	fig|6666666.904161.peg.1252	Excinuclease ABC subunit C	bi
1	1253	253	fig|6666666.904161.peg.1253	hypothetical protein	bi
1	1254	236	fig|6666666.904161.peg.1254	Tyrosine-protein kinase (EC 2.7.10.2)	bi
1	1255	229	fig|6666666.904161.peg.1255	Manganese-dependent protein-tyrosine phosphatase (EC 3.1.3.48)	bi
1	1256	314	fig|6666666.904161.peg.1256	UDP-glucose 4-epimerase (EC 5.1.3.2)	bi
1	1257	222	fig|6666666.904161.peg.1257	Undecaprenyl-phosphate galactosephosphotransferase (EC 2.7.8.6)	bi
1	1258	323	fig|6666666.904161.peg.1258	Exopolysaccharide biosynthesis glycosyltransferase EpsF (EC 2.4.1.-)	bi
1	1259	343	fig|6666666.904161.peg.1259	glycosyltransferase	bi
1	1260	425	fig|6666666.904161.peg.1260	FIG00748679: hypothetical protein	bi
1	1261	323	fig|6666666.904161.peg.1261	hypothetical protein	bi
1	1262	484	fig|6666666.904161.peg.1262	hypothetical protein	bi
1	1263	441	fig|6666666.904161.peg.1263	Serine/threonine protein phosphatase family protein	bi
1	1264	656	fig|6666666.904161.peg.1264	PTS system, fructose-specific IIA component (EC 2.7.1.202) / PTS system, fructose-specific IIB component (EC 2.7.1.202) / PTS system, fructose-specific IIC component	bi
1	1265	306	fig|6666666.904161.peg.1265	1-phosphofructokinase (EC 2.7.1.56)	bi
1	1266	252	fig|6666666.904161.peg.1266	Transcriptional repressor of the fructose operon, DeoR family	bi
1	1267	432	fig|6666666.904161.peg.1267	GTP-binding protein Obg	bi
1	1268	95	fig|6666666.904161.peg.1268	FIG00747544: hypothetical protein	bi
1	1269	38	fig|6666666.904161.peg.1269	hypothetical protein	bi
1	1270	312	fig|6666666.904161.peg.1270	Ribonuclease Z (EC 3.1.26.11)	bi
1	1271	264	fig|6666666.904161.peg.1271	Short-chain dehydrogenase/reductase SDR	bi
1	1272	117	fig|6666666.904161.peg.1272	FIG00744981: hypothetical protein	bi
1	1273	779	fig|6666666.904161.peg.1273	Single-stranded-DNA-specific exonuclease RecJ	bi
1	1274	173	fig|6666666.904161.peg.1274	Adenine phosphoribosyltransferase (EC 2.4.2.7)	bi
1	1275	192	fig|6666666.904161.peg.1275	FIG00746873: hypothetical protein	bi
1	1276	404	fig|6666666.904161.peg.1276	putative membrane protein	bi
1	1277	116	fig|6666666.904161.peg.1277	UPF0145 protein	bi
1	1278	254	fig|6666666.904161.peg.1278	SAM-dependent methyltransferase	bi
1	1279	69	fig|6666666.904161.peg.1279	FIG00751218: hypothetical protein	bi
1	1280	404	fig|6666666.904161.peg.1280	Rod shape-determining protein RodA	bi
1	1281	581	fig|6666666.904161.peg.1281	ABC-type anion transport system, duplicated permease component	bi
1	1282	264	fig|6666666.904161.peg.1282	ABC-type nitrate/sulfonate/bicarbonate transport system, ATPase component	bi
1	1283	387	fig|6666666.904161.peg.1283	Transcriptional regulator	bi
1	1284	191	fig|6666666.904161.peg.1284	hypothetical protein	bi
1	1285	314	fig|6666666.904161.peg.1285	Bactoprenol glucosyl transferase (EC 2.4.1.-)	bi
1	1286	131	fig|6666666.904161.peg.1286	FIG00747133: hypothetical protein	bi
1	1287	131	fig|6666666.904161.peg.1287	hypothetical protein	bi
1	1288	390	fig|6666666.904161.peg.1288	Hydroxymethylglutaryl-CoA synthase (EC 2.3.3.10)	bi
1	1289	210	fig|6666666.904161.peg.1289	hypothetical protein	bi
1	1290	211	fig|6666666.904161.peg.1290	SOS-response repressor and protease LexA (EC 3.4.21.88)	bi
1	1291	91	fig|6666666.904161.peg.1291	hypothetical protein	bi
1	1292	77	fig|6666666.904161.peg.1292	FIG00742188: hypothetical protein	bi
1	1293	212	fig|6666666.904161.peg.1293	Acyl-ACP:1-acyl-sn-glycerol-3-phosphate acyltransferase (EC 2.3.1.n4)	bi
1	1294	253	fig|6666666.904161.peg.1294	tRNA(1)(Val) (adenine(37)-N(6))-methyltransferase (EC 2.1.1.223)	bi
1	1295	102	fig|6666666.904161.peg.1295	UPF0213 protein YazA	bi
1	1296	333	fig|6666666.904161.peg.1296	D-lactate dehydrogenase (EC 1.1.1.28)	bi
1	1297	241	fig|6666666.904161.peg.1297	Putative FMN hydrolase (EC 3.1.3.-); 5-Amino-6-(5'-phosphoribitylamino)uracil phosphatase	bi
1	1298	268	fig|6666666.904161.peg.1298	SSU ribosomal protein S2p (SAe)	bi
1	1299	293	fig|6666666.904161.peg.1299	Translation elongation factor Ts	bi
1	1300	241	fig|6666666.904161.peg.1300	Uridylate kinase (EC 2.7.4.22)	bi
1	1301	188	fig|6666666.904161.peg.1301	Ribosome recycling factor	bi
1	1302	260	fig|6666666.904161.peg.1302	Undecaprenyl diphosphate synthase (EC 2.5.1.31)	bi
1	1303	262	fig|6666666.904161.peg.1303	Phosphatidate cytidylyltransferase (EC 2.7.7.41)	bi
1	1304	426	fig|6666666.904161.peg.1304	Membrane-associated zinc metalloprotease	bi
1	1305	570	fig|6666666.904161.peg.1305	Prolyl-tRNA synthetase (EC 6.1.1.15), bacterial type	bi
1	1306	55	fig|6666666.904161.peg.1306	hypothetical protein	bi
1	1307	47	fig|6666666.904161.peg.1307	hypothetical protein	bi
1	1308	1438	fig|6666666.904161.peg.1308	DNA polymerase III polC-type (EC 2.7.7.7)	bi
1	1309	159	fig|6666666.904161.peg.1309	Bacterial ribosome SSU maturation protein RimP	bi
1	1310	406	fig|6666666.904161.peg.1310	Transcription termination protein NusA	bi
1	1311	100	fig|6666666.904161.peg.1311	COG2740: Predicted nucleic-acid-binding protein implicated in transcription termination	bi
1	1312	102	fig|6666666.904161.peg.1312	ribosomal protein L7Ae family protein	bi
1	1313	859	fig|6666666.904161.peg.1313	Translation initiation factor 2	bi
1	1314	118	fig|6666666.904161.peg.1314	Ribosome-binding factor A	bi
1	1315	485	fig|6666666.904161.peg.1315	Transport protein	bi
1	1316	390	fig|6666666.904161.peg.1316	Chorismate synthase (EC 4.2.3.5)	bi
1	1317	176	fig|6666666.904161.peg.1317	hypothetical protein	bi
1	1318	421	fig|6666666.904161.peg.1318	3-phosphoshikimate 1-carboxyvinyltransferase (EC 2.5.1.19)	bi
1	1319	366	fig|6666666.904161.peg.1319	Prephenate dehydrogenase (EC 1.3.1.12)	bi
1	1320	174	fig|6666666.904161.peg.1320	Shikimate kinase I (EC 2.7.1.71)	bi
1	1321	308	fig|6666666.904161.peg.1321	tRNA pseudouridine(55) synthase (EC 5.4.99.25)	bi
1	1322	334	fig|6666666.904161.peg.1322	FMN adenylyltransferase (EC 2.7.7.2) / Riboflavin kinase (EC 2.7.1.26)	bi
1	1323	237	fig|6666666.904161.peg.1323	Alpha-acetolactate decarboxylase (EC 4.1.1.5)	bi
1	1324	348	fig|6666666.904161.peg.1324	Heat-inducible transcription repressor HrcA	bi
1	1325	203	fig|6666666.904161.peg.1325	Heat shock protein GrpE	bi
1	1326	623	fig|6666666.904161.peg.1326	Chaperone protein DnaK	bi
1	1327	381	fig|6666666.904161.peg.1327	Chaperone protein DnaJ	bi
1	1328	392	fig|6666666.904161.peg.1328	Beta-lactamase class C-like and penicillin binding proteins (PBPs) superfamily	bi
1	1329	50	fig|6666666.904161.peg.1329	FIG00743858: hypothetical protein	bi
1	1330	509	fig|6666666.904161.peg.1330	D-alanine--poly(phosphoribitol) ligase subunit 1 (EC 6.1.1.13)	bi
1	1331	405	fig|6666666.904161.peg.1331	D-alanyl transfer protein DltB	bi
1	1332	79	fig|6666666.904161.peg.1332	D-alanine--poly(phosphoribitol) ligase ACP subunit (EC 6.1.1.13)	bi
1	1333	426	fig|6666666.904161.peg.1333	Poly(glycerophosphate chain) D-alanine transfer protein DltD	bi
1	1334	612	fig|6666666.904161.peg.1334	Translation elongation factor LepA	bi
1	1335	385	fig|6666666.904161.peg.1335	integrase, fragment	bi
1	1336	101	fig|6666666.904161.peg.1336	hypothetical protein	-
1	1337	306	fig|6666666.904161.peg.1337	hypothetical protein	-
1	1338	97	fig|6666666.904161.peg.1338	hypothetical protein	bi
1	1339	97	fig|6666666.904161.peg.1339	hypothetical protein	bi
1	1340	210	fig|6666666.904161.peg.1340	DNA-3-methyladenine glycosylase II (EC 3.2.2.21)	bi
1	1341	317	fig|6666666.904161.peg.1341	Ribosomal protein L11 methyltransferase	bi
1	1342	251	fig|6666666.904161.peg.1342	16S rRNA (uracil(1498)-N(3))-methyltransferase (EC 2.1.1.193)	bi
1	1343	112	fig|6666666.904161.peg.1343	FIG00746859: hypothetical protein	bi
1	1344	756	fig|6666666.904161.peg.1344	Guanosine-3',5'-bis(diphosphate) 3'-pyrophosphohydrolase (EC 3.1.7.2) / GTP pyrophosphokinase (EC 2.7.6.5), (p)ppGpp synthetase II	bi
1	1345	149	fig|6666666.904161.peg.1345	D-aminoacyl-tRNA deacylase (EC 3.1.1.96)	bi
1	1346	208	fig|6666666.904161.peg.1346	Phosphoglycolate phosphatase (EC 3.1.3.18)	bi
1	1347	289	fig|6666666.904161.peg.1347	Ribulosamine/erythrulosamine 3-kinase potentially involved in protein deglycation	bi
1	1348	283	fig|6666666.904161.peg.1348	N-acetylmuramoyl-L-alanine amidase (EC 3.5.1.28)	bi
1	1349	427	fig|6666666.904161.peg.1349	Histidyl-tRNA synthetase (EC 6.1.1.21)	bi
1	1350	599	fig|6666666.904161.peg.1350	Aspartyl-tRNA synthetase (EC 6.1.1.12)	bi
1	1351	177	fig|6666666.904161.peg.1351	Peptide-methionine (S)-S-oxide reductase MsrA (EC 1.8.4.11)	bi
1	1352	292	fig|6666666.904161.peg.1352	Uncharacterized UPF0750 membrane protein SPy2155	bi
1	1353	384	fig|6666666.904161.peg.1353	hypothetical protein	bi
1	1354	299	fig|6666666.904161.peg.1354	Endonuclease IV (EC 3.1.21.2)	bi
1	1355	210	fig|6666666.904161.peg.1355	short-chain dehydrogenase/oxidoreductase	bi
1	1356	273	fig|6666666.904161.peg.1356	Phosphoenolpyruvate synthase regulatory protein	bi
1	1357	63	fig|6666666.904161.peg.1357	SSU ribosomal protein S21p	bi
1	1358	148	fig|6666666.904161.peg.1358	Transamidase GatB domain protein	bi
1	1359	46	fig|6666666.904161.peg.1359	hypothetical protein	-
1	1360	324	fig|6666666.904161.peg.1360	Phosphate starvation-inducible protein PhoH, predicted ATPase	bi
1	1361	160	fig|6666666.904161.peg.1361	Metal-dependent hydrolase YbeY, involved in rRNA and/or ribosome maturation and assembly	bi
1	1362	139	fig|6666666.904161.peg.1362	Diacylglycerol kinase (EC 2.7.1.107)	bi
1	1363	303	fig|6666666.904161.peg.1363	GTP-binding protein Era	bi
1	1364	263	fig|6666666.904161.peg.1364	DNA recombination and repair protein RecO	bi
1	1365	300	fig|6666666.904161.peg.1365	Glycyl-tRNA synthetase alpha chain (EC 6.1.1.14)	bi
1	1366	695	fig|6666666.904161.peg.1366	Glycyl-tRNA synthetase beta chain (EC 6.1.1.14)	bi
1	1367	626	fig|6666666.904161.peg.1367	DNA primase DnaG	bi
1	1368	369	fig|6666666.904161.peg.1368	RNA polymerase sigma factor RpoD	bi
1	1369	43	fig|6666666.904161.peg.1369	hypothetical protein	bi
1	1370	130	fig|6666666.904161.peg.1370	Transcriptional regulator, GntR family	bi
1	1371	298	fig|6666666.904161.peg.1371	ABC transporter, ATP-binding protein	bi
1	1372	357	fig|6666666.904161.peg.1372	ABC transporter, permease protein	bi
1	1373	353	fig|6666666.904161.peg.1373	hypothetical protein	bi
1	1374	251	fig|6666666.904161.peg.1374	hypothetical protein	bi
1	1375	300	fig|6666666.904161.peg.1375	ABC-type multidrug transport system, ATPase component	bi
1	1376	138	fig|6666666.904161.peg.1376	Uncharacterized protein DUF2992, B. subtilis YjdF ortholog	-
1	1377	46	fig|6666666.904161.peg.1377	hypothetical protein	-
1	1378	223	fig|6666666.904161.peg.1378	hypothetical protein	bi
1	1379	146	fig|6666666.904161.peg.1379	Predicted transcriptional regulators	bi
1	1380	156	fig|6666666.904161.peg.1380	hypothetical protein	bi
1	1381	50	fig|6666666.904161.peg.1381	hypothetical protein	bi
1	1382	296	fig|6666666.904161.peg.1382	Efflux ABC transporter, ATP-binding protein	bi
1	1383	257	fig|6666666.904161.peg.1383	Efflux ABC transporter, permease protein	bi
1	1384	367	fig|6666666.904161.peg.1384	Two-component system sensor histidine kinase	bi
1	1385	202	fig|6666666.904161.peg.1385	Two-component transcriptional response regulator, NarL/FixJ family	bi
1	1386	469	fig|6666666.904161.peg.1386	NADH peroxidase Npx (EC 1.11.1.1)	bi
1	1387	83	fig|6666666.904161.peg.1387	hypothetical protein	bi
1	1388	315	fig|6666666.904161.peg.1388	Zinc-type alcohol dehydrogenase-like protein	bi
1	1389	297	fig|6666666.904161.peg.1389	Transcriptional regulator, LysR family	bi
1	1390	145	fig|6666666.904161.peg.1390	hypothetical protein	bi
1	1391	214	fig|6666666.904161.peg.1391	hypothetical protein	bi
1	1392	285	fig|6666666.904161.peg.1392	Cell surface hydrolase	bi
1	1393	238	fig|6666666.904161.peg.1393	Transcriptional regulator, RpiR family	bi
1	1394	203	fig|6666666.904161.peg.1394	Galactoside O-acetyltransferase (EC 2.3.1.18)	bi
1	1395	211	fig|6666666.904161.peg.1395	Phosphoglycolate phosphatase (EC 3.1.3.18)	bi
1	1396	40	fig|6666666.904161.peg.1396	hypothetical protein	-
1	1397	144	fig|6666666.904161.peg.1397	Mobile element protein	-
1	1398	124	fig|6666666.904161.peg.1398	Mobile element protein	-
1	1399	427	fig|6666666.904161.peg.1399	hypothetical protein	uni
1	1400	177	fig|6666666.904161.peg.1400	Transposase	uni
1	1401	296	fig|6666666.904161.peg.1401	Putative transposase InsK for insertion sequence element IS150	uni
1	1402	176	fig|6666666.904161.peg.1402	cell surface hydrolase (putative)	uni
1	1403	178	fig|6666666.904161.peg.1403	hypothetical protein	-
1	1404	425	fig|6666666.904161.peg.1404	hypothetical protein	-
1	1405	184	fig|6666666.904161.peg.1405	Transcriptional regulator, AcrR family	uni
1	1406	560	fig|6666666.904161.peg.1406	FIG00744162: hypothetical protein	bi
1	1407	44	fig|6666666.904161.peg.1407	hypothetical protein	-
1	1408	211	fig|6666666.904161.peg.1408	oxidoreductase (putative)	bi
1	1409	130	fig|6666666.904161.peg.1409	hypothetical protein	bi
1	1410	134	fig|6666666.904161.peg.1410	negative regulator of proteolysis	bi
1	1411	202	fig|6666666.904161.peg.1411	MutT/nudix family protein	bi
1	1412	251	fig|6666666.904161.peg.1412	Transcriptional repressor GlcR, DeoR family	bi
1	1413	564	fig|6666666.904161.peg.1413	hypothetical protein	bi
1	1414	382	fig|6666666.904161.peg.1414	Uncharacterized deacetylase	bi
1	1415	150	fig|6666666.904161.peg.1415	Transcriptional regulator, MarR family	bi
1	1416	465	fig|6666666.904161.peg.1416	Uncharacterized MFS-type transporter	bi
1	1417	430	fig|6666666.904161.peg.1417	Enolase (EC 4.2.1.11)	bi
1	1418	754	fig|6666666.904161.peg.1418	hypothetical protein	bi
1	1419	325	fig|6666666.904161.peg.1419	Putative oxidoreductase	bi
1	1420	49	fig|6666666.904161.peg.1420	hypothetical protein	-
1	1421	367	fig|6666666.904161.peg.1421	hypothetical protein	bi
1	1422	382	fig|6666666.904161.peg.1422	hypothetical protein	bi
1	1423	178	fig|6666666.904161.peg.1423	hypothetical protein	bi
1	1424	123	fig|6666666.904161.peg.1424	Sulfur carrier protein ThiS adenylyltransferase (EC 2.7.7.73)	bi
1	1425	799	fig|6666666.904161.peg.1425	Phosphoenolpyruvate synthase (EC 2.7.9.2)	bi
1	1426	169	fig|6666666.904161.peg.1426	Putative transcription regulator	bi
1	1427	314	fig|6666666.904161.peg.1427	Efflux ABC transporter, ATP-binding protein	bi
1	1428	257	fig|6666666.904161.peg.1428	Efflux ABC transporter, permease protein	bi
1	1429	402	fig|6666666.904161.peg.1429	hypothetical protein	bi
1	1430	236	fig|6666666.904161.peg.1430	tRNA (adenine(22)-N(1))-methyltransferase (EC 2.1.1.217)	bi
1	1431	341	fig|6666666.904161.peg.1431	GTP cyclohydrolase 1 type 2 homolog YbgI	bi
1	1432	413	fig|6666666.904161.peg.1432	Tripeptide aminopeptidase (EC 3.4.11.4)	bi
1	1433	868	fig|6666666.904161.peg.1433	Chaperone protein ClpB (ATP-dependent unfoldase)	bi
1	1434	47	fig|6666666.904161.peg.1434	hypothetical protein	bi
1	1435	67	fig|6666666.904161.peg.1435	FIG00743751: hypothetical protein	bi
1	1436	1117	fig|6666666.904161.peg.1436	DNA polymerase III alpha subunit (EC 2.7.7.7)	bi
1	1437	321	fig|6666666.904161.peg.1437	6-phosphofructokinase (EC 2.7.1.11)	bi
1	1438	587	fig|6666666.904161.peg.1438	Pyruvate kinase (EC 2.7.1.40) / Phosphohistidine swiveling domain	bi
1	1439	153	fig|6666666.904161.peg.1439	UPF0756 membrane protein YtwI	bi
1	1440	296	fig|6666666.904161.peg.1440	Uncharacterized S1 RNA binding domain protein YitL	bi
1	1441	306	fig|6666666.904161.peg.1441	Site-specific tyrosine recombinase XerD	bi
1	1442	128	fig|6666666.904161.peg.1442	RibT protein, riboflavin biosynthesis acetyltransferase (GNAT) family	bi
1	1443	256	fig|6666666.904161.peg.1443	Segregation and condensation protein A	bi
1	1444	200	fig|6666666.904161.peg.1444	Segregation and condensation protein B	bi
1	1445	239	fig|6666666.904161.peg.1445	LSU rRNA pseudouridine(2605) synthase (EC 5.4.99.22)	bi
1	1446	195	fig|6666666.904161.peg.1446	Substrate-specific component RibU of riboflavin ECF transporter	bi
1	1447	348	fig|6666666.904161.peg.1447	hypothetical protein	bi
1	1448	480	fig|6666666.904161.peg.1448	ATP-dependent DNA helicase RecQ	bi
1	1449	211	fig|6666666.904161.peg.1449	hypothetical protein	bi
1	1450	229	fig|6666666.904161.peg.1450	Cytidylate kinase (EC 2.7.4.25)	bi
1	1451	430	fig|6666666.904161.peg.1451	SSU ribosomal protein S1p	bi
1	1452	437	fig|6666666.904161.peg.1452	GTP-binding protein EngA	bi
1	1453	92	fig|6666666.904161.peg.1453	DNA-binding protein HBsu	bi
1	1454	423	fig|6666666.904161.peg.1454	TPR-repeat-containing protein	bi
1	1455	266	fig|6666666.904161.peg.1455	Hydrolase, HAD superfamily	bi
1	1456	45	fig|6666666.904161.peg.1456	hypothetical protein	bi
1	1457	262	fig|6666666.904161.peg.1457	4-hydroxy-tetrahydrodipicolinate reductase (EC 1.17.1.8)	bi
1	1458	408	fig|6666666.904161.peg.1458	CCA tRNA nucleotidyltransferase (EC 2.7.7.72)	bi
1	1459	151	fig|6666666.904161.peg.1459	FIG00744866: hypothetical protein	bi
1	1460	637	fig|6666666.904161.peg.1460	Bis-ABC ATPase Uup	bi
1	1461	317	fig|6666666.904161.peg.1461	Thymidylate synthase (EC 2.1.1.45)	bi
1	1462	164	fig|6666666.904161.peg.1462	Dihydrofolate reductase (EC 1.5.1.3)	bi
1	1463	284	fig|6666666.904161.peg.1463	DegV family protein	bi
1	1464	315	fig|6666666.904161.peg.1464	FIG006988: Lipase/Acylhydrolase with GDSL-like motif	bi
1	1465	215	fig|6666666.904161.peg.1465	YfaA	bi
1	1466	74	fig|6666666.904161.peg.1466	UPF0346 protein YozE	bi
1	1467	493	fig|6666666.904161.peg.1467	Periplasmic protease	bi
1	1468	492	fig|6666666.904161.peg.1468	Uncharacterized MFS-type transporter	bi
1	1469	353	fig|6666666.904161.peg.1469	Oxidoreductase	bi
1	1470	233	fig|6666666.904161.peg.1470	Predicted dinucleotide-binding enzymes	bi
1	1471	312	fig|6666666.904161.peg.1471	Mrr restriction system protein	bi
1	1472	310	fig|6666666.904161.peg.1472	Methionine biosynthesis and transport regulator MtaR, LysR family	bi
1	1473	383	fig|6666666.904161.peg.1473	5-methyltetrahydropteroyltriglutamate--homocysteine methyltransferase (EC 2.1.1.14)	bi
1	1474	76	fig|6666666.904161.peg.1474	hypothetical protein	-
1	1475	285	fig|6666666.904161.peg.1475	LSU ribosomal maturation GTPase RbgA (B. subtilis YlqF)	bi
1	1476	256	fig|6666666.904161.peg.1476	Ribonuclease HII (EC 3.1.26.4)	bi
1	1477	289	fig|6666666.904161.peg.1477	Rossmann fold nucleotide-binding protein Smf possibly involved in DNA uptake	bi
1	1478	716	fig|6666666.904161.peg.1478	DNA topoisomerase I (EC 5.99.1.2)	bi
1	1479	442	fig|6666666.904161.peg.1479	Methylenetetrahydrofolate--tRNA-(uracil-5-)-methyltransferase TrmFO (EC 2.1.1.74)	bi
1	1480	315	fig|6666666.904161.peg.1480	Site-specific tyrosine recombinase XerC	bi
1	1481	181	fig|6666666.904161.peg.1481	ATP-dependent protease subunit HslV (EC 3.4.25.2)	bi
1	1482	473	fig|6666666.904161.peg.1482	ATP-dependent hsl protease ATP-binding subunit HslU	bi
1	1483	293	fig|6666666.904161.peg.1483	LacX protein, plasmid	bi
1	1484	209	fig|6666666.904161.peg.1484	Acyl-phosphate:glycerol-3-phosphate O-acyltransferase PlsY (EC 2.3.1.n3)	bi
1	1485	669	fig|6666666.904161.peg.1485	DNA topoisomerase IV subunit B (EC 5.99.1.3)	bi
1	1486	817	fig|6666666.904161.peg.1486	DNA topoisomerase IV subunit A (EC 5.99.1.3)	bi
1	1487	320	fig|6666666.904161.peg.1487	Transcriptional regulator, LysR family	bi
1	1488	310	fig|6666666.904161.peg.1488	Manganese-dependent inorganic pyrophosphatase (EC 3.6.1.1)	bi
1	1489	145	fig|6666666.904161.peg.1489	Peptide-methionine (R)-S-oxide reductase MsrB (EC 1.8.4.12)	bi
1	1490	172	fig|6666666.904161.peg.1490	Peptide-methionine (S)-S-oxide reductase MsrA (EC 1.8.4.11)	bi
1	1491	67	fig|6666666.904161.peg.1491	hypothetical protein	bi
1	1492	285	fig|6666666.904161.peg.1492	FIG00748761: hypothetical protein	bi
1	1493	507	fig|6666666.904161.peg.1493	hypothetical protein	bi
1	1494	435	fig|6666666.904161.peg.1494	glycosyltransferase (putative)	bi
1	1495	133	fig|6666666.904161.peg.1495	hypothetical protein	bi
1	1496	450	fig|6666666.904161.peg.1496	similar to glutathione reductase	bi
1	1497	146	fig|6666666.904161.peg.1497	Organic hydroperoxide resistance transcriptional regulator	bi
1	1498	176	fig|6666666.904161.peg.1498	N1-spermidine/spermine acetyltransferase PaiA	bi
1	1499	633	fig|6666666.904161.peg.1499	CDP-ribitol ribitolphosphotransferase (EC 2.7.8.14)	bi
1	1500	374	fig|6666666.904161.peg.1500	CDP-ribitol:poly(ribitol phosphate) ribitol phosphotransferase	bi
1	1501	342	fig|6666666.904161.peg.1501	Xylitol dehydrogenase	bi
1	1502	234	fig|6666666.904161.peg.1502	Sugar-phosphate cytidylyltransferase	bi
1	1503	450	fig|6666666.904161.peg.1503	FIG00746930: hypothetical protein	bi
1	1504	528	fig|6666666.904161.peg.1504	L-lactate permease	bi
1	1505	117	fig|6666666.904161.peg.1505	hypothetical protein	bi
1	1506	295	fig|6666666.904161.peg.1506	hypothetical protein	bi
1	1507	447	fig|6666666.904161.peg.1507	D-serine/D-alanine/glycine transporter	bi
1	1508	62	fig|6666666.904161.peg.1508	hypothetical protein	bi
1	1509	286	fig|6666666.904161.peg.1509	FIG028593: membrane protein	bi
1	1510	246	fig|6666666.904161.peg.1510	Acid-resistant locus arl7 (Fragment)	bi
1	1511	103	fig|6666666.904161.peg.1511	FIG00748425: hypothetical protein	bi
1	1512	111	fig|6666666.904161.peg.1512	hypothetical protein	bi
1	1513	396	fig|6666666.904161.peg.1513	Transport protein	bi
1	1514	263	fig|6666666.904161.peg.1514	Galactose-1-phosphate uridylyltransferase (EC 2.7.7.10)	bi
1	1515	97	fig|6666666.904161.peg.1515	hypothetical protein	bi
1	1516	245	fig|6666666.904161.peg.1516	hypothetical protein	bi
1	1517	246	fig|6666666.904161.peg.1517	hypothetical protein	bi
1	1518	145	fig|6666666.904161.peg.1518	acetyltransferase (putative)	bi
1	1519	290	fig|6666666.904161.peg.1519	DegV family protein	bi
1	1520	141	fig|6666666.904161.peg.1520	Transcriptional regulator, MarR family	bi
1	1521	569	fig|6666666.904161.peg.1521	Fibronectin/fibrinogen-binding protein	bi
1	1522	254	fig|6666666.904161.peg.1522	ABC transporter, permease protein	bi
1	1523	300	fig|6666666.904161.peg.1523	Efflux ABC transporter, ATP-binding protein	uni
1	1524	165	fig|6666666.904161.peg.1524	MutT/Nudix family protein	bi
1	1525	242	fig|6666666.904161.peg.1525	DNA-binding response regulator, CitB family (Rec-wHTH domains)	bi
1	1526	124	fig|6666666.904161.peg.1526	FIG00748148: hypothetical protein	bi
1	1527	223	fig|6666666.904161.peg.1527	Chloramphenicol O-acetyltransferase	bi
1	1528	40	fig|6666666.904161.peg.1528	hypothetical protein	bi
1	1529	132	fig|6666666.904161.peg.1529	YdhG-like protein	bi
1	1530	200	fig|6666666.904161.peg.1530	Phosphoglycerate mutase family protein	bi
1	1531	854	fig|6666666.904161.peg.1531	Carbamoyl-phosphate synthase large chain (EC 6.3.5.5)	bi
1	1532	361	fig|6666666.904161.peg.1532	Carbamoyl-phosphate synthase small chain (EC 6.3.5.5)	bi
1	1533	175	fig|6666666.904161.peg.1533	Pyrimidine operon regulatory protein PyrR	bi
1	1534	308	fig|6666666.904161.peg.1534	LSU rRNA pseudouridine(1911/1915/1917) synthase (EC 5.4.99.23)	bi
1	1535	150	fig|6666666.904161.peg.1535	Lipoprotein signal peptidase (EC 3.4.23.36)	bi
1	1536	552	fig|6666666.904161.peg.1536	Formate--tetrahydrofolate ligase (EC 6.3.4.3)	bi
1	1537	129	fig|6666666.904161.peg.1537	FIG00742356: hypothetical protein	bi
1	1538	129	fig|6666666.904161.peg.1538	Ribonuclease HI, Bacillus nonfunctional homolog	bi
1	1539	369	fig|6666666.904161.peg.1539	Glycine/D-amino acid oxidases family	bi
1	1540	265	fig|6666666.904161.peg.1540	hypothetical protein	bi
1	1541	360	fig|6666666.904161.peg.1541	hypothetical protein	bi
1	1542	226	fig|6666666.904161.peg.1542	possible ABC transporter, ATP binding component	bi
1	1543	253	fig|6666666.904161.peg.1543	FIG00750966: hypothetical protein	bi
1	1544	323	fig|6666666.904161.peg.1544	Microcin C7 immunity MccF-like protein	bi
1	1545	446	fig|6666666.904161.peg.1545	Phage lysin, glycosyl hydrolase, family 25	bi
1	1546	124	fig|6666666.904161.peg.1546	Mobile element protein	-
1	1547	144	fig|6666666.904161.peg.1547	Mobile element protein	-
1	1548	163	fig|6666666.904161.peg.1548	Protein export cytoplasm protein SecA ATPase RNA helicase (TC 3.A.5.1.1)	bi
1	1549	360	fig|6666666.904161.peg.1549	Muramoyltetrapeptide carboxypeptidase (EC 3.4.17.13)	bi
1	1550	447	fig|6666666.904161.peg.1550	FIG00744610: hypothetical protein	bi
1	1551	136	fig|6666666.904161.peg.1551	FIG00753608: hypothetical protein	bi
1	1552	251	fig|6666666.904161.peg.1552	Hydrolase, alpha/beta fold family	bi
1	1553	455	fig|6666666.904161.peg.1553	Uncharacterized MFS-type transporter	bi
1	1554	40	fig|6666666.904161.peg.1554	hypothetical protein	bi
1	1555	99	fig|6666666.904161.peg.1555	Transcriptional regulator, ArsR family	bi
1	1556	401	fig|6666666.904161.peg.1556	23S rRNA (guanine(2445)-N(2))-methyltransferase (EC 2.1.1.173)	bi
1	1557	41	fig|6666666.904161.peg.1557	hypothetical protein	bi
1	1558	114	fig|6666666.904161.peg.1558	Cell division protein GpsB, coordinates the switch between cylindrical and septal cell wall synthesis by re-localization of PBP1	bi
1	1559	190	fig|6666666.904161.peg.1559	UPF0398 protein YpsA	bi
1	1560	208	fig|6666666.904161.peg.1560	RecU Holliday junction resolvase	bi
1	1561	768	fig|6666666.904161.peg.1561	Multimodular transpeptidase-transglycosylase (EC 2.4.1.129) (EC 3.4.-.-) / Penicillin-binding protein 1A/1B (PBP1)	bi
1	1562	318	fig|6666666.904161.peg.1562	Molybdenum transport ATP-binding protein ModC (TC 3.A.1.8.1)	bi
1	1563	337	fig|6666666.904161.peg.1563	hypothetical protein	bi
1	1564	562	fig|6666666.904161.peg.1564	Ferric iron ABC transporter, permease protein	bi
1	1565	167	fig|6666666.904161.peg.1565	Universal stress protein family	bi
1	1566	286	fig|6666666.904161.peg.1566	Methionine ABC transporter substrate-binding protein	bi
1	1567	224	fig|6666666.904161.peg.1567	Methionine ABC transporter permease protein	bi
1	1568	356	fig|6666666.904161.peg.1568	Methionine ABC transporter ATP-binding protein	bi
1	1569	67	fig|6666666.904161.peg.1569	hypothetical protein	bi
1	1570	242	fig|6666666.904161.peg.1570	Chromosome replication initiation protein DnaD	bi
1	1571	433	fig|6666666.904161.peg.1571	Asparaginyl-tRNA synthetase (EC 6.1.1.22)	bi
1	1572	402	fig|6666666.904161.peg.1572	Aspartate aminotransferase (EC 2.6.1.1)	bi
1	1573	167	fig|6666666.904161.peg.1573	FIG00742179: hypothetical protein	bi
1	1574	935	fig|6666666.904161.peg.1574	DinG family ATP-dependent helicase YoaA	bi
1	1575	313	fig|6666666.904161.peg.1575	Mevalonate kinase (EC 2.7.1.36)	bi
1	1576	326	fig|6666666.904161.peg.1576	Diphosphomevalonate decarboxylase (EC 4.1.1.33)	bi
1	1577	364	fig|6666666.904161.peg.1577	Phosphomevalonate kinase (EC 2.7.4.2)	bi
1	1578	349	fig|6666666.904161.peg.1578	Isopentenyl-diphosphate delta-isomerase, FMN-dependent (EC 5.3.3.2)	bi
1	1579	338	fig|6666666.904161.peg.1579	Aldose 1-epimerase (EC 5.1.3.3)	bi
1	1580	749	fig|6666666.904161.peg.1580	Maltose phosphorylase (EC 2.4.1.8)	bi
1	1581	449	fig|6666666.904161.peg.1581	Uncharacterized MFS-type transporter	bi
1	1582	291	fig|6666666.904161.peg.1582	hypothetical protein	bi
1	1583	456	fig|6666666.904161.peg.1583	tRNA/rRNA cytosine-C5-methyltransferase	bi
1	1584	272	fig|6666666.904161.peg.1584	Hydrolase, HAD superfamily	bi
1	1585	500	fig|6666666.904161.peg.1585	Uncharacterized amino acid permease, GabP family	bi
1	1586	450	fig|6666666.904161.peg.1586	Aminotransferase	bi
1	1587	49	fig|6666666.904161.peg.1587	hypothetical protein	-
1	1588	91	fig|6666666.904161.peg.1588	lipoprotein precursor (putative)	bi
1	1589	100	fig|6666666.904161.peg.1589	FIG00753398: hypothetical protein	bi
1	1590	259	fig|6666666.904161.peg.1590	Potassium voltage-gated channel subfamily KQT; possible potassium channel, VIC family	bi
1	1591	306	fig|6666666.904161.peg.1591	Putative prenyltransferase, contains 1,4-dihydroxy-2-naphthoate octaprenyltransferase domain	bi
1	1592	442	fig|6666666.904161.peg.1592	Diaminopimelate decarboxylase (EC 4.1.1.20)	bi
1	1593	65	fig|6666666.904161.peg.1593	2-hydroxymuconate tautomerase-like protein	bi
1	1594	480	fig|6666666.904161.peg.1594	Dipeptidase	bi
1	1595	39	fig|6666666.904161.peg.1595	hypothetical protein	bi
1	1596	89	fig|6666666.904161.peg.1596	hypothetical protein	bi
1	1597	74	fig|6666666.904161.peg.1597	hypothetical protein	bi
1	1598	89	fig|6666666.904161.peg.1598	FIG028593: membrane protein	bi
1	1599	40	fig|6666666.904161.peg.1599	hypothetical protein	bi
1	1600	83	fig|6666666.904161.peg.1600	hypothetical protein	bi
1	1601	299	fig|6666666.904161.peg.1601	Transcription regulator [contains diacylglycerol kinase catalytic domain]	bi
1	1602	122	fig|6666666.904161.peg.1602	Integral membrane protein	bi
1	1603	153	fig|6666666.904161.peg.1603	Universal stress protein family	bi
1	1604	162	fig|6666666.904161.peg.1604	Tryptophan-rich sensory protein	bi
1	1605	83	fig|6666666.904161.peg.1605	hypothetical protein	bi
1	1606	127	fig|6666666.904161.peg.1606	FIG00744317: hypothetical protein	bi
1	1607	202	fig|6666666.904161.peg.1607	Chitin binding protein	bi
1	1608	71	fig|6666666.904161.peg.1608	transposase, fragment	uni
1	1609	106	fig|6666666.904161.peg.1609	transposase, fragment (putative)	uni
1	1610	391	fig|6666666.904161.peg.1610	Cyclopropane-fatty-acyl-phospholipid synthase (EC 2.1.1.79)	bi
1	1611	67	fig|6666666.904161.peg.1611	putative membrane protein	bi
1	1612	113	fig|6666666.904161.peg.1612	FIG00745091: hypothetical protein	bi
1	1613	289	fig|6666666.904161.peg.1613	Membrane protease family protein BA0301	bi
1	1614	568	fig|6666666.904161.peg.1614	Uncharacterized MFS-type transporter	bi
1	1615	184	fig|6666666.904161.peg.1615	transcription regulator (putative)	bi
1	1616	353	fig|6666666.904161.peg.1616	Probable GTPase related to EngC	bi
1	1617	167	fig|6666666.904161.peg.1617	Acyl-CoA hydrolase (EC 3.1.2.20)	bi
1	1618	296	fig|6666666.904161.peg.1618	Glutamate synthase operon transcriptional activator GltC, LysR family	bi
1	1619	242	fig|6666666.904161.peg.1619	Uncharacterized DUF554 membrane protein	bi
1	1620	184	fig|6666666.904161.peg.1620	4'-phosphopantetheinyl transferase (EC 2.7.8.-)	bi
1	1621	253	fig|6666666.904161.peg.1621	Enoyl-[acyl-carrier-protein] reductase [NADH] (EC 1.3.1.9)	bi
1	1622	257	fig|6666666.904161.peg.1622	Acetyl-coenzyme A carboxyl transferase alpha chain (EC 6.4.1.2)	bi
1	1623	281	fig|6666666.904161.peg.1623	Acetyl-coenzyme A carboxyl transferase beta chain (EC 6.4.1.2)	bi
1	1624	463	fig|6666666.904161.peg.1624	Biotin carboxylase of acetyl-CoA carboxylase (EC 6.3.4.14)	bi
1	1625	138	fig|6666666.904161.peg.1625	3-hydroxyacyl-[acyl-carrier-protein] dehydratase, FabZ form (EC 4.2.1.59)	bi
1	1626	154	fig|6666666.904161.peg.1626	Biotin carboxyl carrier protein of acetyl-CoA carboxylase	bi
1	1627	411	fig|6666666.904161.peg.1627	3-oxoacyl-[acyl-carrier-protein] synthase, KASII (EC 2.3.1.179)	bi
1	1628	241	fig|6666666.904161.peg.1628	3-oxoacyl-[acyl-carrier protein] reductase (EC 1.1.1.100), FadG	bi
1	1629	311	fig|6666666.904161.peg.1629	Malonyl CoA-acyl carrier protein transacylase (EC 2.3.1.39)	bi
1	1630	83	fig|6666666.904161.peg.1630	Acyl carrier protein	bi
1	1631	329	fig|6666666.904161.peg.1631	3-oxoacyl-[acyl-carrier-protein] synthase, KASIII (EC 2.3.1.180)	bi
1	1632	148	fig|6666666.904161.peg.1632	3-hydroxyacyl-[acyl-carrier-protein] dehydratase, FabZ form (EC 4.2.1.59)	bi
1	1633	329	fig|6666666.904161.peg.1633	hypothetical protein	bi
1	1634	271	fig|6666666.904161.peg.1634	Short-chain dehydrogenase	bi
1	1635	41	fig|6666666.904161.peg.1635	hypothetical protein	-
1	1636	121	fig|6666666.904161.peg.1636	hypothetical protein	bi
1	1637	351	fig|6666666.904161.peg.1637	Alcohol dehydrogenase (EC 1.1.1.1)	bi
1	1638	378	fig|6666666.904161.peg.1638	hypothetical protein	uni
1	1639	413	fig|6666666.904161.peg.1639	putative membrane protein	-
1	1640	169	fig|6666666.904161.peg.1640	FIG00750750: hypothetical protein	-
1	1641	298	fig|6666666.904161.peg.1641	Quinone oxidoreductase (EC 1.6.5.5)	bi
1	1642	180	fig|6666666.904161.peg.1642	Isochorismatase (EC 3.3.2.1)	bi
1	1643	265	fig|6666666.904161.peg.1643	Tryptophan synthase alpha chain (EC 4.2.1.20)	bi
1	1644	400	fig|6666666.904161.peg.1644	Tryptophan synthase beta chain (EC 4.2.1.20)	bi
1	1645	209	fig|6666666.904161.peg.1645	Phosphoribosylanthranilate isomerase (EC 5.3.1.24)	bi
1	1646	261	fig|6666666.904161.peg.1646	Indole-3-glycerol phosphate synthase (EC 4.1.1.48)	bi
1	1647	340	fig|6666666.904161.peg.1647	Anthranilate phosphoribosyltransferase (EC 2.4.2.18)	bi
1	1648	192	fig|6666666.904161.peg.1648	hypothetical protein	bi
1	1649	479	fig|6666666.904161.peg.1649	Anthranilate synthase, aminase component (EC 4.1.3.27)	bi
1	1650	50	fig|6666666.904161.peg.1650	hypothetical protein	bi
1	1651	533	fig|6666666.904161.peg.1651	hypothetical protein	bi
1	1652	255	fig|6666666.904161.peg.1652	ABC transporter, ATP-binding protein	bi
1	1653	157	fig|6666666.904161.peg.1653	FIG00750683: hypothetical protein	bi
1	1654	1803	fig|6666666.904161.peg.1654	cell surface protein precursor	bi
1	1655	107	fig|6666666.904161.peg.1655	FIG00748957: hypothetical protein	bi
1	1656	119	fig|6666666.904161.peg.1656	LSU ribosomal protein L19p	bi
1	1657	247	fig|6666666.904161.peg.1657	tRNA (guanine(37)-N(1))-methyltransferase (EC 2.1.1.228)	bi
1	1658	175	fig|6666666.904161.peg.1658	16S rRNA processing protein RimM	bi
1	1659	86	fig|6666666.904161.peg.1659	KH domain RNA binding protein YlqC	bi
1	1660	91	fig|6666666.904161.peg.1660	SSU ribosomal protein S16p	bi
1	1661	485	fig|6666666.904161.peg.1661	Signal recognition particle protein Ffh	bi
1	1662	116	fig|6666666.904161.peg.1662	Signal recognition particle associated protein	bi
1	1663	513	fig|6666666.904161.peg.1663	Signal recognition particle receptor FtsY	bi
1	1664	1186	fig|6666666.904161.peg.1664	Chromosome partition protein smc	bi
1	1665	232	fig|6666666.904161.peg.1665	Ribonuclease III (EC 3.1.26.3)	bi
1	1666	82	fig|6666666.904161.peg.1666	Acyl carrier protein	bi
1	1667	349	fig|6666666.904161.peg.1667	Phosphate:acyl-ACP acyltransferase PlsX (EC 2.3.1.n2)	bi
1	1668	680	fig|6666666.904161.peg.1668	ATP-dependent DNA helicase RecG (EC 3.6.4.12)	bi
1	1669	571	fig|6666666.904161.peg.1669	Dihydroxyacetone kinase-like protein, phosphatase domain / Dihydroxyacetone kinase-like protein, kinase domain	bi
1	1670	121	fig|6666666.904161.peg.1670	FIG001802: Putative alkaline-shock protein	bi
1	1671	62	fig|6666666.904161.peg.1671	LSU ribosomal protein L28p @ LSU ribosomal protein L28p, zinc-independent	bi
1	1672	48	fig|6666666.904161.peg.1672	hypothetical protein	bi
1	1673	220	fig|6666666.904161.peg.1673	Thiamin pyrophosphokinase (EC 2.7.6.2)	bi
1	1674	218	fig|6666666.904161.peg.1674	Ribulose-phosphate 3-epimerase (EC 5.1.3.1)	bi
1	1675	299	fig|6666666.904161.peg.1675	Ribosome small subunit biogenesis RbfA-release protein RsgA	bi
1	1676	675	fig|6666666.904161.peg.1676	Serine/threonine protein kinase PrkC, regulator of stationary phase	bi
1	1677	249	fig|6666666.904161.peg.1677	Protein serine/threonine phosphatase PrpC, regulation of stationary phase	bi
1	1678	448	fig|6666666.904161.peg.1678	16S rRNA (cytosine(967)-C(5))-methyltransferase (EC 2.1.1.176)	bi
1	1679	318	fig|6666666.904161.peg.1679	Methionyl-tRNA formyltransferase (EC 2.1.2.9)	bi
1	1680	806	fig|6666666.904161.peg.1680	Helicase PriA essential for oriC/DnaA-independent DNA replication	bi
1	1681	409	fig|6666666.904161.peg.1681	Phosphopantothenoylcysteine decarboxylase (EC 4.1.1.36) / Phosphopantothenoylcysteine synthetase (EC 6.3.2.5)	bi
1	1682	71	fig|6666666.904161.peg.1682	DNA-directed RNA polymerase omega subunit (EC 2.7.7.6)	bi
1	1683	207	fig|6666666.904161.peg.1683	Guanylate kinase (EC 2.7.4.8)	bi
1	1684	112	fig|6666666.904161.peg.1684	FIG00742493: hypothetical protein	bi
1	1685	218	fig|6666666.904161.peg.1685	Choline ABC transport system, permease protein OpuBD	bi
1	1686	312	fig|6666666.904161.peg.1686	Choline ABC transport system, choline-binding protein OpuBC	bi
1	1687	210	fig|6666666.904161.peg.1687	Choline ABC transport system, permease protein OpuBB	bi
1	1688	395	fig|6666666.904161.peg.1688	Choline ABC transport system, ATP-binding protein OpuBA	bi
1	1689	565	fig|6666666.904161.peg.1689	DNA repair protein RecN	bi
1	1690	153	fig|6666666.904161.peg.1690	Arginine pathway regulatory protein ArgR, repressor of arg regulon	bi
1	1691	273	fig|6666666.904161.peg.1691	RNA binding methyltransferase FtsJ like	bi
1	1692	297	fig|6666666.904161.peg.1692	(2E,6E)-farnesyl diphosphate synthase (EC 2.5.1.10)	bi
1	1693	77	fig|6666666.904161.peg.1693	Exodeoxyribonuclease VII small subunit (EC 3.1.11.6)	bi
1	1694	448	fig|6666666.904161.peg.1694	Exodeoxyribonuclease VII large subunit (EC 3.1.11.6)	bi
1	1695	287	fig|6666666.904161.peg.1695	Methenyltetrahydrofolate cyclohydrolase (EC 3.5.4.9) / Methylenetetrahydrofolate dehydrogenase (NADP+) (EC 1.5.1.5)	bi
1	1696	140	fig|6666666.904161.peg.1696	Transcription termination protein NusB	bi
1	1697	153	fig|6666666.904161.peg.1697	Alkaline shock protein	bi
1	1698	186	fig|6666666.904161.peg.1698	Translation elongation factor P	bi
1	1699	354	fig|6666666.904161.peg.1699	Aminopeptidase YpdF (MP-, MA-, MS-, AP-, NP- specific)	bi
1	1700	93	fig|6666666.904161.peg.1700	LSU ribosomal protein L27p	bi
1	1701	112	fig|6666666.904161.peg.1701	FIG139598: Potential ribosomal protein	bi
1	1702	103	fig|6666666.904161.peg.1702	LSU ribosomal protein L21p	bi
1	1703	210	fig|6666666.904161.peg.1703	hypothetical protein	bi
1	1704	52	fig|6666666.904161.peg.1704	hypothetical protein	bi
1	1705	42	fig|6666666.904161.peg.1705	hypothetical protein	bi
1	1706	67	fig|6666666.904161.peg.1706	hypothetical protein	bi
1	1707	113	fig|6666666.904161.peg.1707	FIG00753159: hypothetical protein	bi
1	1708	180	fig|6666666.904161.peg.1708	Dimeric dUTPase (EC 3.6.1.23)	bi
1	1709	319	fig|6666666.904161.peg.1709	hypothetical protein	bi
1	1710	296	fig|6666666.904161.peg.1710	ATP-binding cassette domain protein	bi
1	1711	449	fig|6666666.904161.peg.1711	Glutamine synthetase type I (EC 6.3.1.2)	bi
1	1712	127	fig|6666666.904161.peg.1712	Transcriptional regulator, repressor of the glutamine synthetase, MerR family	bi
1	1713	312	fig|6666666.904161.peg.1713	tRNA dimethylallyltransferase (EC 2.5.1.75)	bi
1	1714	245	fig|6666666.904161.peg.1714	Glycerophosphoryl diester phosphodiesterase (EC 3.1.4.46)	bi
1	1715	59	fig|6666666.904161.peg.1715	FIG00743062: hypothetical protein	bi
1	1716	138	fig|6666666.904161.peg.1716	Rhodanese-like domain protein	bi
1	1717	207	fig|6666666.904161.peg.1717	Alpha-aspartyl dipeptidase Peptidase E (EC 3.4.13.21)	bi
1	1718	321	fig|6666666.904161.peg.1718	Glucokinase (EC 2.7.1.2)	bi
1	1719	74	fig|6666666.904161.peg.1719	Uncharacterized protein YqgQ	bi
1	1720	228	fig|6666666.904161.peg.1720	GlpG protein (membrane protein of glp regulon)	bi
1	1721	189	fig|6666666.904161.peg.1721	5-formyltetrahydrofolate cyclo-ligase (EC 6.3.3.2)	bi
1	1722	50	fig|6666666.904161.peg.1722	LSU ribosomal protein L33p @ LSU ribosomal protein L33p, zinc-dependent	bi
1	1723	679	fig|6666666.904161.peg.1723	Uncharacterized protein YqgF	bi
1	1724	882	fig|6666666.904161.peg.1724	Uncharacterized membrane protein YfhO-like	bi
1	1725	101	fig|6666666.904161.peg.1725	hypothetical protein	bi
1	1726	152	fig|6666666.904161.peg.1726	Response regulator of the LytR/AlgR family	bi
1	1727	241	fig|6666666.904161.peg.1727	hypothetical protein	bi
1	1728	161	fig|6666666.904161.peg.1728	Transcription elongation factor GreA	bi
1	1729	210	fig|6666666.904161.peg.1729	Uridine kinase (EC 2.7.1.48)	bi
1	1730	397	fig|6666666.904161.peg.1730	Murein endolytic transglycosylase MltG	bi
1	1731	806	fig|6666666.904161.peg.1731	Phenylalanyl-tRNA synthetase beta chain (EC 6.1.1.20)	bi
1	1732	349	fig|6666666.904161.peg.1732	Phenylalanyl-tRNA synthetase alpha chain (EC 6.1.1.20)	bi
1	1733	120	fig|6666666.904161.peg.1733	Transcriptional regulator, HxlR family	bi
1	1734	170	fig|6666666.904161.peg.1734	FIG005986: HD family hydrolase	bi
1	1735	256	fig|6666666.904161.peg.1735	Uncharacterized RNA methyltransferase YsgA	bi
1	1736	91	fig|6666666.904161.peg.1736	Acylphosphate phosphohydrolase (EC 3.6.1.7)	bi
1	1737	308	fig|6666666.904161.peg.1737	Inner membrane protein translocase and chaperone YidC, OxaA protein	bi
1	1738	193	fig|6666666.904161.peg.1738	hypothetical protein	bi
1	1739	394	fig|6666666.904161.peg.1739	Exonuclease SbcD	bi
1	1740	1062	fig|6666666.904161.peg.1740	Exonuclease SbcC	bi
1	1741	323	fig|6666666.904161.peg.1741	Putative prenyltransferase, contains 1,4-dihydroxy-2-naphthoate octaprenyltransferase domain	bi
1	1742	548	fig|6666666.904161.peg.1742	Two-component system sensor histidine kinase	bi
1	1743	229	fig|6666666.904161.peg.1743	Two-component transcriptional response regulator, OmpR family	bi
1	1744	450	fig|6666666.904161.peg.1744	Replication-associated recombination protein RarA	bi
1	1745	479	fig|6666666.904161.peg.1745	6-phosphogluconate dehydrogenase, decarboxylating (EC 1.1.1.44)	bi
1	1746	321	fig|6666666.904161.peg.1746	Cobalt-zinc-cadmium resistance protein	bi
1	1747	195	fig|6666666.904161.peg.1747	hypothetical protein	bi
1	1748	39	fig|6666666.904161.peg.1748	hypothetical protein	bi
1	1749	185	fig|6666666.904161.peg.1749	FIG01269488: protein, clustered with ribosomal protein L32p	bi
1	1750	384	fig|6666666.904161.peg.1750	UPF0348 protein family	bi
1	1751	245	fig|6666666.904161.peg.1751	FIG145533: Methyltransferase (EC 2.1.1.-)	bi
1	1752	119	fig|6666666.904161.peg.1752	Ribosomal silencing factor RsfA	bi
1	1753	206	fig|6666666.904161.peg.1753	Hydrolase (HAD superfamily), YqeK	bi
1	1754	212	fig|6666666.904161.peg.1754	Nicotinate-nucleotide adenylyltransferase (EC 2.7.7.18)	bi
1	1755	105	fig|6666666.904161.peg.1755	RNA-binding protein YhbY	bi
1	1756	379	fig|6666666.904161.peg.1756	GTP-binding protein YqeH, required for biogenesis of 30S ribosome subunit	bi
1	1757	177	fig|6666666.904161.peg.1757	FIG001553: Hydrolase, HAD subfamily IIIA	bi
1	1758	161	fig|6666666.904161.peg.1758	FIG00753306: hypothetical protein	bi
1	1759	485	fig|6666666.904161.peg.1759	Glycosyl transferase	bi
1	1760	249	fig|6666666.904161.peg.1760	Aspartate racemase (EC 5.1.1.13)	bi
1	1761	116	fig|6666666.904161.peg.1761	Transcriptional regulator, HxlR family	bi
1	1762	344	fig|6666666.904161.peg.1762	Zinc-type alcohol dehydrogenase-like protein	bi
1	1763	421	fig|6666666.904161.peg.1763	Replication-associated recombination protein RarA	bi
1	1764	104	fig|6666666.904161.peg.1764	FIG00753821: hypothetical protein	bi
1	1765	119	fig|6666666.904161.peg.1765	LSU ribosomal protein L20p	bi
1	1766	65	fig|6666666.904161.peg.1766	LSU ribosomal protein L35p	bi
1	1767	167	fig|6666666.904161.peg.1767	Translation initiation factor 3	bi
1	1768	689	fig|6666666.904161.peg.1768	Threonyl-tRNA synthetase (EC 6.1.1.3)	bi
1	1769	312	fig|6666666.904161.peg.1769	Helicase loader DnaI	bi
1	1770	468	fig|6666666.904161.peg.1770	Helicase loader DnaB	bi
1	1771	172	fig|6666666.904161.peg.1771	Ribonucleotide reductase transcriptional regulator NrdR	bi
1	1772	198	fig|6666666.904161.peg.1772	Dephospho-CoA kinase (EC 2.7.1.24)	bi
1	1773	275	fig|6666666.904161.peg.1773	Formamidopyrimidine-DNA glycosylase (EC 3.2.2.23)	bi
1	1774	883	fig|6666666.904161.peg.1774	DNA polymerase I (EC 2.7.7.7)	bi
1	1775	239	fig|6666666.904161.peg.1775	Integral membrane protein, interacts with FtsH	bi
1	1776	296	fig|6666666.904161.peg.1776	Transcriptional regulator, Xre family	bi
1	1777	113	fig|6666666.904161.peg.1777	PaaD-like protein (DUF59) involved in Fe-S cluster assembly	bi
1	1778	469	fig|6666666.904161.peg.1778	Iron-sulfur cluster assembly protein SufB	bi
1	1779	156	fig|6666666.904161.peg.1779	Putative iron-sulfur cluster assembly scaffold protein for SUF system, SufE2	bi
1	1780	413	fig|6666666.904161.peg.1780	Cysteine desulfurase (EC 2.8.1.7) => SufS	bi
1	1781	434	fig|6666666.904161.peg.1781	Iron-sulfur cluster assembly protein SufD	bi
1	1782	266	fig|6666666.904161.peg.1782	Iron-sulfur cluster assembly ATPase protein SufC	bi
1	1783	75	fig|6666666.904161.peg.1783	FIG00746298: hypothetical protein	bi
1	1784	663	fig|6666666.904161.peg.1784	Ferrous iron transporter FeoB	bi
1	1785	55	fig|6666666.904161.peg.1785	hypothetical protein	bi
1	1786	437	fig|6666666.904161.peg.1786	UDP-N-acetylmuramate--L-alanine ligase (EC 6.3.2.8)	bi
1	1787	997	fig|6666666.904161.peg.1787	DNA translocase FtsK	bi
1	1788	214	fig|6666666.904161.peg.1788	Phenylalanyl-tRNA synthetase domain protein (Bsu YtpR)	bi
1	1789	108	fig|6666666.904161.peg.1789	FIG00742306: hypothetical protein	bi
1	1790	233	fig|6666666.904161.peg.1790	tRNA (guanine(46)-N(7))-methyltransferase (EC 2.1.1.33)	bi
1	1791	262	fig|6666666.904161.peg.1791	Putative phosphotransferase YtmP	bi
1	1792	402	fig|6666666.904161.peg.1792	ABC transporter, permease protein EscB	bi
1	1793	246	fig|6666666.904161.peg.1793	ABC transporter, ATP-binding protein EcsA	bi
1	1794	151	fig|6666666.904161.peg.1794	Histidine triad (HIT) nucleotide-binding protein, similarity with At5g48545 and yeast YDL125C (HNT1)	bi
1	1795	114	fig|6666666.904161.peg.1795	Hypothetical protein SAV1839	bi
1	1796	299	fig|6666666.904161.peg.1796	Foldase protein PrsA precursor (EC 5.2.1.8) @ Foldase clustered with pyrimidine conversion	bi
1	1797	316	fig|6666666.904161.peg.1797	ADP-ribosylglycohydrolase	-
1	1798	235	fig|6666666.904161.peg.1798	hypothetical protein	bi
1	1799	227	fig|6666666.904161.peg.1799	hypothetical protein	bi
1	1800	349	fig|6666666.904161.peg.1800	cell surface protein precursor	bi
1	1801	124	fig|6666666.904161.peg.1801	cell surface protein precursor	bi
1	1802	1096	fig|6666666.904161.peg.1802	hypothetical protein	bi
1	1803	439	fig|6666666.904161.peg.1803	hypothetical protein	bi
1	1804	96	fig|6666666.904161.peg.1804	Predicted transcriptional regulators	uni
1	1805	392	fig|6666666.904161.peg.1805	Transposase	-
1	1806	245	fig|6666666.904161.peg.1806	Mobile element protein	uni
1	1807	160	fig|6666666.904161.peg.1807	Adenine specific DNA methylase Mod	bi
1	1808	214	fig|6666666.904161.peg.1808	transcriptional regulator, Crp/Fnr family	bi
1	1809	188	fig|6666666.904161.peg.1809	hypothetical protein	bi
1	1810	187	fig|6666666.904161.peg.1810	hypothetical protein	bi
1	1811	160	fig|6666666.904161.peg.1811	6,7-dimethyl-8-ribityllumazine synthase (EC 2.5.1.78)	bi
1	1812	405	fig|6666666.904161.peg.1812	3,4-dihydroxy-2-butanone 4-phosphate synthase (EC 4.1.99.12) / GTP cyclohydrolase II (EC 3.5.4.25)	bi
1	1813	180	fig|6666666.904161.peg.1813	Riboflavin synthase eubacterial/eukaryotic (EC 2.5.1.9)	bi
1	1814	356	fig|6666666.904161.peg.1814	Diaminohydroxyphosphoribosylaminopyrimidine deaminase (EC 3.5.4.26) / 5-amino-6-(5-phosphoribosylamino)uracil reductase (EC 1.1.1.193)	bi
1	1815	850	fig|6666666.904161.peg.1815	Uncharacterized membrane protein YfhO-like	bi
1	1816	76	fig|6666666.904161.peg.1816	MutT/NudX family protein (putative)	uni
1	1817	48	fig|6666666.904161.peg.1817	MutT/NudX family protein (putative)	bi
1	1818	628	fig|6666666.904161.peg.1818	hypothetical protein	bi
1	1819	42	fig|6666666.904161.peg.1819	FIG00748560: hypothetical protein	-
1	1820	332	fig|6666666.904161.peg.1820	Uncharacterized glycosyltransferase YkoT	bi
1	1821	40	fig|6666666.904161.peg.1821	hypothetical protein	-
1	1822	46	fig|6666666.904161.peg.1822	hypothetical protein	bi
1	1823	147	fig|6666666.904161.peg.1823	Nucleoside deoxyribosyltransferase (EC 2.4.2.6)	bi
1	1824	187	fig|6666666.904161.peg.1824	FIG00750436: hypothetical protein	bi
1	1825	813	fig|6666666.904161.peg.1825	flavoprotein subunit related to the succinate dehydrogenases and fumarate reductases	bi
1	1826	205	fig|6666666.904161.peg.1826	FMN reductase-like protein EF_1226	bi
1	1827	316	fig|6666666.904161.peg.1827	Predicted transcriptional regulators	bi
1	1828	324	fig|6666666.904161.peg.1828	nisin resistance protein (putative)	bi
1	1829	387	fig|6666666.904161.peg.1829	hypothetical protein	bi
1	1830	327	fig|6666666.904161.peg.1830	3'->5' exoribonuclease Bsu YhaM	bi
1	1831	827	fig|6666666.904161.peg.1831	hypothetical protein	bi
1	1832	407	fig|6666666.904161.peg.1832	hypothetical protein	bi
1	1833	115	fig|6666666.904161.peg.1833	Hypothetical protein SAV1845	bi
1	1834	710	fig|6666666.904161.peg.1834	Multimodular transpeptidase-transglycosylase (EC 2.4.1.129) (EC 3.4.-.-)	bi
1	1835	41	fig|6666666.904161.peg.1835	hypothetical protein	bi
1	1836	154	fig|6666666.904161.peg.1836	Arginine pathway regulatory protein ArgR, repressor of arg regulon	bi
1	1837	374	fig|6666666.904161.peg.1837	Aspartate aminotransferase (EC 2.6.1.1)	bi
1	1838	203	fig|6666666.904161.peg.1838	Transporter, LysE family	bi
1	1839	484	fig|6666666.904161.peg.1839	Transcriptional regulator, GntR family domain / Aspartate aminotransferase (EC 2.6.1.1)	bi
1	1840	79	fig|6666666.904161.peg.1840	D-alanine--poly(phosphoribitol) ligase ACP subunit (EC 6.1.1.13)	bi
1	1841	204	fig|6666666.904161.peg.1841	D-alanyl-D-alanine carboxypeptidase (EC 3.4.16.4)	bi
1	1842	395	fig|6666666.904161.peg.1842	hypothetical protein	bi
1	1843	491	fig|6666666.904161.peg.1843	6-phospho-beta-glucosidase (EC 3.2.1.86)	bi
1	1844	443	fig|6666666.904161.peg.1844	PTS system, cellobiose-specific IIC component	bi
1	1845	100	fig|6666666.904161.peg.1845	PTS system, beta-glucoside-specific IIB component @ PTS system, cellobiose-specific IIB component (EC 2.7.1.205)	bi
1	1846	113	fig|6666666.904161.peg.1846	PTS system, cellobiose-specific IIA component (EC 2.7.1.205)	bi
1	1847	157	fig|6666666.904161.peg.1847	hypothetical protein	bi
1	1848	852	fig|6666666.904161.peg.1848	hypothetical protein	bi
1	1849	219	fig|6666666.904161.peg.1849	hypothetical protein	bi
1	1850	660	fig|6666666.904161.peg.1850	Macrolide export ATP-binding/permease protein	bi
1	1851	159	fig|6666666.904161.peg.1851	FIG00751738: hypothetical protein	bi
1	1852	563	fig|6666666.904161.peg.1852	Arginyl-tRNA synthetase (EC 6.1.1.19)	bi
1	1853	149	fig|6666666.904161.peg.1853	N-acetyltransferase ElaA	bi
1	1854	82	fig|6666666.904161.peg.1854	hypothetical protein	bi
1	1855	464	fig|6666666.904161.peg.1855	Multi antimicrobial extrusion protein (Na(+)/drug antiporter), MATE family of MDR efflux pumps	bi
1	1856	144	fig|6666666.904161.peg.1856	Mobile element protein	-
1	1857	124	fig|6666666.904161.peg.1857	Mobile element protein	-
1	1858	592	fig|6666666.904161.peg.1858	hypothetical protein	bi
1	1859	498	fig|6666666.904161.peg.1859	hypothetical protein	bi
1	1860	319	fig|6666666.904161.peg.1860	3'-to-5' oligoribonuclease A, Bacillus type	bi
1	1861	123	fig|6666666.904161.peg.1861	FIG146085: 3'-to-5' oligoribonuclease A, Bacillus type	uni
1	1862	208	fig|6666666.904161.peg.1862	Adenylylsulfate kinase (EC 2.7.1.25)	bi
1	1863	392	fig|6666666.904161.peg.1863	Sulfate adenylyltransferase (EC 2.7.7.4)	bi
1	1864	546	fig|6666666.904161.peg.1864	hypothetical protein	bi
1	1865	769	fig|6666666.904161.peg.1865	5-methyltetrahydropteroyltriglutamate--homocysteine methyltransferase (EC 2.1.1.14)	bi
1	1866	321	fig|6666666.904161.peg.1866	5,10-methylenetetrahydrofolate reductase (EC 1.5.1.20) / Homolog of homocysteine-binding domain	uni
1	1867	238	fig|6666666.904161.peg.1867	5,10-methylenetetrahydrofolate reductase (EC 1.5.1.20) / Homolog of homocysteine-binding domain	bi
1	1868	120	fig|6666666.904161.peg.1868	putative membrane protein	bi
1	1869	174	fig|6666666.904161.peg.1869	Teichoic acid glycosylation protein	bi
1	1870	338	fig|6666666.904161.peg.1870	FIG00745551: hypothetical protein	bi
1	1871	40	fig|6666666.904161.peg.1871	hypothetical protein	bi
1	1872	142	fig|6666666.904161.peg.1872	hypothetical protein	bi
1	1873	756	fig|6666666.904161.peg.1873	Excinuclease ABC subunit A paralog of unknown function	bi
1	1874	96	fig|6666666.904161.peg.1874	hypothetical protein	bi
1	1875	171	fig|6666666.904161.peg.1875	hypothetical protein	bi
1	1876	159	fig|6666666.904161.peg.1876	Organic hydroperoxide resistance transcriptional regulator	bi
1	1877	229	fig|6666666.904161.peg.1877	membrane-bound protease, CAAX family	bi
1	1878	124	fig|6666666.904161.peg.1878	hypothetical protein	bi
1	1879	113	fig|6666666.904161.peg.1879	extracellular protein, membrane-anchored (putative)	bi
1	1880	256	fig|6666666.904161.peg.1880	hypothetical protein	bi
1	1881	421	fig|6666666.904161.peg.1881	hypothetical protein	bi
1	1882	203	fig|6666666.904161.peg.1882	hypothetical protein	bi
1	1883	274	fig|6666666.904161.peg.1883	hydrolase, HAD superfamily, Cof family	bi
1	1884	313	fig|6666666.904161.peg.1884	transport protein	bi
1	1885	214	fig|6666666.904161.peg.1885	FIG00743358: hypothetical protein	bi
1	1886	131	fig|6666666.904161.peg.1886	transcriptional regulator, MerR family	bi
1	1887	39	fig|6666666.904161.peg.1887	hypothetical protein	bi
1	1888	268	fig|6666666.904161.peg.1888	Peptide-methionine (S)-S-oxide reductase MsrA (EC 1.8.4.11) / Peptide-methionine (R)-S-oxide reductase MsrB (EC 1.8.4.12)	bi
1	1889	72	fig|6666666.904161.peg.1889	hypothetical protein	-
1	1890	329	fig|6666666.904161.peg.1890	hypothetical protein	bi
1	1891	286	fig|6666666.904161.peg.1891	Efflux ABC transporter, ATP-binding protein	bi
1	1892	246	fig|6666666.904161.peg.1892	ABC transporter, permease protein	bi
1	1893	56	fig|6666666.904161.peg.1893	FIG00750900: hypothetical protein	bi
1	1894	984	fig|6666666.904161.peg.1894	hypothetical protein	bi
1	1895	127	fig|6666666.904161.peg.1895	Large-conductance mechanosensitive channel	bi
1	1896	216	fig|6666666.904161.peg.1896	Deoxyadenosine kinase (EC 2.7.1.76) @ Deoxyguanosine kinase (EC 2.7.1.113)	bi
1	1897	315	fig|6666666.904161.peg.1897	Glycerol-3-phosphate ABC transporter, periplasmic glycerol-3-phosphate-binding protein (TC 3.A.1.1.3)	bi
1	1898	281	fig|6666666.904161.peg.1898	Glycerol-3-phosphate ABC transporter, permease protein UgpE (TC 3.A.1.1.3)	bi
1	1899	322	fig|6666666.904161.peg.1899	Glycerol-3-phosphate ABC transporter, permease protein UgpA (TC 3.A.1.1.3)	bi
1	1900	367	fig|6666666.904161.peg.1900	Glycerol-3-phosphate ABC transporter, ATP-binding protein UgpC (TC 3.A.1.1.3)	bi
1	1901	169	fig|6666666.904161.peg.1901	Universal stress protein family	bi
1	1902	468	fig|6666666.904161.peg.1902	Putative Xaa-His dipeptidase	bi
1	1903	279	fig|6666666.904161.peg.1903	ADP-dependent (S)-NAD(P)H-hydrate dehydratase (EC 4.2.1.136)	bi
1	1904	247	fig|6666666.904161.peg.1904	SSU rRNA pseudouridine(516) synthase (EC 5.4.99.19)	bi
1	1905	557	fig|6666666.904161.peg.1905	Probable cell division protein YtgP	bi
1	1906	809	fig|6666666.904161.peg.1906	Leucyl-tRNA synthetase (EC 6.1.1.4)	bi
1	1907	217	fig|6666666.904161.peg.1907	putative membrane-associated phospholipid phosphatase, PAP2 superfamily	bi
1	1908	176	fig|6666666.904161.peg.1908	Putative rRNA methylase YtqB	bi
1	1909	66	fig|6666666.904161.peg.1909	FIG00749497: hypothetical protein	bi
1	1910	509	fig|6666666.904161.peg.1910	Poly(glycerol-phosphate) alpha-glucosyltransferase (EC 2.4.1.52)	bi
1	1911	503	fig|6666666.904161.peg.1911	Poly(glycerol-phosphate) alpha-glucosyltransferase (EC 2.4.1.52)	bi
1	1912	545	fig|6666666.904161.peg.1912	poly (glycerol-phosphate) alpha-glucosyltransferase	bi
1	1913	2018	fig|6666666.904161.peg.1913	hypothetical protein	bi
1	1914	616	fig|6666666.904161.peg.1914	hypothetical protein	uni
1	1915	501	fig|6666666.904161.peg.1915	Uncharacterized MFS-type transporter	bi
1	1916	396	fig|6666666.904161.peg.1916	S-adenosylmethionine synthetase (EC 2.5.1.6)	bi
1	1917	240	fig|6666666.904161.peg.1917	hypothetical protein	bi
1	1918	500	fig|6666666.904161.peg.1918	Poly(glycerol-phosphate) alpha-glucosyltransferase (EC 2.4.1.52)	bi
1	1919	310	fig|6666666.904161.peg.1919	Homocysteine S-methyltransferase (EC 2.1.1.10)	bi
1	1920	461	fig|6666666.904161.peg.1920	S-methylmethionine permease	bi
1	1921	325	fig|6666666.904161.peg.1921	Ferrochelatase, protoheme ferro-lyase (EC 4.99.1.1)	bi
1	1922	442	fig|6666666.904161.peg.1922	Manganese transport protein MntH	bi
1	1923	36	fig|6666666.904161.peg.1923	hypothetical protein	bi
1	1924	206	fig|6666666.904161.peg.1924	Diadenosine tetraphosphatase and related serine/threonine protein phosphatases	bi
1	1925	79	fig|6666666.904161.peg.1925	Diadenosine tetraphosphatase and related serine/threonine protein phosphatases	uni
1	1926	173	fig|6666666.904161.peg.1926	hypothetical protein	bi
1	1927	174	fig|6666666.904161.peg.1927	FIG00746103: hypothetical protein	bi
1	1928	358	fig|6666666.904161.peg.1928	Guanine/hypoxanthine permease	bi
1	1929	181	fig|6666666.904161.peg.1929	Adenine phosphoribosyltransferase (EC 2.4.2.7)	bi
1	1930	41	fig|6666666.904161.peg.1930	hypothetical protein	bi
1	1931	702	fig|6666666.904161.peg.1931	Lipoteichoic acid synthase LtaS Type IIa	bi
1	1932	79	fig|6666666.904161.peg.1932	hypothetical protein	bi
1	1933	396	fig|6666666.904161.peg.1933	Aspartate aminotransferase (EC 2.6.1.1)	bi
1	1934	413	fig|6666666.904161.peg.1934	D-alanyl-D-alanine carboxypeptidase (EC 3.4.16.4)	bi
1	1935	352	fig|6666666.904161.peg.1935	Integral membrane protein LafC, accessory function in glycolipid and LTA synthesis	bi
1	1936	341	fig|6666666.904161.peg.1936	Glycosyltransferase LafB, responsible for the formation of Gal-Glc-DAG	bi
1	1937	393	fig|6666666.904161.peg.1937	1,2-diacylglycerol 3-glucosyltransferase (EC 2.4.1.337)	bi
1	1938	577	fig|6666666.904161.peg.1938	Phosphoenolpyruvate-protein phosphotransferase of PTS system (EC 2.7.3.9)	bi
1	1939	89	fig|6666666.904161.peg.1939	Phosphotransferase system, phosphocarrier protein HPr	bi
1	1940	66	fig|6666666.904161.peg.1940	FIG00742907: hypothetical protein	bi
1	1941	740	fig|6666666.904161.peg.1941	ATP-dependent Clp protease, ATP-binding subunit ClpE	bi
1	1942	50	fig|6666666.904161.peg.1942	integrase/recombinase, fragment (putative)	bi
1	1943	148	fig|6666666.904161.peg.1943	integrase/recombinase, fragment (putative)	uni
1	1944	130	fig|6666666.904161.peg.1944	hypothetical protein	bi
1	1945	322	fig|6666666.904161.peg.1945	Oligopeptide ABC transporter, ATP-binding protein OppF (TC 3.A.1.5.1)	bi
1	1946	360	fig|6666666.904161.peg.1946	Oligopeptide ABC transporter, ATP-binding protein OppD (TC 3.A.1.5.1)	bi
1	1947	345	fig|6666666.904161.peg.1947	Oligopeptide ABC transporter, permease protein OppC (TC 3.A.1.5.1)	bi
1	1948	310	fig|6666666.904161.peg.1948	Oligopeptide ABC transporter, permease protein OppB (TC 3.A.1.5.1)	bi
1	1949	548	fig|6666666.904161.peg.1949	Oligopeptide ABC transporter, substrate-binding protein OppA (TC 3.A.1.5.1)	bi
1	1950	127	fig|6666666.904161.peg.1950	hypothetical protein	bi
1	1951	282	fig|6666666.904161.peg.1951	Uncharacterized integral membrane protein SSO0015	bi
1	1952	294	fig|6666666.904161.peg.1952	Transcriptional regulator, LysR family	bi
1	1953	342	fig|6666666.904161.peg.1953	FIG00742213: hypothetical protein	bi
1	1954	476	fig|6666666.904161.peg.1954	hypothetical protein	bi
1	1955	45	fig|6666666.904161.peg.1955	hypothetical protein	-
1	1956	43	fig|6666666.904161.peg.1956	FIG00752350: hypothetical protein	uni
1	1957	526	fig|6666666.904161.peg.1957	Peptide chain release factor 3	bi
1	1958	441	fig|6666666.904161.peg.1958	similar to glutathione reductase	bi
1	1959	299	fig|6666666.904161.peg.1959	6-phosphogluconate dehydrogenase, decarboxylating (EC 1.1.1.44)	bi
1	1960	505	fig|6666666.904161.peg.1960	Gluconokinase (EC 2.7.1.12)	bi
1	1961	452	fig|6666666.904161.peg.1961	Gluconate permease, Bsu4004 homolog	bi
1	1962	133	fig|6666666.904161.peg.1962	Glycerol-3-phosphate cytidylyltransferase (EC 2.7.7.39)	bi
1	1963	398	fig|6666666.904161.peg.1963	UPF0118 membrane protein YueF	bi
1	1964	309	fig|6666666.904161.peg.1964	L-lactate dehydrogenase (EC 1.1.1.27)	bi
1	1965	82	fig|6666666.904161.peg.1965	FIG00749209: hypothetical protein	bi
1	1966	126	fig|6666666.904161.peg.1966	Rad protein	bi
1	1967	264	fig|6666666.904161.peg.1967	P60 extracellular protein, invasion associated protein Iap	bi
1	1968	183	fig|6666666.904161.peg.1968	DUF402 family nucleoside diphosphatase	bi
1	1969	268	fig|6666666.904161.peg.1969	Regulatory protein RecX	bi
1	1970	239	fig|6666666.904161.peg.1970	FIG00747578: hypothetical protein	bi
1	1971	183	fig|6666666.904161.peg.1971	RpoE, DNA-directed RNA polymerase specialized sigma subunit, sigma24-like	bi
1	1972	65	fig|6666666.904161.peg.1972	FIG00753785: hypothetical protein	bi
1	1973	71	fig|6666666.904161.peg.1973	FIG00746819: hypothetical protein	bi
1	1974	76	fig|6666666.904161.peg.1974	Small conserved protein	bi
1	1975	102	fig|6666666.904161.peg.1975	FIG00742521: hypothetical protein	bi
1	1976	46	fig|6666666.904161.peg.1976	FIG00747995: hypothetical protein	bi
1	1977	85	fig|6666666.904161.peg.1977	hypothetical protein	bi
1	1978	239	fig|6666666.904161.peg.1978	Glycerol uptake facilitator protein	bi
1	1979	310	fig|6666666.904161.peg.1979	Ribonuclease BN (EC 3.1.-.-)	bi
1	1980	373	fig|6666666.904161.peg.1980	UDP-N-acetylglucosamine 2-epimerase (EC 5.1.3.14)	bi
1	1981	391	fig|6666666.904161.peg.1981	hypothetical protein	bi
1	1982	43	fig|6666666.904161.peg.1982	hypothetical protein	bi
1	1983	449	fig|6666666.904161.peg.1983	NADP-specific glutamate dehydrogenase (EC 1.4.1.4)	bi
1	1984	188	fig|6666666.904161.peg.1984	FIG00747130: hypothetical protein	bi
1	1985	44	fig|6666666.904161.peg.1985	hypothetical protein	bi
1	1986	147	fig|6666666.904161.peg.1986	hypothetical protein	bi
1	1987	67	fig|6666666.904161.peg.1987	hypothetical protein	bi
1	1988	289	fig|6666666.904161.peg.1988	cell surface hydrolase (putative)	bi
1	1989	436	fig|6666666.904161.peg.1989	PTS system, cellobiose-specific IIC component (EC 2.7.1.69)	bi
1	1990	147	fig|6666666.904161.peg.1990	Universal stress protein family	bi
1	1991	445	fig|6666666.904161.peg.1991	ATP-dependent RNA helicase YfmL	bi
1	1992	336	fig|6666666.904161.peg.1992	Oxidoreductase, Gfo/Idh/MocA family	bi
1	1993	40	fig|6666666.904161.peg.1993	hypothetical protein	-
1	1994	67	fig|6666666.904161.peg.1994	Cold shock protein of CSP family	bi
1	1995	122	fig|6666666.904161.peg.1995	conserved hypothetical protein	bi
1	1996	259	fig|6666666.904161.peg.1996	lysozyme, putative	bi
1	1997	293	fig|6666666.904161.peg.1997	Transcriptional regulator, RpiR family	bi
1	1998	295	fig|6666666.904161.peg.1998	cell surface hydrolase (putative)	bi
[truncated: 910 more rows]
